# Supplementary material for: A divergent Plasmodium NEK4 acts as a key regulator driving the early events of meiosis
Source: Research Square preprint supplement (doi:10.21203/rs.3.rs-8180258/v1), 2025-12-09
Supplement: Supplementary file 1 [file 9a66cf8e34b45a95024f64d7.xlsx]

## Sheet: Legend
Legend:
Supp. Table 1: RNA-Seq data analysis of Pbnek4-ko vs WT parasite 2 hpa
Supp. Table 2: Gene Ontology Analysis of RNA-Seq data
Supp. Table 3: Quantitative proteomics of WT 2 hpa versus WT 0 hpa parasites
Supp. Table 4: Quantitative proteomics of Pbnek4-ko 2 hpa versus WT 2 hpa parasites
Supp. Table 5: Quantitative proteomics of Pbnek4-ko 0 hpa versus WT 0 hpa parasites
Supp. Table 6: Quantitative proteomics of Pbnek4-ko 2 hpa versus Pbnek4-ko 0 hpa parasites
Supp. Table 7: Quantitative phosphoproteomics of WT 2 hpa versus WT 0 hpa parasites
Supp. Table 8: Gene Ontology Analysis of phosphoproteomic data for WT 2 hpa versus WT 0 hpa parasites
Supp. Table 9: Quantitative phosphoproteomics of Pbnek4-ko 2 hpa versus WT 2 hpa parasites
Supp. Table 10: Gene Ontology Analysis of phosphoproteomic data for Pbnek4-ko 2 hpa versus WT 2 hpa parasites
Supp. Table 11: Quantitative phosphoproteomics of Pbnek4-ko 2 hpa versus Pbnek4-ko 0 hpa parasites
Supp. Table 12: Quantitative phosphoproteomics of Pbnek4-ko 0 hpa versus WT 0 hpa parasites
Supp. Table 13: GFP-Trap pulldowns of PbNEK4-GFP parasites 2 hpa
Supp. Table 14: Primers used in this study
Note: For Supp. Tables 3-6, 7, 9 and 11-12 entries for mouse proteins have been removed

## Sheet: Supp. Table 1
Supp. Table 1: RNA-Seq data analysis of Pbnek4-ko vs WT parasite 2 hpa
Gene_ID	Gene name	Gene symbol	log2FoldChange	padj
PBANKA_1007661	tRNA Isoleucine		-5.2846	0.0370245
PBANKA_0944121	PIR protein, pseudogene		-4.91578	0.220714
PBANKA_0216021	fam-b protein		-4.69426	0.100916
PBANKA_1200071	PIR protein, pseudogene		-4.60046	0.023551
PBANKA_0837161	PIR protein		-4.36172	0.25091
PBANKA_0600096	PIR protein, pseudogene		-4.1843	0.302142
PBANKA_0900600	PIR protein		-3.77532	0.400428
PBANKA_0100081	PIR protein, pseudogene		-3.50644	0.149678
PBANKA_0700051	PIR protein		-3.50344	0.0158929
PBANKA_1040541	PIR protein		-3.47628	3.55577e-10
PBANKA_0700300	PIR protein		-3.39168	0.00786626
PBANKA_1040621	fam-b protein		-3.36835	0.479929
PBANKA_API00160	DNA-directed RNA polymerase subunit beta', putative	rpoC1	-3.36835	0.479929
PBANKA_0837041	fam-b protein		-3.18095	0.507786
PBANKA_1300100	PIR protein		-3.17303	1.03577e-05
PBANKA_1246800	PIR protein		-3.08382	7.62645e-06
PBANKA_0837061	tryptophan-rich protein, fragment		-3.072	0.523635
PBANKA_0400600	PIR protein		-3.05413	2.50189e-05
PBANKA_1354600	inner membrane complex suture component, putative	ISC1	-3.02335	5.09874e-09
PBANKA_0001001	PIR protein		-3.01116	0.000265339
PBANKA_0706600	conserved Plasmodium protein, unknown function		-3.00988	0.00148393
PBANKA_0716800	conserved Plasmodium protein, unknown function		-3.00743	2.65367e-06
PBANKA_1034500	conserved protein, unknown function		-2.90837	4.52214e-09
PBANKA_0000701	PIR protein		-2.82935	0.561077
PBANKA_1241400	conserved Plasmodium protein, unknown function		-2.8107	3.00828e-14
PBANKA_1462600	conserved Plasmodium protein, unknown function		-2.79141	3.6406e-08
PBANKA_1457700	PIMMS57 protein	PIMMS57	-2.77514	1.18465e-07
PBANKA_1006400	conserved Plasmodium protein, unknown function		-2.74241	1.08494e-05
PBANKA_1106900	PIMMS2 protein	PIMMS2	-2.72188	2.9494e-05
PBANKA_1465841	fam-b protein		-2.70808	0.00897356
PBANKA_0820200	thioredoxin-like protein 1, putative	TrxL1	-2.68229	3.77298e-08
PBANKA_0623600	PIR protein		-2.68026	4.7964e-06
PBANKA_0722200	PIR protein, pseudogene		-2.56016	0.275266
PBANKA_0700011	PIR protein, pseudogene		-2.54998	0.604851
PBANKA_0711600	perforin-like protein 5	PLP5	-2.51705	1.1142e-06
PBANKA_0518100	thioredoxin-like associated protein 2, putative	TLAP2	-2.50645	8.20607e-08
PBANKA_1364400	inner membrane complex protein 1f, putative	IMC1f	-2.4773	7.14993e-13
PBANKA_0718000	conserved Plasmodium protein, unknown function		-2.46485	1.2755e-10
PBANKA_0511000	biotin--protein ligase 1	HCS1	-2.46261	1.09092e-10
PBANKA_0609600	HSP20-like chaperone, putative		-2.4252	9.14656e-07
PBANKA_1025700	inner membrane complex protein 1l, putative	IMC1l	-2.42274	2.2979e-09
PBANKA_1131300	conserved Plasmodium protein, unknown function		-2.40184	3.32277e-09
PBANKA_0522300	conserved Plasmodium protein, unknown function		-2.39367	5.34995e-08
PBANKA_1200021	PIR protein		-2.39059	0.6308
PBANKA_0916650	conserved Plasmodium protein, unknown function		-2.35934	1.04588e-11
PBANKA_0711400	perforin-like protein 4	PLP4	-2.35586	1.58308e-07
PBANKA_0600600	NIMA related kinase 3, putative	NEK3	-2.3406	7.8447e-09
PBANKA_1465800	PIR protein		-2.34007	0.107067
PBANKA_0836900	PIR protein		-2.33567	8.56763e-06
PBANKA_1023100	conserved Plasmodium protein, unknown function		-2.33158	2.7693e-11
PBANKA_0112681	PIR protein		-2.32442	0.353926
PBANKA_0112721	fam-a protein, pseudogene		-2.32143	0.0621361
PBANKA_1432300	cell traversal protein for ookinetes and sporozoites	CelTOS	-2.3057	1.5983e-10
PBANKA_0706500	3'-5' exonuclease, putative		-2.28843	7.72054e-06
PBANKA_0412900	circumsporozoite- and TRAP-related protein	CTRP	-2.28721	3.69766e-12
PBANKA_1410950	apical ring associated protein 1	ARA1	-2.27299	2.8914e-06
PBANKA_0410650	conserved Plasmodium protein, unknown function		-2.25717	3.98957e-08
PBANKA_1112000	conserved Plasmodium protein, unknown function		-2.25042	1.52558e-14
PBANKA_1143700	secreted ookinete protein, putative	PSOP2	-2.23162	9.63883e-12
PBANKA_1400041	fam-b protein		-2.22481	1.47428e-05
PBANKA_0608600	zinc finger protein, putative		-2.18722	4.45533e-14
PBANKA_1232000	WD repeat-containing protein, putative		-2.18637	2.27849e-11
PBANKA_1417400	conserved Plasmodium protein, unknown function		-2.1801	6.30499e-14
PBANKA_1200400	PIR protein		-2.17109	3.16297e-07
PBANKA_1445000	subpellicular microtubule protein 2, putative	SPM2	-2.16978	4.4675e-10
PBANKA_1466100	PIR protein		-2.16291	0.000504887
PBANKA_1246400	PIR protein		-2.15418	2.54292e-05
PBANKA_0000301	fam-b protein		-2.15329	0.00255711
PBANKA_1110000	PDCD2 domain-containing protein, putative		-2.14861	1.34934e-14
PBANKA_1110200	conserved Plasmodium protein, unknown function		-2.14738	6.50006e-11
PBANKA_0714300	small heat shock protein HSP20	HSP20	-2.14167	1.20071e-10
PBANKA_1323800	kelch domain-containing protein, putative		-2.13187	1.16771e-14
PBANKA_0007801	fam-b protein, pseudogene		-2.12764	0.671741
PBANKA_1100300	PIR protein, pseudogene		-2.12764	0.671741
PBANKA_API00140	hypothetical protein	ORF101	-2.12764	0.671741
PBANKA_API00150	DNA-directed RNA polymerase subunit beta, putative	rpoB	-2.12764	0.671741
PBANKA_API00170	DNA-directed RNA polymerase subunit beta'', putative	rpoC2	-2.12764	0.671741
PBANKA_0406900	conserved protein, unknown function		-2.1252	1.51915e-07
PBANKA_1009900	conserved Plasmodium protein, unknown function		-2.11695	1.04467e-08
PBANKA_0505000	dihydrolipoamide acyltransferase, putative		-2.11651	6.21288e-06
PBANKA_1040500	PIR protein, pseudogene		-2.10758	0.337494
PBANKA_1456700	conserved Plasmodium protein, unknown function		-2.10601	9.76987e-06
PBANKA_1353800	ROVER protein	ROVER	-2.09389	5.88323e-11
PBANKA_0824500	lipoate-protein ligase 2	LplA2	-2.08941	9.42263e-09
PBANKA_0910500	conserved protein, unknown function		-2.08601	0.000137234
PBANKA_1109300	conserved Plasmodium protein, unknown function		-2.08343	2.77058e-11
PBANKA_1421241	tRNA Leucine		-2.07624	0.00153232
PBANKA_1138100	14-3-3 protein, putative	14-3-3II	-2.06992	6.48517e-09
PBANKA_1465921	PIR protein		-2.06392	0.00376802
PBANKA_1353500	exosome complex component RRP42, putative	RRP42	-2.0574	8.95389e-09
PBANKA_0304100	conserved Plasmodium protein, unknown function		-2.05613	5.50851e-15
PBANKA_1435900	conserved Plasmodium protein, unknown function	UIS27	-2.04848	0.000454386
PBANKA_0837101	PIR protein		-2.03278	0.0364164
PBANKA_1219100	inner membrane complex protein 1d	IMC1d	-2.03105	2.17341e-12
PBANKA_0916700	conserved Plasmodium protein, unknown function		-2.0298	4.43983e-08
PBANKA_1101200	Plasmodium exported protein, unknown function		-2.02745	1.27623e-12
PBANKA_0312000	conserved Plasmodium protein, unknown function		-2.02697	1.75629e-09
PBANKA_0600200	PIR protein		-2.01339	2.75875e-05
PBANKA_1225500	conserved protein, unknown function		-2.00727	1.79607e-13
PBANKA_0621800	ubiquinone biosynthesis O-methyltransferase, putative	COQ3	-1.99998	1.01833e-07
PBANKA_1037800	secreted ookinete adhesive protein	SOAP	-1.99958	1.14916e-08
PBANKA_0916500	conserved Plasmodium protein, unknown function		-1.99086	0.000206803
PBANKA_0311500	conserved Plasmodium protein, unknown function		-1.9893	4.16753e-11
PBANKA_0821400	ADP-ribosylation factor, putative		-1.98418	4.63272e-08
PBANKA_1119921	tRNA Alanine		-1.98242	0.0287658
PBANKA_1320800	conserved Plasmodium protein, unknown function		-1.97683	2.68616e-11
PBANKA_0824200	perforin-like protein 3	PLP3	-1.97585	5.44742e-16
PBANKA_0513000	inner membrane complex protein 1m, putative	IMC1m	-1.97055	1.83966e-14
PBANKA_0921200	conserved Plasmodium protein, unknown function		-1.9694	2.79295e-07
PBANKA_0943700	fam-b protein		-1.96506	2.30872e-05
PBANKA_0403300	conserved Plasmodium membrane protein, unknown function		-1.96265	2.00239e-08
PBANKA_1342500	subpellicular microtubule protein 3	SPM3	-1.95155	2.53384e-22
PBANKA_1117600	LMBR1 domain-containing protein, putative		-1.94377	3.96211e-06
PBANKA_0830400	G2 protein		-1.94243	1.79436e-09
PBANKA_1228900	von Willebrand factor A domain-related protein	WARP	-1.94231	1.45415e-11
PBANKA_1203600	conserved Plasmodium protein, unknown function		-1.94178	3.41691e-07
PBANKA_1465200	PIR protein		-1.93489	0.0141476
PBANKA_0110800	conserved Plasmodium protein, unknown function		-1.93289	8.22836e-11
PBANKA_1119941	tRNA Leucine		-1.93013	0.0913568
PBANKA_1318500	conserved Plasmodium protein, unknown function		-1.92891	8.22836e-11
PBANKA_0824000	OTU domain-containing protein, putative		-1.92246	1.13159e-09
PBANKA_0300300	PIR protein		-1.91757	0.678299
PBANKA_1465600	PIR protein		-1.91526	0.00249985
PBANKA_1354900	inner membrane complex protein 1k, putative	IMC1k	-1.91262	5.03108e-11
PBANKA_1129000	secreted ookinete protein, putative	PSOP6	-1.90755	2.18097e-07
PBANKA_0408200	calcium-dependent protein kinase 3	CDPK3	-1.90722	4.46664e-11
PBANKA_0915400	conserved Plasmodium protein, unknown function		-1.90274	5.51754e-06
PBANKA_0600100	PIR protein		-1.89446	3.55339e-05
PBANKA_1335000	conserved Plasmodium protein, unknown function		-1.89446	2.72692e-08
PBANKA_0617800	conserved Plasmodium protein, unknown function		-1.89372	4.52214e-09
PBANKA_0722600	fam-b protein		-1.88688	0.266009
PBANKA_0719800	conserved Plasmodium protein, unknown function		-1.88554	1.59008e-08
PBANKA_1311300	inner membrane complex protein, putative		-1.88475	6.16828e-08
PBANKA_0807200	conserved Plasmodium protein, unknown function		-1.883	4.20861e-08
PBANKA_1451100	conserved Plasmodium protein, unknown function		-1.88179	3.36046e-09
PBANKA_1414800	conserved Plasmodium protein, unknown function		-1.8771	3.68122e-07
PBANKA_1300250	erythrocyte membrane antigen 1, pseudogene		-1.87587	8.87904e-07
PBANKA_1300081	PIR protein, pseudogene		-1.87229	0.341626
PBANKA_1009600	conserved protein, unknown function		-1.87127	1.0988e-13
PBANKA_1461300	conserved Plasmodium protein, unknown function		-1.86961	4.16387e-10
PBANKA_0706700	dicarboxylate/tricarboxylate carrier, putative	DTC	-1.86854	2.45568e-14
PBANKA_1430300	conserved Plasmodium protein, unknown function		-1.86807	1.10017e-07
PBANKA_1020800	conserved Plasmodium protein, unknown function		-1.86335	3.36396e-14
PBANKA_1239000	conserved Plasmodium membrane protein, unknown function		-1.85802	2.95957e-09
PBANKA_0301600	WD repeat-containing protein, putative		-1.85529	1.09853e-10
PBANKA_1435000	conserved Plasmodium protein, unknown function		-1.85508	0.000485247
PBANKA_1110600	conserved Plasmodium protein, unknown function		-1.85456	1.84116e-07
PBANKA_1433600	thrombospondin-related apical membrane protein	TRAMP	-1.85265	7.87651e-05
PBANKA_1451200	p25-alpha family protein, putative		-1.85257	6.48517e-09
PBANKA_1233700	conserved protein, unknown function		-1.8511	1.45804e-08
PBANKA_0816800	glycolipid transfer protein, putative	GLTP	-1.84943	1.26783e-10
PBANKA_1245150	dolichol-phosphate mannosyltransferase subunit 3, putative	DPM3	-1.84837	3.63631e-07
PBANKA_1436500	EF hand domain-containing protein, putative		-1.84329	3.5645e-12
PBANKA_1311400	conserved protein, unknown function		-1.84279	4.20668e-06
PBANKA_1006200	sporozoite invasion-associated protein 1	SIAP1	-1.84219	4.22988e-05
PBANKA_0703300	conserved protein, unknown function		-1.83417	5.58238e-08
PBANKA_0600031	PIR protein		-1.83254	0.0210922
PBANKA_0612900	conserved Plasmodium protein, unknown function		-1.8299	2.47337e-06
PBANKA_0600086	PIR protein		-1.8254	1.69958e-05
PBANKA_0517600	plasmepsin VII		-1.82129	5.53246e-08
PBANKA_1143400	NADH-cytochrome b5 reductase, putative		-1.81505	6.56266e-11
PBANKA_0001101	PIR protein		-1.81383	0.0410376
PBANKA_1422900	structural integrity maintenance protein SIMP	SIMP	-1.81325	1.17725e-07
PBANKA_1136000	ADP-ribosylation factor, putative		-1.81176	7.99389e-08
PBANKA_1329900	conserved Plasmodium protein, unknown function		-1.81172	7.64121e-07
PBANKA_0810700	subpellicular microtubule protein 1, putative	SPM1	-1.81037	2.89928e-12
PBANKA_1024400	calmodulin, putative		-1.80959	6.87698e-10
PBANKA_0402700	inner membrane complex protein 1e	IMC1e	-1.80474	9.11435e-13
PBANKA_1007900	conserved Plasmodium protein, unknown function		-1.80468	8.70327e-10
PBANKA_0832000	selenoprotein 2, putative	SEL2	-1.80436	1.97624e-05
PBANKA_1459500	myosin A-tail interacting protein	MTIP	-1.8031	3.555e-06
PBANKA_0203750	phosphatidate cytidylyltransferase, putative		-1.80284	1.7092e-08
PBANKA_0712500	dynactin subunit 6, putative		-1.80123	5.7111e-08
PBANKA_0918400	Brr1 domain-containing protein		-1.79904	3.61281e-11
PBANKA_1363600	conserved Plasmodium protein, unknown function		-1.79823	2.59402e-09
PBANKA_1020300	ankyrin-repeat protein, putative		-1.7973	3.40957e-12
PBANKA_1353400	secreted ookinete protein, putative	PSOP7	-1.79541	2.66906e-09
PBANKA_1028900	diphthamide biosynthesis protein 1, putative	DPH1	-1.79517	1.91027e-06
PBANKA_1465051	Plasmodium exported protein, unknown function		-1.78985	0.0152829
PBANKA_0932600	conserved protein, unknown function		-1.78422	8.20093e-08
PBANKA_0704900	crystalloid-specific PH domain-containing protein, putative	CryPH	-1.78303	2.94732e-09
PBANKA_1333700	cGMP-specific 3',5'-cyclic phosphodiesterase delta	PDEdelta	-1.78302	3.2279e-10
PBANKA_1100351	PIR protein		-1.78052	0.000153649
PBANKA_0518500	ADP-ribosylation factor, putative		-1.7787	3.14995e-08
PBANKA_0800200	fam-a protein, pseudogene		-1.77868	1.46792e-05
PBANKA_0104500	conserved Plasmodium protein, unknown function		-1.77469	5.801e-09
PBANKA_1313200	AP2 domain transcription factor AP2-O5, putative	AP2-O5	-1.77216	4.7315e-10
PBANKA_1240700	NIMA related kinase 2	NEK2	-1.77207	5.07987e-11
PBANKA_0510300	conserved Plasmodium protein, unknown function		-1.76558	6.95502e-09
PBANKA_0707100	inner membrane complex protein 1i	IMC1i	-1.76547	1.56039e-11
PBANKA_1357900	RING zinc finger protein, putative		-1.76278	1.373e-09
PBANKA_1120400	inner membrane complex protein 1j, putative	ALV7	-1.76117	1.20917e-10
PBANKA_1423700	GDP-mannose 4,6-dehydratase, putative	GMD	-1.76108	2.44381e-07
PBANKA_0515000	ookinete surface protein P25	P25	-1.75784	8.29593e-08
PBANKA_1358500	inner membrane complex protein, putative		-1.75616	2.32816e-08
PBANKA_0606200	41-3 protein, putative		-1.75397	5.435e-09
PBANKA_0623150	conserved rodent malaria protein, unknown function		-1.75054	4.649e-06
PBANKA_1202000	inner membrane complex protein 1c	IMC1c	-1.74843	5.31237e-12
PBANKA_0622400	kinesin-20		-1.74477	1.45626e-15
PBANKA_1018000	conserved Plasmodium protein, unknown function		-1.74317	2.11391e-13
PBANKA_0101500	conserved Plasmodium protein, unknown function		-1.73706	6.20182e-09
PBANKA_0722100	PIR protein, pseudogene		-1.73611	0.361802
PBANKA_0615500	conserved Plasmodium protein, unknown function		-1.7314	3.68813e-17
PBANKA_1246161	fam-a protein		-1.72998	1.8194e-06
PBANKA_0906800	vacuolar protein sorting-associated protein IST1-like, putative		-1.72811	1.33832e-06
PBANKA_1325200	meiotic nuclear division protein 1, putative	MND1	-1.72237	1.79532e-10
PBANKA_1103300	myosin B	MyoB	-1.71975	1.13451e-05
PBANKA_1357700	aspartate carbamoyltransferase, putative	ATCase	-1.71537	1.22048e-11
PBANKA_1204500	conserved Plasmodium protein, unknown function		-1.71151	5.70062e-06
PBANKA_1437700	conserved Plasmodium protein, unknown function		-1.70928	3.81954e-08
PBANKA_1325100	MORN repeat protein, putative		-1.70783	1.48614e-11
PBANKA_1245200	CPW-WPC family protein		-1.70562	2.52451e-06
PBANKA_1236200	conserved Plasmodium protein, unknown function		-1.70493	1.76743e-05
PBANKA_0605800	LIMP protein	LIMP	-1.70446	9.09689e-07
PBANKA_0105100	conserved Plasmodium protein, unknown function		-1.7032	1.06944e-06
PBANKA_0412400	RING finger protein RNF1, putative	RNF1	-1.70056	0.00195123
PBANKA_0515350	OTU-like cysteine protease, putative	OTU	-1.69744	6.70872e-16
PBANKA_0929300	actin-related protein 2/3 complex subunit 1, putative	ARC40	-1.6968	1.19888e-08
PBANKA_1347000	conserved protein, unknown function		-1.69676	3.05112e-07
PBANKA_0814500	protein AMR4, putative		-1.69605	9.04696e-07
PBANKA_1019100	DEAD/DEAH box helicase, putative		-1.69584	3.56732e-14
PBANKA_1143800	conserved Plasmodium protein, unknown function		-1.69327	1.12785e-15
PBANKA_1437600	glideosome-associated protein 45, putative	GAP45	-1.68813	5.65883e-07
PBANKA_0600251	PIR protein, pseudogene		-1.68353	0.00186778
PBANKA_1463300	conserved Plasmodium protein, unknown function		-1.68303	1.2121e-08
PBANKA_1346300	CPW-WPC family protein	UIS19	-1.68287	5.91123e-11
PBANKA_0514900	ookinete surface protein P28	P28	-1.6809	8.11381e-09
PBANKA_0512000	palmitoyltransferase DHHC10	DHHC10	-1.68046	1.48126e-09
PBANKA_0909400	conserved Plasmodium protein, unknown function		-1.67997	9.94649e-12
PBANKA_0821200	conserved Plasmodium protein, unknown function		-1.67965	2.13385e-07
PBANKA_0943400	CPW-WPC family protein		-1.67446	5.30879e-10
PBANKA_0926500	peptidase M16, putative		-1.67424	4.49735e-12
PBANKA_0908600	conserved Plasmodium protein, unknown function		-1.66734	6.00866e-07
PBANKA_0823200	conserved protein, unknown function		-1.6657	2.93617e-05
PBANKA_1444800	thioredoxin-like associated protein 1, putative	TLAP1	-1.6642	5.94577e-08
PBANKA_1240600	inner membrane complex protein 1g, putative	IMC1g	-1.66316	3.47707e-07
PBANKA_0709900	conserved Plasmodium protein, unknown function		-1.66167	0.116726
PBANKA_1019580	small nucleolar RNA snoR23		-1.65821	0.157014
PBANKA_1246700	PIR protein		-1.6569	0.004886
PBANKA_1124700	conserved Plasmodium protein, unknown function		-1.65626	1.89269e-14
PBANKA_0916300	RNA-binding protein, putative		-1.65434	0.0667031
PBANKA_1145200	conserved Plasmodium protein, unknown function		-1.65102	7.26563e-09
PBANKA_0714500	male gamete fusion factor HAP2P, putative	HAP2P	-1.65087	3.02402e-05
PBANKA_1238500	conserved Plasmodium protein, unknown function		-1.64465	1.9666e-12
PBANKA_0937500	C2 domain-containing membrane protein, putative	C2DMA	-1.6441	5.27788e-10
PBANKA_1465861	tryptophan-rich protein, pseudogene		-1.64214	0.749262
PBANKA_1329400	conserved protein, unknown function		-1.63565	6.23022e-07
PBANKA_0704800	PH-like domain-containing protein, putative		-1.63306	3.74007e-08
PBANKA_1363700	AP2 domain transcription factor AP2-O4	AP2-O4	-1.63294	2.2169e-09
PBANKA_0700200	PIR protein		-1.63286	0.00906787
PBANKA_0513700	conserved Plasmodium protein, unknown function		-1.62992	2.18668e-06
PBANKA_1334700	transmembrane protein 43, putative	TMEM43	-1.62848	1.61885e-08
PBANKA_0602600	cytochrome c1 heme lyase	CC1HL	-1.62785	6.46465e-06
PBANKA_1026000	conserved protein, unknown function		-1.6266	4.09922e-08
PBANKA_0912500	conserved Plasmodium protein, unknown function		-1.62634	9.48305e-14
PBANKA_0907900	conserved Plasmodium protein, unknown function		-1.62318	2.79957e-15
PBANKA_0936600	RNA cytosine C(5)-methyltransferase NSUN2, putative	NSUN2	-1.61947	1.58659e-10
PBANKA_1324300	inner membrane complex sub-compartment protein 3	ISP3	-1.619	1.81188e-07
PBANKA_1019360	small nucleolar RNA snoR29		-1.61717	0.000225694
PBANKA_0938200	conserved Plasmodium protein, unknown function		-1.61465	0.000280565
PBANKA_0940500	conserved Plasmodium protein, unknown function		-1.61018	0.0012982
PBANKA_0502650	conserved Plasmodium protein, unknown function		-1.60921	1.96394e-08
PBANKA_1354351	tRNA Arginine		-1.60803	0.000346787
PBANKA_1365700	PIR protein		-1.60585	8.94999e-05
PBANKA_0810300	conserved Plasmodium protein, unknown function		-1.6034	7.49574e-08
PBANKA_1033600	tRNA-dihydrouridine synthase, putative		-1.60063	3.19581e-06
PBANKA_0943541	tRNA Leucine		-1.59557	0.24456
PBANKA_1114100	conserved Plasmodium protein, unknown function		-1.59299	3.67765e-05
PBANKA_1317000	Yos1-like protein, putative		-1.5882	0.755683
PBANKA_0938000	conserved Plasmodium protein, unknown function		-1.5875	3.09099e-07
PBANKA_0523600	BSD-domain protein, putative		-1.58697	1.24788e-06
PBANKA_1317200	NAD(P) transhydrogenase	NTH	-1.58541	9.63883e-12
PBANKA_0902700	conserved Plasmodium protein, unknown function		-1.58515	9.15021e-10
PBANKA_0720900	CRONE protein	CRONE	-1.58417	5.3092e-06
PBANKA_0306600	conserved Plasmodium protein, unknown function		-1.57993	2.73262e-13
PBANKA_1315300	LCCL domain-containing protein	LAP5	-1.5772	2.41652e-08
PBANKA_0939500	DNA repair protein RAD51	RAD51	-1.57342	1.86931e-13
PBANKA_1132300	conserved Plasmodium protein, unknown function		-1.5732	6.41103e-10
PBANKA_API00130	hypothetical protein	ORF51	-1.57286	0.760714
PBANKA_0307600	syntaxin, putative		-1.56859	5.18902e-06
PBANKA_0603300	sexual stage-specific protein G37	G37	-1.56611	5.29809e-07
PBANKA_1460700	dipeptidyl aminopeptidase 2	DPAP2	-1.566	5.7835e-09
PBANKA_1223200	coenzyme Q-binding protein COQ10 homolog, mitochondrial, putative	COQ10	-1.56351	4.72558e-07
PBANKA_1128800	CPW-WPC family protein		-1.56292	1.2007e-05
PBANKA_0941000	conserved Plasmodium protein, unknown function		-1.56272	1.33667e-07
PBANKA_0800500	chitinase	CHT1	-1.55811	0.079733
PBANKA_1115300	glideosome-associated protein 40, putative	GAP40	-1.55757	5.49708e-06
PBANKA_1338100	CRYSP protein	CRYSP	-1.55738	9.32457e-06
PBANKA_1330700	50S ribosomal protein L22, apicoplast, putative	RPL22	-1.55733	6.00866e-07
PBANKA_1336600	conserved protein, unknown function		-1.55591	8.87138e-08
PBANKA_1106000	conserved Plasmodium protein, unknown function		-1.55432	1.41355e-05
PBANKA_0613600	phosphopantothenate--cysteine ligase, putative	PPCS	-1.55332	7.82868e-09
PBANKA_0615900	cysteine repeat modular protein 2	CRMP2	-1.5533	0.121457
PBANKA_0923300	conserved protein, unknown function		-1.55219	7.81618e-08
PBANKA_1346900	conserved protein, unknown function		-1.55101	1.1179e-07
PBANKA_0100061	fam-c protein		-1.55095	0.00032522
PBANKA_0818400	conserved Plasmodium protein, unknown function		-1.54756	8.43558e-08
PBANKA_0102100	dihydroorotate dehydrogenase, putative	DHODH	-1.54514	2.53619e-06
PBANKA_1422000	conserved protein, unknown function		-1.54302	6.12501e-07
PBANKA_1137400	conserved Plasmodium protein, unknown function		-1.5428	9.13431e-08
PBANKA_0823800	3-oxoacyl-[acyl-carrier-protein] reductase, putative	FabG	-1.54207	1.24144e-05
PBANKA_1006300	perforin-like protein 1	PLP1	-1.54198	1.1543e-05
PBANKA_0317181	PIR protein		-1.54086	0.000376439
PBANKA_0602500	threonylcarbamoyl-AMP synthase, putative	SUA5	-1.54085	4.62107e-11
PBANKA_1463900	HSP20-like chaperone, putative		-1.53907	1.82593e-08
PBANKA_1112700	conserved protein, unknown function		-1.53532	2.32816e-08
PBANKA_0721000	conserved protein, unknown function		-1.53421	4.53464e-10
PBANKA_0902900	PH-like domain-containing protein, putative		-1.53329	1.76582e-06
PBANKA_1305500	acid cluster protein 33 homologue, putative		-1.53113	4.28241e-15
PBANKA_0608000	porphobilinogen deaminase	PBGD	-1.52821	6.60729e-09
PBANKA_1460000	rac-beta serine/threonine protein kinase, putative	PKB	-1.52808	7.15627e-06
PBANKA_1453900	conserved protein, unknown function		-1.52698	1.57682e-07
PBANKA_1417200	protein AAP4, putative		-1.52618	5.87624e-10
PBANKA_0203600	conserved Plasmodium protein, unknown function		-1.52576	9.90425e-08
PBANKA_1355700	myosin A	MyoA	-1.52431	5.60613e-07
PBANKA_0400900	conserved protein, unknown function		-1.5207	1.76343e-07
PBANKA_1232600	doublecortin domain-containing protein, putative	DCX	-1.5202	3.65762e-08
PBANKA_0316861	PIR protein		-1.51903	0.000592058
PBANKA_1211400	zinc finger protein, putative		-1.51786	2.66163e-11
PBANKA_0603100	conserved Plasmodium protein, unknown function		-1.51634	0.0010382
PBANKA_0817100	thioredoxin 3, putative	TRX3	-1.5131	1.28473e-06
PBANKA_1241100	WD repeat-containing protein 55, putative	WDR55	-1.51276	1.02036e-14
PBANKA_1360400	conserved protein, unknown function		-1.51205	3.01349e-06
PBANKA_0216721	Plasmodium exported protein, unknown function		-1.51203	0.705207
PBANKA_1107000	subtilisin propeptide-like protein, putative	SUB1-ProM	-1.51203	1.68833e-05
PBANKA_0110900	cytoplasmic tRNA 2-thiolation protein 1, putative	NCS6	-1.51136	6.82099e-07
PBANKA_1325400	conserved Plasmodium protein, unknown function		-1.50804	4.56013e-07
PBANKA_0402200	plasmoredoxin	Plrx	-1.5075	2.73157e-05
PBANKA_1360200	conserved Plasmodium protein, unknown function		-1.50044	2.51406e-07
PBANKA_0201100	PIR protein, pseudogene		-1.50041	0.101968
PBANKA_1200500	PIR protein, pseudogene		-1.50032	0.639506
PBANKA_0827400	conserved Plasmodium protein, unknown function		-1.49974	2.55029e-13
PBANKA_0213800	zinc finger protein, putative		-1.49909	9.40348e-07
PBANKA_1233600	secreted ookinete protein, putative	PSOP13	-1.49854	3.26996e-05
PBANKA_1449300	upregulated in late gametocytes ULG8, putative	ULG8	-1.49833	1.48614e-11
PBANKA_1422800	conserved Plasmodium protein, unknown function		-1.49777	1.48614e-11
PBANKA_0700541	PIR protein		-1.49754	0.0239457
PBANKA_0906100	conserved Plasmodium protein, unknown function		-1.49741	1.0697e-07
PBANKA_1237600	zinc finger protein, putative		-1.4967	7.38098e-19
PBANKA_1002200	6-cysteine protein P52	P36p	-1.49379	0.426777
PBANKA_1246500	PIR protein		-1.4924	0.00193659
PBANKA_0700071	PIR protein		-1.49239	0.000403833
PBANKA_1352500	CPW-WPC family protein		-1.49208	8.12395e-10
PBANKA_1450800	WD repeat-containing protein, putative		-1.49142	1.74815e-16
PBANKA_0107800	citrate synthase-like protein, putative		-1.49098	9.24719e-06
PBANKA_0713200	conserved protein, unknown function		-1.49025	4.09025e-08
PBANKA_0605000	thiosulfate sulfurtransferase, putative	TUM1	-1.48635	1.17511e-06
PBANKA_1337900	conserved Plasmodium protein, unknown function		-1.48556	8.84686e-08
PBANKA_0510700	conserved Plasmodium protein, unknown function		-1.48507	0.000580487
PBANKA_0907100	inner membrane complex protein 1b	IMC1b	-1.48294	9.55906e-08
PBANKA_1338200	beta-hydroxyacyl-ACP dehydratase, putative	FabZ	-1.48203	4.21345e-06
PBANKA_0510500	conserved Plasmodium protein, unknown function		-1.48199	4.19043e-10
PBANKA_1318600	conserved protein, unknown function		-1.4809	7.32057e-06
PBANKA_1403700	AP2 domain transcription factor, putative	ApiAP2	-1.48086	1.06436e-07
PBANKA_1120200	pyridoxine biosynthesis protein PDX1, putative	PDX1	-1.47808	2.2165e-05
PBANKA_1462500	leucine-rich repeat protein	LRR12	-1.47718	0.0134186
PBANKA_0836921	PIR protein		-1.47512	0.760714
PBANKA_0316900	PIR protein		-1.47324	0.0451537
PBANKA_0815800	GINS complex subunit Psf3, putative		-1.46387	2.51406e-07
PBANKA_1218100	oocyst capsule protein Cap380	Cap380	-1.46343	4.73897e-05
PBANKA_0824100	nitric oxide synthase, putative	NOS	-1.45817	2.03617e-08
PBANKA_1355300	conserved Plasmodium protein, unknown function		-1.45734	4.75828e-05
PBANKA_1309600	conserved Plasmodium protein, unknown function		-1.45575	0.00411338
PBANKA_0829600	serine/threonine protein kinase, putative		-1.45564	1.29168e-06
PBANKA_0716400	conserved Plasmodium protein, unknown function		-1.45233	1.07191e-05
PBANKA_1210000	heptatricopeptide repeat-containing protein, putative		-1.45044	3.6647e-06
PBANKA_1021100	DnaJ protein, putative		-1.44986	5.90915e-08
PBANKA_0417200	PH domain-containing protein	PH	-1.44924	9.60148e-08
PBANKA_1334900	conserved Plasmodium protein, unknown function		-1.44778	3.54643e-07
PBANKA_0927600	conserved Plasmodium protein, unknown function		-1.44712	4.13272e-13
PBANKA_1414500	glycogen synthase kinase-3 alpha, putative	GSK3alpha	-1.44638	4.91552e-05
PBANKA_1225400	gamete release protein	GAMER	-1.44593	0.00151634
PBANKA_1103700	AN1-type zinc finger protein, putative		-1.44571	5.63593e-06
PBANKA_1336200	conserved Plasmodium protein, unknown function		-1.4457	1.76582e-06
PBANKA_1243100	F-actin-capping protein subunit alpha	CPalpha	-1.44553	1.29712e-07
PBANKA_0504400	conserved Plasmodium protein, unknown function		-1.44441	1.9412e-10
PBANKA_0819000	glideosome-associated protein 50, putative	GAP50	-1.4443	3.83746e-06
PBANKA_1363200	ubiquitin-activating enzyme E1, putative		-1.4406	1.89911e-05
PBANKA_1109900	stripes inner membrane complex protein, putative	SIP	-1.44029	1.75303e-10
PBANKA_1338900	glideosome associated protein with multiple membrane spans 1, putative	GAPM1	-1.44013	2.11919e-06
PBANKA_0817300	conserved Plasmodium protein, unknown function		-1.43921	1.35531e-06
PBANKA_1355900	phosphoenolpyruvate carboxykinase, putative	PEPCK	-1.43827	3.01349e-06
PBANKA_0109800	EF hand domain-containing protein, putative		-1.438	4.4306e-08
PBANKA_0816300	heptatricopeptide repeat-containing protein, putative		-1.43748	9.29941e-08
PBANKA_1355600	sporozoite protein essential for cell traversal	SPECT1	-1.43453	0.000410351
PBANKA_1100860	fam-c protein		-1.43434	1.16287e-05
PBANKA_1436600	inner membrane complex protein 1h	IMC1h	-1.43413	1.40726e-05
PBANKA_0616700	NIMA related kinase 4	NEK4	-1.43399	0.000251976
PBANKA_0620300	conserved protein, unknown function		-1.43391	1.32382e-07
PBANKA_0511700	meiotic recombination protein SPO11-2, putative	SPO11-2	-1.43352	9.7754e-08
PBANKA_1129800	tetratricopeptide repeat protein, putative		-1.43203	8.70896e-05
PBANKA_0700061	PIR protein		-1.43068	0.00528548
PBANKA_1038400	selenoprotein 1, putative	SEL1	-1.43032	4.2939e-06
PBANKA_1015000	ribosomal protein L15, mitochondrial, putative		-1.42991	2.23807e-11
PBANKA_0407200	dual specificity protein phosphatase	YVH1	-1.42396	2.289e-08
PBANKA_1229900	conserved protein, unknown function		-1.42169	3.72004e-08
PBANKA_1015400	CPW-WPC family protein		-1.42048	4.16387e-10
PBANKA_1424500	conserved Plasmodium protein, unknown function		-1.42027	3.17876e-10
PBANKA_0819600	conserved Plasmodium protein, unknown function		-1.41924	5.68332e-05
PBANKA_0315800	ribosome associated membrane protein RAMP4, putative		-1.41905	1.4444e-05
PBANKA_1214400	conserved Plasmodium protein, unknown function		-1.41771	3.96657e-06
PBANKA_0201700	PIMMS1 protein	PIMMS1	-1.41738	0.00147863
PBANKA_1318800	protein tyrosine phosphatase	PTP1	-1.41068	5.10807e-06
PBANKA_1000451	PIR protein, pseudogene		-1.40781	0.40448
PBANKA_1119200	PIMMS43 protein	PIMMS43	-1.40676	3.22152e-05
PBANKA_0311400	serine/threonine protein kinase STK2	STK2	-1.40666	3.16387e-10
PBANKA_1008300	GTP-binding protein, putative		-1.40609	2.52846e-06
PBANKA_1465700	fam-a protein		-1.40553	0.407498
PBANKA_1141900	DIP13 homolog, putative	DIP13	-1.40519	4.76858e-08
PBANKA_1345900	protein kinase, putative		-1.40451	1.48851e-06
PBANKA_1340600	PUA domain-containing protein		-1.40425	1.21204e-06
PBANKA_0836500	conserved rodent malaria protein, unknown function		-1.40338	0.000125139
PBANKA_0512200	protoporphyrinogen oxidase, putative	PPO	-1.40162	4.25952e-06
PBANKA_1410100	conserved Plasmodium protein, unknown function		-1.39974	8.61635e-08
PBANKA_1442600	RNA pseudouridylate synthase, putative		-1.39955	1.21883e-11
PBANKA_0910900	sporozoite surface protein essential for liver stage development	SPELD	-1.39854	2.02902e-05
PBANKA_0926800	conserved protein, unknown function		-1.39703	1.47302e-07
PBANKA_1242421	tRNA Glutamic acid		-1.39592	0.647997
PBANKA_1028700	26S proteasome regulatory subunit RPN13, putative	RPN13	-1.39512	5.86464e-09
PBANKA_0825900	conserved Plasmodium protein, unknown function		-1.39328	3.61772e-07
PBANKA_0828800	cytochrome c oxidase subunit 6B, putative	COX6B	-1.39253	4.77184e-05
PBANKA_1231900	conserved protein, unknown function		-1.39084	0.000248023
PBANKA_1124000	sphingomyelin synthase 2, putative	SMS2	-1.39047	0.000355462
PBANKA_0405310	small nucleolar RNA snoR03		-1.38896	0.0907159
PBANKA_1205100	PPPDE peptidase, putative		-1.38727	1.49835e-05
PBANKA_0110700	peptidyl-tRNA hydrolase, putative		-1.38514	6.0241e-05
PBANKA_0616400	conserved protein, unknown function		-1.38455	5.74817e-08
PBANKA_0508300	ookinete maturation gene OMG1	OMG1	-1.38447	1.11457e-09
PBANKA_1461700	conserved Plasmodium protein, unknown function		-1.3837	1.50313e-05
PBANKA_1138200	RuvB-like helicase 3, putative	RUVB3	-1.38262	1.74398e-08
PBANKA_0516000	conserved Plasmodium protein, unknown function		-1.3805	2.77796e-06
PBANKA_1407900	HORMA domain protein, putative	HOP1	-1.38005	3.19702e-08
PBANKA_0502500	pseudophosphatase PPP8, putative	PPP8	-1.37948	5.7111e-08
PBANKA_1362500	peptidase, putative		-1.37897	1.84212e-08
PBANKA_0810200	conserved Plasmodium protein, unknown function		-1.37887	1.3516e-07
PBANKA_0109900	basal complex transmembrane protein 1, putative	BTP1	-1.37816	1.00851e-07
PBANKA_0708600	quinone oxidoreductase, putative		-1.37774	1.62518e-06
PBANKA_0602900	conserved Plasmodium protein, unknown function		-1.37531	3.74058e-05
PBANKA_0940300	DEAD/DEAH box helicase, putative		-1.36848	3.02985e-06
PBANKA_1246200	fam-b protein		-1.36671	0.00409007
PBANKA_1127100	protease, putative		-1.36432	0.000113446
PBANKA_0835400	conserved Plasmodium protein, unknown function		-1.36418	2.33884e-05
PBANKA_1235800	conserved protein, unknown function		-1.36353	0.000322783
PBANKA_1204200	IMP1-like protein, putative	IMP4	-1.36188	1.60605e-09
PBANKA_0709600	conserved protein, unknown function		-1.36133	1.99837e-10
PBANKA_0402600	inner membrane complex protein 1a	IMC1a	-1.36094	0.00032022
PBANKA_0302900	MORN repeat protein, putative		-1.35767	0.000415582
PBANKA_0800300	conserved Plasmodium protein, unknown function		-1.35529	1.36965e-07
PBANKA_1243500	conserved protein, unknown function		-1.35506	6.79121e-06
PBANKA_0611200	conserved protein, unknown function		-1.35476	0.00823417
PBANKA_1130100	RNA polymerase II transcription factor B subunit 4, putative	TFB4	-1.35306	2.53613e-08
PBANKA_1349300	conserved Plasmodium protein, unknown function		-1.35243	6.31122e-05
PBANKA_1231300	major facilitator superfamily domain-containing protein, putative	MFS1	-1.35125	1.28458e-05
PBANKA_1020600	actin-related protein ARP4, putative	ARP4	-1.35073	2.74771e-09
PBANKA_0917200	RNA-binding protein s1, putative		-1.34589	3.08525e-09
PBANKA_1433700	conserved Plasmodium protein, unknown function		-1.34585	3.72173e-11
PBANKA_0810400	GDP-fucose protein O-fucosyltransferase 2	POFUT2	-1.34281	3.96165e-08
PBANKA_0609500	kinesin-X3		-1.34203	5.12434e-11
PBANKA_1446700	phenylalanine--tRNA ligase, putative		-1.34183	3.01989e-11
PBANKA_0502000	conserved Plasmodium protein, unknown function		-1.34032	3.43979e-06
PBANKA_0213700	COX assembly mitochondrial protein, putative	CMC1	-1.34024	3.00418e-08
PBANKA_1344700	apicoplast calcium binding protein 1, putative	ACBP1	-1.33972	5.01943e-08
PBANKA_0209300	actin-related protein ARP1	ARP1	-1.33971	1.86533e-08
PBANKA_1451250	conserved Plasmodium protein, unknown function		-1.33909	4.06035e-05
PBANKA_1323900	conserved protein, unknown function		-1.33873	5.10032e-06
PBANKA_1436400	conserved Plasmodium protein, unknown function		-1.33868	3.05112e-07
PBANKA_1113100	GTP-binding protein YihA1, putative		-1.33866	3.89991e-07
PBANKA_0834200	conserved Plasmodium protein, unknown function		-1.3374	6.20182e-09
PBANKA_0611300	YrhK domain-containing protein, putative		-1.33695	1.67868e-08
PBANKA_0702700	rhomboid protease ROM3	ROM3	-1.33539	5.01814e-07
PBANKA_1106500	rhomboid protease ROM4	ROM4	-1.33474	5.17523e-07
PBANKA_0103200	conserved protein, unknown function		-1.33163	2.28849e-06
PBANKA_0402500	phosphatidylethanolamine-binding protein, putative		-1.33132	1.12361e-06
PBANKA_0800100	PIR protein		-1.33019	8.63424e-05
PBANKA_1432700	DNA topoisomerase 6 subunit A, putative	SPO11	-1.32862	3.81888e-05
PBANKA_0927300	palmitoyltransferase DHHC3	DHHC3	-1.32764	1.46484e-06
PBANKA_0409700	plasmepsin VI, putative	PM6	-1.3246	4.43828e-09
PBANKA_1130600	conserved Plasmodium protein, unknown function		-1.32457	5.45441e-06
PBANKA_0204300	elongation of fatty acids protein, putative, pseudogene	ELO-C	-1.32452	2.61041e-05
PBANKA_1447600	nucleotidyltransferase, putative		-1.32275	3.30293e-07
PBANKA_1429100	conserved Plasmodium protein, unknown function		-1.32254	0.000536708
PBANKA_0303500	PH domain-containing protein, putative	PH1	-1.32216	1.00551e-05
PBANKA_1204600	heptatricopeptide repeat-containing protein, putative		-1.3198	2.72525e-06
PBANKA_0711300	conserved protein, unknown function		-1.31969	2.81901e-06
PBANKA_0508800	RAP protein, putative		-1.31805	5.59827e-09
PBANKA_1204000	conserved Plasmodium protein, unknown function		-1.31516	0.00715297
PBANKA_0712200	BEM46-like protein, putative	PBLP	-1.31335	2.67649e-07
PBANKA_0815400	protein KIC3, putative		-1.31185	0.00010004
PBANKA_1341700	conserved Plasmodium protein, unknown function		-1.31053	2.23742e-08
PBANKA_1232800	NOSIP domain-containing protein, putative		-1.30756	3.15108e-08
PBANKA_0308400	UDP-N-acetylglucosamine transferase subunit ALG14, putative	ALG14	-1.30623	7.37146e-07
PBANKA_0105700	MYND-type zinc finger protein, putative		-1.30555	3.55207e-06
PBANKA_0906000	alpha/beta hydrolase, putative		-1.30303	3.28789e-09
PBANKA_1105300	conserved Plasmodium protein, unknown function		-1.30183	2.84877e-05
PBANKA_1244900	conserved Plasmodium protein, unknown function		-1.3	7.92265e-05
PBANKA_0812600	conserved Plasmodium protein, unknown function		-1.29942	1.22745e-06
PBANKA_0922600	kelch domain-containing protein, putative		-1.29825	0.000589978
PBANKA_1245920	fam-b protein		-1.29404	0.00406464
PBANKA_1305200	serine/threonine protein kinase, putative	MARK/MELK	-1.29378	2.10802e-05
PBANKA_0929400	myosin light chain B	MLC-B	-1.29249	2.98007e-09
PBANKA_0618700	conserved Plasmodium protein, unknown function		-1.29174	0.00013162
PBANKA_1146741	PIR protein, pseudogene		-1.29144	0.239154
PBANKA_1318700	protein phosphatase PPM3	PPM3	-1.2914	0.000710251
PBANKA_0713800	NEDD8-activating enzyme E1 catalytic subunit, putative	UBA3	-1.28738	0.000343033
PBANKA_1439300	WD repeat-containing protein, putative		-1.28711	6.05192e-10
PBANKA_1128100	phospholipase	PL	-1.28503	3.52973e-05
PBANKA_0503300	conserved Plasmodium protein, unknown function		-1.28395	5.18427e-09
PBANKA_0813300	membrane protein S54	Pbs54	-1.28364	2.41188e-08
PBANKA_0410561	tRNA Isoleucine		-1.28273	0.762699
PBANKA_1122100	ferredoxin--NADP reductase, putative	FNR	-1.27913	4.37466e-07
PBANKA_0712900	high mobility group protein B2	HMGB2	-1.27841	2.61048e-05
PBANKA_1310700	glutaminyl-peptide cyclotransferase, putative		-1.27834	6.51674e-07
PBANKA_1027600	conserved protein, unknown function		-1.27822	0.000829711
PBANKA_1425200	sporozoite surface protein 3	SSP3	-1.27809	4.23613e-07
PBANKA_1020500	14-3-3 protein, putative		-1.26984	1.80728e-08
PBANKA_1316100	conserved Plasmodium protein, unknown function		-1.2692	4.15949e-08
PBANKA_1028200	atypical protein kinase, ABC-1 family, putative		-1.26907	1.60864e-06
PBANKA_1122300	MEI2-like RNA-binding protein, putative	Mei2	-1.26779	9.86839e-09
PBANKA_1464861	tRNA Glutamine		-1.26711	0.539416
PBANKA_0513100	conserved Plasmodium protein, unknown function		-1.26639	0.000410794
PBANKA_1123200	CPW-WPC family protein		-1.26552	0.000233105
PBANKA_1100400	PIR protein		-1.26505	0.245988
PBANKA_0905300	conserved Plasmodium protein, unknown function		-1.2638	1.26926e-05
PBANKA_1415400	conserved protein, unknown function		-1.26262	1.61642e-08
PBANKA_1237000	18S rRNA (guanine-N(7))-methyltransferase, putative		-1.26046	0.000125114
PBANKA_1319500	LCCL domain-containing protein	CCP2	-1.25775	7.90929e-06
PBANKA_0944041	reticulocyte binding protein, putative	Pb235	-1.25457	0.219907
PBANKA_1400900	conserved protein, unknown function		-1.25395	3.90267e-06
PBANKA_0907400	dolichol-phosphate mannosyltransferase, putative	DPM1	-1.25315	4.13633e-05
PBANKA_0317161	erythrocyte membrane antigen 1		-1.25256	0.0134121
PBANKA_1203800	DnaJ protein, putative		-1.25095	2.19609e-05
PBANKA_1224500	Dpy-19-like C-mannosyltransferase	DPY19	-1.25019	3.4183e-09
PBANKA_1417000	conserved Plasmodium protein, unknown function		-1.24902	3.72425e-05
PBANKA_0522400	steroid dehydrogenase, putative		-1.24879	6.81167e-06
PBANKA_1207800	metalloprotease, putative		-1.24618	8.58757e-07
PBANKA_1040151	fam-a protein, pseudogene		-1.24569	0.0162891
PBANKA_1304100	porphobilinogen synthase, putative	PBGS	-1.24565	2.70683e-05
PBANKA_0928000	conserved Plasmodium protein, unknown function		-1.24325	7.3904e-08
PBANKA_0816500	conserved Plasmodium protein, unknown function		-1.23972	0.0021782
PBANKA_0204600	photosensitized INA-labeled protein PHIL1	PHIL1	-1.23843	0.000240141
PBANKA_1204700	conserved Plasmodium protein, unknown function		-1.23657	0.000197195
PBANKA_0302200	dynein light chain, putative		-1.23656	0.000206307
PBANKA_1319000	conserved protein, unknown function		-1.23623	0.00015524
PBANKA_0523900	glideosome associated protein with multiple membrane spans 2, putative	GAPM2	-1.23547	9.06544e-06
PBANKA_0203400	FAD-linked sulfhydryl oxidase ERV1, putative	ERV1	-1.23531	1.30921e-07
PBANKA_1241000	ADP-ribosylation factor GTPase-activating protein 2, putative	ARFGAP2	-1.23088	3.11283e-07
PBANKA_1228700	nucleolar protein 10, putative	NOL10	-1.23073	1.02629e-05
PBANKA_1455000	S-adenosylmethionine mitochondrial carrier protein, putative	SAMC	-1.23068	4.84082e-05
PBANKA_1213100	prohibitin 2	PHB2	-1.23006	1.38771e-07
PBANKA_0903800	serine/threonine protein kinase, putative		-1.22754	9.29078e-09
PBANKA_1145721	tRNA Arginine		-1.22405	0.0279789
PBANKA_0216081	PIR protein, pseudogene		-1.22253	0.504118
PBANKA_1113700	tubulin--tyrosine ligase, putative		-1.22036	3.41769e-06
PBANKA_0926000	conserved Plasmodium protein, unknown function		-1.21745	0.0015008
PBANKA_1213300	protein KIC8, putative		-1.21464	2.06852e-07
PBANKA_1123100	SURP domain-containing protein, putative		-1.21345	7.508e-07
PBANKA_0914600	RNA (uracil-5-)methyltransferase, putative		-1.21139	7.47782e-10
PBANKA_1305700	vacuolar protein sorting-associated protein 60, putative	VPS60	-1.20956	8.54693e-07
PBANKA_1204100	conserved protein, unknown function		-1.20916	1.19785e-09
PBANKA_0912400	asparagine-rich merozoite protein ARMA, putative		-1.20733	0.000357726
PBANKA_1139800	nuclear fusion protein	GEX1	-1.20509	0.000143981
PBANKA_1026800	zinc finger protein, putative		-1.20492	8.84686e-08
PBANKA_0714000	meiotic recombination protein DMC1	DMC1	-1.20385	0.000522854
PBANKA_0709500	ATP-dependent RNA helicase DHX36, putative	DHX36	-1.20358	1.13203e-06
PBANKA_1421700	secreted ookinete protein, putative	PSOP20	-1.20137	0.00151394
PBANKA_1319100	hemolysin III, putative	HlyIII	-1.19964	4.41053e-10
PBANKA_0834500	conserved Plasmodium protein, unknown function		-1.19868	0.00022126
PBANKA_1453400	protein kinase 2	PK2	-1.19633	2.03936e-05
PBANKA_1102100	conserved Plasmodium protein, unknown function		-1.19487	1.75303e-10
PBANKA_0609250	small nucleolar RNA snoR14		-1.19393	0.257729
PBANKA_0711700	BRIX domain, putative		-1.19252	4.21478e-08
PBANKA_1205300	roadblock/LC7 domain-containing protein, putative		-1.19176	0.00031981
PBANKA_0918500	conserved Plasmodium protein, unknown function		-1.19141	7.79418e-06
PBANKA_0310700	conserved protein, unknown function		-1.19113	9.10528e-05
PBANKA_1121000	conserved Plasmodium protein, unknown function		-1.19084	3.36084e-10
PBANKA_1313100	crossover junction endonuclease MUS81, putative	MUS81	-1.18995	8.12e-09
PBANKA_1138900	conserved Plasmodium protein, unknown function		-1.18966	6.79958e-06
PBANKA_1202700	RNA-binding protein, putative		-1.1867	3.9996e-08
PBANKA_1450000	tetQ family GTPase, putative		-1.18504	9.6574e-06
PBANKA_1009200	conserved Plasmodium protein, unknown function		-1.18389	3.12898e-05
PBANKA_0405600	end-binding protein 1	EB1	-1.18356	6.21288e-06
PBANKA_0608800	conserved Plasmodium protein, unknown function		-1.18214	1.01974e-06
PBANKA_1329100	plasmepsin VIII	PM8	-1.18181	0.00559484
PBANKA_1132800	conserved Plasmodium protein, unknown function		-1.17967	4.62236e-05
PBANKA_0909800	RNA-binding protein, putative		-1.17873	0.0026123
PBANKA_0818300	conserved protein, unknown function		-1.17827	0.0128305
PBANKA_0209700	zinc-carboxypeptidase, putative		-1.17703	4.81896e-10
PBANKA_0417100	conserved protein, unknown function		-1.17128	0.000125618
PBANKA_0212600	EF hand domain-containing protein, putative		-1.17096	0.00187272
PBANKA_1225600	alpha/beta hydrolase, putative		-1.17058	2.4856e-08
PBANKA_1450900	conserved protein, unknown function		-1.16883	1.25157e-05
PBANKA_1345500	CTLH domain-containing protein, putative		-1.16838	1.67757e-10
PBANKA_0702200	translation initiation factor eIF-2B subunit alpha, putative		-1.1658	8.86587e-07
PBANKA_0837181	PIR protein		-1.16543	0.118027
PBANKA_0111700	50S ribosomal protein L18, apicoplast, putative		-1.16496	1.40059e-05
PBANKA_0515100	conserved Plasmodium protein, unknown function		-1.16227	0.000779629
PBANKA_1362800	conserved Plasmodium protein, unknown function		-1.16122	6.00828e-10
PBANKA_1112800	conserved protein, unknown function		-1.16107	6.48228e-09
PBANKA_1352100	SprT-like domain-containing protein, putative		-1.16085	2.10474e-06
PBANKA_0510100	conserved protein, unknown function		-1.15901	5.52994e-10
PBANKA_0405900	conserved Plasmodium protein, unknown function		-1.15899	1.68537e-05
PBANKA_1027200	conserved Plasmodium protein, unknown function		-1.15814	2.27987e-07
PBANKA_1218300	CPW-WPC family protein		-1.158	2.75467e-13
PBANKA_1324900	U3 small nucleolar ribonucleoprotein protein IMP3, putative	IMP3	-1.15783	2.86422e-05
PBANKA_1330200	NOC3 domain-containing protein, putative		-1.15639	0.000174055
PBANKA_1459000	ankyrin-repeat protein, putative		-1.15602	0.000379908
PBANKA_0829900	conserved protein, unknown function		-1.15339	1.25896e-08
PBANKA_0409900	heptatricopeptide repeat-containing protein, putative		-1.14781	0.000264775
PBANKA_0403100	1-cys-glutaredoxin-like protein-1, putative	GLP1	-1.1454	3.41769e-08
PBANKA_1326100	conserved Plasmodium protein, unknown function		-1.14503	0.00159818
PBANKA_1100781	PIR protein		-1.14502	0.074617
PBANKA_0606400	conserved Plasmodium protein, unknown function		-1.14499	4.96764e-06
PBANKA_1114200	ribose-5-phosphate isomerase, putative		-1.1438	0.00484934
PBANKA_0600700	conserved Plasmodium protein, unknown function		-1.14326	0.00415915
PBANKA_1022600	pantothenate kinase 1, putative	PANK1	-1.1428	7.27923e-06
PBANKA_1128900	alpha/beta hydrolase, putative		-1.1424	3.75793e-05
PBANKA_1227300	conserved Plasmodium protein, unknown function		-1.14123	3.70633e-05
PBANKA_1431200	conserved Plasmodium protein, unknown function		-1.14054	0.0388799
PBANKA_0510400	conserved protein, unknown function		-1.14032	6.19065e-06
PBANKA_1449800	inorganic pyrophosphatase, putative	VP2	-1.13938	2.14245e-05
PBANKA_0901000	fam-a protein		-1.13935	6.06213e-06
PBANKA_1340200	U6 snRNA-associated Sm-like protein LSm6, putative	LSM6	-1.13908	0.00013204
PBANKA_1459100	conserved Plasmodium protein, unknown function		-1.13867	0.000138258
PBANKA_1228000	1-cys peroxiredoxin, putative	1-CysPxn	-1.13791	1.40028e-05
PBANKA_0505200	conserved protein, unknown function		-1.13778	1.0311e-08
PBANKA_1229800	enoyl-acyl carrier reductase	FABI	-1.13751	1.24649e-06
PBANKA_0707500	RWD domain-containing protein, putative		-1.13588	1.32075e-05
PBANKA_1118300	conserved Plasmodium protein, unknown function		-1.13522	5.85139e-05
PBANKA_1314300	S-adenosylmethionine-dependent methyltransferase, putative		-1.13429	7.04073e-07
PBANKA_0812900	conserved Plasmodium protein, unknown function		-1.13373	0.000184515
PBANKA_1308100	EF-hand calcium-binding domain-containing protein, putative		-1.13313	0.00109136
PBANKA_1359500	respiratory chain complex 2 associated protein 4, putative		-1.13182	2.14962e-12
PBANKA_0502700	pre-mRNA-splicing factor RDS3, putative	RDS3	-1.13103	1.98406e-05
PBANKA_1029500	conserved Plasmodium protein, unknown function		-1.12842	0.00048761
PBANKA_1229500	endonuclease III-like protein 1, putative	NTHL1	-1.128	2.06918e-08
PBANKA_0917800	conserved oligomeric Golgi complex subunit 2, putative	COG2	-1.12396	1.53262e-07
PBANKA_1219700	glutaredoxin-like protein	GLP3	-1.1235	1.80478e-05
PBANKA_1327080	conserved Plasmodium protein, unknown function		-1.12303	0.00138823
PBANKA_0619400	V-type ATPase V0 subunit e, putative		-1.12274	0.000254663
PBANKA_1347200	nucleotidyltransferase, putative		-1.12089	3.27099e-09
PBANKA_1014500	plasmepsin IX, putative	PMIX	-1.12069	0.000645085
PBANKA_1200031	PIR protein		-1.11998	0.818994
PBANKA_1114051	tRNA Phenylalanine		-1.11997	0.401922
PBANKA_1133200	cdc2-related kinase 2	CRK2	-1.11836	1.01411e-05
PBANKA_1201700	N-terminal acetyltransferase A complex catalytic subunit ARD1, putative	ARD1	-1.11802	1.27829e-06
PBANKA_0620200	respiratory chain complex 3 associated protein 1, putative		-1.11801	8.11996e-05
PBANKA_0503800	conserved Plasmodium protein, unknown function		-1.11427	1.22284e-05
PBANKA_1342200	conserved protein, unknown function		-1.11415	0.00540362
PBANKA_0815100	conserved Plasmodium protein, unknown function		-1.11343	0.000162397
PBANKA_0904000	conserved Plasmodium protein, unknown function		-1.11287	2.14461e-05
PBANKA_0830700	procollagen lysine 5-dioxygenase, putative		-1.11285	0.000114918
PBANKA_0818200	conserved protein, unknown function		-1.11114	0.000394946
PBANKA_1225300	zinc finger protein, putative		-1.11105	2.86483e-05
PBANKA_0309500	secreted protein with altered thrombospondin repeat domain	SPATR	-1.11023	0.0125093
PBANKA_0600071	conserved rodent malaria protein, unknown function		-1.1099	0.248032
PBANKA_1350400	conserved protein, unknown function		-1.10846	4.87449e-05
PBANKA_0816700	cytochrome c oxidase subunit ApiCOX30, putative		-1.10821	2.82107e-05
PBANKA_1140900	ribosomal protein S17, mitochondrial, putative	mtRPS17	-1.10768	3.204e-05
PBANKA_1134600	rhomboid protease ROM7	ROM7	-1.10737	0.00438237
PBANKA_0112400	cytosolic Fe-S cluster assembly factor NAR1, putative	NAR1	-1.10702	1.41109e-05
PBANKA_0823100	S-adenosylmethionine synthetase, putative	SAMS	-1.10677	0.0017636
PBANKA_1201300	conserved Plasmodium protein, unknown function		-1.10542	3.40448e-05
PBANKA_0521500	conserved Plasmodium protein, unknown function		-1.10522	2.08973e-07
PBANKA_1439000	conserved protein, unknown function		-1.10403	3.59911e-06
PBANKA_1361400	conserved Plasmodium protein, unknown function		-1.10349	0.00136486
PBANKA_0921700	conserved Plasmodium protein, unknown function	ATG23	-1.10336	1.84466e-10
PBANKA_1039000	radial spoke protein 3, putative		-1.1022	1.09958e-05
PBANKA_0110100	conserved Plasmodium protein, unknown function		-1.10214	2.11276e-07
PBANKA_1115000	conserved protein, unknown function		-1.10153	0.000816445
PBANKA_0907000	heptatricopeptide repeat-containing protein, putative		-1.10034	2.32816e-08
PBANKA_1207400	conserved Plasmodium protein, unknown function		-1.09989	1.77883e-05
PBANKA_1409200	PhIL1-interacting candidate PIC5, putative		-1.09909	1.47428e-05
PBANKA_0619600	protein pelota homolog, putative	PELO	-1.09773	6.2483e-07
PBANKA_1110900	conserved Plasmodium protein, unknown function		-1.09756	0.00135099
PBANKA_0616500	translation machinery-associated protein, putative		-1.09602	1.53735e-07
PBANKA_0911500	apical exonemal protein, putative	AEP	-1.09397	3.59577e-07
PBANKA_1429200	kelch domain-containing protein, putative	S20	-1.09354	7.2551e-07
PBANKA_0700081	PIR protein		-1.09228	0.0570613
PBANKA_1336800	conserved Plasmodium protein, unknown function		-1.09141	0.000469234
PBANKA_1018100	ABC transporter G family member 2	ABCG2	-1.08774	0.000217403
PBANKA_0514800	calmodulin, putative		-1.08717	0.000240619
PBANKA_1443700	conserved protein, unknown function		-1.08674	1.44093e-05
PBANKA_1124400	conserved Plasmodium protein, unknown function		-1.08332	0.00505989
PBANKA_0818100	N-glycosylase/DNA lyase, putative	OGG1	-1.08181	7.2699e-08
PBANKA_0904200	conserved Plasmodium protein, unknown function		-1.08154	6.30813e-12
PBANKA_0101800	SDE2 domain-containing protein, putative		-1.08132	3.89451e-06
PBANKA_1036200	RNA-binding protein 8A, putative	RBM8A	-1.07943	4.15152e-06
PBANKA_0212500	SDH5 domain-containing protein, putative		-1.07841	9.467e-07
PBANKA_1458500	NEDD8-conjugating enzyme UBC12, putative	UBC12	-1.07623	0.000674532
PBANKA_0717600	GTP:AMP phosphotransferase, putative	GAK	-1.07583	3.45624e-07
PBANKA_1421500	conserved Plasmodium protein, unknown function		-1.07237	5.77408e-07
PBANKA_0303000	conserved Plasmodium protein, unknown function		-1.07166	0.00085941
PBANKA_1028800	DnaJ protein, putative		-1.07164	2.23259e-05
PBANKA_0821300	conserved Plasmodium protein, unknown function		-1.07068	0.00485771
PBANKA_1126800	HECT domain-containing protein 1, putative	HECT1	-1.06964	1.61015e-08
PBANKA_0403400	conserved protein, unknown function		-1.0689	0.000271811
PBANKA_1109100	ERCC4 domain-containing protein, putative		-1.06857	4.556e-05
PBANKA_1309750	U5 spliceosomal RNA		-1.0683	0.0699199
PBANKA_0835000	conserved protein, unknown function		-1.06815	1.96021e-05
PBANKA_0801100	conserved Plasmodium protein, unknown function		-1.06745	1.13191e-06
PBANKA_0308700	pseudouridine synthase, putative		-1.06732	0.000317938
PBANKA_1334200	RNA 3'-terminal phosphate cyclase-like protein, putative	RCL1	-1.06711	0.00159195
PBANKA_1227600	adenylyl cyclase beta, putative	ACbeta	-1.06708	5.80158e-05
PBANKA_0603650	conserved Plasmodium protein, unknown function		-1.06634	0.00466385
PBANKA_0202600	conserved protein, unknown function		-1.06606	0.00433414
PBANKA_0941200	tRNA-splicing ligase RtcB, putative	RTCB	-1.06597	1.21157e-05
PBANKA_1309800	conserved Plasmodium protein, unknown function		-1.06583	9.23913e-09
PBANKA_1448600	conserved Plasmodium protein, unknown function		-1.06434	6.0241e-05
PBANKA_1461000	methyltransferase, putative		-1.06359	7.86202e-05
PBANKA_1117300	conserved Plasmodium protein, unknown function		-1.0634	2.18629e-07
PBANKA_1330100	60S ribosome subunit biogenesis protein NIP7, putative	NIP7	-1.06207	7.48694e-05
PBANKA_1034000	conserved Plasmodium protein, unknown function		-1.06088	0.00127357
PBANKA_1362700	conserved Plasmodium protein, unknown function		-1.06084	0.0016271
PBANKA_0700500	fam-a protein		-1.05886	0.735492
PBANKA_1012600	importin, putative		-1.05857	0.000146014
PBANKA_1135800	conserved Plasmodium protein, unknown function		-1.05766	4.31604e-07
PBANKA_1114500	conserved Plasmodium protein, unknown function		-1.05728	0.000990255
PBANKA_0607000	conserved Plasmodium protein, unknown function		-1.05699	1.97757e-07
PBANKA_0620400	conserved protein, unknown function		-1.0563	7.42518e-06
PBANKA_0827300	tetratricopeptide repeat protein, putative		-1.0554	1.1899e-06
PBANKA_1404300	conserved Plasmodium protein, unknown function		-1.05521	9.23203e-05
PBANKA_1407500	conserved protein, unknown function		-1.05514	0.000242908
PBANKA_1300900	cytochrome c oxidase assembly protein COX11, putative	COX11	-1.05475	2.04857e-05
PBANKA_0938100	tetratricopeptide repeat protein, putative		-1.05457	0.00308453
PBANKA_0901900	tubulin--tyrosine ligase, putative		-1.05455	7.64788e-05
PBANKA_1351351	tRNA Serine		-1.05423	0.0672797
PBANKA_1432600	conserved protein, unknown function		-1.05337	3.67765e-05
PBANKA_1352600	serine/threonine protein kinase, putative		-1.05237	2.65757e-06
PBANKA_1029700	ubiquitin-conjugating enzyme E2, putative		-1.05016	2.55664e-05
PBANKA_0407300	OMD protein	OMD	-1.04982	0.000270923
PBANKA_1222700	conserved Plasmodium protein, unknown function		-1.04861	0.000159703
PBANKA_0301100	conserved Plasmodium protein, unknown function		-1.04202	2.06852e-07
PBANKA_1133100	aurora-related kinase ARK3, putative	ARK3	-1.04169	1.28458e-05
PBANKA_1103900	conserved Plasmodium protein, unknown function		-1.04163	5.02692e-06
PBANKA_1418900	ras-related protein Rab-11A	Rab11a	-1.03902	6.16138e-05
PBANKA_1416000	conserved protein, unknown function		-1.03879	1.32158e-05
PBANKA_1106800	subtilisin-like protease 3, putative	SUB3	-1.03863	4.02274e-07
PBANKA_1364700	GTP-binding protein, putative		-1.03834	2.19211e-05
PBANKA_0938800	conserved Plasmodium protein, unknown function		-1.03777	2.99287e-07
PBANKA_0207900	conserved Plasmodium protein, unknown function		-1.03557	0.00151728
PBANKA_0909500	AAA family ATPase, putative		-1.03535	2.69394e-05
PBANKA_0932500	histone-lysine N-methyltransferase SET7, putative	SET7	-1.03506	0.00559498
PBANKA_1233500	mRNA-binding protein PUF1	PUF1	-1.03436	4.39239e-08
PBANKA_0836941	fam-b protein		-1.03421	0.483799
PBANKA_1206800	zinc finger (CCCH type) protein, putative		-1.03354	0.091943
PBANKA_0413800	microneme associated antigen, putative	MA	-1.0332	0.000527327
PBANKA_0914900	conserved protein, unknown function		-1.03266	5.78308e-05
PBANKA_1434400	secreted ookinete protein, putative	PSOP17	-1.0315	0.000155019
PBANKA_1319700	AP2 domain transcription factor AP2-HC, putative	ApiAP2	-1.03127	2.19916e-05
PBANKA_1334800	apical polar ring protein APR2, putative	37347	-1.03098	0.000129705
PBANKA_0910600	ubiquitin-related modifier 1, putative	URM1	-1.03083	0.000510008
PBANKA_0832500	PIH1 domain-containing protein, putative		-1.0308	1.82462e-05
PBANKA_1414900	SAS6-like protein	SAS6L	-1.02758	1.13893e-05
PBANKA_1138600	conserved protein, unknown function		-1.02662	0.00298406
PBANKA_0205100	mitochondrial carrier protein, putative		-1.02618	0.000788253
PBANKA_0408100	50S ribosomal protein L9, apicoplast, putative		-1.02532	2.99967e-08
PBANKA_0917300	conserved Plasmodium protein, unknown function		-1.02425	4.33097e-05
PBANKA_1360800	conserved Plasmodium protein, unknown function		-1.02348	0.000129757
PBANKA_1012700	conserved Plasmodium protein, unknown function		-1.02301	1.02397e-05
PBANKA_0414300	kinetochore protein NUF2, putative	NUF2	-1.02236	6.07457e-08
PBANKA_1243000	palmitoyltransferase DHHC7	DHHC7	-1.02223	3.84398e-05
PBANKA_0825700	telomeric repeat binding factor 1, putative	TRF1	-1.02204	2.59963e-05
PBANKA_0403700	GRIP domain-containing protein, putative		-1.02039	4.71762e-09
PBANKA_0307800	conserved Plasmodium protein, unknown function		-1.01984	4.39692e-05
PBANKA_1102900	cell division control protein 6, putative	CDC6	-1.01899	1.75248e-05
PBANKA_1141400	DNA topoisomerase 6 subunit B, putative	TOP6B	-1.01455	5.17123e-06
PBANKA_1225700	GTPase-activating protein, putative		-1.01367	2.99997e-09
PBANKA_0415900	conserved protein, unknown function		-1.01366	0.00644542
PBANKA_1026900	ribosomal RNA small subunit methyltransferase A1, putative	KsgA1	-1.01232	4.31604e-07
PBANKA_0825200	thiamine pyrophosphokinase, putative	TPK	-1.01229	0.00120735
PBANKA_0300700	nucleic acid-binding protein, putative		-1.01188	4.16559e-08
PBANKA_1361000	step II splicing factor, putative		-1.01154	6.20172e-06
PBANKA_0904600	conserved Plasmodium protein, unknown function		-1.01023	2.8518e-06
PBANKA_0619500	conserved Plasmodium protein, unknown function		-1.00723	8.47947e-06
PBANKA_0512400	rRNA-processing protein EBP2, putative	EBP2	-1.00611	1.34682e-05
PBANKA_0936000	endonuclease/exonuclease/phosphatase family protein, putative		-1.0056	2.64771e-06
PBANKA_0317101	PIR protein		-1.00541	0.345817
PBANKA_0514000	transcription elongation factor SPT4, putative	SPT4	-1.00513	1.03111e-05
PBANKA_0905400	conserved Plasmodium protein, unknown function		-1.00453	0.000109825
PBANKA_1325800	conserved Plasmodium protein, unknown function		-1.00251	0.0100033
PBANKA_0929700	haloacid dehalogenase-like hydrolase, putative		-1.0018	6.47609e-05
PBANKA_1243300	peptidyl-prolyl cis-trans isomerase, putative	CYP23	-1.00142	0.00108231
PBANKA_1206000	conserved Plasmodium protein, unknown function		-0.999444	2.87707e-06
PBANKA_0908400	conserved Plasmodium protein, unknown function		-0.997356	8.16152e-06
PBANKA_0833900	conserved Plasmodium protein, unknown function		-0.996494	0.000141794
PBANKA_1134900	zinc finger protein	Pb103	-0.994844	0.0151238
PBANKA_1226470	C/D small nucleolar RNA		-0.994299	0.0698287
PBANKA_0919400	conserved protein, unknown function		-0.993548	8.27147e-05
PBANKA_1107800	ceramide synthase CERS1, putative		-0.993186	4.32426e-06
PBANKA_1409300	tetratricopeptide repeat protein, putative		-0.992952	6.18437e-05
PBANKA_0314800	conserved protein, unknown function		-0.992856	0.00796106
PBANKA_1353900	inner centromere protein, putative		-0.989321	9.65967e-08
PBANKA_1460500	serine/threonine protein kinase, putative		-0.98924	2.04506e-05
PBANKA_1342000	Qa-SNARE protein, putative		-0.989204	2.15556e-05
PBANKA_0514200	claudin-like apicomplexan microneme protein	CLAMP	-0.989052	0.0105542
PBANKA_1032400	alpha/beta hydrolase, putative		-0.988887	0.000540499
PBANKA_1203900	peptidase, putative		-0.98867	1.6188e-05
PBANKA_1449600	PIH1 domain-containing protein, putative	PIH1	-0.988002	0.00155251
PBANKA_0821600	CRAL/TRIO domain-containing protein, putative		-0.987676	0.000159252
PBANKA_0908700	P-loop containing nucleoside triphosphate hydrolase, putative		-0.985588	0.000231551
PBANKA_1328800	conserved protein, unknown function		-0.985517	1.05418e-05
PBANKA_0710200	conserved protein, unknown function		-0.98396	0.000447998
PBANKA_0915900	amino acid transporter, putative		-0.983102	0.000238695
PBANKA_1125800	conserved Plasmodium protein, unknown function		-0.981802	0.0106341
PBANKA_0620600	protein CPH1, putative	CPH1	-0.981669	2.30984e-05
PBANKA_1452700	conserved Plasmodium protein, unknown function		-0.98137	0.00301657
PBANKA_0929200	conserved protein, unknown function		-0.980697	0.000109895
PBANKA_0504300	flagellar outer arm dynein-associated protein, putative		-0.979824	0.00125989
PBANKA_0302300	aspartate aminotransferase, putative	AspAT	-0.979773	0.000626914
PBANKA_0214531	tRNA Threonine		-0.979643	0.264124
PBANKA_0104100	aurora-related kinase ARK1, putative	ARK1	-0.978015	0.000808629
PBANKA_0942800	syntaxin, putative		-0.977686	0.000305178
PBANKA_0606700	cysteine repeat modular protein 3	CRMP3	-0.976305	0.00103714
PBANKA_1354800	conserved Plasmodium protein, unknown function		-0.976248	2.85847e-05
PBANKA_1240400	RNA methyltransferase, putative		-0.976048	0.000175618
PBANKA_1037900	conserved Plasmodium protein, unknown function		-0.975758	0.0170908
PBANKA_0300400	PIR protein, pseudogene		-0.975602	0.838393
PBANKA_1303900	conserved Plasmodium protein, unknown function		-0.973958	0.000438933
PBANKA_1236900	transcription initiation factor TFIID subunit 10, putative	TAF10	-0.972855	3.29094e-05
PBANKA_1034200	conserved Plasmodium protein, unknown function		-0.972126	0.0198954
PBANKA_0504000	tRNA-specific 2-thiouridylase MnmA, putative		-0.970861	3.92165e-05
PBANKA_0600081	PIR protein		-0.970602	0.19984
PBANKA_0716100	conserved Plasmodium protein, unknown function		-0.969985	0.00194785
PBANKA_1413000	transmembrane emp24 domain-containing protein, putative		-0.967874	1.09379e-06
PBANKA_0902100	sporozoite and liver stage asparagine-rich protein	SLARP	-0.963147	0.00831671
PBANKA_0201900	mitochondrial distribution and morphology protein, putative		-0.963128	0.00011892
PBANKA_0941700	WD repeat-containing protein WRAP73, putative	WDR8	-0.962596	0.00297366
PBANKA_0213500	ribosome biogenesis protein BRX1, putative		-0.961788	4.269e-06
PBANKA_1222500	plasmepsin X, putative	PMX	-0.961665	1.18314e-05
PBANKA_1212500	merozoite surface protein MSA180, putative	MSA180	-0.960794	0.00913226
PBANKA_1105200	BCNT domain-containing protein, putative		-0.959906	5.20527e-06
PBANKA_1216300	conserved protein, unknown function		-0.959246	9.50795e-07
PBANKA_0415700	autophagy-related protein 3, putative	ATG3	-0.958371	5.21888e-07
PBANKA_0608500	SNARE protein, putative		-0.957797	9.01509e-06
PBANKA_0831100	zinc finger protein, putative		-0.957195	1.2253e-06
PBANKA_0208400	major facilitator superfamily-related transporter, putative	MFR2	-0.956407	1.59418e-06
PBANKA_1343700	conserved Plasmodium protein, unknown function		-0.956286	0.000177279
PBANKA_0712400	rRNA-processing protein FCF1, putative	FCF1	-0.956265	0.0011523
PBANKA_0704400	alpha/beta hydrolase, putative		-0.953738	2.17828e-06
PBANKA_0837001	PIR protein		-0.953139	0.218197
PBANKA_0604400	targeted glyoxalase II, putative	tGLO2	-0.952481	0.000236713
PBANKA_0906600	coproporphyrinogen-III oxidase, putative	CPO	-0.952005	1.69741e-05
PBANKA_0923600	GrpE protein homolog, mitochondrial, putative	MGE1	-0.94894	7.68117e-05
PBANKA_1035400	glideosome associated protein with multiple membrane spans 3, putative	GAPM3	-0.948626	0.000665423
PBANKA_1232400	F-actin-capping protein subunit beta	CPbeta	-0.947048	0.000240619
PBANKA_0834800	histidine--tRNA ligase, putative		-0.946764	1.68253e-06
PBANKA_0504100	autophagy-related protein 8	ATG8	-0.946616	0.00995946
PBANKA_0406400	zinc finger protein, putative		-0.9456	8.92765e-07
PBANKA_1026700	conserved Plasmodium protein, unknown function		-0.945074	0.00300069
PBANKA_1008900	conserved Plasmodium protein, unknown function		-0.944316	8.42278e-05
PBANKA_0602100	conserved Plasmodium protein, unknown function		-0.943819	6.413e-08
PBANKA_1232300	UTP--glucose-1-phosphate uridylyltransferase, putative		-0.94353	2.99407e-05
PBANKA_1422300	FAD-dependent monooxygenase, putative		-0.942365	0.00280655
PBANKA_0929100	acyl-CoA-binding protein, putative		-0.941974	2.46874e-05
PBANKA_1115600	conserved Plasmodium protein, unknown function		-0.941508	4.25714e-05
PBANKA_0605900	conserved Plasmodium protein, unknown function		-0.941454	0.000108943
PBANKA_1429500	DNA-directed RNA polymerases I, II, and III subunit RPABC3, putative	RPB8	-0.941289	7.34195e-05
PBANKA_1317800	tRNA intron endonuclease, putative		-0.939395	0.00125989
PBANKA_1406000	conserved Plasmodium protein, unknown function		-0.938969	0.00158092
PBANKA_0202100	conserved protein, unknown function		-0.938838	0.420038
PBANKA_1100700	fam-a protein		-0.938787	0.582962
PBANKA_0813600	conserved Plasmodium protein, unknown function		-0.93736	0.000606095
PBANKA_1361300	TBC domain protein, putative		-0.936794	3.54484e-05
PBANKA_1416200	conserved Plasmodium protein, unknown function		-0.935861	0.000885346
PBANKA_0939100	AP2 domain transcription factor AP2-P, putative	ApiAP2	-0.935551	9.48044e-07
PBANKA_0622000	conserved Plasmodium protein, unknown function		-0.934029	0.00151954
PBANKA_0902600	leucine-rich repeat protein	LRR10	-0.933381	0.06368
PBANKA_1202800	apicomplexan kinetochore protein 2	AKIT2	-0.932305	2.61041e-05
PBANKA_1019800	calcium-dependent protein kinase, putative		-0.931838	0.0179611
PBANKA_0505700	ATP-dependent RNA helicase ROK1, putative	ROK1	-0.93176	1.77402e-08
PBANKA_1459400	clathrin adaptor domain-containing protein, putative		-0.931072	4.21646e-07
PBANKA_0939400	prefoldin, putative		-0.930653	1.22906e-05
PBANKA_0811900	cytosolic Fe-S cluster assembly factor NBP35, putative	NBP35	-0.92957	0.00964743
PBANKA_1143500	ribosome biogenesis protein MRT4, putative		-0.927086	3.66707e-05
PBANKA_0721100	dynein regulatory complex protein, putative		-0.926996	0.000233291
PBANKA_1012400	RNA methyltransferase, putative		-0.926639	2.99771e-05
PBANKA_0940000	conserved Plasmodium protein, unknown function		-0.925152	0.00192805
PBANKA_1347800	20 kDa chaperonin, putative	CPN20	-0.92475	4.41833e-07
PBANKA_0612841	tRNA Alanine		-0.924701	0.633504
PBANKA_0927500	conserved Plasmodium protein, unknown function		-0.924688	0.000220236
PBANKA_1227500	conserved Plasmodium protein, unknown function		-0.923586	0.000790793
PBANKA_1361800	conserved Plasmodium protein, unknown function		-0.921614	3.45392e-05
PBANKA_1453000	conserved Plasmodium protein, unknown function		-0.921368	9.935e-05
PBANKA_1400100	PIR protein		-0.921365	0.029433
PBANKA_0825800	conserved Plasmodium protein, unknown function		-0.921212	0.00461819
PBANKA_1002500	sporozoite-specific protein S10	S10	-0.920969	5.32404e-06
PBANKA_1415200	conserved protein, unknown function		-0.920401	0.00164089
PBANKA_1445600	serine/threonine protein kinase RIO1, putative	RIO1	-0.920102	0.0124253
PBANKA_0918600	phosphatidylinositol-4-phosphate 5-kinase, putative		-0.919834	8.04482e-07
PBANKA_0317141	fam-a protein		-0.919257	0.00249985
PBANKA_1141000	conserved protein, unknown function		-0.919146	0.000843138
PBANKA_1421400	C-Myc-binding protein, putative	MYCBP	-0.919135	0.00415915
PBANKA_1111700	conserved protein, unknown function		-0.918053	7.17684e-05
PBANKA_0807800	DNA replication complex GINS protein, putative		-0.917824	8.73812e-06
PBANKA_0204500	LCCL domain-containing protein, putative	CCp5	-0.917799	1.97757e-07
PBANKA_0600051	PIR protein		-0.917605	0.0178456
PBANKA_1020000	conserved Plasmodium protein, unknown function		-0.917575	0.000199459
PBANKA_0103400	glyoxalase I-like protein GILP, putative	GILP	-0.917562	3.35301e-05
PBANKA_1343800	transcriptional regulatory protein sir2a	Sir2A	-0.916821	2.57382e-05
PBANKA_0809800	ribosomal RNA methyltransferase, putative		-0.916719	0.000109895
PBANKA_0507900	conserved Plasmodium protein, unknown function		-0.916656	0.0164971
PBANKA_1354200	mitochondrial pyruvate carrier protein 1, putative	MPC1	-0.91616	4.70304e-05
PBANKA_0719700	conserved Plasmodium protein, unknown function		-0.916056	1.98598e-05
PBANKA_0902000	dynein light chain, putative		-0.915017	0.0211697
PBANKA_1026300	conserved protein, unknown function		-0.914808	2.89436e-05
PBANKA_0927700	DDRGK domain-containing protein, putative		-0.914301	0.000275936
PBANKA_0600400	fam-a protein		-0.914197	0.000553012
PBANKA_1339600	PRELI domain-containing protein, putative	PRELID	-0.913722	2.65371e-05
PBANKA_0922200	autophagy-related protein 7, putative	ATG7	-0.912662	0.000122678
PBANKA_1237200	50S ribosomal protein L17, apicoplast, putative	RPL17	-0.911833	0.000285062
PBANKA_1012500	leucine-rich repeat protein	LRR5	-0.911751	0.000493343
PBANKA_0214521	tRNA Valine		-0.911282	0.523806
PBANKA_0800800	cytosolic iron-sulfur assembly component 2, putative	CIA2	-0.910974	0.00102986
PBANKA_0711500	conserved Plasmodium protein, unknown function		-0.910297	0.00803665
PBANKA_1040100	choline kinase	CK	-0.90982	0.016146
PBANKA_1318200	iron-sulfur cluster assembly protein ISCU, putative	ISCU	-0.908346	0.000122357
PBANKA_1219200	cytochrome c oxidase subunit 4, putative	COX4	-0.906708	0.00011048
PBANKA_0821000	chaperone, putative		-0.905531	0.000299708
PBANKA_1456300	mitochondrial import inner membrane translocase subunit TIM13, putative	TIM13	-0.9044	0.000164868
PBANKA_0820100	PPPDE peptidase, putative		-0.903139	0.000564938
PBANKA_1312600	mitochondrial respiratory chain complex II subunit, putative		-0.901985	0.000143981
PBANKA_1352200	conserved Plasmodium protein, unknown function		-0.900784	0.0027238
PBANKA_1359600	6-cysteine protein P48/45	P48/45	-0.900638	0.00230188
PBANKA_1242100	methionine aminopeptidase 1a, putative	METAP1a	-0.90059	0.000353753
PBANKA_1013900	PhIL1 interacting protein PIP3, putative	PIP3	-0.900532	0.00430162
PBANKA_0508700	conserved Plasmodium protein, unknown function		-0.900425	8.3218e-06
PBANKA_1466161	PIR protein		-0.899331	0.407124
PBANKA_0719900	cdc2-related protein kinase 1	CRK1	-0.899183	2.8275e-06
PBANKA_0402400	IBR domain protein, putative		-0.898195	0.000412877
PBANKA_0515200	MORN repeat-containing protein 1, putative	MORN1	-0.897353	2.82107e-05
PBANKA_0832400	conserved protein, unknown function		-0.896762	0.00302763
PBANKA_0721500	conserved Plasmodium protein, unknown function		-0.896663	0.000156196
PBANKA_0621000	dynactin subunit 5, putative		-0.895561	0.00023729
PBANKA_1340700	mitochondrial fission 1 protein, putative	FIS1	-0.895226	4.55069e-05
PBANKA_0709200	polyribonucleotide 5'-hydroxyl-kinase Clp1, putative	CLP1	-0.894584	0.000317272
PBANKA_1451900	conserved Plasmodium protein, unknown function		-0.89453	0.0402976
PBANKA_1302700	male development protein MD1	MD1	-0.894367	0.000802305
PBANKA_0313700	conserved Plasmodium membrane protein, unknown function		-0.893451	0.000674575
PBANKA_0209600	conserved Plasmodium protein, unknown function		-0.893102	0.00161321
PBANKA_0611000	trafficking protein particle complex subunit 5, putative		-0.893096	0.000319035
PBANKA_1233200	cyclin	CYC3	-0.891963	0.000829711
PBANKA_1436300	conserved Plasmodium protein, unknown function		-0.890728	4.77184e-05
PBANKA_0600091	fam-c protein		-0.889246	0.380046
PBANKA_0613500	conserved Plasmodium protein, unknown function		-0.885647	2.58603e-05
PBANKA_0305900	protein P22	Pb22	-0.88502	0.000922883
PBANKA_1227000	filament assembling protein, putative		-0.884481	0.000437621
PBANKA_0111100	6-cysteine protein P12p, putative	P12p	-0.883476	0.00164871
PBANKA_0927400	heat shock factor-binding protein 1, putative	HSBP	-0.880261	0.000877378
PBANKA_1338000	respiratory chain complex 2 associated protein 2, putative		-0.879827	0.00119823
PBANKA_1230600	conserved oligomeric Golgi complex subunit 4, putative	COG4	-0.879091	0.00154149
PBANKA_0513500	conserved Plasmodium protein, unknown function		-0.878763	0.0292777
PBANKA_1129200	conserved Plasmodium protein, unknown function		-0.878227	0.00129495
PBANKA_1312300	SNARE protein, putative		-0.877251	0.000353261
PBANKA_0825400	conserved Plasmodium protein, unknown function		-0.877229	0.000384524
PBANKA_0312800	conserved Plasmodium protein, unknown function		-0.876832	6.30479e-05
PBANKA_1121400	RNA methyltransferase, putative		-0.87598	7.25099e-06
PBANKA_1104100	MOLO1 domain-containing protein, putative	TPM2	-0.875607	0.00834595
PBANKA_0920500	conserved Plasmodium protein, unknown function		-0.875357	0.000269876
PBANKA_0823300	para-aminobenzoic acid synthetase, putative		-0.874565	0.000483439
PBANKA_1347300	SAM-dependent RNA methyltransferase, putative		-0.874233	0.000270923
PBANKA_1209400	inner membrane complex sub-compartment protein 1	ISP1	-0.87353	0.00115333
PBANKA_1421600	calcium/calmodulin-dependent protein kinase, putative		-0.873234	0.00100731
PBANKA_0826800	protein kinase, putative		-0.87221	8.4739e-07
PBANKA_0911100	conserved Plasmodium protein, unknown function		-0.871633	0.0146198
PBANKA_0705600	conserved Plasmodium protein, unknown function		-0.87017	0.00383916
PBANKA_0518000	ribosomal protein L27, putative	RPL27	-0.870125	4.87449e-05
PBANKA_1441000	haloacid dehalogenase-like hydrolase, putative	HAD3	-0.869367	0.00334907
PBANKA_1352900	ribosomal protein L49, mitochondrial, putative		-0.869304	9.88911e-05
PBANKA_1123300	conserved protein, unknown function		-0.868817	9.95983e-05
PBANKA_1003200	conserved Plasmodium protein, unknown function		-0.868624	0.00119149
PBANKA_0213000	RNA-binding protein, putative		-0.868319	2.5359e-06
PBANKA_0617500	exosome complex component CSL4, putative	CSL4	-0.865869	4.35398e-05
PBANKA_0701900	GPI-anchored micronemal antigen	GAMA	-0.862803	0.0604195
PBANKA_0201200	fam-a protein, pseudogene		-0.862796	0.226443
PBANKA_1036700	COBW domain-containing protein 1, putative	CBWD1	-0.862691	0.00120201
PBANKA_1131851	tRNA Threonine		-0.862058	0.566249
PBANKA_0506300	methyltransferase, putative		-0.861557	0.000777984
PBANKA_1311200	conserved Plasmodium protein, unknown function		-0.861073	0.00891468
PBANKA_1337700	conserved Plasmodium protein, unknown function		-0.859665	0.00015534
PBANKA_1024300	ATP-dependent RNA helicase DBP4, putative	DBP4	-0.859456	0.000150042
PBANKA_0104000	acylphosphatase, putative		-0.85934	7.6322e-05
PBANKA_1433200	anaphase-promoting complex subunit 10, putative	APC10	-0.858797	6.16138e-05
PBANKA_1203450	conserved Plasmodium protein, unknown function		-0.858213	0.000362711
PBANKA_0903100	conserved Plasmodium protein, unknown function		-0.856898	0.00250162
PBANKA_1024371	tRNA Proline		-0.855002	0.812577
PBANKA_1325700	thioredoxin-like protein	TLP1	-0.853855	0.0165003
PBANKA_0836981	PIR protein		-0.853499	0.439152
PBANKA_1142700	phosphatidylserine synthase, putative	PSS	-0.852169	5.0727e-05
PBANKA_0708500	phosphorylated CTD interacting factor 1 WW domain-containing protein, putative		-0.851966	0.000775638
PBANKA_0800061	PIR protein		-0.851587	0.302314
PBANKA_1237800	multidrug resistance protein 1, putative	MDR1	-0.85157	3.83746e-06
PBANKA_0208500	conserved Plasmodium protein, unknown function		-0.851235	0.00269732
PBANKA_1327000	DNA-directed RNA polymerase III subunit RPC4, putative		-0.850958	0.000367158
PBANKA_1021200	conserved Plasmodium protein, unknown function		-0.8505	0.000381546
PBANKA_0307200	monocarboxylate transporter, putative		-0.848814	0.00241951
PBANKA_1336900	conserved Plasmodium protein, unknown function		-0.845704	0.00080209
PBANKA_1430200	ER membrane protein complex subunit 6, putative	EMC6	-0.845695	0.00823417
PBANKA_0926900	WD repeat-containing protein, putative		-0.844608	0.000232123
PBANKA_0702300	mitochondrial inner membrane protein OXA1, putative	OXA1	-0.84048	0.000731527
PBANKA_0108700	RNA-binding protein 25, putative	RBM25	-0.84044	0.0034564
PBANKA_0522200	conserved Plasmodium protein, unknown function		-0.840143	0.0171704
PBANKA_1123700	conserved Plasmodium protein, unknown function		-0.839916	0.0172563
PBANKA_0921000	conserved Plasmodium protein, unknown function		-0.839609	0.0186777
PBANKA_0413400	male development protein MD3	MD3	-0.838926	0.0036723
PBANKA_1137500	actin-depolymerizing factor 2	ADF2	-0.838726	0.0144888
PBANKA_1435200	female development protein FD4	FD4	-0.838364	0.00606482
PBANKA_1440400	small subunit rRNA processing factor, putative		-0.838283	0.047537
PBANKA_1333100	protein MGET, putative		-0.837814	0.00144672
PBANKA_0304600	iron-sulfur assembly protein, putative	ISCA1	-0.837008	0.00116844
PBANKA_1364900	U3 small nucleolar RNA-associated protein 15, putative	UTP15	-0.836402	0.00741165
PBANKA_1325900	conserved protein, unknown function		-0.835632	0.000892132
PBANKA_1136700	guanylyl cyclase beta	GCbeta	-0.83515	9.43509e-07
PBANKA_1312400	HSP20-like chaperone, putative		-0.834364	7.25235e-05
PBANKA_1208900	ankyrin-repeat protein, putative		-0.834316	0.0589281
PBANKA_1121500	cytochrome b-c1 complex subunit 9, putative	QCR9	-0.834052	0.000173435
PBANKA_1245500	conserved Plasmodium protein, unknown function		-0.833825	9.2472e-06
PBANKA_0501700	phosphomannomutase, putative	HAD5	-0.832712	3.23945e-05
PBANKA_0713600	conserved protein, unknown function		-0.832096	0.0003729
PBANKA_1347500	ATP-dependent RNA helicase DBP8, putative	DBP8	-0.831796	0.000737418
PBANKA_1027000	serine palmitoyltransferase, putative	SPT	-0.831611	0.000584619
PBANKA_0310600	conserved protein, unknown function		-0.831283	0.000876799
PBANKA_0718500	repressor of RNA polymerase III transcription MAF1, putative	MAF1	-0.830845	0.00302464
PBANKA_1021800	mitochondrial import inner membrane translocase subunit TIM8, putative	TIM8	-0.829707	0.160071
PBANKA_0516100	conserved protein, unknown function		-0.829665	0.000429943
PBANKA_0616200	conserved Plasmodium protein, unknown function		-0.82852	0.00959709
PBANKA_1205200	transmembrane protein 147, putative	TMEM147	-0.828281	0.013008
PBANKA_0931100	conserved protein, unknown function		-0.82714	9.48784e-05
PBANKA_0111400	conserved Plasmodium protein, unknown function		-0.826285	0.00770458
PBANKA_0939700	vacuolar fusion protein CCZ1, putative		-0.826182	0.00025372
PBANKA_1240100	conserved protein, unknown function		-0.825596	0.0496244
PBANKA_0606300	conserved Plasmodium protein, unknown function		-0.825311	0.00288663
PBANKA_0801800	basal complex transmembrane protein 2, putative	BTP2	-0.825034	5.9735e-06
PBANKA_1412000	Clu domain-containing protein, putative		-0.824376	4.06035e-05
PBANKA_0822700	ribosome production factor 1, putative	RPF1	-0.824212	6.14482e-05
PBANKA_0314100	conserved protein, unknown function		-0.82415	5.54642e-05
PBANKA_0602800	ubiquitin-conjugating enzyme E2, putative	UBC	-0.823633	0.0743891
PBANKA_0707200	alpha/beta hydrolase, putative		-0.823024	0.00170224
PBANKA_1422500	heptatricopeptide repeat and RAP domain-containing protein, putative		-0.820297	0.00795268
PBANKA_1142000	conserved protein, unknown function		-0.819972	0.0246073
PBANKA_0510600	cell division cycle protein 20 homolog	CDC20	-0.819755	0.010834
PBANKA_1411400	ubiquitin-like protein Nedd8	NEDD8	-0.81966	0.00353107
PBANKA_1102000	protein Mpv17, putative	MPV17	-0.819432	0.0024308
PBANKA_1132200	RWD domain-containing protein, putative		-0.818692	0.000108732
PBANKA_0202000	eukaryotic translation initiation factor 4E, putative		-0.818625	5.97856e-05
PBANKA_1002100	6-cysteine protein P36	P36	-0.818537	0.0177166
PBANKA_1312000	condensin-2 complex subunit G2, putative	CAPG2	-0.818366	0.00928067
PBANKA_1351400	phosphoinositide-binding protein PH2, putative	PH2	-0.818208	0.000281297
PBANKA_1348700	RING zinc finger protein, putative		-0.817743	2.15547e-06
PBANKA_1035200	LCCL domain-containing protein	CCp3	-0.816633	0.000613026
PBANKA_0703500	conserved Plasmodium protein, unknown function		-0.813693	0.000367357
PBANKA_1423100	phospholipase PLA1	PLA1	-0.812959	9.89218e-05
PBANKA_0303800	cysteine desulfuration protein SufE	SufE	-0.812397	0.00108666
PBANKA_1406400	tripartite motif protein, putative		-0.811778	2.01273e-05
PBANKA_1019000	conserved Plasmodium protein, unknown function		-0.811536	0.00150997
PBANKA_1115700	kinetochore protein NDC80	NDC80	-0.808145	8.20882e-07
PBANKA_0827800	HSP90 co-chaperone p23, putative	P23	-0.808	8.24799e-05
PBANKA_1345700	GPI transamidase subunit PIG-U, putative		-0.80582	4.24715e-06
PBANKA_1215700	conserved Plasmodium protein, unknown function		-0.805747	0.00599794
PBANKA_1216200	diacylglycerol O-acyltransferase, putative	DGAT	-0.805508	0.0016043
PBANKA_1341300	GTPase-activating protein, putative		-0.804835	0.00492522
PBANKA_1313300	conserved protein, unknown function		-0.804079	7.34883e-05
PBANKA_1239400	50S ribosomal protein L12, apicoplast, putative		-0.801969	1.65189e-05
PBANKA_1108500	protein AAP6, putative		-0.801486	0.00241951
PBANKA_1208100	conserved Plasmodium protein, unknown function		-0.800495	0.00913226
PBANKA_1123800	GAS8-like protein, putative		-0.800094	0.014242
PBANKA_0902800	conserved Plasmodium protein, unknown function		-0.79941	0.194814
PBANKA_1405000	MORN repeat protein, putative		-0.798968	0.000293465
PBANKA_1009800	cytochrome c oxidase assembly protein COX15, putative	COX15	-0.798611	0.00133599
PBANKA_1238300	dynein light chain Tctex-type, putative		-0.794707	0.0152871
PBANKA_0936300	protein transport protein BOS1, putative	BOS1	-0.794045	0.000194156
PBANKA_1309300	exosome-associated factor Rrp47, putative		-0.792576	0.00287673
PBANKA_1111900	CDK-activating kinase assembly factor MAT1, putative	MAT1	-0.792277	9.10342e-05
PBANKA_1245100	conserved Plasmodium protein, unknown function		-0.791162	0.000321914
PBANKA_1209900	conserved protein, unknown function		-0.791016	0.0038327
PBANKA_0305800	SHS2 domain-containing protein, putative		-0.789072	0.000206498
PBANKA_1324700	conserved Plasmodium protein, unknown function		-0.788476	0.0139469
PBANKA_1419400	protein kinase domain-containing protein, putative		-0.788118	0.0232072
PBANKA_1327041	cyclin, fragment		-0.787892	0.593705
PBANKA_1358000	thioredoxin 2	TRX2	-0.787538	0.00125983
PBANKA_1463200	vacuolar protein sorting-associated protein 26, putative	VPS26	-0.787029	0.00043564
PBANKA_0413300	ribosomal protein L47, mitochondrial, putative		-0.785592	0.00137409
PBANKA_0110600	transmembrane protein 234, putative	TMEM234	-0.785199	0.0337583
PBANKA_0213900	dynein light chain, putative		-0.784006	0.0799676
PBANKA_0210100	vacuolar protein sorting-associated protein VTA1, putative		-0.78345	7.02413e-05
PBANKA_1403300	NLI interacting factor-like phosphatase	NIF1	-0.782857	5.46857e-06
PBANKA_1461200	conserved protein, unknown function		-0.782324	0.0014465
PBANKA_0403900	conserved protein, unknown function		-0.78128	0.000410351
PBANKA_1431400	conserved Plasmodium protein, unknown function		-0.781113	0.0112142
PBANKA_0615300	inner membrane complex protein, putative	IMC32	-0.780971	0.0553492
PBANKA_0107700	zinc transporter ZIP1	ZIP1	-0.780117	0.00539497
PBANKA_0615600	thioredoxin-like protein		-0.779769	0.000748443
PBANKA_0939000	mechanosensitive ion channel protein, putative	MSCS	-0.779219	0.00240413
PBANKA_0707000	lipoate-protein ligase B	LipB	-0.77918	0.0139675
PBANKA_0713400	phosphatase, putative		-0.779082	0.0211051
PBANKA_0826600	regulator of nonsense transcripts 2, putative	UPF2	-0.778485	0.000819235
PBANKA_1225900	conserved Plasmodium protein, unknown function		-0.7777	0.000713108
PBANKA_1323600	biotin--protein ligase 2	HCS2	-0.777378	0.0134875
PBANKA_1011600	histone-binding protein RBBP7, putative	RBAP46	-0.776541	0.00092725
PBANKA_0936700	ES2 protein, putative		-0.776365	6.94517e-05
PBANKA_0721800	apical merozoite protein, putative		-0.775641	0.0781455
PBANKA_0719600	memo-like protein		-0.774152	0.00136737
PBANKA_1212900	conserved Plasmodium protein, unknown function		-0.773642	0.000963365
PBANKA_0834100	conserved Plasmodium protein, unknown function		-0.773598	0.000209544
PBANKA_1354700	GPI mannosyltransferase 3, putative	GPI10	-0.773268	0.0278067
PBANKA_1113600	conserved protein, unknown function		-0.772529	0.00411338
PBANKA_0938900	IWS1-like protein, putative		-0.772478	3.70355e-06
PBANKA_1418000	conserved protein, unknown function		-0.772346	0.061814
PBANKA_0508900	conserved protein, unknown function		-0.771401	0.00133682
PBANKA_1311900	conserved Plasmodium protein, unknown function		-0.770796	0.1233
PBANKA_1107100	subtilisin-like protease 1	SUB1	-0.770294	0.00572108
PBANKA_0931600	guanine nucleotide-exchange factor SEC12, putative	SEC12	-0.770207	0.000342345
PBANKA_1133800	DNA helicase, putative		-0.769611	0.000194636
PBANKA_0833300	palmitoyltransferase DHHC6, putative	DHHC6	-0.768678	0.00128266
PBANKA_0108300	palmitoyltransferase DHHC2	DHHC2	-0.767736	0.00959709
PBANKA_1213700	methionine aminopeptidase 1b, putative	METAP1b	-0.767095	1.78521e-05
PBANKA_1113800	ATP-dependent DNA helicase UvrD, putative	UvrD	-0.767086	3.72556e-05
PBANKA_1137700	cytochrome c oxidase subunit 2A, putative	COX2A	-0.766399	2.11009e-05
PBANKA_0710600	phosphatidylglycerophosphate synthase, putative		-0.765043	0.0037548
PBANKA_1441800	conserved Plasmodium protein, unknown function		-0.764973	0.00627949
PBANKA_0816200	ribonuclease H2 subunit C, putative		-0.761634	1.15647e-05
PBANKA_0417600	LCCL domain-containing protein	CCp4	-0.760337	0.0169407
PBANKA_1440800	conserved Plasmodium protein, unknown function		-0.759969	0.00701328
PBANKA_0710700	RNA-binding protein, putative		-0.759808	0.00148393
PBANKA_0620700	conserved Plasmodium protein, unknown function		-0.757338	0.00112348
PBANKA_0505500	apicoplast integral membrane protein, putative		-0.757074	0.00283409
PBANKA_0623450	fam-a protein, pseudogene		-0.757062	0.00173892
PBANKA_1447100	CWC16 domain-containing protein, putative		-0.756701	0.00027619
PBANKA_0301300	conserved protein, unknown function		-0.755404	0.00622384
PBANKA_1034600	conserved Plasmodium protein, unknown function		-0.755184	0.0102779
PBANKA_0202700	kinesin-8B		-0.754224	0.0275254
PBANKA_1114700	rhomboid protease ROM9	ROM9	-0.753967	0.000244525
PBANKA_1340800	conserved Plasmodium protein, unknown function		-0.752957	0.0019384
PBANKA_0806800	coiled-coil domain-containing protein CCDC148/CCDC112, putative		-0.751011	0.019944
PBANKA_0506900	phospholipid scramblase, putative	PLSCR	-0.749777	0.00249655
PBANKA_1124900	oxidoreductase, putative		-0.749535	3.99171e-05
PBANKA_1402400	GINS complex subunit Psf3, putative		-0.749501	0.0104255
PBANKA_1332800	acetyl-CoA carboxylase	ACC	-0.74789	0.000115142
PBANKA_1012200	protein-L-isoaspartate(D-aspartate) O-methyltransferase, putative		-0.746536	0.00256084
PBANKA_1308600	fructose-bisphosphate aldolase 2	ALDO2	-0.746271	0.00500902
PBANKA_0904400	transcription initiation factor IIF subunit beta, putative	TFG2	-0.745943	0.00166108
PBANKA_0903200	conserved Plasmodium protein, unknown function		-0.745556	0.000707505
PBANKA_1203700	regulator of nonsense transcripts 1, putative	UPF1	-0.745043	0.000224769
PBANKA_0200600	fam-a protein		-0.74452	0.0494553
PBANKA_1129500	bifunctional methylenetetrahydrofolate dehydrogenase/cyclohydrolase, putative		-0.74236	0.00319085
PBANKA_1450100	N6-adenosine-methyltransferase, putative		-0.74233	0.00123453
PBANKA_1452900	dynactin subunit 3, putative		-0.741238	0.0275731
PBANKA_0709000	protein transport protein SEC61 subunit beta, putative	SEC61B	-0.740449	0.00282264
PBANKA_0830300	CH domain-containing protein, putative		-0.740403	0.00068874
PBANKA_0917100	serpentine receptor 1, putative	SR1	-0.740029	0.0034754
PBANKA_1335600	M1-family alanyl aminopeptidase, putative		-0.739043	0.00813095
PBANKA_0414900	dynein intermediate light chain, putative		-0.73901	0.000242293
PBANKA_0622300	kelch domain-containing protein, putative		-0.738423	0.00313068
PBANKA_1351100	exoribonuclease, putative		-0.737891	0.000561831
PBANKA_1217900	conserved protein, unknown function		-0.737387	0.00786259
PBANKA_1034700	multifunctional methyltransferase subunit TRM112, putative	TRM112	-0.73729	0.00512643
PBANKA_0515300	SAE2 domain-containing protein, putative		-0.736521	1.33062e-05
PBANKA_0829700	guanylate kinase, putative	GK	-0.735596	0.00106522
PBANKA_1444300	mitochondrial respiratory chain complex II subunit, putative		-0.735024	0.00351248
PBANKA_0520100	conserved Plasmodium protein, unknown function		-0.734581	0.00143934
PBANKA_1447750	dolichyl-diphosphooligosaccharide--protein glycosyltransferase subunit OST4, putative	OST4	-0.734317	0.318568
PBANKA_0905700	DNA-directed RNA polymerases I and III subunit RPAC1, putative	RPC40	-0.733943	0.0013869
PBANKA_1338700	plasmepsin V, putative	PMV	-0.733595	0.000114918
PBANKA_0607100	mitochondrial import inner membrane translocase subunit TIM10, putative	TIM10	-0.731078	0.00772471
PBANKA_0810500	apoptosis-related protein, putative	ARP	-0.730839	0.00048511
PBANKA_1404600	conserved Plasmodium protein, unknown function		-0.730077	0.0226393
PBANKA_1331700	C3H1-type zinc finger protein CZIF1, putative	CZIF1	-0.72989	0.00859209
PBANKA_1208000	tubulin--tyrosine ligase, putative		-0.72825	0.00349249
PBANKA_1418800	SNARE protein, putative		-0.727604	0.00021413
PBANKA_0205000	ELM2 domain-containing protein, putative		-0.726454	0.000505403
PBANKA_1013800	cytochrome c oxidase subunit 2B, putative	COX2B	-0.726415	0.000833199
PBANKA_0828000	gametocyte development protein GD1	GD1	-0.726376	0.000158486
PBANKA_0601300	peptidyl-prolyl cis-trans isomerase, putative	CYP26	-0.726232	0.00129732
PBANKA_0619200	secreted ookinete protein, putative	PSOP1	-0.725423	0.014644
PBANKA_0922900	mitochondrial import inner membrane translocase subunit TIM44, putative	TIM44	-0.725181	0.000131872
PBANKA_0610700	conserved Plasmodium protein, unknown function		-0.724104	0.0593296
PBANKA_0302600	3'-5' exonuclease, putative		-0.723861	0.011297
PBANKA_0714100	trafficking protein particle complex subunit 2-like protein, putative	TRAPPC2L	-0.723617	0.0343862
PBANKA_1115400	BolA-like protein, putative		-0.722918	0.00471959
PBANKA_0912800	conserved Plasmodium protein, unknown function		-0.72235	0.00446897
PBANKA_1325000	40S ribosomal protein S28e, putative		-0.721977	0.000851936
PBANKA_1144600	mitochondrial carrier protein, putative		-0.721796	0.0025368
PBANKA_1231200	phosducin-like protein 1, putative	PhLP1	-0.721423	0.00081541
PBANKA_0907500	conserved Plasmodium protein, unknown function		-0.720581	0.00873871
PBANKA_1319800	serine hydroxymethyltransferase, putative	SHMT	-0.719217	0.0168469
PBANKA_0911000	calcium-binding protein, putative		-0.719209	0.0232671
PBANKA_1203500	conserved Plasmodium protein, unknown function		-0.719063	0.0412389
PBANKA_1329000	conserved Plasmodium protein, unknown function		-0.718533	0.0385628
PBANKA_1444400	conserved Plasmodium protein, unknown function		-0.717505	0.00109136
PBANKA_0408300	phd finger protein, putative		-0.715548	7.09657e-05
PBANKA_0205800	eukaryotic translation initiation factor 2-alpha kinase 2	eIK2	-0.713368	0.00807693
PBANKA_1017000	CorA-like Mg2+ transporter protein, putative	MIT3	-0.71173	0.136759
PBANKA_1233900	50S ribosomal protein L14, mitochondrial, putative		-0.710293	0.000209544
PBANKA_1032300	CTP synthase, putative	CTPS	-0.710075	0.00152289
PBANKA_0312600	palmitoyltransferase DHHC11, putative	DHHC11	-0.709568	0.0081822
PBANKA_0913100	RNA-binding protein, putative		-0.709416	0.00996131
PBANKA_0934700	conserved protein, unknown function		-0.709197	0.021782
PBANKA_0521200	conserved Plasmodium protein, unknown function		-0.706868	0.0321349
PBANKA_0708900	WPP motif-containing protein, putative		-0.706853	0.00641445
PBANKA_1358200	cytochrome c oxidase subunit ApiCOX16, putative		-0.70637	0.00386094
PBANKA_0821900	ubiquitin-conjugating enzyme E2, putative		-0.706257	0.0128439
PBANKA_0616600	ATP synthase F0 subunit a-like protein, putative		-0.706119	0.00131
PBANKA_1420700	MAATS1 domain-containing protein, putative		-0.705532	0.00363267
PBANKA_1346200	signal peptidase complex catalytic subunit SEC11, putative	SEC11	-0.705363	0.00107318
PBANKA_0207600	asparagine-rich antigen, putative		-0.7043	0.00474715
PBANKA_0827100	protein kinase, putative		-0.704068	0.00994151
PBANKA_0303900	pantothenate transporter	PAT	-0.703359	0.000903831
PBANKA_1200700	conserved Plasmodium protein, unknown function		-0.702905	0.0370245
PBANKA_0716900	armadillo-domain containing rhoptry protein, putative	ARO	-0.701731	0.0366233
PBANKA_1037100	GTPase-activating protein, putative		-0.701512	0.00293333
PBANKA_0304200	DNA-directed RNA polymerase III subunit RPC10, putative		-0.700785	0.00505903
PBANKA_1306100	GTP-binding protein YihA2, putative		-0.700748	0.00394432
PBANKA_1032800	conserved protein, unknown function		-0.699461	0.000710479
PBANKA_0905600	translation initiation factor eIF-1A, putative		-0.698181	0.00505989
PBANKA_0716300	Rab5-interacting protein, putative		-0.697491	0.0100574
PBANKA_0618500	conserved Plasmodium protein, unknown function		-0.696823	0.000122333
PBANKA_0605100	Tat binding protein 1(TBP-1)-interacting protein, putative		-0.696371	0.000861016
PBANKA_0511300	ribosomal protein RSM22, putative	RSM22	-0.693502	0.000263177
PBANKA_1109200	asparagine--tRNA ligase, putative		-0.692418	0.00165657
PBANKA_1236800	conserved Plasmodium protein, unknown function		-0.692195	0.00313492
PBANKA_1031500	conserved Plasmodium protein, unknown function		-0.692026	0.000918954
PBANKA_1419300	conserved Plasmodium protein, unknown function	REC8	-0.690342	0.0164531
PBANKA_0935700	Josephin domain-containing protein, putative		-0.689587	0.0624827
PBANKA_1458600	50S ribosomal protein L3, mitochondrial, putative		-0.689465	0.000323746
PBANKA_1416400	nucleolar complex protein 4, putative	NOC4	-0.688566	0.00230211
PBANKA_1450400	peptidase, putative		-0.688487	0.00225215
PBANKA_0601500	trimethylguanosine synthase, putative	TGS1	-0.68742	0.00178773
PBANKA_1230800	pyridoxal kinase, putative	PDXK	-0.686704	0.00183367
PBANKA_1355400	tetratricopeptide repeat protein, putative		-0.686351	0.13186
PBANKA_1401700	SNARE protein, putative		-0.686007	0.00025906
PBANKA_1223400	conserved Plasmodium protein, unknown function		-0.685854	0.00178468
PBANKA_1013700	ribosomal protein L17, mitochondrial, putative		-0.685496	0.0024308
PBANKA_1430600	conserved Plasmodium protein, unknown function		-0.685029	0.0397103
PBANKA_1364300	glycerol kinase, putative		-0.684296	0.000767789
PBANKA_1446600	WD repeat-containing protein, putative		-0.68413	0.00255169
PBANKA_0603000	conserved Plasmodium protein, unknown function		-0.68394	0.000298715
PBANKA_0512500	ribosome biogenesis protein RPF2, putative		-0.683199	0.00722209
PBANKA_0600300	PIR protein		-0.683146	0.219907
PBANKA_1026100	conserved Plasmodium protein, unknown function		-0.682233	0.0459593
PBANKA_0718100	glutamyl-tRNA(Gln) amidotransferase subunit A	GATA	-0.682056	0.00743992
PBANKA_1421800	ATP synthase subunit epsilon, mitochondrial, putative		-0.681744	0.00315772
PBANKA_1035800	pentatricopeptide repeat-containing protein 1, putative	PPR1	-0.681707	0.000621514
PBANKA_0703000	magnesium transporter, putative		-0.68089	0.00699754
PBANKA_1136300	RNA-binding protein, putative	RRM1	-0.680448	0.000867446
PBANKA_1138800	conserved Plasmodium protein, unknown function		-0.680375	0.00490693
PBANKA_1418400	ATP-dependent Clp protease adapter protein ClpS, putative	ClpS	-0.680056	0.00205099
PBANKA_0617000	cell division control protein CDC50A, putative	CDC50A	-0.679858	0.00283221
PBANKA_1336100	dihydroorotase, putative	DHOase	-0.678569	0.0184307
PBANKA_1013200	succinate--CoA ligase [ADP-forming] subunit beta, putative		-0.677796	0.000457147
PBANKA_1433400	diphthamide biosynthesis protein 3, putative	DPH3	-0.677324	0.141926
PBANKA_0603700	conserved protein, unknown function		-0.676671	0.000592161
PBANKA_1364800	ABC transporter B family member 6, putative	ABCB6	-0.676563	0.0292795
PBANKA_1408800	zinc finger protein, putative		-0.675812	0.0537824
PBANKA_0317001	PIR protein		-0.675554	0.686429
PBANKA_1016000	heme/steroid binding domain containing protein, putative		-0.675209	0.000996498
PBANKA_0617700	conserved protein, unknown function		-0.674826	0.00105619
PBANKA_1322900	OPA3-like protein, putative		-0.674696	0.00294438
PBANKA_1118800	conserved Plasmodium protein, unknown function		-0.673568	0.0810634
PBANKA_1104500	transmembrane protein TMEM222, putative		-0.672847	0.0158882
PBANKA_0810000	mitochondrial carrier protein, putative		-0.672074	0.000262796
PBANKA_0828100	fumarate hydratase, putative	FH	-0.670957	0.0034754
PBANKA_1034800	conserved Plasmodium protein, unknown function		-0.670515	0.00121188
PBANKA_0806500	triosephosphate isomerase, putative		-0.67043	0.00614007
PBANKA_0903300	bicoid-interacting protein BIN3, putative		-0.669988	0.0432869
PBANKA_1119900	DnaJ protein, putative		-0.669918	0.0180643
PBANKA_0712700	C3H1-type zinc finger protein CZIF2, putative	CZIF2	-0.669548	0.0566917
PBANKA_0930800	conserved Plasmodium protein, unknown function		-0.669454	0.0411091
PBANKA_1308700	conserved protein, unknown function		-0.669317	0.0151077
PBANKA_1240800	RAP protein, putative		-0.668841	0.171964
PBANKA_1019200	conserved Plasmodium protein, unknown function		-0.668044	5.37933e-05
PBANKA_0902400	kinesin-X4		-0.667975	0.00810952
PBANKA_1335700	conserved Plasmodium protein, unknown function		-0.667813	0.0344735
PBANKA_1218500	protein phosphatase inhibitor 2, putative		-0.66778	0.00460673
PBANKA_0202400	conserved Plasmodium protein, unknown function		-0.667522	9.82351e-05
PBANKA_0904900	mitochondrial large subunit ribosomal protein, putative		-0.665161	0.0166788
PBANKA_1118200	FPL domain-containing protein, putative		-0.664556	0.000143213
PBANKA_0903700	cysteine-rich PDZ-binding protein, putative	CRIPT	-0.663224	0.00591372
PBANKA_1118000	heptatricopeptide repeat-containing protein, putative		-0.662731	0.00351248
PBANKA_0209800	conserved protein, unknown function		-0.662611	0.0180643
PBANKA_1463700	DNA repair protein rhp16, putative		-0.662393	0.00101696
PBANKA_1343400	BRCA2 protein		-0.661213	0.000249644
PBANKA_0714600	vacuolar protein sorting-associated protein 2, putative	VPS2	-0.660556	0.0119252
PBANKA_0908900	V-type proton ATPase subunit F, putative		-0.659215	0.00699944
PBANKA_0718700	CDGSH iron-sulfur domain-containing protein, putative		-0.658782	0.00450713
PBANKA_0405700	ATP-dependent Clp protease proteolytic subunit, putative	ClpP	-0.658623	0.0224075
PBANKA_1014800	ADP-dependent DNA helicase RecQ, putative	WRN	-0.658434	0.0153031
PBANKA_0413900	ribosomal protein L27, mitochondrial, putative		-0.658338	0.0101643
PBANKA_1354100	ras-related protein Rab-11B, putative	RAB11b	-0.657795	0.000385097
PBANKA_1439700	conserved protein, unknown function		-0.657636	0.00256539
PBANKA_0944021	fam-a protein, pseudogene		-0.657007	0.833726
PBANKA_0721200	conserved Plasmodium protein, unknown function		-0.656902	0.073923
PBANKA_0615100	queuine tRNA-ribosyltransferase, putative		-0.656645	0.00986374
PBANKA_0809900	tRNA pseudouridine synthase, putative		-0.656601	0.000510956
PBANKA_1015700	protein archease, putative		-0.656426	0.0449468
PBANKA_1220900	conserved protein, unknown function		-0.656307	0.00625048
PBANKA_1236600	conserved Plasmodium protein, unknown function		-0.656036	0.00410468
PBANKA_1426800	conserved Plasmodium protein, unknown function		-0.655806	0.0531371
PBANKA_0932900	glycerol-3-phosphate dehydrogenase, putative	G3PDH	-0.655691	0.0467277
PBANKA_1105700	60S ribosomal subunit protein L24, putative		-0.655572	0.00708287
PBANKA_1119400	conserved Plasmodium protein, unknown function		-0.655277	0.0506582
PBANKA_0202900	transcription initiation factor TFIIB, putative		-0.65434	0.00225957
PBANKA_1445700	conserved Plasmodium protein, unknown function		-0.654272	0.00129495
PBANKA_0819400	conserved Plasmodium protein, unknown function		-0.652752	0.0170592
PBANKA_1038600	dynein regulatory complex protein, putative		-0.651669	0.10396
PBANKA_1300700	LCCL domain-containing protein	CCp1	-0.650982	0.00241951
PBANKA_0601800	DNA/RNA-binding protein, putative		-0.650679	0.00256868
PBANKA_1226800	DNA repair and recombination protein RAD54, putative	RAD54	-0.650577	0.00177104
PBANKA_0707900	thrombospondin-related protein 1	TRP1	-0.649945	0.059317
PBANKA_1439100	BRO1 domain-containing protein, putative		-0.649132	0.0639292
PBANKA_1328200	EF-hand calcium-binding domain-containing protein, putative		-0.646912	0.0288094
PBANKA_1019330	small nucleolar RNA snoR30		-0.646727	0.03435
PBANKA_1304000	cohesin complex subunit RAD21, putative		-0.645897	0.0206063
PBANKA_1300500	tubulin epsilon chain, putative		-0.645205	0.0387593
PBANKA_0417400	GTPase-activating protein, putative		-0.645074	0.000124588
PBANKA_0916900	conserved Plasmodium protein, unknown function		-0.642819	0.00084099
PBANKA_1110700	stearoyl-CoA desaturase	SCD	-0.642516	0.004699
PBANKA_1406500	conserved Plasmodium protein, unknown function		-0.641833	0.0057041
PBANKA_1102300	conserved Plasmodium protein, unknown function		-0.641193	0.00144055
PBANKA_0909000	carbonic anhydrase, putative	CA	-0.640549	0.0227045
PBANKA_1324200	conserved Plasmodium protein, unknown function		-0.639709	0.016466
PBANKA_1209700	protein ARV1, putative	ARV1	-0.638918	0.0150116
PBANKA_1310500	apicomplexan kinetochore protein 4	AKIT4	-0.638169	0.00640387
PBANKA_1312900	conserved Plasmodium protein, unknown function		-0.63815	0.0159652
PBANKA_1228300	lysine-specific histone demethylase, putative	LSD2	-0.637936	0.00177125
PBANKA_1138500	3'-5' exonuclease, putative		-0.637851	0.0433913
PBANKA_1320100	conserved Plasmodium protein, unknown function	UIS25	-0.637313	0.0158843
PBANKA_1229300	conserved Plasmodium protein, unknown function		-0.636778	0.063908
PBANKA_1434300	conserved Plasmodium protein, unknown function		-0.636529	0.0857784
PBANKA_0943561	tRNA Glycine		-0.63645	0.707951
PBANKA_1010200	methionine aminopeptidase 2, putative	METAP2	-0.636277	0.00161737
PBANKA_0610600	peripheral plastid protein 1, putative	PPP1	-0.635737	0.0021587
PBANKA_1104200	2-oxoisovalerate dehydrogenase subunit beta, mitochondrial, putative	BCKDHB	-0.635005	0.00111522
PBANKA_1104000	ATP-dependent helicase, putative		-0.633428	0.0430236
PBANKA_1321500	conserved Plasmodium protein, unknown function		-0.632958	0.0239335
PBANKA_1201800	conserved Plasmodium protein, unknown function		-0.632638	0.132315
PBANKA_0408900	conserved Plasmodium protein, unknown function		-0.6325	0.0011396
PBANKA_1317300	RAP protein, putative		-0.631871	0.0146257
PBANKA_1146700	PIR protein		-0.630639	0.129906
PBANKA_1337000	ribosome assembly 1 protein, putative	NUF1P1	-0.629815	0.0250657
PBANKA_0614700	conserved Plasmodium membrane protein, unknown function		-0.629435	0.0226747
PBANKA_1019320	Plasmodium RNA of unknown function RUF4		-0.628994	0.114666
PBANKA_0830900	leucine-rich repeat protein	LRR8	-0.628891	0.060235
PBANKA_0524600	PIR protein		-0.628727	0.00711054
PBANKA_1017300	conserved Plasmodium protein, unknown function		-0.628234	0.0212027
PBANKA_1304500	protein SOC3	SOC3	-0.627882	0.0339676
PBANKA_0507400	orotidine 5'-phosphate decarboxylase, putative	OMPDC	-0.627361	0.00352928
PBANKA_1017500	lipase, putative	UIS28	-0.626152	0.0508867
PBANKA_0921100	tRNA (guanine-N(7)-)-methyltransferase, putative		-0.625782	0.00234336
PBANKA_0912900	conserved Plasmodium protein, unknown function		-0.624646	0.00891468
PBANKA_0407000	conserved protein, unknown function		-0.624603	0.0227565
PBANKA_0207700	FtsJ-like methyltransferase, putative		-0.624281	0.00154109
PBANKA_0515700	conserved Plasmodium protein, unknown function		-0.623061	0.0153953
PBANKA_1224100	kinesin-like protein, putative		-0.619565	0.00341996
PBANKA_1330900	conserved Plasmodium protein, unknown function		-0.618946	0.00894125
PBANKA_1444500	myosin J	MyoJ	-0.618164	0.000579529
PBANKA_1312800	CLASP domain-containing protein, putative		-0.618148	0.00129182
PBANKA_0618300	Ham1-like protein, putative		-0.616516	0.0574633
PBANKA_1227200	peptidyl-prolyl cis-trans isomerase, putative	CYP81	-0.616333	0.000264148
PBANKA_0306900	Sec61-gamma subunit of protein translocation complex, putative		-0.616281	0.00320446
PBANKA_0206100	CCR4 domain-containing protein 3, putative	CCR4-3	-0.615086	0.0172703
PBANKA_1446200	mitosis protein dim1, putative		-0.614514	0.0908583
PBANKA_0905900	AP2 domain transcription factor AP2-O	AP2-O	-0.613198	0.14333
PBANKA_1213600	cysteine--tRNA ligase, putative	CysRS	-0.612792	0.0112142
PBANKA_0824400	cyclin-dependent kinases regulatory subunit, putative		-0.612771	0.00278629
PBANKA_0937300	G-patch domain-containing protein, putative		-0.612056	0.00136854
PBANKA_1425800	conserved Plasmodium protein, unknown function		-0.611874	0.0535625
PBANKA_0315100	ATP-dependent RNA helicase DDX47, putative	DDX47	-0.611344	0.00351667
PBANKA_0907600	phosphatidylinositol N-acetylglucosaminyltransferase subunit H, putative	PIGH	-0.611022	0.0304159
PBANKA_1212400	GDP-L-fucose synthase, putative	FS	-0.61024	0.0680506
PBANKA_1145731	tRNA Tryptophan		-0.609584	0.513921
PBANKA_0917000	conserved Plasmodium protein, unknown function		-0.608301	0.00175416
PBANKA_0827000	conserved Plasmodium protein, unknown function		-0.606841	0.370147
PBANKA_0934600	conserved Plasmodium protein, unknown function		-0.606617	0.0883989
PBANKA_0106400	GTP-binding protein, putative		-0.60587	0.00225957
PBANKA_0501800	myosin essential light chain ELC, putative	ELC	-0.605234	0.118755
PBANKA_1462900	rRNA-processing protein FCF2, putative	FCF2	-0.604332	0.00123396
PBANKA_0920000	multiprotein-bridging factor 1, putative	MBF1	-0.602853	0.00373138
PBANKA_1431050	10 kDa chaperonin, putative	CPN10	-0.602211	0.0222738
PBANKA_1326600	mediator of RNA polymerase II transcription subunit 20, putative	MED20	-0.602204	0.04084
PBANKA_0815300	met-10+ like protein, putative		-0.601736	0.0141993
PBANKA_0102900	AP2 domain transcription factor, putative	SIP2	-0.599858	0.0369981
PBANKA_1114600	pre-mRNA-splicing factor CWC2, putative	CWC2	-0.598606	0.00299011
PBANKA_1333400	conserved Plasmodium protein, unknown function		-0.597797	0.0164152
PBANKA_1362200	cytidine and deoxycytidylate deaminase, putative		-0.59773	0.0632431
PBANKA_1324100	ubiquitin carboxyl-terminal hydrolase isozyme L3, putative	UCHL3	-0.597593	0.00410039
PBANKA_0607200	conserved protein, unknown function		-0.597551	0.150855
PBANKA_0501600	golgi re-assembly stacking protein, putative	GRASP	-0.594146	0.0220652
PBANKA_1220400	protein BRAWNIN, putative		-0.593831	0.0467277
PBANKA_0905500	regulator of chromosome condensation, putative	RCC (0905500)	-0.59324	0.0226263
PBANKA_1224900	CH domain-containing protein		-0.592945	0.000487066
PBANKA_0923100	ubiquitin-like domain-containing protein, putative		-0.589247	0.0811694
PBANKA_1458400	conserved Plasmodium protein, unknown function		-0.589025	0.0699199
PBANKA_0718600	prohibitin-like protein PHBL	PHBL	-0.58825	0.127814
PBANKA_0828200	conserved Plasmodium protein, unknown function		-0.586756	0.012451
PBANKA_1438900	GTP cyclohydrolase 1, putative	GCH1	-0.586161	0.00446897
PBANKA_1120300	mRNA-binding protein PUF3, putative	PUF3	-0.585959	0.195603
PBANKA_0702600	conserved Plasmodium protein, unknown function		-0.585004	0.0443198
PBANKA_1141600	conserved Plasmodium protein, unknown function		-0.584981	0.00275468
PBANKA_1138000	cytochrome c oxidase subunit ApiCOX24, putative		-0.584895	0.0016052
PBANKA_0102700	conserved Plasmodium protein, unknown function		-0.583891	0.0261271
PBANKA_1007600	erythrocyte vesicle protein 1, putative	EVP1	-0.582876	0.00582339
PBANKA_0924100	thioredoxin-like protein, putative		-0.582144	0.0117899
PBANKA_1460200	conserved protein, unknown function		-0.581955	0.00591372
PBANKA_1331300	WD repeat-containing protein, putative		-0.581592	0.0281029
PBANKA_0209100	thrombospondin-related sporozoite protein	TRSP	-0.581543	0.01274
PBANKA_0934400	conserved Plasmodium protein, unknown function		-0.581203	0.00314674
PBANKA_1323500	rhoptry protein, putative		-0.580634	0.0741642
PBANKA_1226450	Plasmodium RNA of unknown function RUF3		-0.580172	0.818067
PBANKA_1432451	tRNA Proline		-0.578382	0.608111
PBANKA_1363500	N6-adenine-specific methylase, putative		-0.578062	0.00149128
PBANKA_1345000	PITH domain-containing protein, putative		-0.577401	0.0306153
PBANKA_1448000	pentatricopeptide repeat domain-containing protein 2, putative	PPR2	-0.576558	0.00194965
PBANKA_0825500	conserved Plasmodium protein, unknown function		-0.575676	0.109361
PBANKA_0712100	DNA helicase, putative		-0.575666	0.00275786
PBANKA_0513900	ORC3 domain-containing protein, putative		-0.573769	0.00721892
PBANKA_0934800	conserved protein, unknown function		-0.573562	0.0818126
PBANKA_1240900	conserved Plasmodium protein, unknown function		-0.572883	0.223656
PBANKA_0511100	conserved Plasmodium protein, unknown function		-0.572745	0.0654191
PBANKA_1441500	U3 small nucleolar RNA-interacting protein 2, putative	RRP9	-0.572301	0.0070381
PBANKA_0902300	female development protein FD2	FD2	-0.572286	0.0145312
PBANKA_0925700	conserved Plasmodium protein, unknown function		-0.5712	0.0897257
PBANKA_1419200	RNA-binding protein, putative		-0.571007	0.00440553
PBANKA_1131500	conserved Plasmodium protein, unknown function		-0.570939	0.00627336
PBANKA_0937860	small nucleolar RNA snoR09		-0.570537	0.586392
PBANKA_0502100	conserved Plasmodium protein, unknown function		-0.570497	0.0078507
PBANKA_1423900	translation initiation factor SUI1, putative		-0.570388	0.118834
PBANKA_0809000	translation initiation factor SUI1, putative		-0.569244	0.00137488
PBANKA_0831800	elongation factor Tu, putative		-0.568965	0.0371252
PBANKA_1101500	anaphase-promoting complex subunit 3	APC3	-0.568683	0.0334035
PBANKA_1342100	conserved Plasmodium protein, unknown function		-0.568338	0.0873647
PBANKA_0301700	5'-3' exonuclease, putative		-0.567974	0.00195123
PBANKA_1310000	conserved Plasmodium protein, unknown function		-0.567721	0.00326008
PBANKA_0802900	conserved Plasmodium protein, unknown function		-0.567456	0.195621
PBANKA_0706100	conserved protein, unknown function		-0.566926	0.0346511
PBANKA_0409400	kinase-related protein PKRP	PKRP	-0.565948	0.0217105
PBANKA_0720500	LSM domain-containing protein, putative		-0.565752	0.11848
PBANKA_1015100	conserved Plasmodium protein, unknown function		-0.565333	0.0286425
PBANKA_1324800	conserved Plasmodium protein, unknown function		-0.565329	0.0327758
PBANKA_1116200	ras GTPAse, putative		-0.564989	0.00443079
PBANKA_0007901	PIR protein		-0.564214	0.740415
PBANKA_1145741	tRNA Arginine		-0.564065	0.463077
PBANKA_1356100	conserved Plasmodium protein, unknown function		-0.563429	0.019095
PBANKA_0937000	ribosomal protein L11, mitochondrial, putative		-0.562221	0.00595986
PBANKA_1005800	conserved Plasmodium protein, unknown function		-0.561999	0.00248794
PBANKA_1451600	SUMO-activating enzyme subunit 2, putative	UBA2	-0.561484	0.00290889
PBANKA_1218700	conserved Plasmodium protein, unknown function		-0.559559	0.0119082
PBANKA_1357300	zinc finger protein, putative		-0.558917	0.0722403
PBANKA_1456800	vacuolar-sorting protein SNF7, putative	SNF7	-0.557143	0.00882526
PBANKA_1306900	serine/threonine protein kinase, putative	SRPK2	-0.556654	0.00522118
PBANKA_1457000	fused toes protein homolog FTS, putative		-0.55661	0.0154685
PBANKA_0503000	conserved protein, unknown function		-0.556344	0.0574476
PBANKA_1023700	conserved Plasmodium protein, unknown function		-0.55604	0.0111187
PBANKA_0919800	bifunctional farnesyl/geranylgeranyl diphosphate synthase, putative	FPPS/GGPPS	-0.554851	0.00637911
PBANKA_1323300	pyridoxal 5'-phosphate synthase, putative		-0.554676	0.0515026
PBANKA_1101900	HCNGP-like protein, putative		-0.553521	0.0312198
PBANKA_1010300	dynein-related AAA-type ATPase, putative		-0.553508	0.00117704
PBANKA_1107500	conserved Plasmodium protein, unknown function		-0.552425	0.0558934
PBANKA_1004500	conserved Plasmodium protein, unknown function		-0.552362	0.0117047
PBANKA_0308200	apicoplast beta-ketoacyl-acyl carrier protein synthase III precursor, putative		-0.551732	0.0410748
PBANKA_1109600	conserved Plasmodium protein, unknown function		-0.551699	0.0565197
PBANKA_1105600	conserved Plasmodium protein, unknown function		-0.551426	0.0711142
PBANKA_0206700	conserved Plasmodium protein, unknown function		-0.55135	0.0436063
PBANKA_0104400	nucleoside diphosphate kinase, putative		-0.549014	0.0281008
PBANKA_0301000	repetitive organellar protein, putative	ROPE	-0.548003	0.00118747
PBANKA_0312700	SNF2-like chromatin remodeling ATPase	gSNF2	-0.547695	0.0379451
PBANKA_0307300	50S ribosomal protein L33, putative		-0.547427	0.0407588
PBANKA_0310300	protein kinase 7	PK7	-0.5473	0.00577548
PBANKA_0908500	myosin K	MyoK	-0.5472	0.00540362
PBANKA_0831600	conserved Plasmodium protein, unknown function		-0.546442	0.0317657
PBANKA_1038700	tetratricopeptide repeat protein, putative		-0.546196	0.119515
PBANKA_1130900	large subunit rRNA methyltransferase, putative		-0.54601	0.0579701
PBANKA_0828500	serine/threonine protein phosphatase 4	PPP4	-0.542432	0.0168509
PBANKA_1447200	CG2-related protein, putative		-0.541465	0.00894125
PBANKA_1407000	conserved Plasmodium protein, unknown function		-0.540987	0.0273955
PBANKA_1017600	conserved Plasmodium protein, unknown function		-0.540694	0.0112474
PBANKA_1455500	conserved Plasmodium protein, unknown function		-0.540657	0.180848
PBANKA_0817000	major facilitator superfamily domain-containing protein, putative	MFS2	-0.540515	0.00943795
PBANKA_0825100	heptatricopeptide repeat-containing protein, putative		-0.54037	0.0515731
PBANKA_1018300	dynein intermediate chain, putative		-0.540313	0.0333438
PBANKA_0917990	small nucleolar RNA snoR13		-0.539914	0.0743799
PBANKA_0803300	RNA helicase, putative		-0.53966	0.0515026
PBANKA_0919900	ATP-dependent 6-phosphofructokinase, putative	PFK11	-0.538959	0.0219287
PBANKA_1013300	mitogen-activated protein kinase 1	MAPK1	-0.538693	0.0536185
PBANKA_1137600	Fe-S assembly protein IscX, putative	YfhJ	-0.538409	0.0385628
PBANKA_0937600	conserved Plasmodium protein, unknown function		-0.538208	0.0787449
PBANKA_0108100	conserved Plasmodium protein, unknown function		-0.53642	0.0988686
PBANKA_1218600	conserved protein, unknown function		-0.536146	0.0308656
PBANKA_1208800	MORN repeat protein, putative		-0.535548	0.0847795
PBANKA_1235700	conserved Plasmodium protein, unknown function		-0.534882	0.177786
PBANKA_API00206	chaperone protein ClpM, putative	ClpM	-0.53438	0.919316
PBANKA_1020400	nucleolar GTP-binding protein 2, putative	NOG2	-0.532939	0.00797756
PBANKA_1036400	ribosome biogenesis protein BOP1, putative	BOP1	-0.532522	0.00712772
PBANKA_0702000	coiled-coil domain-containing protein 39, putative		-0.531693	0.00315536
PBANKA_0606500	ribosomal protein L29, apicoplast, putative		-0.531447	0.0937498
PBANKA_1312500	Appr-1-p processing domain protein		-0.530046	0.0154685
PBANKA_0305300	KRR1 small subunit processome component, putative	KRR1	-0.529238	0.115273
PBANKA_0705500	ankyrin-repeat protein, putative		-0.529162	0.109563
PBANKA_0701500	prohibitin 1	PHB1	-0.528713	0.00964627
PBANKA_1115200	gamete egress protein GEP	GEP	-0.52829	0.00810952
PBANKA_0944081	PIR protein		-0.528155	0.490427
PBANKA_0815700	major facilitator superfamily-related transporter, putative	MFR4	-0.528009	0.00905183
PBANKA_1453800	zinc finger protein, putative		-0.52741	0.0492822
PBANKA_1343600	conserved protein, unknown function		-0.527303	0.00900214
PBANKA_0410541	tRNA Valine		-0.527142	0.346643
PBANKA_1451500	conserved Plasmodium protein, unknown function		-0.526585	0.0753957
PBANKA_1033700	conserved Plasmodium protein, unknown function		-0.526498	0.134369
PBANKA_0833800	CSTF domain-containing protein, putative		-0.525077	0.00815183
PBANKA_0604900	conserved Plasmodium protein, unknown function		-0.524579	0.0217377
PBANKA_0518600	conserved protein, unknown function		-0.52229	0.0976493
PBANKA_1125000	conserved Plasmodium protein, unknown function		-0.522201	0.06593
PBANKA_0607900	cGMP-specific 3',5'-cyclic phosphodiesterase alpha, putative	PDEalpha	-0.522162	0.022374
PBANKA_1200081	PIR protein		-0.521776	0.842363
PBANKA_1458800	kinesin-15		-0.521629	0.0100982
PBANKA_0802400	phosphopantetheine adenylyltransferase, putative	PPAT	-0.521063	0.0813046
PBANKA_1423200	AAA family ATPase, putative		-0.520995	0.0683954
PBANKA_1213200	EF hand domain-containing protein, putative		-0.520957	0.0916594
PBANKA_1444200	conserved Plasmodium protein, unknown function		-0.519761	0.00613666
PBANKA_1001100	ubiquitin-specific protease, putative		-0.519583	0.0538208
PBANKA_1009100	ataxin-2 like protein, putative		-0.518519	0.00823417
PBANKA_1242441	tRNA Leucine		-0.518062	0.754603
PBANKA_0206400	2-C-methyl-D-erythritol 4-phosphate cytidylyltransferase, putative	IspD	-0.516768	0.0708637
PBANKA_0705900	lipase maturation factor, putative	LMF1	-0.516186	0.00795269
PBANKA_0718300	DNA helicase MCM9, putative	MCM9	-0.515708	0.130373
PBANKA_1316500	conserved Plasmodium protein, unknown function		-0.515623	0.110929
PBANKA_1353600	conserved Plasmodium protein, unknown function		-0.514882	0.493606
PBANKA_1414600	inositol polyphosphate kinase, putative	IPK2	-0.513278	0.0253646
PBANKA_0902500	oocyst rupture protein 1	ORP1	-0.512956	0.0145312
PBANKA_1103800	ATP-dependent RNA helicase DDX27, putative	DDX27	-0.512877	0.0874727
PBANKA_1218000	nicotinamidase, putative		-0.512618	0.24077
PBANKA_1117100	histone H3 variant	H3.3	-0.51246	0.00877003
PBANKA_0720000	conserved Plasmodium protein, unknown function		-0.512173	0.00906787
PBANKA_0927100	conserved protein, unknown function		-0.510308	0.0716541
PBANKA_1341400	conserved Plasmodium protein, unknown function		-0.510258	0.0615069
PBANKA_1463100	CSC1-like protein, putative		-0.510038	0.00434493
PBANKA_0808600	conserved Plasmodium protein, unknown function		-0.509233	0.0305524
PBANKA_0511200	U3 small nucleolar ribonucleoprotein protein MPP10, putative	MPP10	-0.509172	0.0287497
PBANKA_0918300	major facilitator superfamily-related transporter, putative	MFR5	-0.50811	0.0127503
PBANKA_1359200	DNA/RNA-binding protein Alba 2, putative	ALBA2	-0.508079	0.0023856
PBANKA_1121800	AP2 domain transcription factor AP2-SP3	AP2-SP3	-0.507882	0.0799945
PBANKA_0933200	conserved Plasmodium protein, unknown function		-0.507456	0.084671
PBANKA_1351700	LMBR1 domain-containing protein, putative		-0.507064	0.00361909
PBANKA_0931500	folate transporter 2	FT2	-0.506737	0.0128826
PBANKA_0407900	YTH domain-containing protein 2, putative	YTH2	-0.506043	0.0525176
PBANKA_1017900	phosphoenolpyruvate carboxylase	PEPC	-0.504464	0.0661417
PBANKA_0207100	EF hand domain-containing protein, putative		-0.504178	0.113163
PBANKA_1120900	conserved Plasmodium protein, unknown function		-0.504039	0.185355
PBANKA_1107900	triose phosphate transporter	TPT	-0.503111	0.0394855
PBANKA_1348500	Voldacs domain-containing protein, putative		-0.501789	0.0163678
PBANKA_1135200	GTP-binding protein, putative		-0.501751	0.0188817
PBANKA_0939300	coiled-coil domain-containing protein 40, putative		-0.501247	0.0360156
PBANKA_0612861	tRNA Glutamic acid		-0.501119	0.714607
PBANKA_1114000	aspartate--tRNA ligase, putative		-0.501093	0.106367
PBANKA_0402800	EH domain-containing protein, putative	EHD	-0.500335	0.0560386
PBANKA_1018400	protein arginine N-methyltransferase 1, putative	PRMT1	-0.49968	0.0377669
PBANKA_0811500	conserved protein, unknown function		-0.499185	0.111204
PBANKA_1428500	glycerol-3-phosphate 1-O-acyltransferase, putative		-0.498517	0.0405601
PBANKA_1118500	conserved Plasmodium protein, unknown function		-0.498431	0.0190742
PBANKA_1400081	PIR protein		-0.498189	0.275917
PBANKA_1428000	conserved protein, unknown function		-0.498071	0.0219849
PBANKA_1455700	conserved Plasmodium protein, unknown function		-0.496166	0.0753251
PBANKA_1451700	conserved Plasmodium protein, unknown function		-0.494295	0.0331886
PBANKA_0930200	DNA mismatch repair protein MLH, putative	MLH	-0.494019	0.00860982
PBANKA_1200800	transformer-2 protein homolog beta, putative	TRA2B	-0.494008	0.00669118
PBANKA_1201600	ribosome-binding factor A, putative		-0.49339	0.011297
PBANKA_0508600	conserved Plasmodium protein, unknown function		-0.492902	0.0162891
PBANKA_0600900	conserved protein, unknown function		-0.491751	0.0459593
PBANKA_0941400	centrin-4	CEN4	-0.491604	0.0785843
PBANKA_0823600	pre-mRNA-splicing factor 18, putative	PRP18	-0.490208	0.0267942
PBANKA_1323000	conserved protein, unknown function		-0.489998	0.0650921
PBANKA_0408000	conserved Plasmodium protein, unknown function		-0.489241	0.0379596
PBANKA_0404700	glutaredoxin 1, putative	GRX1	-0.488457	0.0156718
PBANKA_0512300	RING zinc finger protein, putative		-0.488208	0.0222482
PBANKA_1237300	magnesium transporter NIPA, putative		-0.488075	0.0394989
PBANKA_1125100	3-oxoacyl-acyl-carrier protein synthase, putative	FabB/FabF	-0.488003	0.358486
PBANKA_1349400	DNA replication complex GINS protein, putative		-0.487134	0.257732
PBANKA_1350300	RanBPM and CLTH-like protein, putative		-0.486403	0.0248017
PBANKA_0202500	P-loop containing nucleoside triphosphate hydrolase, putative		-0.48601	0.0182489
PBANKA_1018200	MORN repeat protein, putative		-0.485596	0.15971
PBANKA_1431300	conserved protein, unknown function		-0.484428	0.0963204
PBANKA_1013600	PhIL1 interacting protein PIP2, putative	PIP2	-0.483988	0.191728
PBANKA_1119800	conserved Plasmodium protein, unknown function		-0.483983	0.177741
PBANKA_0107200	conserved Plasmodium protein, unknown function		-0.483485	0.105915
PBANKA_0412700	zinc finger protein, putative		-0.483307	0.0339058
PBANKA_0206000	ATP synthase-associated protein, putative		-0.482901	0.00966721
PBANKA_1345800	RNA-binding protein, putative		-0.482725	0.00987203
PBANKA_0603900	HAD domain ookinete protein	HADO	-0.482457	0.127168
PBANKA_0932100	palmitoyltransferase DHHC9	DHHC9	-0.482346	0.0033496
PBANKA_1441900	DNA helicase 60, putative	DH60	-0.48194	0.0156493
PBANKA_0104200	calcium-binding protein, putative		-0.481922	0.135321
PBANKA_0416400	ATP synthase-associated protein, putative		-0.481746	0.0394855
PBANKA_0802500	protein phosphatase PPM12, putative	PPM12	-0.481404	0.196399
PBANKA_0612400	AP2 domain transcription factor AP2-Z	AP2-Z	-0.480769	0.0740145
PBANKA_0313000	conserved Plasmodium protein, unknown function		-0.478979	0.0731054
PBANKA_0812300	spindle and kinetochore-associated protein 1, putative	SKA1	-0.477027	0.0215129
PBANKA_1124300	conserved Plasmodium protein, unknown function		-0.476945	0.0549993
PBANKA_1119300	ATP synthase-associated protein, putative		-0.476853	0.0141993
PBANKA_0814150	conserved protein, unknown function		-0.476526	0.695249
PBANKA_1204300	CCR4-NOT transcription complex subunit 5, putative	NOT5	-0.476278	0.0105446
PBANKA_1427000	protein phosphatase PPM7	PPM7	-0.475974	0.0489827
PBANKA_1325500	conserved Plasmodium protein, unknown function		-0.473407	0.0250657
PBANKA_1031700	ankyrin-repeat protein, putative		-0.47281	0.175164
PBANKA_1408600	conserved Plasmodium protein, unknown function		-0.472081	0.0668929
PBANKA_1145751	tRNA Cysteine		-0.471865	0.40289
PBANKA_1353100	conserved Plasmodium protein, unknown function		-0.471816	0.0361931
PBANKA_1113400	secreted ookinete protein	PSOP12	-0.471518	0.0386393
PBANKA_1332500	pre-rRNA-processing protein PNO1, putative	PNO1	-0.471486	0.017073
PBANKA_0801700	conserved Plasmodium protein, unknown function		-0.471457	0.0553077
PBANKA_1363000	small nuclear ribonucleoprotein E, putative	SNRPE	-0.470808	0.00613675
PBANKA_1117200	conserved Plasmodium protein, unknown function		-0.470516	0.0770896
PBANKA_1125400	conserved Plasmodium protein, unknown function		-0.470327	0.105915
PBANKA_0621900	mitochondrial import inner membrane translocase subunit TIM14, putative	PAM18	-0.470092	0.0733679
PBANKA_1339900	SNARE protein, putative		-0.470091	0.0302248
PBANKA_1343500	conserved protein, unknown function		-0.469897	0.03435
PBANKA_0210300	seipin domain-containing protein, putative		-0.469176	0.0210593
PBANKA_1143200	conserved Plasmodium protein, unknown function		-0.46793	0.139511
PBANKA_1343200	conserved Plasmodium protein, unknown function		-0.467559	0.0188455
PBANKA_1024800	ATP synthase-associated protein, putative		-0.467549	0.0134166
PBANKA_0407800	SECIS-binding protein 2, putative	SBP2	-0.467144	0.0447462
PBANKA_1038500	dynein light chain, putative		-0.466509	0.146143
PBANKA_0616000	ribosomal protein S8, mitochondrial, putative		-0.466387	0.226875
PBANKA_0821800	U4/U6 snRNA-associated-splicing factor, putative	PRP24	-0.466146	0.01693
PBANKA_0917980	small nucleolar RNA snoR14a		-0.465587	0.112488
PBANKA_0930400	peptidyl-tRNA hydrolase ICT1, putative	ICT1	-0.46557	0.0891674
PBANKA_0106100	4-hydroxybenzoate polyprenyltransferase, putative	COQ2	-0.464072	0.144097
PBANKA_1024700	ubiquitin fusion degradation protein 1, putative	UFD1	-0.463312	0.0496244
PBANKA_0301200	ERCC1 nucleotide excision repair protein, putative	ERCC1	-0.463029	0.0610376
PBANKA_1451800	conserved Plasmodium protein, unknown function		-0.462367	0.0229448
PBANKA_0703700	ATP-dependent RNA helicase DBP10, putative	DBP10	-0.461665	0.0289047
PBANKA_0509500	conserved protein, unknown function		-0.461615	0.0657808
PBANKA_0814800	conserved Plasmodium protein, unknown function		-0.461002	0.234218
PBANKA_0304700	serine repeat antigen 5	SERA5	-0.460889	0.489061
PBANKA_1332300	Golgi SNAP receptor complex member 1, putative		-0.460542	0.0391126
PBANKA_1444600	dynein regulatory complex subunit 7, putative		-0.460438	0.160293
PBANKA_1143100	CLAMP domain-containing protein, putative		-0.459936	0.184008
PBANKA_1301600	vacuole membrane protein 1, putative	VMP1	-0.459705	0.0671241
PBANKA_0712000	U3 small nucleolar ribonucleoprotein protein IMP4, putative	IMP4	-0.459672	0.00620983
PBANKA_1302241	tRNA Selenocysteine		-0.459469	0.466278
PBANKA_1426500	cullin-1	CUL1	-0.458736	0.0290227
PBANKA_1213400	FAD synthetase, putative		-0.458691	0.279934
PBANKA_1323700	FYVE and coiled-coil domain-containing protein, putative	FCP	-0.45862	0.0516365
PBANKA_1443600	conserved Plasmodium protein, unknown function		-0.458572	0.0747921
PBANKA_0209400	L-seryl-tRNA(Sec) kinase, putative	PSTK	-0.458545	0.105529
PBANKA_1327800	zinc finger protein, putative		-0.45833	0.0414479
PBANKA_1415300	protein transport protein SEC20, putative	SEC20	-0.458006	0.0232209
PBANKA_1234100	protoheme IX farnesyltransferase, putative	COX10	-0.457584	0.0331944
PBANKA_0520200	ADP,ATP carrier protein 1, putative	AAC1	-0.457561	0.0236529
PBANKA_1121300	conserved protein, unknown function		-0.456626	0.124287
PBANKA_1428400	tetratricopeptide repeat protein, putative		-0.455995	0.0257853
PBANKA_0410400	glycogen synthase kinase-3 beta, putative	GSK3beta	-0.454678	0.0193597
PBANKA_0106800	conserved Plasmodium protein, unknown function		-0.45411	0.0404901
PBANKA_1427600	conserved Plasmodium protein, unknown function		-0.453568	0.0673322
PBANKA_0814000	conserved protein, unknown function		-0.453355	0.0714135
PBANKA_1460100	conserved protein, unknown function		-0.452746	0.375899
PBANKA_0833200	peptide chain release factor 1, putative	RF1	-0.451753	0.0153953
PBANKA_1350000	WPP motif-containing protein, putative		-0.45098	0.0191348
PBANKA_1244300	RING zinc finger protein, putative		-0.450507	0.0359971
PBANKA_1018800	conserved Plasmodium protein, unknown function		-0.448998	0.0232477
PBANKA_1237500	pre-mRNA-splicing factor BUD31, putative	BUD31	-0.448768	0.142416
PBANKA_1006600	conserved Plasmodium protein, unknown function		-0.448618	0.0397806
PBANKA_1213800	RMI1 domain-containing protein, putative		-0.447229	0.0493132
PBANKA_1009000	GTPase Era, putative	ERA	-0.446496	0.111578
PBANKA_0107000	respiratory chain complex 4 associated protein 4, putative		-0.446424	0.0634807
PBANKA_0405800	spindle and kinetochore-associated protein 2, putative	SKA2	-0.445924	0.00746072
PBANKA_0006300	PIR protein		-0.445851	0.846101
PBANKA_0822900	dynein intermediate chain, putative		-0.445467	0.0899998
PBANKA_1460600	uroporphyrinogen-III synthase, putative		-0.444832	0.0930038
PBANKA_0111500	conserved Plasmodium protein, unknown function		-0.4442	0.100018
PBANKA_1027700	uracil-DNA glycosylase, putative	UDG	-0.444176	0.0916458
PBANKA_0201051	conserved rodent malaria protein, unknown function		-0.443853	0.512145
PBANKA_0521700	AP2 domain transcription factor, putative	ApiAP2	-0.443056	0.0528598
PBANKA_1242400	conserved Plasmodium protein, unknown function	POLD3	-0.442426	0.0466527
PBANKA_1230900	RAP protein, putative		-0.44126	0.120136
PBANKA_1214100	tubulin binding cofactor c, putative		-0.440869	0.0442547
PBANKA_0211300	cysteine desulfurase IscS, putative	NFS1	-0.440502	0.0668929
PBANKA_1222200	protein MPODD	MPODD	-0.440311	0.0775298
PBANKA_1363100	conserved protein, unknown function		-0.438628	0.0236841
PBANKA_1236100	ribosomal large subunit pseudouridylate synthase, putative		-0.438501	0.259674
PBANKA_0911700	subtilisin-like protease 2	SUB2	-0.438331	0.0791894
PBANKA_1000900	conserved Plasmodium protein, unknown function		-0.438184	0.231348
PBANKA_1105500	mediator of RNA polymerase II transcription subunit 11, putative	MED11	-0.437814	0.0933358
PBANKA_1447300	conserved Plasmodium protein, unknown function		-0.437661	0.289772
PBANKA_0110500	leucine-rich repeat protein	LRR6	-0.437435	0.125857
PBANKA_1338400	V-type proton ATPase subunit G, putative		-0.437024	0.0278795
PBANKA_1215300	conserved Plasmodium protein, unknown function		-0.436888	0.0757355
PBANKA_1124600	conserved protein, unknown function		-0.436348	0.0741642
PBANKA_0510800	conserved Plasmodium protein, unknown function		-0.435825	0.0370073
PBANKA_1350200	conserved Plasmodium protein, unknown function		-0.43567	0.0349654
PBANKA_0112300	filamin domain-containing protein, putative		-0.435517	0.0342876
PBANKA_1312200	ubiquitin-protein ligase, putative		-0.43484	0.0976493
PBANKA_0601000	ATP-dependent DNA/RNA helicase PSH2, putative	PSH2	-0.434828	0.0619965
PBANKA_1035500	vacuolar protein sorting-associated protein 29, putative	VPS29	-0.434702	0.0905166
PBANKA_1411700	peptidyl-prolyl cis-trans isomerase, putative		-0.433226	0.0743008
PBANKA_1009700	ribonuclease H2 subunit B, putative		-0.43229	0.318745
PBANKA_0924700	RAP protein, putative		-0.429964	0.03435
PBANKA_0407400	aurora-related kinase ARK2	ARK2	-0.429845	0.0605428
PBANKA_0211600	mTERF domain-containing protein, putative		-0.429567	0.0381716
PBANKA_0602200	signal recognition particle subunit SRP14, putative	SRP14	-0.429145	0.188595
PBANKA_1333000	mediator of RNA polymerase II transcription subunit 22, putative	MED22	-0.42899	0.0727583
PBANKA_0721300	protein transport protein GOT1, putative	GOT1	-0.428243	0.0736721
PBANKA_1338500	N-acetyltransferase, GNAT family, putative		-0.427696	0.047509
PBANKA_0105800	RING zinc finger protein, putative		-0.425565	0.0386099
PBANKA_1107600	6-cysteine protein P38, putative	P38	-0.424697	0.0588662
PBANKA_1345100	conserved Plasmodium protein, unknown function		-0.424335	0.10184
PBANKA_1205400	rho GTPase-activating protein, putative		-0.424248	0.0187845
PBANKA_0935600	conserved protein, unknown function		-0.423424	0.108191
PBANKA_0102300	cation/H+ antiporter	CAX	-0.423409	0.106774
PBANKA_1429300	integral membrane protein GPR180	GPR180	-0.423235	0.0689824
PBANKA_1319400	conserved Plasmodium protein, unknown function		-0.42177	0.109361
PBANKA_0400700	fam-a protein, pseudogene		-0.421522	0.543336
PBANKA_0829800	transcription initiation factor TFIID subunit 7, putative	TAF7	-0.421153	0.0370409
PBANKA_0830500	conserved Plasmodium protein, unknown function		-0.421088	0.388395
PBANKA_1400300	PIR protein		-0.419797	0.337494
PBANKA_0314300	conserved Plasmodium protein, unknown function		-0.41885	0.155498
PBANKA_0611500	conserved Plasmodium protein, unknown function		-0.418808	0.273394
PBANKA_0612100	conserved protein, unknown function		-0.417494	0.0593658
PBANKA_1216000	iron-sulfur assembly protein, putative		-0.416531	0.145242
PBANKA_0620800	conserved protein, unknown function		-0.416377	0.0557722
PBANKA_0418300	protein RER1, putative	RER1	-0.416162	0.061621
PBANKA_0204100	N-acetyltransferase, GNAT family, putative		-0.416145	0.107018
PBANKA_1110300	WD repeat-containing protein, putative		-0.416132	0.26188
PBANKA_0702100	folate transporter 1, putative	FT1	-0.415355	0.189811
PBANKA_1430700	conserved protein, unknown function		-0.415021	0.019575
PBANKA_0404400	cytochrome b-c1 complex subunit 8, putative	QCR8	-0.414441	0.0358273
PBANKA_1341100	respiratory chain complex 3 associated protein 2, putative		-0.413971	0.0270536
PBANKA_0928900	conserved protein, unknown function		-0.413167	0.141941
PBANKA_1146721	PIR protein		-0.412726	0.30093
PBANKA_0706900	mitochondrial import receptor subunit TOM7, putative	TOM7	-0.412509	0.129077
PBANKA_0502800	tRNA wybutosine-synthesizing protein, putative		-0.412075	0.143408
PBANKA_1462300	conserved Plasmodium protein, unknown function		-0.411796	0.108897
PBANKA_0828900	conserved Plasmodium protein, unknown function		-0.411179	0.20194
PBANKA_1445900	conserved Plasmodium protein, unknown function		-0.410914	0.0545181
PBANKA_0415800	WD repeat-containing protein 66, putative	WDR66	-0.410683	0.157759
PBANKA_1115100	gametogenesis essential protein 1, putative	GEP1	-0.408096	0.042052
PBANKA_0925800	protein KIC10, putative		-0.407912	0.0282949
PBANKA_1125900	ankyrin-repeat protein, putative		-0.407432	0.18198
PBANKA_1434000	phosphate translocator, putative		-0.406035	0.0658569
PBANKA_0214000	dynein heavy chain, putative	DHC3	-0.405529	0.108433
PBANKA_0909700	VPS9 domain-containing protein, putative		-0.405188	0.0864919
PBANKA_1126300	conserved Plasmodium protein, unknown function		-0.404771	0.174023
PBANKA_1001700	conserved Plasmodium protein, unknown function		-0.404042	0.333277
PBANKA_0609000	conserved Plasmodium protein, unknown function		-0.403146	0.178185
PBANKA_0923000	DNA-directed RNA polymerase, putative	mtRNAP	-0.401691	0.0232477
PBANKA_1310900	conserved Plasmodium protein, unknown function		-0.400836	0.0787449
PBANKA_0412300	conserved protein, unknown function		-0.400554	0.0443946
PBANKA_1004400	ribosomal protein L25, putative		-0.400418	0.0759417
PBANKA_1333200	autophagy-related protein 12, putative	ATG12	-0.400273	0.0975622
PBANKA_1431500	radial spoke protein 9	RSP9	-0.400065	0.320584
PBANKA_0417800	protein hook, putative		-0.399709	0.027908
PBANKA_1360900	GTPase, putative		-0.398961	0.141795
PBANKA_1439500	cytochrome c heme lyase	CCHL	-0.398525	0.0919552
PBANKA_1130300	reactive oxygen species modulator 1, putative	ROMO1	-0.398397	0.156037
PBANKA_0103000	ribosomal protein L41, mitochondrial, putative		-0.397898	0.0842832
PBANKA_0708100	dynein light chain 1	DLC1	-0.396721	0.231133
PBANKA_1303500	cytochrome c oxidase subunit NDUFA4, putative	NDUFA4	-0.396644	0.0256688
PBANKA_1029600	conserved Plasmodium protein, unknown function		-0.396256	0.144211
PBANKA_1406100	DNA-directed RNA polymerase subunit alpha, putative		-0.395117	0.0659807
PBANKA_0401900	DNA-directed RNA polymerases I, II, and III subunit RPABC2, putative	RPB6	-0.394229	0.0206068
PBANKA_1462100	conserved Plasmodium protein, unknown function		-0.393777	0.172638
PBANKA_0827600	conserved Plasmodium protein, unknown function		-0.393054	0.103755
PBANKA_0520700	WD repeat-containing protein, putative		-0.392188	0.232159
PBANKA_1330500	WD repeat-containing protein 79, putative	WDR79	-0.391934	0.177277
PBANKA_1410200	cytochrome c, putative		-0.391484	0.235483
PBANKA_1108600	alpha-soluble NSF attachment protein, putative		-0.391479	0.0613874
PBANKA_0310100	mitochondrial respiratory chain complex II subunit, putative		-0.391342	0.118301
PBANKA_1133600	dynein light chain, putative		-0.391325	0.328088
PBANKA_1402500	condensin complex subunit 2, putative	CAPH	-0.390074	0.221024
PBANKA_1356600	UDP-N-acetylglucosamine pyrophosphorylase, putative		-0.389917	0.396321
PBANKA_1348200	conserved Plasmodium protein, unknown function		-0.389654	0.054614
PBANKA_1022400	dynein light chain, putative		-0.388169	0.244092
PBANKA_0915800	pre-mRNA-splicing factor 38A, putative	PRP38A	-0.388153	0.0432552
PBANKA_1010900	protein kinase, putative		-0.388098	0.103478
PBANKA_1119100	splicing factor 3A subunit 2, putative	SF3A2	-0.387549	0.0923923
PBANKA_0414800	arginase		-0.387441	0.0817541
PBANKA_1111600	prefoldin subunit 6, putative		-0.387056	0.125857
PBANKA_1242900	conserved protein, unknown function		-0.386489	0.264189
PBANKA_0110200	lsm12, putative		-0.385167	0.0535625
PBANKA_0716500	male development protein MD5	MD5	-0.383528	0.203045
PBANKA_1347600	eukaryotic translation initiation factor 6, putative		-0.383484	0.210229
PBANKA_0715400	ATP synthase-associated protein, putative		-0.382955	0.0727583
PBANKA_0940400	conserved Plasmodium protein, unknown function		-0.381609	0.143994
PBANKA_1365721	conserved rodent malaria protein, unknown function		-0.38075	0.586036
PBANKA_0609200	conserved Plasmodium protein, unknown function		-0.380543	0.0753957
PBANKA_1434900	raf kinase inhibitor, putative	RKIP	-0.380245	0.232695
PBANKA_0708200	conserved Plasmodium protein, unknown function		-0.379766	0.161156
PBANKA_0719100	conserved Plasmodium protein, unknown function		-0.379009	0.0466527
PBANKA_1437800	conserved Plasmodium protein, unknown function		-0.378333	0.139946
PBANKA_0403500	elongation factor (EF-TS), putative	EF-Ts	-0.378214	0.374645
PBANKA_0100800	zinc finger protein, putative		-0.378063	0.128311
PBANKA_0502400	conserved Plasmodium protein, unknown function		-0.377567	0.366425
PBANKA_0621100	proteasome assembly chaperone 4, putative		-0.377226	0.267171
PBANKA_0910800	conserved Plasmodium protein, unknown function		-0.377172	0.339889
PBANKA_1208300	heptatricopeptide repeat-containing protein, putative		-0.377092	0.3212
PBANKA_0924000	bromodomain protein 7, putative	BDP7	-0.376804	0.0438115
PBANKA_1229400	F-box protein FBXO6, putative		-0.376502	0.189893
PBANKA_0829000	conserved Plasmodium protein, unknown function		-0.37628	0.138285
PBANKA_1446400	conserved protein, unknown function		-0.375758	0.246866
PBANKA_0314900	SUZ domain-containing protein, putative		-0.375036	0.166809
PBANKA_1454800	female development protein FD1	FD1	-0.374417	0.133955
PBANKA_0835700	conserved Plasmodium protein, unknown function		-0.374353	0.447199
PBANKA_1241700	transmembrane emp24 domain-containing protein, putative		-0.374177	0.0255017
PBANKA_0925500	calcium-dependent protein kinase 6	CDPK6	-0.372323	0.072951
PBANKA_0404900	cytochrome c oxidase subunit 6c, putative		-0.371868	0.0568708
PBANKA_1458200	5-formyltetrahydrofolate cyclo-ligase, putative		-0.371853	0.147324
PBANKA_0803800	conserved protein, unknown function		-0.371651	0.227587
PBANKA_0519600	conserved protein, unknown function		-0.371404	0.0486891
PBANKA_1236300	ATP-dependent RNA helicase DDX1, putative	DDX1	-0.371213	0.177114
PBANKA_1146200	Plasmodium exported protein, unknown function		-0.369551	0.263314
PBANKA_0826200	protein phosphatase-beta, putative		-0.369258	0.10759
PBANKA_1300021	PIR protein		-0.369053	0.841853
PBANKA_0504200	RNA-binding protein 34, putative	RBM34	-0.368664	0.0897257
PBANKA_0810100	conserved Plasmodium protein, unknown function		-0.367787	0.225691
PBANKA_0710300	protein transport protein YIF1, putative	YIF1	-0.367705	0.147347
PBANKA_1128700	CRAL/TRIO domain-containing protein, putative		-0.367491	0.0624659
PBANKA_0711100	conserved Plasmodium protein, unknown function		-0.36662	0.317052
PBANKA_1422700	superoxide dismutase [Fe], putative	FeSOD	-0.366303	0.0747608
PBANKA_1026500	metacaspase-3, putative	MCA3	-0.365632	0.111439
PBANKA_1328900	potassium channel K2	K2	-0.365179	0.328968
PBANKA_1354300	sodium-dependent phosphate transporter, putative	PiT	-0.364241	0.0896394
PBANKA_1314900	conserved Plasmodium protein, unknown function		-0.363195	0.276316
PBANKA_1204900	conserved Plasmodium protein, unknown function		-0.363024	0.148455
PBANKA_1033300	conserved Plasmodium protein, unknown function		-0.362156	0.0313427
PBANKA_1214500	conserved Plasmodium protein, unknown function		-0.361685	0.490533
PBANKA_1004100	NYN domain-containing protein, putative		-0.361106	0.0731898
PBANKA_0307900	conserved Plasmodium protein, unknown function		-0.360914	0.374843
PBANKA_1348300	U3 small nucleolar RNA-associated protein 4, putative	UTP4	-0.359272	0.118977
PBANKA_1343100	conserved Plasmodium protein, unknown function		-0.358619	0.452125
PBANKA_0313200	WD repeat-containing protein, putative		-0.358483	0.217485
PBANKA_1111800	glutathione synthetase	GS	-0.357795	0.302423
PBANKA_1317600	conserved Plasmodium protein, unknown function		-0.357192	0.102312
PBANKA_1227900	periodic tryptophan protein 2, putative	PWP2	-0.357137	0.305632
PBANKA_1113500	ras-related protein Rab-1A, putative	RAB1a	-0.356004	0.145749
PBANKA_0804300	DNA mismatch repair protein MSH2	MSH2-2	-0.355003	0.278755
PBANKA_0701800	conserved protein, unknown function		-0.354716	0.0901394
PBANKA_1123000	conserved protein, unknown function		-0.354623	0.0693441
PBANKA_1244100	heptatricopeptide repeat-containing protein, putative		-0.354345	0.279255
PBANKA_1141500	SNARE associated Golgi protein, putative		-0.353377	0.0674328
PBANKA_0829400	conserved Plasmodium protein, unknown function		-0.353237	0.225438
PBANKA_0714400	EF-hand calcium-binding domain-containing protein, putative		-0.35294	0.106228
PBANKA_0816600	conserved Plasmodium protein, unknown function		-0.352793	0.0903915
PBANKA_0936100	acylphosphatase, putative		-0.352273	0.26792
PBANKA_0504500	cytoplasmic dynein intermediate chain, putative		-0.35192	0.130052
PBANKA_0713700	tRNA modification GTPase, putative		-0.350246	0.207926
PBANKA_1336400	DnaJ protein, putative		-0.349167	0.0700976
PBANKA_0917400	armadillo repeat protein PF16	PF16	-0.348889	0.225612
PBANKA_0815000	pseudouridylate synthase, putative		-0.348682	0.282115
PBANKA_1304400	allantoicase, putative		-0.348605	0.227981
PBANKA_1433900	AP-2 complex subunit mu, putative	AP2-MU	-0.348296	0.216488
PBANKA_0930100	conserved Plasmodium protein, unknown function		-0.347837	0.177078
PBANKA_1315900	aminomethyltransferase, putative		-0.347609	0.239377
PBANKA_0311900	RING zinc finger protein, putative		-0.346485	0.0496373
PBANKA_0613100	conserved Plasmodium protein, unknown function		-0.346408	0.147324
PBANKA_0805300	conserved Plasmodium protein, unknown function		-0.346007	0.128826
PBANKA_1215500	translation machinery-associated protein 7, putative	TMA7	-0.345931	0.0968081
PBANKA_0617900	apoptosis-inducing factor, putative	AIF	-0.345607	0.177741
PBANKA_1202300	dynein attachment factor-domain containing protein, putative		-0.345293	0.261004
PBANKA_0306000	6-cysteine protein P230p	P230p	-0.345286	0.1965
PBANKA_0822000	conserved Plasmodium protein, unknown function		-0.345272	0.250549
PBANKA_0916600	oxysterol-binding protein, putative		-0.344795	0.184957
PBANKA_0701600	coiled-coil domain-containing protein 124, putative	CCDC124	-0.344694	0.109361
PBANKA_1345600	elongation factor Tu, putative		-0.34402	0.0863343
PBANKA_1363900	CXXC motif containing zinc binding protein, putative		-0.343556	0.142899
PBANKA_1334600	diacylglycerol kinase, putative		-0.34331	0.161499
PBANKA_0819500	ATP-dependent DNA helicase Q1, putative	RECQ1	-0.343211	0.124008
PBANKA_1238100	cytochrome c oxidase subunit ApiCOX18, putative		-0.342943	0.150898
PBANKA_1132100	splicing factor 3B subunit 5, putative	SF3B5	-0.341333	0.149824
PBANKA_1433500	PPPDE peptidase domain-containing protein, putative		-0.34102	0.224313
PBANKA_1344200	conserved Plasmodium protein, unknown function		-0.340656	0.206076
PBANKA_0716200	calmodulin-like protein, putative		-0.339838	0.21184
PBANKA_0517900	conserved protein, unknown function		-0.338949	0.345711
PBANKA_0904300	apicoplast import protein Tic20, putative	TIC20	-0.338856	0.392699
PBANKA_1219600	cg1 protein, putative		-0.338482	0.157303
PBANKA_1330000	enkurin domain-containing protein, putative		-0.338383	0.267739
PBANKA_0209000	protein E140, putative		-0.338175	0.189719
PBANKA_0507800	conserved protein, unknown function		-0.338163	0.233283
PBANKA_0603500	cytidine deaminase, putative		-0.33772	0.43098
PBANKA_1106100	conserved Plasmodium protein, unknown function		-0.336909	0.171308
PBANKA_0401400	RNA-binding protein, putative		-0.336667	0.0671241
PBANKA_0304500	conserved Plasmodium protein, unknown function		-0.336655	0.120136
PBANKA_1313500	conserved protein, unknown function		-0.33656	0.139946
PBANKA_1013000	inner membrane complex suture component, putative	ISC3	-0.336376	0.27801
PBANKA_0311300	conserved Plasmodium protein, unknown function		-0.335993	0.38753
PBANKA_1335200	pre-mRNA-splicing factor ISY1, putative	ISY1	-0.334692	0.164089
PBANKA_1459600	methyltransferase, putative		-0.333448	0.224065
PBANKA_1036500	RING zinc finger protein, putative		-0.332732	0.111961
PBANKA_0212300	actin-like protein, putative	ALP3	-0.332452	0.200954
PBANKA_0413500	STONES protein	STONES	-0.332443	0.0717145
PBANKA_1221900	conserved Plasmodium protein, unknown function		-0.332243	0.175874
PBANKA_1222900	26S proteasome regulatory subunit RPN10, putative	RPN10	-0.330304	0.1233
PBANKA_0824900	patatin-like phospholipase 3, putative		-0.329997	0.153873
PBANKA_0608200	ATP synthase mitochondrial F1 complex assembly factor 1, putative	ATP11	-0.32958	0.108121
PBANKA_0511500	DNA-directed RNA polymerase II subunit RPB7, putative	RPB7	-0.329093	0.118755
PBANKA_1009500	glutamate synthase [NADH], putative		-0.32717	0.097041
PBANKA_1140000	conserved protein, unknown function		-0.325365	0.110487
PBANKA_1449700	conserved protein, unknown function		-0.325345	0.22538
PBANKA_1425700	conserved Plasmodium protein, unknown function		-0.325019	0.347748
PBANKA_0408700	trafficking protein particle complex subunit 4, putative	TRAPPC4	-0.323705	0.0983993
PBANKA_1038800	EGF domain-containing protein, putative		-0.323101	0.200722
PBANKA_1362600	GPN-loop GTPase, putative		-0.322969	0.256329
PBANKA_0206800	conserved Plasmodium protein, unknown function		-0.322271	0.222217
PBANKA_0833700	conserved Plasmodium protein, unknown function		-0.321204	0.260817
PBANKA_1209600	BET1-like protein, putative	BET1	-0.321026	0.219519
PBANKA_1023600	conserved Plasmodium protein, unknown function		-0.320289	0.0613397
PBANKA_0935300	conserved Plasmodium protein, unknown function		-0.319189	0.164419
PBANKA_0203650	respiratory chain complex 2 associated protein 3, putative		-0.318935	0.249234
PBANKA_0212000	conserved Plasmodium protein, unknown function		-0.318227	0.418544
PBANKA_0106200	spindle assembly abnormal protein 6	SAS6	-0.317965	0.274998
PBANKA_0821500	conserved Plasmodium protein, unknown function		-0.317842	0.215823
PBANKA_0718900	conserved Plasmodium protein, unknown function		-0.317205	0.207472
PBANKA_0926100	JmjC domain-containing protein 3, putative	JmjC3	-0.317084	0.28029
PBANKA_1144300	ribosomal protein L1, putative		-0.314732	0.204289
PBANKA_1107700	SET domain protein, putative	SET9	-0.314626	0.0791894
PBANKA_0204200	tubulin-specific chaperone a, putative		-0.313926	0.224379
PBANKA_0300900	conserved Plasmodium protein, unknown function		-0.313683	0.152079
PBANKA_0928200	conserved protein, unknown function		-0.313608	0.0878362
PBANKA_0415100	conserved Plasmodium protein, unknown function		-0.313288	0.197209
PBANKA_1135500	high mobility group protein B4, putative	HMGB4	-0.31328	0.151336
PBANKA_1316800	dynactin subunit 4, putative		-0.313237	0.27925
PBANKA_0702400	conserved protein, unknown function		-0.313042	0.111961
PBANKA_0822100	conserved Plasmodium protein, unknown function		-0.312924	0.126833
PBANKA_0402900	conserved Plasmodium protein, unknown function		-0.312654	0.157493
PBANKA_1453300	acyl-CoA synthetase, putative	ACS11	-0.311993	0.156693
PBANKA_1409000	ER membrane protein complex subunit 7, putative	EMC7	-0.311489	0.211122
PBANKA_1457300	glucose inhibited division protein a homologue, putative		-0.311186	0.190445
PBANKA_0810900	FHA domain protein, putative		-0.30939	0.154239
PBANKA_1227100	U3 small nucleolar RNA-associated protein 14, putative	UTP14	-0.309149	0.112029
PBANKA_1145000	conserved Plasmodium protein, unknown function		-0.307893	0.319209
PBANKA_0704700	conserved Plasmodium protein, unknown function		-0.307871	0.270974
PBANKA_1037500	adenylyl cyclase alpha	ACalpha	-0.307486	0.37957
PBANKA_1400011	PIR protein, pseudogene		-0.306473	0.893584
PBANKA_0938050	small nucleolar RNA snoR07		-0.306459	0.804843
PBANKA_1359400	conserved Plasmodium protein, unknown function		-0.306095	0.226642
PBANKA_0920300	conserved Plasmodium protein, unknown function		-0.305803	0.116251
PBANKA_1202600	RING finger E3 ubiquitin-protein ligase, putative		-0.305675	0.472411
PBANKA_1222600	AP-3 complex subunit delta, putative		-0.304177	0.173439
PBANKA_1131800	histone-lysine N-methyltransferase, putative		-0.303688	0.307592
PBANKA_0503100	conserved Plasmodium protein, unknown function		-0.303315	0.183641
PBANKA_1337300	conserved protein, unknown function		-0.30301	0.279228
PBANKA_0926600	protein GCN20, putative	GCN20	-0.302525	0.206927
PBANKA_0809700	conserved protein, unknown function		-0.302348	0.108436
PBANKA_0815900	BSD-domain protein, putative		-0.301825	0.215128
PBANKA_1238700	MerC domain-containing protein, putative		-0.301639	0.138188
PBANKA_1300800	cysteine repeat modular protein 4	CRMP4	-0.301627	0.108545
PBANKA_1402800	conserved Plasmodium protein, unknown function		-0.301539	0.259905
PBANKA_0837121	PIR protein		-0.301348	0.569784
PBANKA_1025300	rap guanine nucleotide exchange factor, putative	EPAC	-0.300877	0.199567
PBANKA_1131700	RAP protein, putative		-0.30016	0.279058
PBANKA_0204700	mitochondrial carrier protein, putative		-0.299552	0.129797
PBANKA_1238200	DnaJ protein, putative		-0.298894	0.118301
PBANKA_0702500	leucine--tRNA ligase, putative		-0.298078	0.196428
PBANKA_1210600	rhoptry associated adhesin, putative	RA	-0.296523	0.414808
PBANKA_1306500	TRAP-like protein	TREP	-0.295603	0.632057
PBANKA_1403250	small nucleolar RNA snoR16		-0.295581	0.613838
PBANKA_1424300	NPL domain-containing protein, putative		-0.29519	0.292535
PBANKA_1122800	ribonuclease H2 subunit A, putative		-0.29469	0.222011
PBANKA_1207500	ribonuclease, putative		-0.294605	0.236688
PBANKA_1419900	cGMP-specific 3',5'-cyclic phosphodiesterase gamma, putative	PDEgamma	-0.294092	0.446728
PBANKA_1220000	nucleic acid-binding protein, putative		-0.294059	0.150731
PBANKA_1111300	EKC/KEOPS complex subunit CGI121, putative	CGI121	-0.293879	0.340389
PBANKA_1362000	glutamate--tRNA ligase, putative	GluRS	-0.293248	0.156697
PBANKA_1234900	protein phosphatase PPM9	PPM9	-0.293146	0.133477
PBANKA_0908800	conserved Plasmodium protein, unknown function		-0.292909	0.139511
PBANKA_0509800	cytochrome c oxidase copper chaperone, putative	COX17	-0.292375	0.203361
PBANKA_1453100	sphingomyelin phosphodiesterase, putative		-0.292373	0.517021
PBANKA_0412600	conserved Plasmodium protein, unknown function		-0.292271	0.378245
PBANKA_0622500	exonuclease I, putative		-0.291616	0.314485
PBANKA_0513200	WD repeat-containing protein, putative		-0.290912	0.390126
PBANKA_1245000	XAP-5 DNA binding protein, putative		-0.290619	0.234424
PBANKA_1405600	U3 small nucleolar RNA-associated protein 6, putative	UTP6	-0.290026	0.342528
PBANKA_0618400	tetratricopeptide repeat protein, putative		-0.289421	0.188953
PBANKA_1459200	delta-aminolevulinic acid synthetase	ALAS	-0.288974	0.448881
PBANKA_0902200	protein YIPF6, putative		-0.288672	0.287846
PBANKA_1413300	ubiquitin-like protein, putative		-0.287512	0.350899
PBANKA_1035000	conserved Plasmodium protein, unknown function		-0.287076	0.211557
PBANKA_1355500	casein kinase II beta chain, putative	CK2beta2	-0.286729	0.130806
PBANKA_1022900	DNL-type zinc finger protein, putative	HEP1	-0.285888	0.156697
PBANKA_0503500	zinc finger protein, putative		-0.285451	0.331337
PBANKA_1223700	conserved protein, unknown function		-0.285073	0.407939
PBANKA_0812800	GTP-binding protein, putative		-0.284936	0.341691
PBANKA_1111200	apical rhoptry neck protein, putative	ARNP	-0.284599	0.409224
PBANKA_1460300	GPI mannosyltransferase 2, putative		-0.284289	0.467182
PBANKA_1211900	phosphoinositide-specific phospholipase C	PI-PLC	-0.284066	0.107457
PBANKA_1307100	heptatricopeptide repeat-containing protein, putative		-0.283956	0.249137
PBANKA_0514300	conserved Plasmodium protein, unknown function		-0.282789	0.523635
PBANKA_0612700	golgin subfamily A member 6-like protein, putative		-0.282658	0.341835
PBANKA_1403900	AAR2 protein, putative		-0.282443	0.383354
PBANKA_1007300	peptide chain release factor 2, putative	RF2	-0.282245	0.133955
PBANKA_1113200	mitochondrial import inner membrane translocase subunit TIM16, putative	PAM16	-0.28223	0.291157
PBANKA_0832300	conserved Plasmodium protein, unknown function		-0.282167	0.493195
PBANKA_1455900	conserved protein, unknown function		-0.281601	0.180848
PBANKA_1244000	cell cycle regulator protein, putative		-0.280442	0.230519
PBANKA_0506600	serine/arginine-rich splicing factor 4, putative	SRSF4	-0.280307	0.207896
PBANKA_1442300	kinetochore protein SPC24, putative	SPC24	-0.279956	0.206439
PBANKA_1356500	conserved protein, unknown function		-0.279685	0.145038
PBANKA_0904800	conserved Plasmodium protein, unknown function		-0.279597	0.276316
PBANKA_1219900	Cg7 protein, putative		-0.279544	0.194653
PBANKA_0314700	replication factor C subunit 2, putative	RFC2	-0.279045	0.182746
PBANKA_1322800	GTP-binding protein, putative		-0.278448	0.181936
PBANKA_0933700	mitogen-activated protein kinase 2	MAPK2	-0.27812	0.356677
PBANKA_1311600	calponin homology domain-containing protein, putative		-0.276978	0.254612
[truncated: 3,098 more rows]

## Sheet: Supp. Table 2
Supp. Table 2: Gene Ontology Analysis of RNA-Seq data
Down regulated
ID	Name	Bgd count	Result count	Result gene list	Pct of bgd	Fold enrichment	Odds ratio	P-value	Benjamini	Bonferroni	Ontology
GO:0048870	cell motility	24	10	PBANKA_0622400,PBANKA_0810400,PBANKA_0830400,PBANKA_1225400,PBANKA_1313200,PBANKA_1342500,PBANKA_1353800,PBANKA_1355700,PBANKA_1418900,PBANKA_1436600,	41.7	3.97	6.28	7.10976e-05	0.00270171	0.00270171	BP
GO:0036211	protein modification process	236	39	PBANKA_0110900,PBANKA_0308400,PBANKA_0311400,PBANKA_0407200,PBANKA_0408200,PBANKA_0511000,PBANKA_0512000,PBANKA_0600600,PBANKA_0713800,PBANKA_0810400,PBANKA_0824000,PBANKA_0824500,PBANKA_0829600,PBANKA_0901900,PBANKA_0903800,PBANKA_0907400,PBANKA_0910600,PBANKA_0927300,PBANKA_0932500,PBANKA_1028900,PBANKA_1113700,PBANKA_1133100,PBANKA_1133200,PBANKA_1201700,PBANKA_1224500,PBANKA_1240700,PBANKA_12…	16.5	1.58	1.8	0.00191396	0.0363652	0.0727304	BP
GO:0030154	cell differentiation	4	3	PBANKA_0508300,PBANKA_0712200,PBANKA_0910900,	75	7.15	25.86	0.00421792	0.053427	0.160281	BP
GO:0006486	protein glycosylation	13	5	PBANKA_0308400,PBANKA_0810400,PBANKA_0907400,PBANKA_1224500,PBANKA_1245150,	38.5	3.67	5.41	0.00776469	0.0737646	0.295058	BP
GO:0140013	meiotic nuclear division	3	2	PBANKA_0714000,PBANKA_1325200,	66.7	6.36	17.18	0.0306226	0.193943	1	BP
GO:0005856	cytoskeleton	85	19	PBANKA_0209300,PBANKA_0302200,PBANKA_0402600,PBANKA_0405600,PBANKA_0518100,PBANKA_0712500,PBANKA_0810700,PBANKA_0820200,PBANKA_0929300,PBANKA_0929400,PBANKA_1039000,PBANKA_1103300,PBANKA_1243100,PBANKA_1342500,PBANKA_1355700,PBANKA_1414900,PBANKA_1436600,PBANKA_1444800,PBANKA_1445000,	22.4	2.13	2.56	0.000922138	0.0184428	0.0184428	CC
GO:0008092	cytoskeletal protein binding	43	11	PBANKA_0405600,PBANKA_0609500,PBANKA_0622400,PBANKA_0810700,PBANKA_0929300,PBANKA_1103300,PBANKA_1225500,PBANKA_1232600,PBANKA_1243100,PBANKA_1355700,PBANKA_1459500,	25.6	2.44	3.01	0.00371454	0.118865	0.118865	MF
GO:0016746	acyltransferase activity	50	11	PBANKA_0107800,PBANKA_0505000,PBANKA_0512000,PBANKA_0823800,PBANKA_0824500,PBANKA_0927300,PBANKA_1128100,PBANKA_1201700,PBANKA_1243000,PBANKA_1310700,PBANKA_1338200,	22	2.1	2.46	0.012379	0.198063	0.396127	MF
GO:0016829	lyase activity	36	8	PBANKA_0602600,PBANKA_0818100,PBANKA_1227600,PBANKA_1229500,PBANKA_1304100,PBANKA_1338200,PBANKA_1355900,PBANKA_1423700,	22.2	2.12	2.48	0.0294094	0.3137	0.9411	MF
Up regulated
ID	Name	Bgd count	Result count	Result gene list	Pct of bgd	Fold enrichment	Odds ratio	P-value	Benjamini	Bonferroni	Ontology
GO:0030163	protein catabolic process	54	24	PBANKA_0107100,PBANKA_0205400,PBANKA_0208800,PBANKA_0416800,PBANKA_0502200,PBANKA_0715600,PBANKA_0808200,PBANKA_0817500,PBANKA_0832600,PBANKA_0917900,PBANKA_1039600,PBANKA_1130500,PBANKA_1139400,PBANKA_1209800,PBANKA_1210100,PBANKA_1223100,PBANKA_1226500,PBANKA_1233100,PBANKA_1301400,PBANKA_1318100,PBANKA_1334100,PBANKA_1343300,PBANKA_1404900,PBANKA_1410000,	44.4	2.33	3.51	1.43884e-05	0.000532371	0.000532371	BP
GO:0006457	protein folding	51	16	PBANKA_0107300,PBANKA_0405200,PBANKA_0406500,PBANKA_0916200,PBANKA_0929900,PBANKA_1009400,PBANKA_1109800,PBANKA_1134100,PBANKA_1214000,PBANKA_1216500,PBANKA_1219300,PBANKA_1307800,PBANKA_1437300,PBANKA_1444100,PBANKA_1446800,PBANKA_1460400,	31.4	1.65	1.97	0.0232879	0.268396	0.861652	BP
GO:0055065	metal ion homeostasis	7	4	PBANKA_0713300,PBANKA_1021500,PBANKA_1302900,PBANKA_1438600,	57.1	3	5.7	0.0280425	0.268396	1	BP
GO:0005975	carbohydrate metabolic process	32	11	PBANKA_0823400,PBANKA_0928100,PBANKA_1117700,PBANKA_1122900,PBANKA_1214300,PBANKA_1228400,PBANKA_1318400,PBANKA_1326400,PBANKA_1340100,PBANKA_1340400,PBANKA_1431900,	34.4	1.8	2.25	0.0290158	0.268396	1	BP
GO:0005576	extracellular region	69	34	PBANKA_0100600,PBANKA_0208900,PBANKA_0311700,PBANKA_0316300,PBANKA_0316700,PBANKA_0501100,PBANKA_0501200,PBANKA_0501400,PBANKA_0519200,PBANKA_0519300,PBANKA_0519400,PBANKA_0524200,PBANKA_0524300,PBANKA_0524800,PBANKA_0813000,PBANKA_0813400,PBANKA_0826700,PBANKA_0919100,PBANKA_0926700,PBANKA_0931200,PBANKA_0942500,PBANKA_1003000,PBANKA_1003900,PBANKA_1008500,PBANKA_1032100,PBANKA_1102200,PBANKA_12…	49.3	2.59	4.34	8.84534e-09	2.12288e-07	2.12288e-07	CC
GO:0005622	intracellular	16	8	PBANKA_0107400,PBANKA_0511900,PBANKA_0832600,PBANKA_0916200,PBANKA_1036600,PBANKA_1235600,PBANKA_1318400,PBANKA_1340100,	50	2.62	4.3	0.00502028	0.0602434	0.120487	CC
GO:0031410	cytoplasmic vesicle	68	21	PBANKA_0105400,PBANKA_0211100,PBANKA_0418200,PBANKA_0708000,PBANKA_0826700,PBANKA_0903900,PBANKA_0913700,PBANKA_0926700,PBANKA_0930000,PBANKA_0931200,PBANKA_1008500,PBANKA_1034400,PBANKA_1102200,PBANKA_1128300,PBANKA_1214300,PBANKA_1318100,PBANKA_1334300,PBANKA_1409100,PBANKA_1409900,PBANKA_1434700,PBANKA_1445400,	30.9	1.62	1.94	0.0122184	0.097747	0.293241	CC
GO:0005794	Golgi apparatus	50	15	PBANKA_0105400,PBANKA_0211100,PBANKA_0617400,PBANKA_0720600,PBANKA_0903900,PBANKA_0913700,PBANKA_0930000,PBANKA_1012100,PBANKA_1315500,PBANKA_1328500,PBANKA_1409900,PBANKA_1418300,PBANKA_1434700,PBANKA_1445400,PBANKA_1456400,	30	1.57	1.84	0.0406146	0.243687	0.97475	CC
GO:0008233	peptidase activity	117	39	PBANKA_0107100,PBANKA_0205400,PBANKA_0208800,PBANKA_0304800,PBANKA_0304900,PBANKA_0305000,PBANKA_0305100,PBANKA_0416800,PBANKA_0715600,PBANKA_0808200,PBANKA_0813000,PBANKA_0813900,PBANKA_0832600,PBANKA_0917900,PBANKA_0926200,PBANKA_0932400,PBANKA_1002400,PBANKA_1033200,PBANKA_1034400,PBANKA_1035600,PBANKA_1130500,PBANKA_1209800,PBANKA_1217000,PBANKA_1223100,PBANKA_1226500,PBANKA_1233100,PBANKA_12…	33.3	1.75	2.21	0.000126634	0.00430555	0.00430555	MF
GO:0051082	unfolded protein binding	23	10	PBANKA_0107300,PBANKA_0203000,PBANKA_0405200,PBANKA_0406500,PBANKA_0916200,PBANKA_0929900,PBANKA_1134100,PBANKA_1307800,PBANKA_1437300,PBANKA_1444100,	43.5	2.28	3.31	0.00607789	0.103324	0.206648	MF
GO:0022857	transmembrane transporter activity	15	6	PBANKA_0112500,PBANKA_0302500,PBANKA_0414400,PBANKA_0820400,PBANKA_0827200,PBANKA_1304700,	40	2.1	2.85	0.0491821	0.507385	1	MF
Note:	BP = Biological Processes
	CC = Cellular Component
	MF = Molecular Function

## Sheet: Supp. Table 3
Supp. Table 3: Quantitative proteomics of WT 2 hpa versus WT 0 hpa parasites
Accession	Gene product	Gene symbol	Abundance Ratio (Log2)	Abundance Ratio P-Value	minus log10 p value
PBANKA_0514900	ookinete surface protein P28	P28	4.07	7e-05	4.15483
PBANKA_1134900	zinc finger protein	Pb103	3.55	0.000564078	3.24866
PBANKA_0515000	ookinete surface protein P25	P25	2.42	0.00042148	3.37522
PBANKA_0106300	conserved Plasmodium protein, unknown function	106300	2.39	0.000381465	3.41855
PBANKA_0902900	PH-like domain-containing protein, putative	902900	2.11	0.00017917	3.74674
PBANKA_0612400	AP2 domain transcription factor AP2-Z	AP2-Z	2.01	0.000440785	3.35577
PBANKA_0714000	meiotic recombination protein DMC1	DMC1	1.91	0.000191961	3.71679
PBANKA_1439100	BRO1 domain-containing protein, putative	1439100	1.85	0.000180998	3.74233
PBANKA_0823100	S-adenosylmethionine synthetase, putative	SAMS	1.09	0.480216	0.318563
PBANKA_1116800	BFR1 domain-containing protein, putative	N/A	1	0.243964	0.612674
PBANKA_1035400	glideosome associated protein with multiple membrane spans 3, putative	GAPM3	0.94	0.00195881	2.70801
PBANKA_1214700	conserved Plasmodium protein, unknown function	N/A	0.9	0.0261836	1.58197
PBANKA_0523900	glideosome associated protein with multiple membrane spans 2, putative	GAPM2	0.89	0.150696	0.821898
PBANKA_0207500	cyclin-dependent kinases regulatory subunit, putative	N/A	0.87	0.440853	0.355706
PBANKA_0938500	succinate--CoA ligase [ADP-forming] subunit alpha, putative	N/A	0.8	0.0207303	1.68339
PBANKA_1319500	LCCL domain-containing protein	CCP2	0.77	0.000879879	3.05558
PBANKA_0621600	conserved Plasmodium protein, unknown function	N/A	0.75	0.390042	0.408889
PBANKA_0712900	high mobility group protein B2	HMGB2	0.74	0.116872	0.93229
PBANKA_0405300	40S ribosomal protein S23, putative	N/A	0.74	0.150321	0.822979
PBANKA_0407700	60S acidic ribosomal protein P2, putative	N/A	0.71	0.0257932	1.5885
PBANKA_0620800	conserved protein, unknown function	N/A	0.69	0.359285	0.444561
PBANKA_0403000	60S ribosomal protein L44, putative	RPL44	0.68	0.0698684	1.15572
PBANKA_1013200	succinate--CoA ligase [ADP-forming] subunit beta, putative	N/A	0.68	0.0932386	1.0304
PBANKA_1341900	ubiquitin-activating enzyme, putative	N/A	0.68	0.870757	0.0601032
PBANKA_0511400	peroxiredoxin, putative	nPrx	0.67	0.284849	0.545385
PBANKA_0943600	60S acidic ribosomal protein P1, putative	N/A	0.67	0.321944	0.492219
PBANKA_1456800	vacuolar-sorting protein SNF7, putative	SNF7	0.67	0.339338	0.469368
PBANKA_1358900	dynactin subunit 2, putative	N/A	0.67	0.738216	0.131816
PBANKA_0204500	LCCL domain-containing protein, putative	CCp5	0.65	0.131022	0.882656
PBANKA_0808200	proteasome subunit alpha type-3, putative	N/A	0.65	0.167658	0.775576
PBANKA_0819000	glideosome-associated protein 50, putative	GAP50	0.64	0.0256037	1.5917
PBANKA_1244000	cell cycle regulator protein, putative	N/A	0.64	0.0782413	1.10656
PBANKA_0509300	glutamine--fructose-6-phosphate aminotransferase [isomerizing], putative	N/A	0.64	0.119328	0.923258
PBANKA_1105300	conserved Plasmodium protein, unknown function	N/A	0.64	0.361316	0.442113
PBANKA_0807600	40S ribosomal protein S11, putative	RPS11	0.63	0.082022	1.08607
PBANKA_1035200	LCCL domain-containing protein	CCp3	0.63	0.146773	0.833355
PBANKA_1305700	vacuolar protein sorting-associated protein 60, putative	VPS60	0.63	0.236691	0.625819
PBANKA_1018400	protein arginine N-methyltransferase 1, putative	PRMT1	0.62	0.184655	0.733639
PBANKA_1144800	conserved protein, unknown function	N/A	0.61	0.153179	0.8148
PBANKA_0803400	40S ribosomal protein S29, putative	N/A	0.61	0.477943	0.320624
PBANKA_0923600	GrpE protein homolog, mitochondrial, putative	MGE1	0.6	0.0896354	1.04752
PBANKA_0909500	AAA family ATPase, putative	N/A	0.6	0.167432	0.77616
PBANKA_1306000	replication factor A protein 3, putative	RPA3	0.6	0.183278	0.73689
PBANKA_1329500	protein phosphatase containing kelch-like domains	PPKL	0.6	0.310126	0.508462
PBANKA_1300700	LCCL domain-containing protein	CCp1	0.59	0.11084	0.955305
PBANKA_1218900	elongation factor 1-delta, putative	EF-1delta	0.58	0.00581078	2.23577
PBANKA_1110500	translationally-controlled tumor protein homolog	TCTP	0.58	0.00902377	2.04461
PBANKA_1431050	10 kDa chaperonin, putative	CPN10	0.58	0.0471935	1.32612
PBANKA_0928200	conserved protein, unknown function	N/A	0.58	0.862597	0.0641919
PBANKA_1226800	DNA repair and recombination protein RAD54, putative	RAD54	0.57	0.0238848	1.62188
PBANKA_0210100	vacuolar protein sorting-associated protein VTA1, putative	N/A	0.56	0.0168479	1.77345
PBANKA_0314500	40S ribosomal protein S26, putative	RPS26	0.56	0.151676	0.819084
PBANKA_0405500	60S ribosomal protein L7, putative	N/A	0.56	0.210781	0.676169
PBANKA_0521500	conserved Plasmodium protein, unknown function	N/A	0.56	0.213935	0.669719
PBANKA_0919900	ATP-dependent 6-phosphofructokinase, putative	PFK11	0.56	0.214124	0.669334
PBANKA_0902300	female development protein FD2	FD2	0.56	0.232369	0.633823
PBANKA_0315600	40S ribosomal protein S30, putative	N/A	0.56	0.858215	0.0664038
PBANKA_0301300	conserved protein, unknown function	N/A	0.55	0.0242722	1.61489
PBANKA_0206500	ras-related protein Rab-5C, putative	RAB5c	0.55	0.242876	0.614616
PBANKA_1450700	clustered-asparagine-rich protein, putative	CARP	0.54	0.0475783	1.32259
PBANKA_1113000	purine nucleoside phosphorylase, putative	PNP	0.54	0.0820791	1.08577
PBANKA_0931100	conserved protein, unknown function	N/A	0.54	0.133432	0.874741
PBANKA_0934200	ubiquitin domain-containing protein DSK2, putative	DSK2	0.53	0.0050882	2.29344
PBANKA_0209200	parasite-infected erythrocyte surface protein	PIESP15	0.53	0.0371575	1.42995
PBANKA_1228600	conserved protein, unknown function	N/A	0.53	0.0672135	1.17254
PBANKA_1407600	60S ribosomal protein L24, putative	N/A	0.53	0.186269	0.729859
PBANKA_1217700	ATP-dependent RNA helicase DDX6	DOZI	0.53	0.270319	0.568124
PBANKA_1359700	6-cysteine protein P47	P47	0.52	0.13079	0.883425
PBANKA_1112300	ras-related protein Rab-1B, putative	RAB1b	0.52	0.321975	0.492178
PBANKA_0307000	60S ribosomal protein L37ae, putative	N/A	0.51	0.0391243	1.40755
PBANKA_1434900	raf kinase inhibitor, putative	RKIP	0.51	0.150998	0.821029
PBANKA_0609900	heat shock protein DNAJ homologue Pfj4, putative	N/A	0.51	0.756095	0.121423
PBANKA_1463200	vacuolar protein sorting-associated protein 26, putative	VPS26	0.5	0.231054	0.636287
PBANKA_1426900	ATP-dependent RNA helicase DBP1, putative	DBP1	0.5	0.374001	0.427127
PBANKA_1210200	PRE-binding protein, putative	PREBP	0.5	0.999886	4.93e-05
PBANKA_1039400	ribosomal protein S27a, putative	N/A	0.49	0.0318816	1.49646
PBANKA_0906400	60S ribosomal protein L35ae, putative	N/A	0.49	0.126333	0.898483
PBANKA_1022300	mannose-1-phosphate guanyltransferase, putative	N/A	0.49	0.251439	0.599568
PBANKA_1019400	60S ribosomal protein L7-3, putative	N/A	0.49	0.25161	0.599273
PBANKA_1124900	oxidoreductase, putative	N/A	0.48	0.0912216	1.0399
PBANKA_0507100	cytochrome c oxidase subunit ApiCOX13, putative	N/A	0.48	0.21502	0.667521
PBANKA_0505800	deoxyribose-phosphate aldolase, putative	DPA	0.48	0.219762	0.658047
PBANKA_1210900	phosphoglucomutase, putative	N/A	0.48	0.312457	0.50521
PBANKA_1115200	gamete egress protein GEP	GEP	0.47	0.368581	0.433467
PBANKA_1413900	zinc finger (CCCH type) protein, putative	N/A	0.47	0.383263	0.416503
PBANKA_1325000	40S ribosomal protein S28e, putative	N/A	0.47	0.991016	0.00391941
PBANKA_0926600	protein GCN20, putative	GCN20	0.46	0.0820992	1.08566
PBANKA_1039700	cytochrome c oxidase subunit ApiCOX19, putative	N/A	0.46	0.1328	0.876803
PBANKA_0208000	cyclase-associated protein	C-CAP	0.46	0.16348	0.786535
PBANKA_0523100	eukaryotic initiation factor 4A-III, putative	EIF4A3	0.46	0.330511	0.480814
PBANKA_0828000	gametocyte development protein GD1	GD1	0.46	0.470433	0.327502
PBANKA_0914400	heat shock protein 70, putative	UIS24	0.46	0.999993	2.98e-06
PBANKA_0407300	OMD protein	OMD	0.45	0.137586	0.861426
PBANKA_0933900	glyoxalase I, putative	GLO1	0.45	0.138779	0.857675
PBANKA_1324400	60S ribosomal protein L27, putative	RPL27	0.45	0.2141	0.669383
PBANKA_0620200	respiratory chain complex 3 associated protein 1, putative	N/A	0.45	0.246747	0.607748
PBANKA_1439200	polyadenylate-binding protein 1, putative	PABP1	0.45	0.594296	0.225998
PBANKA_1364300	glycerol kinase, putative	N/A	0.44	0.254816	0.593773
PBANKA_0404700	glutaredoxin 1, putative	GRX1	0.44	0.310849	0.507451
PBANKA_1117500	ribosomal protein L27a, putative	N/A	0.44	0.339104	0.469668
PBANKA_1139900	reticulon-like protein, putative	RTN1	0.44	0.370049	0.431741
PBANKA_0924400	13 kDa ribonucleoprotein-associated protein, putative	SNU13	0.44	0.500264	0.3008
PBANKA_0904500	SUMO-activating enzyme subunit 1, putative	AOS1	0.43	0.0155096	1.8094
PBANKA_0501700	phosphomannomutase, putative	HAD5	0.43	0.0854659	1.06821
PBANKA_1359000	protein transport protein SEC61 subunit alpha, putative	SEC61A	0.43	0.1583	0.800519
PBANKA_0313600	conserved Plasmodium protein, unknown function	N/A	0.43	0.344004	0.463436
PBANKA_1448900	DNA polymerase epsilon subunit B, putative	N/A	0.43	0.682327	0.166007
PBANKA_0924900	eukaryotic peptide chain release factor GTP-binding subunit, putative	ERF3	0.42	0.356593	0.447827
PBANKA_1233500	mRNA-binding protein PUF1	PUF1	0.42	0.365205	0.437464
PBANKA_0711300	conserved protein, unknown function	N/A	0.42	0.367744	0.434455
PBANKA_1301300	trailer hitch homolog	CITH	0.42	0.446113	0.350555
PBANKA_1328400	cytochrome c oxidase subunit 6A, putative	COX6A	0.41	0.171392	0.76601
PBANKA_1138300	transmembrane and coiled-coil domain-containing protein 1, putative	TMCO1	0.41	0.17914	0.746807
PBANKA_1026300	conserved protein, unknown function	N/A	0.41	0.180852	0.742678
PBANKA_1222900	26S proteasome regulatory subunit RPN10, putative	RPN10	0.41	0.215939	0.665669
PBANKA_1354500	60S ribosomal protein L18-2, putative	N/A	0.41	0.34178	0.466254
PBANKA_1010800	CCR4-associated factor 16, putative	CAF16	0.41	0.540791	0.266971
PBANKA_1204400	DNA/RNA-binding protein Alba 3, putative	ALBA3	0.41	0.602906	0.21975
PBANKA_0715200	eukaryotic translation initiation factor 3 subunit G, putative	EIF3G	0.41	0.898926	0.0462762
PBANKA_1141700	ubiquitin-60S ribosomal protein L40, putative	N/A	0.4	0.00354693	2.45015
PBANKA_0214000	dynein heavy chain, putative	DHC3	0.4	0.0789941	1.10241
PBANKA_0404800	FAD-dependent glycerol-3-phosphate dehydrogenase, putative	N/A	0.4	0.205987	0.68616
PBANKA_0831800	elongation factor Tu, putative	N/A	0.4	0.381933	0.418013
PBANKA_1358600	isocitrate dehydrogenase [NADP], mitochondrial, putative	IDH	0.4	0.433088	0.363424
PBANKA_1221200	60S ribosomal protein L34, putative	RPL34	0.4	0.886143	0.0524963
PBANKA_0110200	lsm12, putative	N/A	0.39	0.00363033	2.44005
PBANKA_1210700	cytochrome b-c1 complex subunit 7, putative	QCR7	0.39	0.0762808	1.11758
PBANKA_1355200	aconitate hydratase, putative	IRP	0.39	0.170227	0.768971
PBANKA_0917900	26S protease regulatory subunit 6A, putative	RPT5	0.39	0.308524	0.510711
PBANKA_0707400	RNA-binding protein, putative	N/A	0.39	0.397791	0.400345
PBANKA_0943200	casein kinase II beta chain, putative	N/A	0.38	0.00259423	2.58599
PBANKA_1358200	cytochrome c oxidase subunit ApiCOX16, putative	N/A	0.38	0.0216295	1.66495
PBANKA_1445100	ATP-dependent protease subunit ClpQ, putative	ClpQ	0.38	0.0340132	1.46835
PBANKA_0804000	60S ribosomal protein L37, putative	RPL37	0.38	0.0486831	1.31262
PBANKA_1219200	cytochrome c oxidase subunit 4, putative	COX4	0.38	0.139779	0.854557
PBANKA_0514500	26S proteasome regulatory subunit RPN9, putative	RPN9	0.38	0.318911	0.49633
PBANKA_0520200	ADP,ATP carrier protein 1, putative	AAC1	0.38	0.322231	0.491833
PBANKA_1362000	glutamate--tRNA ligase, putative	GluRS	0.38	0.340979	0.467273
PBANKA_0911400	CLPTM1 domain-containing protein, putative	N/A	0.38	0.362494	0.440699
PBANKA_0714800	ribosome assembly protein RRB1, putative	RRB1	0.38	0.383761	0.415939
PBANKA_0503600	60S ribosomal protein L30e, putative	N/A	0.38	0.863958	0.0635075
PBANKA_1441900	DNA helicase 60, putative	DH60	0.38	0.999838	7.02e-05
PBANKA_1209800	proteasome subunit beta type-5, putative	N/A	0.37	0.0310594	1.50781
PBANKA_1018100	ABC transporter G family member 2	ABCG2	0.37	0.078231	1.10662
PBANKA_1237900	mitochondrial-processing peptidase subunit alpha, putative	QCR2	0.37	0.0957295	1.01895
PBANKA_1451500	conserved Plasmodium protein, unknown function	N/A	0.37	0.257408	0.589378
PBANKA_0715500	phosphoglucomutase-2	PGM2	0.37	0.294837	0.530418
PBANKA_1452300	conserved protein, unknown function	N/A	0.37	0.302236	0.519653
PBANKA_0938300	heat shock protein HspJ62	HSPJ62	0.37	0.325965	0.486829
PBANKA_0826300	thioredoxin-like protein 2, putative	TLP2	0.37	0.373296	0.427946
PBANKA_1413200	pinin/SDK/MemA domain-containing protein, putative	N/A	0.37	0.413277	0.383758
PBANKA_1023900	glutathione S-transferase, putative	GST	0.37	0.623779	0.204969
PBANKA_0407400	aurora-related kinase ARK2	ARK2	0.37	0.749055	0.125486
PBANKA_1003300	TMEM33 domain-containing protein	TMEM33	0.37	1	1.9e-07
PBANKA_0715700	lysine decarboxylase-like protein, putative	N/A	0.36	0.0411933	1.38517
PBANKA_1452900	dynactin subunit 3, putative	N/A	0.36	0.0525558	1.27938
PBANKA_1315500	sortilin, putative	SORTLR	0.36	0.152352	0.817152
PBANKA_0617900	apoptosis-inducing factor, putative	AIF	0.36	0.218172	0.661202
PBANKA_1236300	ATP-dependent RNA helicase DDX1, putative	DDX1	0.36	0.226141	0.64562
PBANKA_0806100	CCR4 domain-containing protein 4, putative	CCR4-4	0.36	0.278708	0.55485
PBANKA_1463900	HSP20-like chaperone, putative	N/A	0.36	0.317743	0.497924
PBANKA_1302800	thioredoxin peroxidase 1	TPx1	0.36	0.498107	0.302677
PBANKA_0905000	40S ribosomal protein S21, putative	RPS21	0.36	0.815063	0.0888087
PBANKA_1007000	chaperone protein DnaJ, putative	N/A	0.36	0.994047	0.00259307
PBANKA_0918100	60S ribosomal protein L38, putative	RPL38	0.35	0.119844	0.921384
PBANKA_1417300	translocation protein SEC63, putative	SEC63	0.35	0.126098	0.899292
PBANKA_0408400	phosphoglycerate mutase, putative	N/A	0.35	0.233546	0.631628
PBANKA_1419100	dihydrolipoyllysine-residue succinyltransferase component of 2-oxoglutarate dehydrogenase complex, putative	N/A	0.35	0.372056	0.429391
PBANKA_0932200	peptidyl-prolyl cis-trans isomerase, putative	N/A	0.35	0.419426	0.377345
PBANKA_0717800	60S ribosomal protein L15, putative	N/A	0.35	0.439954	0.356593
PBANKA_1333300	conserved Plasmodium protein, unknown function	N/A	0.35	0.468054	0.329704
PBANKA_1462700	THO complex subunit 2, putative	THO2	0.35	0.470383	0.327548
PBANKA_0605600	conserved Plasmodium protein, unknown function	N/A	0.35	0.584444	0.233257
PBANKA_1140600	DNA-directed RNA polymerases I, II, and III subunit RPABC1, putative	RPB5	0.35	0.80105	0.0963403
PBANKA_0923400	60S ribosomal protein L35, putative	RPL35	0.35	0.90695	0.0424165
PBANKA_1215500	translation machinery-associated protein 7, putative	TMA7	0.35	0.991886	0.00353839
PBANKA_0616700	NIMA related kinase 4	NEK4	0.34	0.135963	0.866579
PBANKA_1341100	respiratory chain complex 3 associated protein 2, putative	N/A	0.34	0.173064	0.761793
PBANKA_0506700	citrate synthase, mitochondrial, putative	CS	0.34	0.28017	0.552579
PBANKA_0906500	60S ribosomal protein L28, putative	N/A	0.34	0.329074	0.482707
PBANKA_1302200	translocation protein SEC62, putative	N/A	0.34	0.348718	0.457525
PBANKA_1113500	ras-related protein Rab-1A, putative	RAB1a	0.34	0.368187	0.433932
PBANKA_0806400	PAT complex subunit CCDC47, putative	N/A	0.34	0.386509	0.41284
PBANKA_1434400	secreted ookinete protein, putative	PSOP17	0.34	0.430368	0.36616
PBANKA_0941500	40S ribosomal protein S4, putative	RPS4	0.34	0.462111	0.335253
PBANKA_0410600	60S ribosomal protein L26, putative	N/A	0.34	0.596936	0.224072
PBANKA_0810200	conserved Plasmodium protein, unknown function	N/A	0.34	0.621959	0.206238
PBANKA_1421300	phosphoglycolate phosphatase	PGP	0.34	0.662253	0.178976
PBANKA_0937700	60S ribosomal protein L36, putative	RPL36	0.34	0.873865	0.0585557
PBANKA_1338600	60S ribosomal protein L23, putative	RPL23	0.34	0.993427	0.00286389
PBANKA_0506600	serine/arginine-rich splicing factor 4, putative	SRSF4	0.33	0.00998856	2.0005
PBANKA_1345000	PITH domain-containing protein, putative	N/A	0.33	0.0683065	1.16554
PBANKA_1202100	MKT1 domain-containing protein, putative	N/A	0.33	0.135503	0.868052
PBANKA_0601100	mitochondrial phosphate carrier protein, putative	PIC	0.33	0.277944	0.556042
PBANKA_1360300	DNA/RNA-binding protein Alba 4, putative	ALBA4	0.33	0.283276	0.547791
PBANKA_1435200	female development protein FD4	FD4	0.33	0.361903	0.441408
PBANKA_0415000	Maf-like protein, putative	N/A	0.33	0.698479	0.155847
PBANKA_0414100	inorganic pyrophosphatase, putative	PPase	0.33	0.763438	0.117226
PBANKA_0617100	60S ribosomal protein L11a, putative	N/A	0.33	0.833203	0.0792489
PBANKA_1200800	transformer-2 protein homolog beta, putative	TRA2B	0.33	0.960909	0.0173177
PBANKA_1301400	proteasome subunit alpha type-1, putative	N/A	0.32	0.0477054	1.32143
PBANKA_0813400	alkaline phosphatase, putative	N/A	0.32	0.0678366	1.16854
PBANKA_1303500	cytochrome c oxidase subunit NDUFA4, putative	NDUFA4	0.32	0.172949	0.762081
PBANKA_1453300	acyl-CoA synthetase, putative	ACS11	0.32	0.370681	0.431
PBANKA_0209300	actin-related protein ARP1	ARP1	0.32	0.407552	0.389817
PBANKA_1038800	EGF domain-containing protein, putative	N/A	0.32	0.709053	0.149322
PBANKA_1202400	60S ribosomal protein L13, putative	N/A	0.32	0.946984	0.0236573
PBANKA_0506100	PHAX domain-containing protein, putative	N/A	0.32	0.970502	0.0130035
PBANKA_1142800	conserved protein, unknown function	N/A	0.32	0.989266	0.00468711
PBANKA_1033200	DNA damage-inducible protein 1, putative	DDI1	0.32	0.999236	0.000331881
PBANKA_1321000	MA3 domain-containing protein, putative	N/A	0.31	0.109225	0.961678
PBANKA_1009500	glutamate synthase [NADH], putative	N/A	0.31	0.177729	0.750242
PBANKA_0522400	steroid dehydrogenase, putative	N/A	0.31	0.211967	0.673731
PBANKA_1303300	cytochrome b-c1 complex subunit Rieske, putative	N/A	0.31	0.217359	0.662822
PBANKA_0712600	14-3-3 protein	14-3-3I	0.31	0.262496	0.580878
PBANKA_1425400	proteasome activator complex subunit 4, putative	N/A	0.31	0.279131	0.554192
PBANKA_0520600	enhancer of rudimentary homolog, putative	ERH	0.31	0.402165	0.395595
PBANKA_1235600	adenosylhomocysteinase, putative	SAHH	0.31	0.579308	0.237091
PBANKA_1364200	60S ribosomal protein L17, putative	N/A	0.31	0.667604	0.175481
PBANKA_1104800	actin-like protein, putative	ALP2b	0.31	0.918215	0.0370557
PBANKA_0833100	M18 aspartyl aminopeptidase, putative	M18AAP	0.3	0.134858	0.870123
PBANKA_1035500	vacuolar protein sorting-associated protein 29, putative	VPS29	0.3	0.169596	0.770583
PBANKA_0929100	acyl-CoA-binding protein, putative	N/A	0.3	0.18862	0.724412
PBANKA_1120100	tetratricopeptide repeat protein, putative	N/A	0.3	0.245945	0.609162
PBANKA_0601600	nuclear export mediator factor NEMF, putative	NEMF	0.3	0.246873	0.607527
PBANKA_1028400	60S ribosomal protein L10, putative	N/A	0.3	0.287209	0.541802
PBANKA_1407000	conserved Plasmodium protein, unknown function	N/A	0.3	0.290233	0.537254
PBANKA_1423600	40S ribosomal protein S16, putative	N/A	0.3	0.305606	0.514839
PBANKA_0912300	tudor staphylococcal nuclease, putative	TSN	0.3	0.40372	0.39392
PBANKA_1306200	tRNA import protein tRIP	tRIP	0.3	0.404054	0.393561
PBANKA_1401300	40S ribosomal protein S7, putative	N/A	0.3	0.408066	0.38927
PBANKA_0401400	RNA-binding protein, putative	N/A	0.3	0.439389	0.35715
PBANKA_0505600	endomembrane protein 70, putative	N/A	0.3	0.452456	0.344423
PBANKA_0414900	dynein intermediate light chain, putative	N/A	0.3	0.502215	0.29911
PBANKA_0511900	60S ribosomal protein L3, putative	RPL3	0.3	0.536256	0.270628
PBANKA_1443900	PhIL1-interacting candidate PIC1, putative	N/A	0.3	0.550492	0.259249
PBANKA_1229200	60S ribosomal protein L19, putative	N/A	0.3	0.599187	0.222438
PBANKA_1018600	60S ribosomal protein L21, putative	RPL21	0.3	0.643123	0.191706
PBANKA_1001100	ubiquitin-specific protease, putative	N/A	0.3	0.739704	0.130942
PBANKA_1201900	40S ribosomal protein S20e, putative	N/A	0.3	0.9982	0.000782514
PBANKA_1116500	mitochondrial import receptor subunit TOM40, putative	TOM40	0.29	0.0953492	1.02068
PBANKA_0922800	small nuclear ribonucleoprotein Sm D1, putative	SNRPD1	0.29	0.107997	0.966588
PBANKA_1315300	LCCL domain-containing protein	LAP5	0.29	0.159808	0.796402
PBANKA_0418300	protein RER1, putative	RER1	0.29	0.248857	0.60405
PBANKA_1132400	conserved Plasmodium protein, unknown function	N/A	0.29	0.289209	0.538788
PBANKA_0918300	major facilitator superfamily-related transporter, putative	MFR5	0.29	0.462078	0.335284
PBANKA_0402300	lipoamide acyltransferase component of branched-chain alpha-keto acid dehydrogenase complex, putative	BCKDH-E2	0.29	0.48529	0.313999
PBANKA_0404600	activator of Hsp90 ATPase, putative	AHA1	0.29	0.559484	0.252212
PBANKA_0406000	apicomplexan kinetochore protein 10	AKIT10	0.29	0.588544	0.230221
PBANKA_1008200	cGMP-dependent protein kinase	PKG	0.29	0.611984	0.21326
PBANKA_1027900	small nuclear ribonucleoprotein-associated protein B, putative	SMB1	0.29	0.660596	0.180064
PBANKA_1307000	apicomplexan kinetochore protein 9	AKIT9	0.29	0.67102	0.173265
PBANKA_1032700	CUGBP Elav-like family member 2, putative	CELF2	0.29	0.830385	0.0807205
PBANKA_0818900	endoplasmic reticulum chaperone BiP, putative	BIP	0.29	0.843144	0.0740983
PBANKA_1235300	bis(5'-nucleosyl)-tetraphosphatase [asymmetrical], putative	N/A	0.29	0.894326	0.0485042
PBANKA_1409800	ATP synthase subunit gamma, mitochondrial, putative	N/A	0.28	0.0526829	1.27833
PBANKA_1228200	glutamate dehydrogenase, putative	GDH3	0.28	0.119358	0.923147
PBANKA_1028700	26S proteasome regulatory subunit RPN13, putative	RPN13	0.28	0.14759	0.830943
PBANKA_0710100	2-oxoglutarate dehydrogenase E1 component, putative	KDH	0.28	0.170455	0.768391
PBANKA_1429700	W2 domain-containing protein, putative	N/A	0.28	0.378203	0.422275
PBANKA_1107300	nuclear protein localization protein 4, putative	NPL4	0.28	0.557336	0.253883
PBANKA_1345600	elongation factor Tu, putative	N/A	0.28	0.60485	0.218352
PBANKA_0827500	glutamine-dependent NAD(+) synthetase, putative	NADSYN	0.28	0.644812	0.190567
PBANKA_1219500	chloroquine resistance transporter, putative	CRT	0.28	0.673825	0.171453
PBANKA_1134700	conserved Plasmodium protein, unknown function	N/A	0.28	0.688295	0.162225
PBANKA_1003400	amino acid decarboxylase AAD, putative	AAD	0.28	0.757425	0.12066
PBANKA_0507400	orotidine 5'-phosphate decarboxylase, putative	OMPDC	0.28	0.820745	0.0857918
PBANKA_1416300	40S ribosomal protein S19, putative	RPS19	0.28	0.993287	0.00292513
PBANKA_0943300	actin-like protein, putative	ALP2a	0.28	0.999351	0.000282072
PBANKA_1338300	60S ribosomal protein L6, putative	N/A	0.28	0.999709	0.000126313
PBANKA_0315200	small nuclear ribonucleoprotein Sm D2, putative	SNRPD2	0.27	0.0129411	1.88803
PBANKA_0518700	methionine--tRNA ligase, putative	N/A	0.27	0.114447	0.941397
PBANKA_1331900	eukaryotic initiation factor 4a, putative	eIF4A	0.27	0.131844	0.879939
PBANKA_1012800	voltage-dependent anion-selective channel protein, putative	N/A	0.27	0.1555	0.808269
PBANKA_0833000	profilin	PFN	0.27	0.161465	0.791922
PBANKA_1428800	succinate dehydrogenase [ubiquinone] iron-sulfur subunit, mitochondrial, putative	SDHB	0.27	0.221252	0.655113
PBANKA_1241900	ubiquitin-conjugating enzyme E2 13, putative	UBC13	0.27	0.228387	0.641328
PBANKA_1447000	cytochrome b5, putative	N/A	0.27	0.243586	0.613348
PBANKA_1359300	VPS13 domain-containing protein, putative	N/A	0.27	0.275736	0.559507
PBANKA_1409900	AP-1 complex subunit mu-1, putative	AP1M1	0.27	0.387343	0.411904
PBANKA_1347600	eukaryotic translation initiation factor 6, putative	N/A	0.27	0.409039	0.388235
PBANKA_1105400	small ubiquitin-related modifier, putative	SUMO	0.27	0.481899	0.317044
PBANKA_0402100	spindle pole body protein, putative	N/A	0.27	0.515053	0.288148
PBANKA_1445400	protein transport protein SEC13	SEC13	0.27	0.594472	0.225868
PBANKA_1457800	ADP-ribosylation factor GTPase-activating protein 1, putative	ARFGAP1	0.27	0.601437	0.22081
PBANKA_1351300	conserved Plasmodium protein, unknown function	N/A	0.27	0.613355	0.212288
PBANKA_1458800	kinesin-15	N/A	0.27	0.808888	0.0921116
PBANKA_1336900	conserved Plasmodium protein, unknown function	N/A	0.27	0.908504	0.0416733
PBANKA_0107100	proteasome subunit alpha type-2, putative	N/A	0.27	0.931054	0.0310249
PBANKA_1135700	CUGBP Elav-like family member 1, putative	CELF1	0.27	0.949487	0.0225108
PBANKA_0103300	GYF domain-containing protein, putative	N/A	0.27	0.998218	0.000774633
PBANKA_0916400	ubiquitin-like protein, putative	N/A	0.27	0.998501	0.000651515
PBANKA_0823500	glutamine synthetase	N/A	0.26	0.123131	0.909631
PBANKA_0917500	structural maintenance of chromosomes protein 1, putative	SMC1	0.26	0.319099	0.496075
PBANKA_1029800	glycylpeptide N-tetradecanoyltransferase, putative	NMT	0.26	0.398413	0.399666
PBANKA_0607800	cytosolic iron-sulfur protein assembly protein 1, putative	CIA1	0.26	0.46362	0.333837
PBANKA_0936100	acylphosphatase, putative	N/A	0.26	0.558643	0.252866
PBANKA_0823000	ubiquitin-like protein, putative	N/A	0.26	0.982121	0.00783487
PBANKA_1231700	60S ribosomal protein L2, putative	RPL2	0.26	0.999864	5.92e-05
PBANKA_1019700	NTF2-like domain-containing protein	N/A	0.26	0.999961	1.7e-05
PBANKA_1242700	AP-1/2 complex subunit beta, putative	N/A	0.25	0.0355703	1.44891
PBANKA_1437300	endoplasmin, putative	GRP94	0.25	0.0801849	1.09591
PBANKA_0719400	LETM1-like protein, putative	N/A	0.25	0.182214	0.739418
PBANKA_0919300	spermidine synthase, putative	SPDS	0.25	0.218194	0.661157
PBANKA_0109200	transcription elongation factor SPT5, putative	SPT5	0.25	0.357544	0.44667
PBANKA_1031900	eukaryotic translation initiation factor 2 subunit gamma, putative	eIF2gamma	0.25	0.371484	0.43006
PBANKA_1127800	DnaJ protein, putative	N/A	0.25	0.454221	0.342732
PBANKA_1320900	thioredoxin 1, putative	TRX1	0.25	0.528728	0.276768
PBANKA_0939700	vacuolar fusion protein CCZ1, putative	N/A	0.25	0.610857	0.214061
PBANKA_0820000	DnaJ protein, putative	N/A	0.25	0.698791	0.155652
PBANKA_1033800	conserved protein, unknown function	N/A	0.25	0.756363	0.121269
PBANKA_0415200	vacuolar protein sorting-associated protein 46, putative	VPS46	0.25	0.801708	0.0959838
PBANKA_0813500	SAP domain-containing protein, putative	N/A	0.25	0.815371	0.0886445
PBANKA_1037300	conserved Plasmodium protein, unknown function	N/A	0.25	0.866348	0.0623074
PBANKA_0405600	end-binding protein 1	EB1	0.25	0.993398	0.00287681
PBANKA_1215600	40S ribosomal protein S3A, putative	RPS3A	0.25	0.999796	8.87e-05
PBANKA_0828100	fumarate hydratase, putative	FH	0.24	0.119278	0.923441
PBANKA_1459300	actin I	ACT1	0.24	0.165953	0.780016
PBANKA_1450300	ATP synthase subunit beta, mitochondrial	ATPbeta	0.24	0.254181	0.594857
PBANKA_0518200	flavoprotein subunit of succinate dehydrogenase, putative	SDHA	0.24	0.256449	0.590999
PBANKA_0212100	eukaryotic translation initiation factor 2 subunit alpha	eIF2alpha	0.24	0.278245	0.555572
PBANKA_1352000	elongation factor 1-gamma, putative	EF-1gamma	0.24	0.341301	0.466863
PBANKA_1351900	60S ribosomal protein L6, putative	RPL6	0.24	0.360585	0.442992
PBANKA_0801200	erythrocyte membrane-associated antigen, putative	N/A	0.24	0.414553	0.38242
PBANKA_1430800	thioredoxin peroxidase 2, putative	Trx-Px2	0.24	0.453924	0.343016
PBANKA_1239900	acyl-CoA synthetase, putative	ACS10	0.24	0.463096	0.334329
PBANKA_0923200	ATP synthase F0 subunit b-like protein, putative	ICAP2	0.24	0.54495	0.263644
PBANKA_1130800	phosphoinositide phosphatase SAC1, putative	SAC1	0.24	0.57462	0.24062
PBANKA_1217000	peptidase, putative	N/A	0.24	0.577965	0.238098
PBANKA_0704100	ubiquitin conjugation factor E4 B, putative	UBE4B	0.24	0.683118	0.165504
PBANKA_0924300	endoplasmic reticulum oxidoreductin, putative	ERO1	0.24	0.70569	0.151386
PBANKA_0410400	glycogen synthase kinase-3 beta, putative	GSK3beta	0.24	0.70959	0.148992
PBANKA_1311700	multidrug resistance protein 2, putative	MDR2	0.24	0.742856	0.129095
PBANKA_0805900	kinesin-8X	N/A	0.24	0.921949	0.0352932
PBANKA_0801900	RNA cytosine C(5)-methyltransferase, putative	NSUN1	0.24	0.930142	0.0314505
PBANKA_1231800	60S ribosomal protein L12, putative	N/A	0.24	0.932044	0.0305635
PBANKA_1461800	26S protease regulatory subunit 8, putative	RPT6	0.24	0.947282	0.0235205
PBANKA_1135100	40S ribosomal protein S15, putative	RPS15	0.24	0.968347	0.0139689
PBANKA_1343900	PUB domain-containing protein, putative	N/A	0.24	0.998926	0.000466713
PBANKA_0404200	ubiquitin-conjugating enzyme MMS2, putative	N/A	0.23	0.0623983	1.20483
PBANKA_1357200	endoplasmic reticulum chaperone GRP170, putative	GRP170	0.23	0.097296	1.0119
PBANKA_1222100	regulator of chromosome condensation, putative	N/A	0.23	0.121747	0.914541
PBANKA_1103100	actin-depolymerizing factor 1	ADF1	0.23	0.196599	0.706418
PBANKA_0615600	thioredoxin-like protein	N/A	0.23	0.248366	0.604908
PBANKA_0934300	UDP-galactose transporter, putative	UGT	0.23	0.332857	0.477742
PBANKA_1351800	26S proteasome regulatory subunit RPN3, putative	RPN3	0.23	0.38632	0.413053
PBANKA_0520900	antigen UB05, putative	N/A	0.23	0.428028	0.368528
PBANKA_1209000	eukaryotic translation initiation factor 2 subunit beta, putative	eIF2beta	0.23	0.428345	0.368207
PBANKA_0303600	26S proteasome regulatory subunit RPN1, putative	RPN1	0.23	0.470745	0.327215
PBANKA_0604800	eukaryotic translation initiation factor 3 subunit C, putative	EIF3C	0.23	0.565401	0.247643
PBANKA_0103900	KH domain-containing protein, putative	N/A	0.23	0.667443	0.175586
PBANKA_1321700	berghepain-1	BP1	0.23	0.724109	0.140196
PBANKA_0409800	ATP synthase F0 subunit d-like protein, putative	N/A	0.23	0.830146	0.0808457
PBANKA_0510900	40S ribosomal protein S2, putative	RPS2	0.23	0.861889	0.0645485
PBANKA_1120700	nascent polypeptide-associated complex subunit alpha, putative	N/A	0.23	0.87757	0.056718
PBANKA_0105300	WD repeat-containing protein, putative	N/A	0.23	0.949442	0.0225317
PBANKA_1431400	conserved Plasmodium protein, unknown function	N/A	0.23	0.973861	0.011503
PBANKA_1354400	60S ribosomal protein L18, putative	N/A	0.23	0.991887	0.00353761
PBANKA_1231000	40S ribosomal protein S11, putative	RPS11	0.23	0.994021	0.00260456
PBANKA_0605300	eukaryotic translation initiation factor 5, putative	EIF5	0.23	0.999578	0.000183158
PBANKA_0828600	cytochrome c oxidase subunit 5B, putative	COX5B	0.22	0.119933	0.921061
PBANKA_1433500	PPPDE peptidase domain-containing protein, putative	N/A	0.22	0.155561	0.808099
PBANKA_0610800	eukaryotic translation initiation factor eIF2A, putative	N/A	0.22	0.31106	0.507156
PBANKA_1456200	rab specific GDP dissociation inhibitor, putative	rabGDI	0.22	0.32143	0.492914
PBANKA_1426300	ER membrane protein complex subunit 1, putative	EMC1	0.22	0.396404	0.401862
PBANKA_0407600	asparagine synthetase [glutamine-hydrolyzing]	AS	0.22	0.451645	0.345203
PBANKA_1033100	conserved protein, unknown function	N/A	0.22	0.462536	0.334854
PBANKA_1232500	eukaryotic translation initiation factor 3 subunit B, putative	EIF3B	0.22	0.517471	0.286114
PBANKA_0105400	coatomer alpha subunit, putative	N/A	0.22	0.541761	0.266192
PBANKA_1211700	Nicalin domain-containing protein	N/A	0.22	0.616012	0.210411
PBANKA_0807500	conserved Plasmodium protein, unknown function	N/A	0.22	0.641337	0.192914
PBANKA_1406800	40S ribosomal protein S27, putative	RPS27	0.22	0.739346	0.131152
PBANKA_1321200	vacuolar protein sorting-associated protein 4, putative	VPS4	0.22	0.788524	0.103185
PBANKA_0830000	RNA-binding protein, putative	N/A	0.22	0.8136	0.0895889
PBANKA_1131500	conserved Plasmodium protein, unknown function	N/A	0.22	0.897229	0.0470968
PBANKA_0939600	polyadenylate-binding protein-interacting protein 1, putative	PAIP1	0.22	0.985118	0.00651182
PBANKA_0619100	40S ribosomal protein S5, putative	N/A	0.22	0.992763	0.00315426
PBANKA_1022000	40S ribosomal protein S25, putative	N/A	0.22	0.993691	0.00274843
PBANKA_0807000	DNA-directed RNA polymerase II subunit RPB1, putative	RPB1	0.22	0.995251	0.00206724
PBANKA_1411300	eukaryotic translation initation factor 4 gamma, putative	EIF4G	0.22	0.998854	0.000497939
PBANKA_1454800	female development protein FD1	FD1	0.22	0.999627	0.000162228
PBANKA_0108700	RNA-binding protein 25, putative	RBM25	0.22	0.999698	0.00013108
PBANKA_0937100	vacuolar protein sorting-associated protein 35, putative	VPS35	0.21	0.107838	0.96723
PBANKA_1109000	RNA polymerase I, putative	N/A	0.21	0.119842	0.921391
PBANKA_1453500	HD superfamily phosphohydrolase protein, putative	N/A	0.21	0.233598	0.63153
PBANKA_1209100	dolichyl-phosphate-mannose--protein mannosyltransferase, putative	N/A	0.21	0.265444	0.576027
PBANKA_1218400	protein transport protein SEC22, putative	SEC22	0.21	0.320453	0.494235
PBANKA_0306500	ARMT1-like domain-containing protein, putative	N/A	0.21	0.40594	0.391538
PBANKA_1242000	ubiquitin carboxyl-terminal hydrolase 14, putative	USP14	0.21	0.430378	0.36615
PBANKA_0716000	structural maintenance of chromosomes protein 3, putative	SMC3	0.21	0.454538	0.34243
PBANKA_1354100	ras-related protein Rab-11B, putative	RAB11b	0.21	0.527908	0.277441
PBANKA_0940900	RuvB-like helicase 2, putative	RUVB2	0.21	0.639764	0.19398
PBANKA_1015100	conserved Plasmodium protein, unknown function	N/A	0.21	0.658654	0.181342
PBANKA_0820300	protein disulfide-isomerase PDI-Trans	PDI-Trans	0.21	0.684322	0.164739
PBANKA_1234500	FoP domain-containing protein, putative	N/A	0.21	0.759627	0.1194
PBANKA_1025500	CCR4-NOT transcription complex subunit NOT1, putative	NOT1	0.21	0.895985	0.0476994
PBANKA_0805200	cytoskeleton associated protein, putative	N/A	0.21	0.954637	0.0201617
PBANKA_1214000	heat shock protein 60, putative	HSP60	0.21	0.987708	0.00537144
PBANKA_0908800	conserved Plasmodium protein, unknown function	N/A	0.21	0.996304	0.00160831
PBANKA_0814200	elongation factor 1-beta, putative	N/A	0.21	0.999877	5.35e-05
PBANKA_0517900	conserved protein, unknown function	N/A	0.2	0.110316	0.957363
PBANKA_0417700	alpha tubulin 1	N/A	0.2	0.176239	0.753897
PBANKA_1204800	phosducin-like protein 3	PhLP3	0.2	0.258479	0.587576
PBANKA_1007200	replication protein A1, large subunit, putative	RPA1	0.2	0.310708	0.507647
PBANKA_1320200	STAG domain-containing protein, putative	N/A	0.2	0.365194	0.437476
PBANKA_1201100	conserved Plasmodium protein, unknown function	N/A	0.2	0.430125	0.366406
PBANKA_1213600	cysteine--tRNA ligase, putative	CysRS	0.2	0.459832	0.337401
PBANKA_0605400	conserved Plasmodium protein, unknown function	N/A	0.2	0.466813	0.330857
PBANKA_0308600	asparagine--tRNA ligase, putative	N/A	0.2	0.501506	0.299724
PBANKA_1142400	nucleoside diphosphate kinase b, putative	N/A	0.2	0.550211	0.259471
PBANKA_1337400	nucleoside-diphosphatase, putative	N/A	0.2	0.557695	0.253603
PBANKA_0716600	acylated pleckstrin-homology domain-containing protein, putative	APH	0.2	0.562089	0.250195
PBANKA_1013000	inner membrane complex suture component, putative	ISC3	0.2	0.574541	0.240679
PBANKA_1125600	pyruvate kinase, putative	N/A	0.2	0.602098	0.220333
PBANKA_0920800	CRAL/TRIO domain-containing protein, putative	N/A	0.2	0.614183	0.211702
PBANKA_1320400	conserved Plasmodium protein, unknown function	N/A	0.2	0.620126	0.20752
PBANKA_0409300	phosphatidylinositol 3- and 4-kinase, putative	N/A	0.2	0.709524	0.149033
PBANKA_1019500	60S ribosomal protein L5, putative	N/A	0.2	0.74109	0.130129
PBANKA_1337500	protein STU2, putative	STU2	0.2	0.759246	0.119617
PBANKA_0401100	serine/threonine protein kinase, putative	SRPK1	0.2	0.793942	0.100211
PBANKA_0614500	eukaryotic translation initiation factor 3 subunit I, putative	EIF3I	0.2	0.834222	0.0787185
PBANKA_0804300	DNA mismatch repair protein MSH2	MSH2-2	0.2	0.851618	0.0697552
PBANKA_0213200	apicomplexan kinetochore protein 8	AKIT8	0.2	0.903061	0.0442831
PBANKA_0928800	splicing factor U2AF small subunit, putative	U2AF1	0.2	0.952041	0.0213442
PBANKA_0105500	glutaredoxin-like protein	GLP2	0.2	0.957939	0.018662
PBANKA_1202700	RNA-binding protein, putative	N/A	0.2	0.987865	0.00530241
PBANKA_0619300	conserved Plasmodium protein, unknown function	N/A	0.2	0.991708	0.00361599
PBANKA_1106700	60S ribosomal protein L4, putative	RPL4	0.2	0.998444	0.000676171
PBANKA_1410000	26S protease regulatory subunit 7, putative	RPT1	0.2	0.999376	0.000270909
PBANKA_1116300	malate:quinone oxidoreductase, putative	MQO	0.19	0.380334	0.419834
PBANKA_1428700	eukaryotic translation initiation factor 3 subunit A, putative	EIF3A	0.19	0.507884	0.294235
PBANKA_1346600	glutamine--tRNA ligase, putative	N/A	0.19	0.53037	0.275421
PBANKA_0202500	P-loop containing nucleoside triphosphate hydrolase, putative	N/A	0.19	0.707671	0.150169
PBANKA_0309100	eukaryotic peptide chain release factor subunit 1, putative	ERF1	0.19	0.760906	0.118669
PBANKA_0613500	conserved Plasmodium protein, unknown function	N/A	0.19	0.836714	0.0774228
PBANKA_0942700	chromatin remodeling protein, putative	SNF2L	0.19	0.897386	0.0470209
PBANKA_0928700	ubiquitin-protein ligase, putative	N/A	0.19	0.906555	0.042606
PBANKA_1423900	translation initiation factor SUI1, putative	N/A	0.19	0.948719	0.0228626
PBANKA_1107200	protein CAF40, putative	CAF40	0.19	0.949987	0.0222823
PBANKA_1103400	60S ribosomal protein L31, putative	RPL31	0.19	0.975237	0.0108899
PBANKA_0408600	eukaryotic translation initiation factor 3 subunit K, putative	EIF3K	0.19	0.992399	0.00331375
PBANKA_0101900	RNA-binding protein, putative	N/A	0.19	0.993078	0.00301659
PBANKA_0522800	40S ribosomal protein S19, putative	RPS19	0.19	0.998858	0.000496462
PBANKA_0719100	conserved Plasmodium protein, unknown function	N/A	0.18	0.224609	0.648573
PBANKA_0617000	cell division control protein CDC50A, putative	CDC50A	0.18	0.424349	0.372277
PBANKA_1457400	N-alpha-acetyltransferase 15, NatA auxiliary subunit, putative	N/A	0.18	0.457703	0.339416
PBANKA_0505100	ADP-ribosylation factor 1, putative	ARF1	0.18	0.470344	0.327585
PBANKA_1127000	choline/ethanolaminephosphotransferase	CEPT	0.18	0.574886	0.240418
PBANKA_1211000	GMP synthase [glutamine-hydrolyzing], putative	GMPS	0.18	0.608668	0.215619
PBANKA_0415500	coatomer subunit beta, putative	SEC27	0.18	0.677255	0.169248
PBANKA_0100900	ATP-dependent RNA helicase MTR4, putative	MTR4	0.18	0.708674	0.149554
PBANKA_1118600	cell division cycle protein 48 homologue, putative	N/A	0.18	0.734246	0.134158
PBANKA_1035100	rRNA 2'-O-methyltransferase fibrillarin, putative	NOP1	0.18	0.915502	0.0383408
PBANKA_0417500	60S ribosomal protein L32, putative	RPL32	0.18	0.951616	0.0215382
PBANKA_1032300	CTP synthase, putative	CTPS	0.18	0.95542	0.0198058
PBANKA_0513600	adenosine deaminase, putative	ADA	0.18	0.964871	0.0155306
PBANKA_1329300	40S ribosomal protein S3, putative	N/A	0.18	0.965241	0.0153645
PBANKA_1033900	40S ribosomal protein S8e, putative	N/A	0.18	0.966697	0.0147096
PBANKA_1423500	60S ribosomal protein L13-2, putative	N/A	0.18	0.988573	0.00499135
PBANKA_1013100	60S ribosomal protein L14, putative	N/A	0.18	0.995014	0.00217089
PBANKA_1456900	translation initiation factor SUI1, putative	N/A	0.18	0.997544	0.00106802
PBANKA_0311000	protein transport protein SEC31, putative	SEC31	0.18	0.998746	0.000545122
PBANKA_1310800	40S ribosomal protein S5, putative	N/A	0.18	0.999217	0.000340188
PBANKA_1030000	deoxyhypusine synthase	DHS	0.18	0.999996	1.63e-06
PBANKA_0100800	zinc finger protein, putative	N/A	0.18	0.999997	1.12e-06
PBANKA_1459900	signal recognition particle receptor subunit beta, putative	SRPRB	0.17	0.0151057	1.82086
PBANKA_1226500	proteasome subunit beta type-4, putative	N/A	0.17	0.279353	0.553847
PBANKA_0404400	cytochrome b-c1 complex subunit 8, putative	QCR8	0.17	0.319026	0.496174
PBANKA_1429300	integral membrane protein GPR180	GPR180	0.17	0.435784	0.360729
PBANKA_0919000	26S proteasome regulatory subunit RPN7, putative	RPN7	0.17	0.444612	0.352018
PBANKA_0207000	calcium-transporting ATPase, putative	SERCA	0.17	0.457881	0.339247
PBANKA_0401800	lipin, putative	N/A	0.17	0.505019	0.296692
PBANKA_1434700	clathrin heavy chain, putative	CHC	0.17	0.513555	0.289413
PBANKA_0506900	phospholipid scramblase, putative	PLSCR	0.17	0.609681	0.214897
PBANKA_0708000	protein transport protein SEC23, putative	SEC23	0.17	0.651627	0.186001
PBANKA_1441400	proliferating cell nuclear antigen 2	PCNA2	0.17	0.658646	0.181348
PBANKA_0916600	oxysterol-binding protein, putative	N/A	0.17	0.68063	0.167089
PBANKA_0834400	mitochondrial-processing peptidase subunit beta, putative	QCR1	0.17	0.691697	0.160084
PBANKA_1452000	hydrolase, putative	N/A	0.17	0.692598	0.159519
PBANKA_1429500	DNA-directed RNA polymerases I, II, and III subunit RPABC3, putative	RPB8	0.17	0.716533	0.144764
PBANKA_1023000	myosin-specific chaperone UNC, putative	UNC	0.17	0.731342	0.135879
PBANKA_1406700	carbamoyl phosphate synthetase, putative	CPSII	0.17	0.822626	0.0847975
PBANKA_0702800	protein disulfide-isomerase, putative	N/A	0.17	0.845126	0.0730785
PBANKA_1014400	acid phosphatase, putative	N/A	0.17	0.863569	0.063703
PBANKA_0720000	conserved Plasmodium protein, unknown function	N/A	0.17	0.947572	0.0233876
PBANKA_0937200	RNA-binding protein, putative	N/A	0.17	0.952975	0.0209186
PBANKA_1322400	exonuclease V, mitochondrial, putative	N/A	0.17	0.977606	0.00983608
PBANKA_1130500	proteasome subunit alpha type-7, putative	N/A	0.17	0.989806	0.00444984
PBANKA_1417800	tRNA (guanine(26)-N(2))-dimethyltransferase, putative	TRM1	0.17	0.99158	0.00367236
PBANKA_1207200	adenylate kinase, putative	AK1	0.17	0.997842	0.000938235
PBANKA_1348500	Voldacs domain-containing protein, putative	N/A	0.17	0.998364	0.000710939
PBANKA_0824800	polyadenylate-binding protein 2, putative	PABP2	0.17	1	1.62e-08
PBANKA_0904400	transcription initiation factor IIF subunit beta, putative	TFG2	0.16	0.0610656	1.2142
PBANKA_1310400	centrin-2, putative	CEN2	0.16	0.25327	0.596416
PBANKA_1317500	glucose-6-phosphate dehydrogenase-6-phosphogluconolactonase, putative	GluPho	0.16	0.456973	0.340109
PBANKA_1209900	conserved protein, unknown function	N/A	0.16	0.626324	0.203201
PBANKA_1230200	cdc2-related protein kinase 5	CRK5	0.16	0.742355	0.129388
PBANKA_1202200	U5 small nuclear ribonucleoprotein component, putative	EFTUD2	0.16	0.767018	0.115194
PBANKA_0208100	heptatricopeptide repeat and RAP domain-containing protein, putative	N/A	0.16	0.80811	0.0925295
PBANKA_1223800	V-type proton ATPase subunit a, putative	N/A	0.16	0.820777	0.0857751
PBANKA_0305900	protein P22	Pb22	0.16	0.846549	0.072348
PBANKA_1424400	CS domain protein, putative	N/A	0.16	0.908371	0.0417367
PBANKA_0203000	chromatin assembly factor 1 subunit C, putative	CAF1C	0.16	0.924757	0.0339724
PBANKA_1442200	protein SOC2	SOC2	0.16	0.955722	0.0196683
PBANKA_0918000	60S acidic ribosomal protein P0, putative	N/A	0.16	0.968277	0.0140005
PBANKA_1456100	40S ribosomal protein S17, putative	N/A	0.16	0.968574	0.0138673
PBANKA_0701500	prohibitin 1	PHB1	0.16	0.976198	0.0104621
PBANKA_1346700	60S ribosomal protein L23, putative	N/A	0.16	0.992664	0.00319788
PBANKA_1331400	MORC family protein, putative	MORC	0.16	0.994046	0.00259349
PBANKA_1355500	casein kinase II beta chain, putative	CK2beta2	0.16	0.997506	0.00108446
PBANKA_1234800	40S ribosomal protein S9, putative	RPS9	0.16	0.998397	0.000696789
PBANKA_1226100	conserved Plasmodium protein, unknown function	N/A	0.16	0.998762	0.000538155
PBANKA_1450600	vesicle transport v-SNARE protein VTI1, putative	N/A	0.16	0.999379	0.000269595
PBANKA_1309500	conserved Plasmodium protein, unknown function	N/A	0.16	0.999409	0.000256877
PBANKA_0709000	protein transport protein SEC61 subunit beta, putative	SEC61B	0.16	0.999884	5.04e-05
PBANKA_0412800	eukaryotic translation initiation factor 4E, putative	eIF4E	0.15	0.260066	0.584916
PBANKA_1039600	26S proteasome regulatory subunit RPN6, putative	RPN6	0.15	0.461529	0.335801
PBANKA_1445800	ras-related protein Rab-2, putative	RAB2	0.15	0.461565	0.335767
PBANKA_1303700	vesicle-associated membrane protein, putative	N/A	0.15	0.554153	0.25637
PBANKA_0105600	translation initiation factor IF-2, putative	N/A	0.15	0.57724	0.238643
PBANKA_0604200	zinc finger protein, putative	N/A	0.15	0.622451	0.205895
PBANKA_1003100	pre-mRNA-processing-splicing factor 8, putative	PRPF8	0.15	0.631618	0.199546
PBANKA_1434800	phospholipid-transporting ATPase 2, putative	ATP2	0.15	0.701034	0.154261
PBANKA_1441100	haloacid dehalogenase-like hydrolase, putative	HAD2	0.15	0.831707	0.0800294
PBANKA_0938600	casein kinase 2, alpha subunit	CK2alpha	0.15	0.8847	0.0532038
PBANKA_0109600	ATP synthase-associated protein, putative	N/A	0.15	0.896602	0.0474002
PBANKA_0101000	MYND-type zinc finger protein, putative	N/A	0.15	0.900859	0.045343
PBANKA_0921500	small nuclear ribonucleoprotein F, putative	SNRPF	0.15	0.929851	0.0315865
PBANKA_1408000	H/ACA ribonucleoprotein complex subunit 1, putative	GAR1	0.15	0.962891	0.0164227
PBANKA_1030400	MORN repeat protein, putative	MORN (1030400)	0.15	0.970944	0.0128058
PBANKA_1305100	60S ribosomal protein L1, putative	N/A	0.15	0.972603	0.0120645
PBANKA_1242300	Hsc70-interacting protein, putative	HIP	0.15	0.972886	0.0119381
PBANKA_0819300	eukaryotic translation initiation factor 3 subunit F, putative	EIF3F	0.15	0.977248	0.00999525
PBANKA_0502200	26S proteasome regulatory subunit p55, putative	RPN5	0.15	0.992999	0.00305127
PBANKA_0618900	rhoptry protein, putative	N/A	0.15	0.99591	0.0017798
PBANKA_0929900	heat shock protein 90, putative	N/A	0.15	0.998277	0.000749072
PBANKA_1102900	cell division control protein 6, putative	CDC6	0.15	0.999952	2.07e-05
PBANKA_1431900	glycerol-3-phosphate dehydrogenase [NAD(+)], putative	N/A	0.14	0.617914	0.209072
PBANKA_0610400	non-SERCA-type Ca2+ -transporting P-ATPase, putative	ATP4	0.14	0.784028	0.105668
PBANKA_1345800	RNA-binding protein, putative	N/A	0.14	0.84555	0.072861
PBANKA_0720200	protein SOC1	SOC1	0.14	0.846219	0.0725171
PBANKA_0501300	DNA polymerase delta catalytic subunit, putative	N/A	0.14	0.888504	0.0513408
PBANKA_1207000	nucleolar protein 5, putative	NOP5	0.14	0.913624	0.0392324
PBANKA_1222800	tyrosine--tRNA ligase, putative	TyrRS	0.14	0.91721	0.0375314
PBANKA_0411300	conserved Plasmodium protein, unknown function	N/A	0.14	0.927741	0.0325733
PBANKA_0607900	cGMP-specific 3',5'-cyclic phosphodiesterase alpha, putative	PDEalpha	0.14	0.929134	0.0319216
PBANKA_0711900	heat shock protein 70	HSP70	0.14	0.936589	0.0284511
PBANKA_1430900	SUN domain-containing protein, putative	N/A	0.14	0.943692	0.0251699
PBANKA_0901200	peroxisome assembly protein 22, putative	PEX22	0.14	0.955068	0.0199657
PBANKA_1122000	nuclear polyadenylated RNA-binding protein NAB2	NAB2	0.14	0.996123	0.00168702
PBANKA_1223000	conserved Plasmodium protein, unknown function	N/A	0.14	0.996566	0.00149411
PBANKA_1144000	26S proteasome regulatory subunit RPN11, putative	RPN11	0.14	0.999927	3.15e-05
PBANKA_1231200	phosducin-like protein 1, putative	PhLP1	0.14	1	1.07e-08
PBANKA_0418200	ras-related protein RAB7, putative	RAB7	0.13	0.358379	0.445657
PBANKA_0206000	ATP synthase-associated protein, putative	N/A	0.13	0.368374	0.433711
PBANKA_0402000	palmitoyltransferase DHHC1, putative	DHHC1	0.13	0.442076	0.354503
PBANKA_0110400	eukaryotic translation initiation factor 3 subunit L, putative	EIF3L	0.13	0.479478	0.319232
PBANKA_0211500	proteasome subunit alpha type-5, putative	N/A	0.13	0.548721	0.260649
PBANKA_1324100	ubiquitin carboxyl-terminal hydrolase isozyme L3, putative	UCHL3	0.13	0.59696	0.224054
PBANKA_1428500	glycerol-3-phosphate 1-O-acyltransferase, putative	N/A	0.13	0.743188	0.128901
PBANKA_1408500	ATP synthase subunit O, mitochondrial, putative	OSCP	0.13	0.785267	0.104983
PBANKA_1317400	HSP90 co-chaperone p23, putative	P23	0.13	0.78665	0.104218
PBANKA_1008800	glucose-6-phosphate isomerase, putative	N/A	0.13	0.844665	0.0733155
PBANKA_0519900	conserved Plasmodium protein, unknown function	N/A	0.13	0.88148	0.0547877
PBANKA_0313800	ATP synthase subunit alpha, mitochondrial, putative	N/A	0.13	0.887753	0.0517079
PBANKA_0602800	ubiquitin-conjugating enzyme E2, putative	UBC	0.13	0.950637	0.0219851
PBANKA_1017900	phosphoenolpyruvate carboxylase	PEPC	0.13	0.960816	0.0173598
PBANKA_0922100	40S ribosomal protein S18, putative	RPS18	0.13	0.984887	0.00661342
PBANKA_1458300	kinesin-13	N/A	0.13	0.996276	0.00162012
PBANKA_1323200	AP-4 complex accessory subunit Tepsin, putative	N/A	0.13	0.999826	7.56e-05
PBANKA_1010000	mitochondrial acidic protein MAM33, putative	N/A	0.13	0.99997	1.32e-05
PBANKA_1117100	histone H3 variant	H3.3	0.13	1	1.54e-07
PBANKA_0706800	DnaJ protein, putative	N/A	0.12	0.321927	0.492242
PBANKA_1326300	cytochrome c1, heme protein, mitochondrial, putative	CYT1	0.12	0.505594	0.296199
PBANKA_1320700	signal peptide peptidase, putative	SPP	0.12	0.6406	0.193413
PBANKA_1104200	2-oxoisovalerate dehydrogenase subunit beta, mitochondrial, putative	BCKDHB	0.12	0.64251	0.19212
PBANKA_1329700	26S proteasome regulatory subunit RPN2, putative	RPN2	0.12	0.721338	0.141861
PBANKA_0314600	thioesterase/thiol ester dehydrase-isomerase, putative	N/A	0.12	0.738526	0.131634
PBANKA_1232100	serine/arginine-rich splicing factor 1, putative	SR1	0.12	0.941116	0.0263568
PBANKA_1224500	Dpy-19-like C-mannosyltransferase	DPY19	0.12	0.946181	0.0240259
PBANKA_0414600	40S ribosomal protein S15A, putative	N/A	0.12	0.983292	0.00731742
PBANKA_0917400	armadillo repeat protein PF16	PF16	0.12	0.99025	0.00425507
PBANKA_1037900	conserved Plasmodium protein, unknown function	N/A	0.12	0.995611	0.00191043
PBANKA_0909100	ER membrane protein complex subunit 8, putative	EMC8	0.12	0.996578	0.00148856
PBANKA_1432000	signal recognition particle subunit SRP19, putative	SRP19	0.12	0.997579	0.00105277
PBANKA_1437400	diphthine--ammonia ligase, putative	DPH6	0.12	0.998109	0.00082219
PBANKA_0720300	eukaryotic translation initiation factor 3 subunit M, putative	EIF3M	0.12	0.998911	0.000473374
PBANKA_1406600	CCAAT-binding transcription factor, putative	N/A	0.12	0.999581	0.000181844
PBANKA_1244500	SNARE protein, putative	N/A	0.12	0.99974	0.000113134
PBANKA_1314800	elongation factor 2, putative	eEF2	0.12	0.999991	3.77e-06
PBANKA_0202300	UMP-CMP kinase, putative	N/A	0.11	0.29372	0.532067
PBANKA_1208500	PI31 domain-containing protein, putative	N/A	0.11	0.306209	0.513983
PBANKA_1411100	2-oxoisovalerate dehydrogenase subunit alpha, mitochondrial	BCKDHA	0.11	0.312241	0.50551
PBANKA_1014900	coatomer subunit beta, putative	N/A	0.11	0.458749	0.338425
PBANKA_0210200	aspartate--tRNA ligase, putative	N/A	0.11	0.556694	0.254384
PBANKA_1120800	signal recognition particle subunit SRP68, putative	SRP68	0.11	0.561239	0.250852
PBANKA_0903900	coatomer subunit gamma, putative	SEC21	0.11	0.596913	0.224089
PBANKA_1446800	60 kDa chaperonin, putative	CPN60	0.11	0.739118	0.131286
PBANKA_0811600	selenide water dikinase, putative	N/A	0.11	0.79613	0.0990159
PBANKA_0613200	DNA polymerase alpha catalytic subunit A, putative	N/A	0.11	0.814653	0.0890275
PBANKA_0704500	HECT-like E3 ubiquitin ligase, putative	HEUL	0.11	0.834175	0.0787428
PBANKA_1306800	Sec7 domain-containing protein ARFGEF, putative	ARFGEF	0.11	0.835646	0.0779775
PBANKA_0913700	coatomer subunit delta, putative	N/A	0.11	0.839909	0.0757677
PBANKA_1334100	proteasome subunit beta type-2, putative	N/A	0.11	0.869555	0.0607028
PBANKA_0618300	Ham1-like protein, putative	N/A	0.11	0.873728	0.0586237
PBANKA_1409000	ER membrane protein complex subunit 7, putative	EMC7	0.11	0.887502	0.0518306
PBANKA_1438300	phospholipid-transporting ATPase, putative	N/A	0.11	0.901532	0.0450187
PBANKA_1355100	40S ribosomal protein S6, putative	N/A	0.11	0.906691	0.0425407
PBANKA_1137900	proliferating cell nuclear antigen 1, putative	PCNA1	0.11	0.910369	0.0407825
PBANKA_1213100	prohibitin 2	PHB2	0.11	0.919707	0.0363504
PBANKA_0707500	RWD domain-containing protein, putative	N/A	0.11	0.937623	0.0279718
PBANKA_1349400	DNA replication complex GINS protein, putative	N/A	0.11	0.949722	0.0224034
PBANKA_1434200	arginine--tRNA ligase, putative	RRS	0.11	0.957774	0.0187371
PBANKA_0823900	DNA-directed RNA polymerase II subunit RPB3, putative	RPB3	0.11	0.987137	0.00562236
PBANKA_0411700	HSP20-like chaperone, putative	N/A	0.11	0.996137	0.00168079
PBANKA_0904100	ras-related protein Rab-6	RAB6	0.11	0.999158	0.000365948
PBANKA_1413100	lipoate-protein ligase 1	LipL1	0.11	0.999504	0.000215448
PBANKA_1137800	glideosome-associated connector	GAC	0.11	0.999556	0.000192802
PBANKA_1143600	alanine--tRNA ligase, putative	AlaRS	0.11	0.99989	4.78e-05
PBANKA_1010200	methionine aminopeptidase 2, putative	METAP2	0.11	0.999984	6.91e-06
PBANKA_1446900	dihydrolipoyl dehydrogenase, mitochondrial, putative	LPD1	0.1	0.476535	0.321905
PBANKA_0211300	cysteine desulfurase IscS, putative	NFS1	0.1	0.612917	0.212598
PBANKA_1145500	nuclear cap-binding protein subunit 1, putative	N/A	0.1	0.74274	0.129163
PBANKA_0912100	casein kinase 1, putative	CK1	0.1	0.762364	0.117837
PBANKA_1133300	elongation factor 1-alpha	EF-1alpha	0.1	0.772947	0.11185
PBANKA_0109100	transketolase, putative	TK	0.1	0.799183	0.097354
PBANKA_1023400	glutathione reductase, putative	GR	0.1	0.802144	0.0957477
PBANKA_1144100	ABC transporter E family member 1, putative	ABCE1	0.1	0.822292	0.084974
PBANKA_0805500	conserved Plasmodium protein, unknown function	N/A	0.1	0.824148	0.0839946
PBANKA_1333800	RAP protein RAP21, putative	N/A	0.1	0.837309	0.0771141
PBANKA_1308200	1-acyl-sn-glycerol-3-phosphate acyltransferase, putative	LPAAT	0.1	0.841768	0.0748074
PBANKA_0832600	proteasome subunit beta type-6, putative	N/A	0.1	0.846254	0.0724995
PBANKA_1134200	pyrroline-5-carboxylate reductase, putative	N/A	0.1	0.865831	0.0625667
PBANKA_0209900	nucleoside transporter 4, putative	NT4	0.1	0.898448	0.0465072
PBANKA_1028300	serine/threonine protein phosphatase PP1	PP1	0.1	0.954155	0.0203809
PBANKA_1325300	splicing factor 3B subunit 2, putative	SF3B2	0.1	0.954425	0.0202581
PBANKA_1343300	proteasome subunit beta type-7, putative	N/A	0.1	0.967966	0.0141398
PBANKA_0939900	U6 snRNA-associated Sm-like protein LSm4, putative	LSM4	0.1	0.973048	0.0118657
PBANKA_0712100	DNA helicase, putative	N/A	0.1	0.978634	0.0093799
PBANKA_1432500	DNA-binding chaperone, putative	N/A	0.1	0.986898	0.0057277
PBANKA_1423300	DNA/RNA-binding protein Alba 1, putative	ALBA1	0.1	0.990424	0.00417878
PBANKA_0905600	translation initiation factor eIF-1A, putative	N/A	0.1	0.991423	0.00374102
PBANKA_0919800	bifunctional farnesyl/geranylgeranyl diphosphate synthase, putative	FPPS/GGPPS	0.1	0.996564	0.00149465
PBANKA_0618400	tetratricopeptide repeat protein, putative	N/A	0.1	0.996597	0.00148035
PBANKA_0611800	N-acetyltransferase, GNAT family, putative	NAT8	0.1	0.997249	0.00119646
PBANKA_1348100	AMMECR1 domain-containing protein, putative	N/A	0.1	0.997283	0.00118139
PBANKA_0607400	protein phosphatase PPM11, putative	PPM11	0.1	0.999903	4.2e-05
PBANKA_0717900	RNA-binding protein, putative	N/A	0.1	0.999999	5.45e-07
PBANKA_0828900	conserved Plasmodium protein, unknown function	N/A	0.1	1	9.24e-08
PBANKA_1222400	ubiquitin regulatory protein, putative	N/A	0.1	1	1.24e-08
PBANKA_1025200	H/ACA ribonucleoprotein complex subunit 4, putative	CBF5	0.09	0.709113	0.149285
PBANKA_1323000	conserved protein, unknown function	N/A	0.09	0.760868	0.118691
PBANKA_1211300	autophagy-related protein 18, putative	ATG18	0.09	0.780638	0.10755
PBANKA_0943100	CCR4-NOT transcription complex subunit NOT1-G, putative	NOT1-G	0.09	0.794526	0.099892
PBANKA_0302000	translocation protein SEC66, putative	SEC66	0.09	0.798382	0.0977891
PBANKA_1415000	pre-mRNA-processing factor 40, putative	PRP40	0.09	0.819374	0.0865178
PBANKA_0912600	conserved Plasmodium protein, unknown function	N/A	0.09	0.836398	0.0775869
PBANKA_0806700	conserved Plasmodium protein, unknown function	PI3K/PI4K	0.09	0.909129	0.0413746
PBANKA_1205000	G-strand-binding protein 2	GBP2	0.09	0.917518	0.0373856
PBANKA_1425000	RNA-binding protein, putative	N/A	0.09	0.939158	0.0272611
PBANKA_1425100	karyopherin alpha, putative	KARalpha	0.09	0.959424	0.0179893
PBANKA_0205200	conserved Plasmodium protein, unknown function	N/A	0.09	0.971649	0.0124904
PBANKA_1437200	conserved Plasmodium protein, unknown function	N/A	0.09	0.979725	0.00889561
PBANKA_0717000	ATPase GET3, putative	GET3	0.09	0.993702	0.00274401
PBANKA_0922300	threonine--tRNA ligase, putative	ThrRS	0.09	0.996978	0.00131438
PBANKA_1343200	conserved Plasmodium protein, unknown function	N/A	0.09	0.999737	0.000114285
PBANKA_0615200	calcium-dependent protein kinase 4	CDPK4	0.09	0.999988	5.36e-06
PBANKA_1420300	conserved Plasmodium protein, unknown function	N/A	0.09	1	1.82e-07
PBANKA_1347700	isoleucine--tRNA ligase, putative	N/A	0.08	0.666029	0.176507
PBANKA_0418000	ATP-dependent RNA helicase DDX60, putative	DDX60	0.08	0.722223	0.141329
PBANKA_0603200	eukaryotic translation initiation factor 5A, putative	EIF5A	0.08	0.746916	0.126728
PBANKA_0911800	DnaJ protein, putative	N/A	0.08	0.756792	0.121023
PBANKA_1121700	leucine--tRNA ligase, putative	N/A	0.08	0.760176	0.119086
PBANKA_1436200	histone-lysine N-methyltransferase, H3 lysine-4 specific, putative	SET10	0.08	0.801268	0.0962225
PBANKA_1210100	DNA repair protein RAD23, putative	RAD23	0.08	0.819227	0.0865957
PBANKA_0804600	ATPase family AAA domain-containing protein 3A, putative	N/A	0.08	0.874829	0.0580769
PBANKA_1009300	clathrin light chain, putative	CLC	0.08	0.88125	0.0549009
PBANKA_0938900	IWS1-like protein, putative	N/A	0.08	0.897977	0.0467349
PBANKA_0914300	protein disulfide-isomerase, putative	N/A	0.08	0.900177	0.0456719
PBANKA_1038200	nuclear formin-like protein MISFIT	MISFIT	0.08	0.901926	0.0448292
PBANKA_1105100	DNA mismatch repair protein MSH6, putative	MSH6	0.08	0.909574	0.0411618
PBANKA_1205900	AP2 domain transcription factor AP2-I, putative	ApiAP2	0.08	0.925852	0.0334587
PBANKA_0804900	E3 ubiquitin-protein ligase, putative	N/A	0.08	0.962664	0.0165253
PBANKA_1335200	pre-mRNA-splicing factor ISY1, putative	ISY1	0.08	0.96301	0.0163692
PBANKA_1222000	histone deacetylase complex subunit SAP18, putative	SAP18	0.08	0.979451	0.00901719
PBANKA_1434100	dynamin-like protein, putative	DRPC	0.08	0.989871	0.0044212
PBANKA_1242800	eukaryotic translation initiation factor 3 subunit E, putative	EIF3E	0.08	0.993337	0.00290354
PBANKA_0819900	nucleosome assembly protein	NAPS	0.08	0.99395	0.00263552
PBANKA_1404900	26S protease regulatory subunit 10B, putative	RPT4	0.08	0.997525	0.00107641
PBANKA_0928500	ATP-dependent zinc metalloprotease FTSH, putative	N/A	0.08	0.999901	4.29e-05
PBANKA_0108800	histone H3	H3	0.08	0.999949	2.22e-05
PBANKA_0818600	pre-mRNA-splicing factor ATP-dependent RNA helicase PRP43, putative	PRP43	0.07	0.569965	0.244152
PBANKA_1124800	conserved Plasmodium protein, unknown function	N/A	0.07	0.687829	0.162519
PBANKA_0401900	DNA-directed RNA polymerases I, II, and III subunit RPABC2, putative	RPB6	0.07	0.756248	0.121336
PBANKA_1460400	peptidyl-prolyl cis-trans isomerase FKBP35, putative	FKBP35	0.07	0.823745	0.084207
PBANKA_1433000	conserved protein, unknown function	N/A	0.07	0.886855	0.0521473
PBANKA_1217800	signal peptidase complex subunit 2, putative	SPC25	0.07	0.886951	0.0521004
PBANKA_1444100	T-complex protein 1 subunit gamma, putative	CCT3	0.07	0.909583	0.0411575
PBANKA_1359200	DNA/RNA-binding protein Alba 2, putative	ALBA2	0.07	0.919264	0.0365597
PBANKA_1213000	transcriptional coactivator ADA2, putative	ADA2	0.07	0.922846	0.0348705
PBANKA_1455300	tetratricopeptide repeat protein, putative	N/A	0.07	0.930796	0.0311455
PBANKA_0604700	shewanella-like protein phosphatase 2, putative	SHLP2	0.07	0.932482	0.0303594
PBANKA_0920000	multiprotein-bridging factor 1, putative	MBF1	0.07	0.933156	0.0300457
PBANKA_0602000	origin recognition complex subunit 1, putative	ORC1	0.07	0.961355	0.017116
PBANKA_1421900	GTP-binding translation elongation factor, putative	N/A	0.07	0.974812	0.0110791
PBANKA_0303300	conserved Plasmodium protein, unknown function	N/A	0.07	0.986381	0.00595528
PBANKA_1326000	GTP-binding protein, putative	N/A	0.07	0.989077	0.00477001
PBANKA_0307800	conserved Plasmodium protein, unknown function	N/A	0.07	0.989955	0.00438442
PBANKA_1230500	THO complex subunit 4, putative	ALYREF	0.07	0.990709	0.00405385
PBANKA_0203800	phenylalanine--tRNA ligase alpha subunit, putative	N/A	0.07	0.994975	0.00218796
PBANKA_0942500	thioredoxin-like mero protein, putative	Trx-mero	0.07	0.997305	0.00117216
PBANKA_1115800	conserved Plasmodium protein, unknown function	N/A	0.07	0.998768	0.000535177
PBANKA_0942900	phenylalanine--tRNA ligase beta subunit, putative	N/A	0.07	0.999063	0.000407052
PBANKA_0921600	alternative splicing factor SR-MG	SR-MG	0.07	0.999989	4.72e-06
PBANKA_1117700	malate dehydrogenase, putative	MDH	0.06	0.56301	0.249484
PBANKA_1016300	proliferation-associated protein 2g4, putative	N/A	0.06	0.695797	0.157517
PBANKA_1138700	conserved Plasmodium protein, unknown function	N/A	0.06	0.751186	0.124253
PBANKA_1139400	polyubiquitin binding protein, putative	DOA1	0.06	0.765833	0.115866
PBANKA_1359600	6-cysteine protein P48/45	P48/45	0.06	0.842808	0.0742714
PBANKA_1111800	glutathione synthetase	GS	0.06	0.878356	0.0563294
PBANKA_0619900	Obg-like ATPase 1, putative	OLA1	0.06	0.897968	0.046739
PBANKA_0315800	ribosome associated membrane protein RAMP4, putative	N/A	0.06	0.90598	0.0428815
PBANKA_1344300	chromatin assembly factor 1 subunit B, putative	CAF1B	0.06	0.915997	0.0381059
PBANKA_0617200	40S ribosomal protein S10, putative	RPS10	0.06	0.919193	0.0365935
PBANKA_0401500	exportin-1, putative	N/A	0.06	0.950515	0.0220411
PBANKA_0505300	conserved Plasmodium protein, unknown function	N/A	0.06	0.962002	0.0168242
PBANKA_1138200	RuvB-like helicase 3, putative	RUVB3	0.06	0.966396	0.014845
PBANKA_1348900	chaperone binding protein, putative	N/A	0.06	0.972947	0.0119108
PBANKA_1431100	conserved Plasmodium protein, unknown function	N/A	0.06	0.983044	0.00742711
PBANKA_0920100	prefoldin subunit 5	PCS5	0.06	0.985683	0.00626288
PBANKA_1002000	Ran-binding protein, putative	N/A	0.06	0.998486	0.000657997
PBANKA_1313800	signal recognition particle subunit SRP54, putative	SRP54	0.06	0.999567	0.000188073
PBANKA_1340400	lactate dehydrogenase, putative	N/A	0.06	0.999611	0.000168897
PBANKA_0803100	DNA replication licensing factor MCM7, putative	MCM7	0.06	0.999833	7.23e-05
PBANKA_0202700	kinesin-8B	N/A	0.06	0.999912	3.82e-05
PBANKA_0312400	DNA-directed RNA polymerase II subunit RPB2, putative	RPB2	0.06	0.999922	3.39e-05
PBANKA_1341500	RNA-binding protein, putative	N/A	0.06	0.999951	2.14e-05
PBANKA_1310500	apicomplexan kinetochore protein 4	AKIT4	0.06	1	3.96e-08
PBANKA_0206300	centrin-1, putative	CEN1	0.05	0.430314	0.366215
PBANKA_1424200	conserved protein, unknown function	N/A	0.05	0.807266	0.0929831
PBANKA_1426700	hydroxymethyldihydropterin pyrophosphokinase-dihydropteroate synthase, putative	PPPK-DHPS	0.05	0.815282	0.0886921
PBANKA_0820600	pyridoxal phosphate homeostasis protein, putative	N/A	0.05	0.816278	0.088162
PBANKA_0715900	ubiquitin carboxyl-terminal hydrolase 13, putative	USP13	0.05	0.831234	0.0802765
PBANKA_0938400	endoplasmic reticulum-resident calcium binding protein, putative	ERC	0.05	0.846474	0.0723862
PBANKA_1403800	translational activator GCN1, putative	GCN1	0.05	0.857808	0.0666101
PBANKA_1410300	M1-family alanyl aminopeptidase, putative	M1AAP	0.05	0.882448	0.0543109
PBANKA_0936500	replication factor C subunit 5, putative	RFC5	0.05	0.88686	0.052145
PBANKA_1220300	prodrug activation and resistance esterase, putative	PARE	0.05	0.895856	0.047762
PBANKA_1223300	ras-related protein Rab-18, putative	RAB18	0.05	0.897236	0.0470932
PBANKA_1340000	dihydrofolate synthase/folylpolyglutamate synthase, putative	DHFS-FPGS	0.05	0.903426	0.0441074
PBANKA_0610900	HSP40, subfamily A, putative	HSP40	0.05	0.9618	0.0169153
PBANKA_0813900	26S proteasome regulatory subunit RPN8, putative	RPN8	0.05	0.962847	0.0164427
PBANKA_0417800	protein hook, putative	N/A	0.05	0.964971	0.0154859
PBANKA_0910200	protein phosphatase PPM2	PPM2	0.05	0.977076	0.0100716
PBANKA_1322700	ATP-dependent RNA helicase DBP5, putative	DBP5	0.05	0.984143	0.00694185
PBANKA_0210600	ubiquitin carboxyl-terminal hydrolase, putative	N/A	0.05	0.984225	0.00690581
PBANKA_0906900	DnaJ domain-containing protein, putative	N/A	0.05	0.9864	0.00594712
PBANKA_0711200	ubiquitin-like protein, putative	N/A	0.05	0.99197	0.00350156
PBANKA_1418900	ras-related protein Rab-11A	Rab11a	0.05	0.995617	0.00190755
PBANKA_0522700	alpha tubulin 2	N/A	0.05	0.996306	0.00160722
PBANKA_0826700	lipocalin, parasitophorous vacuolar protein 5	PV5	0.05	0.998868	0.000491695
PBANKA_0301900	Sel1 repeat-containing protein, putative	N/A	0.05	0.999993	3.16e-06
PBANKA_0941100	conserved Apicomplexan protein, unknown function	N/A	0.05	1	1.6e-07
PBANKA_1332100	zinc finger protein, putative	N/A	0.04	0.493817	0.306434
PBANKA_1350700	tryptophan--tRNA ligase, putative	cTrpRS	0.04	0.741054	0.13015
PBANKA_0920900	protein disulfide-isomerase, putative	N/A	0.04	0.806554	0.0933663
PBANKA_1018500	transcription factor BTF3, putative	BTF3	0.04	0.823668	0.0842478
PBANKA_0817700	RNA-binding protein musashi, putative	HoMu	0.04	0.87938	0.0558236
PBANKA_1022800	glycine--tRNA ligase, putative	GlyRS	0.04	0.889166	0.051017
PBANKA_0921300	deoxyuridine 5'-triphosphate nucleotidohydrolase, putative	N/A	0.04	0.89996	0.0457766
PBANKA_0615400	serine--tRNA ligase, putative	N/A	0.04	0.907229	0.0422832
PBANKA_0919600	CCR4-NOT transcription complex subunit 2, putative	NOT2	0.04	0.925902	0.0334348
PBANKA_1219300	heat shock protein 110, putative	HSP110c	0.04	0.929257	0.031864
PBANKA_1439400	histone chaperone ASF1, putative	ASF1	0.04	0.958091	0.0185934
PBANKA_0824700	thioredoxin reductase, putative	TRXR	0.04	0.975806	0.0106366
PBANKA_0401600	N-ethylmaleimide-sensitive fusion protein, putative	NSF	0.04	0.983183	0.00736572
PBANKA_0924800	golgi protein 2	GP2	0.04	0.988386	0.00507336
PBANKA_1420100	conserved Plasmodium protein, unknown function	N/A	0.04	0.990005	0.00436264
PBANKA_0509700	dynein, putative	N/A	0.04	0.99128	0.00380382
PBANKA_0910800	conserved Plasmodium protein, unknown function	N/A	0.04	0.996956	0.00132391
PBANKA_1438000	cAMP-dependent protein kinase regulatory subunit, putative	PKAr	0.04	0.998745	0.000545347
PBANKA_1131600	DNA replication licensing factor MCM6, putative	MCM6	0.04	0.998863	0.000493894
PBANKA_1034400	plasmepsin IV	PM4	0.04	0.999988	5.23e-06
PBANKA_1339900	SNARE protein, putative	N/A	0.03	0.835151	0.0782351
PBANKA_0104700	elongation of fatty acids protein, putative	ELO-B	0.03	0.85131	0.0699122
PBANKA_0107300	T-complex protein 1 subunit zeta, putative	CCT6	0.03	0.875438	0.0577744
PBANKA_1231500	ubiquitin carboxyl-terminal hydrolase 2, putative	N/A	0.03	0.93981	0.0269599
PBANKA_1450400	peptidase, putative	N/A	0.03	0.948797	0.0228266
PBANKA_1111400	inositol-3-phosphate synthase, putative	INO1	0.03	0.95426	0.0203331
PBANKA_1405000	MORN repeat protein, putative	N/A	0.03	0.963705	0.016056
PBANKA_1428900	bromodomain protein 2, putative	BDP2	0.03	0.972098	0.0122898
PBANKA_1206600	26S protease regulatory subunit 4, putative	N/A	0.03	0.972343	0.0121803
PBANKA_1125300	centrosomal protein CEP135, putative	CEP135	0.03	0.981856	0.00795225
PBANKA_1108600	alpha-soluble NSF attachment protein, putative	N/A	0.03	0.988155	0.00517501
PBANKA_0929700	haloacid dehalogenase-like hydrolase, putative	N/A	0.03	0.994335	0.00246743
PBANKA_1415600	DNA replication licensing factor MCM4, putative	MCM4	0.03	0.99607	0.00171018
PBANKA_1029600	conserved Plasmodium protein, unknown function	N/A	0.03	0.996862	0.00136504
PBANKA_0314200	calcium-dependent protein kinase 1	CDPK1	0.03	0.996898	0.00134927
PBANKA_1227400	serine/threonine protein phosphatase 2B catalytic subunit A	CNA	0.03	0.999969	1.36e-05
PBANKA_0416400	ATP synthase-associated protein, putative	N/A	0.02	0.561832	0.250393
PBANKA_1316400	U1 snRNP-associated protein, putative	N/A	0.02	0.734231	0.134168
PBANKA_0207200	V-type proton ATPase subunit C, putative	N/A	0.02	0.782526	0.106501
PBANKA_1454600	nucleoporin NUP269	NUP269	0.02	0.819961	0.086207
PBANKA_1336100	dihydroorotase, putative	DHOase	0.02	0.832282	0.0797295
PBANKA_0809100	proteasome activator 28, putative	PA28	0.02	0.846755	0.0722421
PBANKA_1137200	protein transport protein Sec24A, putative	SEC24A	0.02	0.887225	0.0519665
PBANKA_1306300	protein KIC9, putative	N/A	0.02	0.898163	0.0466447
PBANKA_0703900	receptor for activated c kinase, putative	RACK1	0.02	0.925533	0.0336081
PBANKA_1028100	mRNA-capping enzyme subunit alpha, putative	N/A	0.02	0.932097	0.030539
PBANKA_1213700	methionine aminopeptidase 1b, putative	METAP1b	0.02	0.96081	0.0173625
PBANKA_1130400	proteasome subunit alpha type-4, putative	N/A	0.02	0.965961	0.0150405
PBANKA_1223100	proteasome subunit alpha type-6, putative	N/A	0.02	0.974213	0.0113462
PBANKA_1137500	actin-depolymerizing factor 2	ADF2	0.02	0.980503	0.00855122
PBANKA_1135000	YOP1-like protein, putative	YOP1L	0.02	0.982049	0.00786691
PBANKA_0516600	leucine-rich repeat protein 1	LRR1	0.02	0.982487	0.00767314
PBANKA_0316000	replication factor C subunit 1, putative	RFC1	0.02	0.98954	0.00456658
PBANKA_1129600	TPH domain-containing protein, putative	N/A	0.02	0.998758	0.000539596
PBANKA_0404300	P-loop containing nucleoside triphosphate hydrolase, putative	N/A	0.02	0.999878	5.29e-05
PBANKA_1123800	GAS8-like protein, putative	N/A	0.02	0.999906	4.08e-05
PBANKA_1131900	serine/threonine protein phosphatase 5	PP5	0.02	0.999998	8.14e-07
PBANKA_0509800	cytochrome c oxidase copper chaperone, putative	COX17	0.02	1	2.19e-08
PBANKA_0825600	splicing factor 3A subunit 3, putative	SF3A3	0.01	0.623523	0.205148
PBANKA_1356700	kelch protein K13, putative	Kelch13	0.01	0.685157	0.16421
PBANKA_0834300	gamma-tubulin complex component, putative	N/A	0.01	0.689537	0.161443
PBANKA_0414800	arginase	N/A	0.01	0.776434	0.109896
PBANKA_0304300	adenylosuccinate lyase, putative	ADSL	0.01	0.809072	0.092013
PBANKA_1127700	nicotinate phosphoribosyltransferase, putative	NAPRT	0.01	0.880107	0.0554646
PBANKA_0927200	conserved protein, unknown function	N/A	0.01	0.903764	0.0439449
PBANKA_0414500	protein YOP1	YOP1	0.01	0.914391	0.0388682
PBANKA_1410400	V-type proton ATPase catalytic subunit A, putative	N/A	0.01	0.95982	0.01781
PBANKA_1003800	V-type proton ATPase subunit B, putative	N/A	0.01	0.970027	0.0132162
PBANKA_1358700	conserved Plasmodium protein, unknown function	N/A	0.01	0.972327	0.0121875
PBANKA_0706700	dicarboxylate/tricarboxylate carrier, putative	DTC	0.01	0.972559	0.0120841
PBANKA_1014600	serine/threonine protein phosphatase 2A activator, putative	PTPA	0.01	0.984287	0.00687823
PBANKA_0520400	dynamin-like protein, putative	DYN2	0.01	0.987974	0.00525442
PBANKA_1312000	condensin-2 complex subunit G2, putative	CAPG2	0.01	0.99063	0.00408834
PBANKA_1233100	proteasome subunit beta type-1, putative	N/A	0.01	0.992148	0.00342351
PBANKA_0836300	cytoadherence linked asexual protein 9	CLAG9	0.01	0.994325	0.0024718
PBANKA_0801500	conserved Plasmodium protein, unknown function	N/A	0.01	0.995051	0.00215455
PBANKA_1417900	conserved protein, unknown function	N/A	0.01	0.996031	0.0017271
PBANKA_1429600	proline--tRNA ligase	PRS	0	0.709741	0.1489
PBANKA_1462000	THUMP domain-containing protein, putative	N/A	0	0.762382	0.117827
PBANKA_1309700	ATP-dependent RNA helicase DDX17, putative	DDX17	0	0.809703	0.091674
PBANKA_0306800	ATP-dependent RNA helicase UAP56, putative	UAP56	0	0.870706	0.0601284
PBANKA_0602200	signal recognition particle subunit SRP14, putative	SRP14	0	0.892776	0.0492576
PBANKA_1217600	histone H2A.Z, putative	H2A.Z	0	0.894765	0.0482911
PBANKA_1452500	conserved Plasmodium protein, unknown function	N/A	0	0.898898	0.0462897
PBANKA_0929800	insulinase, putative	N/A	0	0.912107	0.0399541
PBANKA_1350600	nuclear movement protein, putative	NUDC	0	0.93985	0.0269413
PBANKA_1129100	DNA polymerase epsilon catalytic subunit A, putative	N/A	0	0.959136	0.0181198
PBANKA_1414400	exportin-T, putative	N/A	0	0.959578	0.0179199
PBANKA_0517800	Sec1 family protein, putative	SLY1	0	0.964426	0.015731
PBANKA_0809400	plasma membrane protein 1	PMP1	0	0.97624	0.0104436
PBANKA_1135200	GTP-binding protein, putative	N/A	0	0.986368	0.00596116
PBANKA_0510200	conserved Plasmodium protein, unknown function	N/A	0	0.986608	0.00585515
PBANKA_1415500	U4/U6.U5 tri-snRNP-associated protein 2, putative	USP39	0	0.988713	0.00492964
PBANKA_1302600	DNA primase small subunit, putative	N/A	0	0.990614	0.00409532
PBANKA_1206100	eukaryotic translation initiation factor 3 subunit D, putative	EIF3D	0	0.994004	0.00261182
PBANKA_1331300	WD repeat-containing protein, putative	N/A	0	0.994069	0.00258348
PBANKA_0303900	pantothenate transporter	PAT	0	0.99624	0.00163603
PBANKA_0818500	conserved protein, unknown function	N/A	0	0.999514	0.000211062
PBANKA_1005800	conserved Plasmodium protein, unknown function	N/A	0	0.999686	0.0001363
PBANKA_0916100	nucleic acid binding protein, putative	N/A	0	0.999935	2.84e-05
PBANKA_1218500	protein phosphatase inhibitor 2, putative	N/A	0	0.999944	2.43e-05
PBANKA_0820700	TLD domain-containing protein	N/A	0	0.999988	5.05e-06
PBANKA_1337600	BRCT domain-containing protein, putative	N/A	0	0.999995	1.99e-06
PBANKA_0714200	chaperone protein ClpB1, putative	ClpB1	-0.01	0.75646	0.121214
PBANKA_1103000	serine/arginine-rich splicing factor 12, putative	SRSF12	-0.01	0.758382	0.120112
PBANKA_0923700	ethanolamine kinase, putative	EK	-0.01	0.783069	0.1062
PBANKA_1023500	eukaryotic translation initiation factor 3 subunit H, putative	EIF3H	-0.01	0.858595	0.0662116
PBANKA_1237800	multidrug resistance protein 1, putative	MDR1	-0.01	0.898088	0.046681
PBANKA_1362900	lysine--tRNA ligase, putative	KRS1	-0.01	0.912612	0.039714
PBANKA_1208700	succinate dehydrogenase subunit 4, putative	SDH4	-0.01	0.960376	0.0175589
PBANKA_0622700	mago nashi protein homologue, putative	N/A	-0.01	0.965212	0.0153773
PBANKA_1402600	DNA ligase I, putative	N/A	-0.01	0.978362	0.00950044
PBANKA_1356300	CDT1-like protein, putative	N/A	-0.01	0.979989	0.0087787
PBANKA_0406800	pre-mRNA-processing factor 19, putative	PRPF19	-0.01	0.982624	0.00761244
PBANKA_1330000	enkurin domain-containing protein, putative	N/A	-0.01	0.995589	0.00191975
PBANKA_0922500	kelch domain-containing protein, putative	N/A	-0.01	0.997631	0.00103005
PBANKA_0415800	WD repeat-containing protein 66, putative	WDR66	-0.01	0.998257	0.000757772
PBANKA_0924100	thioredoxin-like protein, putative	N/A	-0.01	0.9999	4.36e-05
PBANKA_0933700	mitogen-activated protein kinase 2	MAPK2	-0.01	0.999944	2.44e-05
PBANKA_1360500	ethanolamine-phosphate cytidylyltransferase	ECT	-0.01	0.999968	1.39e-05
PBANKA_0613700	RNA-binding protein, putative	N/A	-0.01	0.999981	8.1e-06
PBANKA_1323700	FYVE and coiled-coil domain-containing protein, putative	FCP	-0.02	0.669901	0.173989
PBANKA_1405500	exosome complex component RRP40, putative	RRP40	-0.02	0.672787	0.172122
PBANKA_1216500	peptidyl-prolyl cis-trans isomerase, putative	CYP19A	-0.02	0.680566	0.16713
PBANKA_1120200	pyridoxine biosynthesis protein PDX1, putative	PDX1	-0.02	0.716488	0.144791
PBANKA_1424300	NPL domain-containing protein, putative	N/A	-0.02	0.733264	0.13474
PBANKA_1326800	replication factor C subunit 3, putative	RFC3	-0.02	0.808637	0.0922465
PBANKA_1024900	DNA replication licensing factor MCM2, putative	MCM2	-0.02	0.824731	0.0836876
PBANKA_0600500	GPN-loop GTPase, putative	N/A	-0.02	0.861599	0.0646946
PBANKA_0508100	chromodomain-helicase-DNA-binding protein 1, putative	CHD1	-0.02	0.872109	0.0594293
PBANKA_1218200	T-complex protein 1 subunit epsilon, putative	CCT5	-0.02	0.89491	0.0482206
PBANKA_0933800	conserved Plasmodium protein, unknown function	N/A	-0.02	0.922481	0.0350424
PBANKA_1455100	replication factor C subunit 4, putative	RFC4	-0.02	0.936	0.0287239
PBANKA_1308600	fructose-bisphosphate aldolase 2	ALDO2	-0.02	0.940283	0.0267415
PBANKA_0930900	ubiquitin carboxyl-terminal hydrolase UCH54, putative	UCH54	-0.02	0.974473	0.0112304
PBANKA_1336300	GTPase-activating protein, putative	N/A	-0.02	0.975809	0.010635
PBANKA_0610200	DNA replication licensing factor MCM5, putative	MCM5	-0.02	0.981114	0.00828055
PBANKA_0807900	nucleoporin NUP335	NUP335	-0.02	0.98772	0.00536629
PBANKA_0605500	conserved Plasmodium protein, unknown function	N/A	-0.02	0.998601	0.00060806
PBANKA_0942400	WD repeat-containing protein, putative	N/A	-0.02	0.998808	0.000518203
PBANKA_1122800	ribonuclease H2 subunit A, putative	N/A	-0.02	0.999889	4.84e-05
PBANKA_1133200	cdc2-related kinase 2	CRK2	-0.02	0.999973	1.18e-05
PBANKA_0803600	importin-7, putative	N/A	-0.03	0.631503	0.199624
PBANKA_0504800	conserved Plasmodium protein, unknown function	N/A	-0.03	0.723799	0.140382
PBANKA_1126400	transportin, putative	N/A	-0.03	0.801148	0.0962872
PBANKA_1331100	conserved Plasmodium protein, unknown function	N/A	-0.03	0.806762	0.0932543
PBANKA_1420600	histone H2B variant, putative	H2B.Z	-0.03	0.808656	0.0922362
PBANKA_0715600	26S protease regulatory subunit 6B, putative	RPT3	-0.03	0.899178	0.0461541
PBANKA_1226600	tubulin gamma chain, putative	N/A	-0.03	0.936139	0.0286597
PBANKA_0821700	inosine-5'-monophosphate dehydrogenase, putative	N/A	-0.03	0.971184	0.0126987
PBANKA_0706400	conserved Plasmodium protein, unknown function	N/A	-0.03	0.977914	0.00969941
PBANKA_1238200	DnaJ protein, putative	N/A	-0.03	0.987123	0.00562895
PBANKA_1207700	zinc finger protein, putative	ZNF2	-0.03	0.991779	0.00358524
PBANKA_1206900	tubulin beta chain, putative	N/A	-0.03	0.997982	0.000877165
PBANKA_0807100	stomatin-like protein	STOML	-0.03	0.998805	0.000519468
PBANKA_0912200	signal recognition particle subunit SRP72, putative	SRP72	-0.03	0.999458	0.000235296
PBANKA_1029400	conserved Plasmodium protein, unknown function	N/A	-0.03	0.999877	5.35e-05
PBANKA_0406300	DNA polymerase delta small subunit, putative	N/A	-0.03	0.999991	3.95e-06
PBANKA_0602500	threonylcarbamoyl-AMP synthase, putative	SUA5	-0.03	0.999992	3.51e-06
PBANKA_1112400	orotate phosphoribosyltransferase, putative	OPRT	-0.04	0.581038	0.235795
PBANKA_0502600	peptidase, putative	N/A	-0.04	0.62948	0.201018
PBANKA_1347400	DNA-(apurinic or apyrimidinic site) lyase 1	APN1	-0.04	0.660425	0.180177
PBANKA_1238800	karyopherin beta, putative	N/A	-0.04	0.760198	0.119073
PBANKA_0721700	ran-specific GTPase-activating protein 1, putative	RANBP1	-0.04	0.834123	0.0787698
PBANKA_1422400	importin subunit beta, putative	N/A	-0.04	0.834786	0.078425
PBANKA_0701600	coiled-coil domain-containing protein 124, putative	CCDC124	-0.04	0.853755	0.0686669
PBANKA_0926900	WD repeat-containing protein, putative	N/A	-0.04	0.855316	0.0678732
PBANKA_0810600	exoribonuclease, putative	N/A	-0.04	0.874414	0.0582829
PBANKA_0903600	dynamin-like protein, putative	DYN1	-0.04	0.908838	0.0415135
PBANKA_0604300	tetratricopeptide repeat protein, putative	TRP1	-0.04	0.940755	0.0265237
PBANKA_1405100	V-type proton ATPase subunit H, putative	N/A	-0.04	0.94377	0.0251339
PBANKA_0833600	importin alpha re-exporter, putative	CSE1	-0.04	0.948282	0.0230625
PBANKA_1208800	MORN repeat protein, putative	N/A	-0.04	0.998395	0.000697398
PBANKA_1320500	V-type H(+)-translocating pyrophosphatase, putative	VP1	-0.04	0.999449	0.000239223
PBANKA_1036000	transcription elongation factor SPT6, putative	SPT6	-0.04	0.99978	9.56e-05
PBANKA_1443000	NIMA related kinase 1, putative	NEK1	-0.04	0.999993	2.96e-06
PBANKA_1222300	coatomer subunit epsilon, putative	SEC28	-0.05	0.628607	0.201621
PBANKA_1126200	protein DJ-1, putative	DJ1	-0.05	0.705237	0.151665
PBANKA_1122400	superoxide dismutase [Fe], putative	SOD2	-0.05	0.798899	0.0975081
PBANKA_0204800	secreted ookinete protein, putative	PSOP24	-0.05	0.863518	0.0637285
PBANKA_1426100	conserved protein, unknown function	N/A	-0.05	0.871626	0.0596697
PBANKA_0602700	nucleosome assembly protein, putative	NAPL	-0.05	0.941935	0.0259791
PBANKA_1406500	conserved Plasmodium protein, unknown function	N/A	-0.05	0.978501	0.00943856
PBANKA_1427200	protein phosphatase PPM5	PPM5	-0.05	0.989633	0.00452596
PBANKA_1040100	choline kinase	CK	-0.05	0.992519	0.00326129
PBANKA_0205400	proteasome subunit beta type-3, putative	N/A	-0.05	0.999885	5.01e-05
PBANKA_1030100	actin II	ACT2	-0.05	0.999936	2.8e-05
PBANKA_0717500	nuclear cap-binding protein subunit 2, putative	CBP20	-0.05	0.999972	1.23e-05
PBANKA_1318100	aminopeptidase P, putative	APP	-0.06	0.616503	0.210065
PBANKA_0930300	GTP-binding nuclear protein RAN/TC4, putative	N/A	-0.06	0.653982	0.184434
PBANKA_1439800	splicing factor 3B subunit 6, putative	SF3B6	-0.06	0.679426	0.167858
PBANKA_0819800	gamma-glutamylcysteine synthetase	gammaGCS	-0.06	0.818904	0.0867669
PBANKA_1323300	pyridoxal 5'-phosphate synthase, putative	N/A	-0.06	0.941937	0.0259779
PBANKA_1108700	structural maintenance of chromosomes protein 4	SMC4	-0.06	0.960805	0.0173647
PBANKA_0816400	ATP-dependent 6-phosphofructokinase, putative	PFK9	-0.06	0.962458	0.0166184
PBANKA_0517500	bromodomain protein 1, putative	BDP1	-0.06	0.972181	0.0122527
PBANKA_1450200	serine hydroxymethyltransferase, putative	SHMT	-0.06	0.985499	0.00634389
PBANKA_1331600	leucine-rich repeat protein	LRR14.1	-0.06	0.997798	0.000957401
PBANKA_1361600	E1-E2 ATPase, putative	N/A	-0.06	0.999188	0.000352673
PBANKA_0822900	dynein intermediate chain, putative	N/A	-0.06	0.999536	0.000201538
PBANKA_1418300	golgi protein 1, putative	PRP2	-0.06	0.999948	2.27e-05
PBANKA_1126500	acetyl-CoA synthetase, putative	ACAS	-0.07	0.621837	0.206323
PBANKA_1326900	DNA polymerase alpha subunit B, putative	N/A	-0.07	0.775838	0.110229
PBANKA_0416800	ubiquitin specific protease, putative	N/A	-0.07	0.777977	0.109033
PBANKA_0806800	coiled-coil domain-containing protein CCDC148/CCDC112, putative	N/A	-0.07	0.805287	0.0940495
PBANKA_0104100	aurora-related kinase ARK1, putative	ARK1	-0.07	0.920333	0.036055
PBANKA_1241800	DNA replication licensing factor MCM3, putative	MCM3	-0.07	0.940921	0.0264468
PBANKA_1026600	protein SEY1, putative	SEY1	-0.07	0.945183	0.0244841
PBANKA_1006100	flap endonuclease 1, putative	FEN1	-0.07	0.95164	0.0215275
PBANKA_0713900	adenylate kinase 2, putative	AK2	-0.07	0.96188	0.0168792
PBANKA_1030300	nuclear transport factor 2, putative	NTF2	-0.07	0.963912	0.0159626
PBANKA_1440700	ubiquitin-activating enzyme E1, putative	UBA1	-0.07	0.990624	0.00409132
PBANKA_0601200	dynein heavy chain, putative	N/A	-0.07	0.991037	0.00391
PBANKA_0611600	ribonucleoside-diphosphate reductase large subunit, putative	N/A	-0.07	0.993404	0.00287415
PBANKA_0708100	dynein light chain 1	DLC1	-0.07	0.994671	0.0023206
PBANKA_0302300	aspartate aminotransferase, putative	AspAT	-0.07	0.995303	0.00204469
PBANKA_0816200	ribonuclease H2 subunit C, putative	N/A	-0.07	0.997707	0.000997145
PBANKA_0405400	40S ribosomal protein S12, putative	RPS12	-0.07	0.999713	0.00012465
PBANKA_1356400	DNA repair protein RAD5, putative	RAD5	-0.07	0.999756	0.000105813
PBANKA_1343000	ribose-phosphate pyrophosphokinase, putative	N/A	-0.08	0.551461	0.258486
PBANKA_1356900	U4/U6 small nuclear ribonucleoprotein PRP4, putative	PRPF4	-0.08	0.598237	0.223127
PBANKA_1308900	histidine--tRNA ligase, putative	N/A	-0.08	0.614218	0.211677
PBANKA_1321500	conserved Plasmodium protein, unknown function	N/A	-0.08	0.677343	0.169191
PBANKA_0937900	conserved Plasmodium protein, unknown function	N/A	-0.08	0.786927	0.104066
PBANKA_1318400	6-phosphogluconate dehydrogenase, decarboxylating, putative	6PGD	-0.08	0.821972	0.0851428
PBANKA_0823400	phosphoglycerate kinase, putative	PGK	-0.08	0.848363	0.0714181
PBANKA_1310200	nucleoporin NUP313	NUP313	-0.08	0.86493	0.0630191
PBANKA_0829700	guanylate kinase, putative	GK	-0.08	0.866951	0.0620055
PBANKA_1309900	M17 leucyl aminopeptidase, putative	LAP	-0.08	0.873495	0.0587395
PBANKA_1451600	SUMO-activating enzyme subunit 2, putative	UBA2	-0.08	0.929846	0.031589
PBANKA_1201500	respiratory chain complex 4 associated protein 3, putative	N/A	-0.08	0.944791	0.0246642
PBANKA_0507800	conserved protein, unknown function	N/A	-0.08	0.954643	0.0201589
PBANKA_0811300	exportin-7, putative	N/A	-0.08	0.989028	0.00479142
PBANKA_1038900	condensin complex subunit 1, putative	CAPD2	-0.08	0.99527	0.00205915
PBANKA_1232200	FACT complex subunit SPT16	FACT-L	-0.08	0.997952	0.000890396
PBANKA_0908500	myosin K	MyoK	-0.08	0.999929	3.08e-05
PBANKA_1427000	protein phosphatase PPM7	PPM7	-0.08	0.99998	8.58e-06
PBANKA_0813000	inhibitor of cysteine proteases	ICP	-0.09	0.293746	0.532027
PBANKA_1137000	bergheilysin	BLN	-0.09	0.569754	0.244313
PBANKA_0107400	ornithine aminotransferase, putative	OAT	-0.09	0.662801	0.178617
PBANKA_0719600	memo-like protein	N/A	-0.09	0.682326	0.166008
PBANKA_0830900	leucine-rich repeat protein	LRR8	-0.09	0.853774	0.0686569
PBANKA_1365200	thioredoxin-related protein, putative	N/A	-0.09	0.901101	0.0452263
PBANKA_0406500	T-complex protein 1 subunit eta, putative	CCT7	-0.09	0.905067	0.0433191
PBANKA_0416600	replication protein A1, small fragment	N/A	-0.09	0.948324	0.0230434
PBANKA_0307100	conserved Plasmodium protein, unknown function	N/A	-0.09	0.949495	0.0225073
PBANKA_0615700	dynein heavy chain, putative	N/A	-0.09	0.99399	0.0026178
PBANKA_1426500	cullin-1	CUL1	-0.09	0.996009	0.00173685
PBANKA_0719300	bifunctional dihydrofolate reductase-thymidylate synthase, putative	DHFR-TS	-0.09	0.997121	0.001252
PBANKA_0403800	transporter, putative	N/A	-0.09	0.999192	0.000351062
PBANKA_0835300	V-type proton ATPase subunit E, putative	N/A	-0.09	0.999527	0.000205317
PBANKA_0612300	apicomplexan kinetochore protein 7	AKIT7	-0.09	0.999855	6.3e-05
PBANKA_1234400	zinc finger protein, putative	N/A	-0.1	0.424082	0.372551
PBANKA_1452600	calcyclin binding protein, putative	N/A	-0.1	0.667385	0.175624
PBANKA_1344400	AMP deaminase	AMPD	-0.1	0.698288	0.155965
PBANKA_0503200	eukaryotic translation initiation factor subunit eIF2A, putative	N/A	-0.1	0.918226	0.0370506
PBANKA_1305300	FACT complex subunit SSRP1, putative	FACT-S	-0.1	0.993886	0.00266335
PBANKA_0310500	conserved Plasmodium protein, unknown function	N/A	-0.1	0.995675	0.00188241
PBANKA_0104400	nucleoside diphosphate kinase, putative	N/A	-0.1	0.998544	0.00063263
PBANKA_1034100	FANCJ-like helicase, putative	FANCJ	-0.1	0.999978	9.54e-06
PBANKA_0835600	cAMP-dependent protein kinase catalytic subunit, putative	PKAc	-0.1	0.999991	3.92e-06
PBANKA_0802300	HECT-type E3 ubiquitin ligase UT, putative	N/A	-0.11	0.0043517	2.36134
PBANKA_1340300	phosphoribosylpyrophosphate synthetase, putative	N/A	-0.11	0.591076	0.228356
PBANKA_1318900	methyltransferase AAMT, putative	N/A	-0.11	0.630276	0.200469
PBANKA_1210800	hypoxanthine-guanine phosphoribosyltransferase, putative	HGPRT	-0.11	0.662965	0.178509
PBANKA_0407500	N2227-like protein, putative	N/A	-0.11	0.683984	0.164954
PBANKA_0314700	replication factor C subunit 2, putative	RFC2	-0.11	0.694708	0.158198
PBANKA_1341600	translation initiation factor eIF-2B subunit gamma, putative	N/A	-0.11	0.739041	0.131332
PBANKA_1134100	T-complex protein 1 subunit delta, putative	CCT4	-0.11	0.743066	0.128972
PBANKA_0913000	condensin-2 complex subunit D3, putative	CAPD3	-0.11	0.867103	0.0619295
PBANKA_1319200	AP-1 complex subunit gamma, putative	N/A	-0.11	0.896838	0.0472862
PBANKA_1355000	V-type proton ATPase subunit D, putative	N/A	-0.11	0.991333	0.0037804
PBANKA_0835100	ATP synthase-associated protein, putative	N/A	-0.11	0.997979	0.000878551
PBANKA_1346200	signal peptidase complex catalytic subunit SEC11, putative	SEC11	-0.11	0.999555	0.000193263
PBANKA_0312500	origin recognition complex subunit 5, putative	ORC5	-0.11	0.999583	0.00018117
PBANKA_1112700	conserved protein, unknown function	N/A	-0.11	0.999701	0.000129763
PBANKA_0905800	DnaJ protein, putative	N/A	-0.12	0.41467	0.382298
PBANKA_0932400	berghepain-2	BP2	-0.12	0.557968	0.253391
PBANKA_1010500	Hsp70/Hsp90 organizing protein, putative	HOP	-0.12	0.602105	0.220328
PBANKA_1415100	choline-phosphate cytidylyltransferase	CCT	-0.12	0.653481	0.184767
PBANKA_0310900	T-complex protein 1 subunit theta, putative	CCT8	-0.12	0.659272	0.180935
PBANKA_0805700	heat shock protein 90	HSP90	-0.12	0.696294	0.157207
PBANKA_1011400	DNA topoisomerase 2, putative	TOP2	-0.12	0.77155	0.112636
PBANKA_0505400	conserved Plasmodium protein, unknown function	N/A	-0.12	0.798109	0.097938
PBANKA_0410300	26S proteasome regulatory subunit RPN12, putative	RPN12	-0.12	0.812216	0.0903285
PBANKA_0520700	WD repeat-containing protein, putative	N/A	-0.12	0.941567	0.0261486
PBANKA_0934700	conserved protein, unknown function	N/A	-0.12	0.973531	0.0116503
PBANKA_0702400	conserved protein, unknown function	N/A	-0.13	0.188528	0.724623
PBANKA_0941200	tRNA-splicing ligase RtcB, putative	RTCB	-0.13	0.56973	0.244331
PBANKA_0402800	EH domain-containing protein, putative	EHD	-0.13	0.582175	0.234946
PBANKA_0916200	T-complex protein 1 subunit alpha, putative	TCP1	-0.13	0.607087	0.216749
PBANKA_1444000	macrophage migration inhibitory factor	MIF	-0.13	0.680702	0.167043
PBANKA_0517200	haloacid dehalogenase-like hydrolase, putative	HAD1	-0.13	0.778542	0.108718
PBANKA_0412100	serine/threonine protein phosphatase 6	PPP6	-0.13	0.918402	0.0369671
PBANKA_1228400	mannose-6-phosphate isomerase, putative	N/A	-0.13	0.947693	0.0233324
PBANKA_0702000	coiled-coil domain-containing protein 39, putative	N/A	-0.13	0.983268	0.00732823
PBANKA_1429400	dynein light chain 1, putative	N/A	-0.13	0.990159	0.00429521
PBANKA_0102100	dihydroorotate dehydrogenase, putative	DHODH	-0.14	0.244094	0.612443
PBANKA_1325600	valine--tRNA ligase, putative	N/A	-0.14	0.435259	0.361253
PBANKA_1458000	translation machinery-associated protein 46, putative	N/A	-0.14	0.44307	0.353528
PBANKA_1117400	conserved protein, unknown function	N/A	-0.14	0.498921	0.301968
PBANKA_1119300	ATP synthase-associated protein, putative	N/A	-0.14	0.512345	0.290437
PBANKA_0416500	copper-transporting ATPase	CuTP	-0.14	0.810923	0.0910202
PBANKA_0905700	DNA-directed RNA polymerases I and III subunit RPAC1, putative	RPC40	-0.14	0.974649	0.0111519
PBANKA_0522900	pre-mRNA-splicing helicase BRR2, putative	BRR2	-0.14	0.991356	0.00377035
PBANKA_1109600	conserved Plasmodium protein, unknown function	N/A	-0.14	0.992347	0.00333647
PBANKA_0610500	glutathione peroxidase-like thioredoxin peroxidase	TPx(Gl)	-0.15	0.232051	0.634417
PBANKA_0720600	trafficking protein particle complex subunit 3, putative	BET3	-0.15	0.45019	0.346604
PBANKA_1026200	NADP-specific glutamate dehydrogenase, putative	GDH1	-0.15	0.521142	0.283044
PBANKA_0929600	nucleolar protein 56, putative	NOP56	-0.15	0.587747	0.23081
PBANKA_1115700	kinetochore protein NDC80	NDC80	-0.15	0.743727	0.128586
PBANKA_0310000	protein SIS1, putative	SIS1	-0.15	0.797229	0.0984167
PBANKA_1442300	kinetochore protein SPC24, putative	SPC24	-0.15	0.867949	0.0615058
PBANKA_1304500	protein SOC3	SOC3	-0.15	0.986282	0.00599893
PBANKA_1004000	cytosolic glyoxalase II, putative	cGLO2	-0.15	0.987708	0.00537123
PBANKA_1209400	inner membrane complex sub-compartment protein 1	ISP1	-0.15	0.992921	0.00308551
PBANKA_1337100	splicing factor 1, putative	SF1	-0.15	0.994163	0.0025426
PBANKA_0803000	origin recognition complex subunit 2, putative	ORC2	-0.15	0.999957	1.88e-05
PBANKA_1445500	pre-mRNA-splicing regulator WTAP, putative	WTAP	-0.16	0.243882	0.61282
PBANKA_1036600	ribonucleoside-diphosphate reductase small chain, putative	N/A	-0.16	0.36088	0.442637
PBANKA_1239200	ribosome-interacting GTPase 1, putative	RBG1	-0.16	0.498896	0.30199
PBANKA_1131100	adenylosuccinate synthetase, putative	ADSS	-0.16	0.907191	0.0423014
PBANKA_1361500	WD repeat-containing protein 16, putative	WDR16	-0.16	0.937544	0.0280084
PBANKA_0927700	DDRGK domain-containing protein, putative	N/A	-0.16	0.968872	0.0137334
PBANKA_0917000	conserved Plasmodium protein, unknown function	N/A	-0.16	0.995083	0.00214059
PBANKA_1406200	TOM1-like protein, putative	N/A	-0.17	0.0207351	1.68329
PBANKA_1336400	DnaJ protein, putative	N/A	-0.17	0.297044	0.52718
PBANKA_0509200	Eps15-like protein, putative	N/A	-0.17	0.349015	0.457156
PBANKA_1038000	cytochrome c, putative	N/A	-0.17	0.581513	0.23544
PBANKA_1008000	armadillo-type repeat protein ATRP, putative	ATRP	-0.17	0.605344	0.217998
PBANKA_1357700	aspartate carbamoyltransferase, putative	ATCase	-0.17	0.609214	0.21523
PBANKA_0804100	conserved Plasmodium protein, unknown function	N/A	-0.17	0.706052	0.151163
PBANKA_0719700	conserved Plasmodium protein, unknown function	N/A	-0.17	0.706665	0.150786
PBANKA_0902400	kinesin-X4	N/A	-0.17	0.777499	0.1093
PBANKA_0201800	TatD-like deoxyribonuclease	TatD	-0.17	0.804967	0.0942219
PBANKA_0913600	conserved Plasmodium protein, unknown function	N/A	-0.17	0.929882	0.031572
PBANKA_0302500	hexose transporter	HT1	-0.17	0.975073	0.0109629
PBANKA_0812000	DNA primase large subunit, putative	N/A	-0.18	0.204488	0.689332
PBANKA_1307800	heat shock protein 90, putative	N/A	-0.18	0.44931	0.347454
PBANKA_1205400	rho GTPase-activating protein, putative	N/A	-0.18	0.598388	0.223017
PBANKA_1358300	conserved Plasmodium protein, unknown function	N/A	-0.18	0.808224	0.092468
PBANKA_1416900	structural maintenance of chromosomes protein 2	SMC2	-0.18	0.832482	0.0796252
PBANKA_1314100	E3 ubiquitin-protein ligase ZNF598, putative	N/A	-0.18	0.993236	0.00294767
PBANKA_0513900	ORC3 domain-containing protein, putative	N/A	-0.19	0.340354	0.468069
PBANKA_0405200	T-complex protein 1 subunit beta, putative	CCT2	-0.19	0.426769	0.369807
PBANKA_1328300	ATP-dependent zinc metalloprotease FTSH, putative	N/A	-0.19	0.598814	0.222708
PBANKA_1123500	ISWI chromatin-remodeling complex ATPase, putative	ISWI	-0.19	0.690894	0.160589
PBANKA_0709100	60S ribosomal protein L22, putative	N/A	-0.19	0.732545	0.135165
PBANKA_1405200	conserved Plasmodium protein, unknown function	N/A	-0.19	0.858071	0.066477
PBANKA_0718800	small GTP-binding protein sar1, putative	SAR1	-0.19	0.979149	0.00915134
PBANKA_0406200	conserved Plasmodium protein, unknown function	N/A	-0.19	0.993445	0.00285602
PBANKA_1035700	WD repeat-containing protein 65, putative	WDR65	-0.19	0.999936	2.76e-05
PBANKA_0928100	phosphoglycerate mutase, putative	PGM1	-0.2	0.345749	0.461239
PBANKA_1206300	PHD finger protein PHD1, putative	PHD1	-0.2	0.42448	0.372143
PBANKA_0941800	histone H2B, putative	H2B	-0.2	0.49944	0.301517
PBANKA_1243900	apicomplexan kinetochore protein 5	AKIT5	-0.2	0.808611	0.0922602
PBANKA_1236600	conserved Plasmodium protein, unknown function	N/A	-0.2	0.811286	0.0908261
PBANKA_0417400	GTPase-activating protein, putative	N/A	-0.2	0.939967	0.0268876
PBANKA_1431500	radial spoke protein 9	RSP9	-0.2	0.991696	0.00362163
PBANKA_1326400	glyceraldehyde-3-phosphate dehydrogenase	GAPDH	-0.21	0.657865	0.181863
PBANKA_1125500	ATPase, putative	N/A	-0.21	0.788768	0.103051
PBANKA_1409600	meiosis-specific nuclear structural protein 1, putative	N/A	-0.21	0.886169	0.0524834
PBANKA_0102700	conserved Plasmodium protein, unknown function	N/A	-0.21	0.927951	0.0324751
PBANKA_1427700	RuvB-like helicase 1, putative	RUVB1	-0.21	0.99984	6.96e-05
PBANKA_0925400	dynein heavy chain, putative	N/A	-0.21	0.999878	5.3e-05
PBANKA_0507300	dynein heavy chain, putative	N/A	-0.21	1	1.37e-09
PBANKA_1246161	fam-a protein	N/A	-0.22	0.205307	0.687597
PBANKA_1328100	ATP synthase (C/AC39) subunit, putative	N/A	-0.22	0.3406	0.467755
PBANKA_0941900	histone H4, putative	H4	-0.22	0.557676	0.253618
PBANKA_1214300	enolase, putative	ENO	-0.22	0.578117	0.237984
PBANKA_1228000	1-cys peroxiredoxin, putative	1-CysPxn	-0.22	0.61063	0.214222
PBANKA_1363900	CXXC motif containing zinc binding protein, putative	N/A	-0.22	0.656086	0.18304
PBANKA_0208600	conserved protein, unknown function	N/A	-0.22	0.665942	0.176563
PBANKA_1135500	high mobility group protein B4, putative	HMGB4	-0.22	0.778413	0.10879
PBANKA_0416100	dynein heavy chain, putative	MG1	-0.22	0.999906	4.06e-05
PBANKA_1009700	ribonuclease H2 subunit B, putative	N/A	-0.22	0.999998	1.08e-06
PBANKA_0622000	conserved Plasmodium protein, unknown function	N/A	-0.23	0.192856	0.714767
PBANKA_1122900	hexokinase, putative	HK	-0.23	0.434953	0.361558
PBANKA_0204200	tubulin-specific chaperone a, putative	N/A	-0.23	0.772412	0.112151
PBANKA_1402900	PUB domain-containing protein, putative	N/A	-0.23	0.981724	0.00801047
PBANKA_1129200	conserved Plasmodium protein, unknown function	N/A	-0.23	0.987817	0.00532348
PBANKA_1117000	histone H2A, putative	H2A	-0.23	0.99324	0.00294585
PBANKA_1223400	conserved Plasmodium protein, unknown function	N/A	-0.23	0.9985	0.00065204
PBANKA_1420700	MAATS1 domain-containing protein, putative	N/A	-0.24	0.0280651	1.55183
PBANKA_1237500	pre-mRNA-splicing factor BUD31, putative	BUD31	-0.24	0.371755	0.429743
PBANKA_1010600	calmodulin, putative	CAM	-0.24	0.459588	0.337631
PBANKA_0709400	conserved Plasmodium protein, unknown function	N/A	-0.24	0.505013	0.296697
PBANKA_1102200	merozoite surface protein 8	MSP8	-0.24	0.642013	0.192456
PBANKA_0808900	ATP-dependent protease ATPase subunit ClpY, putative	ClpY	-0.25	0.0945799	1.0242
PBANKA_1446500	asparagine-rich protein, putative	N/A	-0.25	0.558044	0.253332
PBANKA_1320100	conserved Plasmodium protein, unknown function	UIS25	-0.25	0.791201	0.101713
PBANKA_1101600	chromatin assembly factor 1 subunit A, putative	CAF1A	-0.25	0.984911	0.00660307
PBANKA_1033700	conserved Plasmodium protein, unknown function	N/A	-0.26	0.980055	0.00874953
PBANKA_0306100	6-cysteine protein P230	P230	-0.26	0.999992	3.42e-06
PBANKA_1329200	dynein beta chain, putative	N/A	-0.27	0.206022	0.686086
PBANKA_1348000	transmembrane emp24 domain-containing protein, putative	N/A	-0.27	0.547726	0.261436
PBANKA_0107200	conserved Plasmodium protein, unknown function	N/A	-0.27	0.829206	0.0813378
PBANKA_1035900	glycerophosphodiester phosphodiesterase, putative	GDPD	-0.28	0.233423	0.631856
PBANKA_1303800	triosephosphate isomerase, putative	TIM	-0.28	0.384611	0.414979
PBANKA_1016700	leucine-rich repeat protein	N/A	-0.28	0.51604	0.287316
PBANKA_0519200	conserved Plasmodium protein, unknown function	N/A	-0.28	0.976378	0.0103822
PBANKA_1327300	fam-a protein	N/A	-0.29	0.173652	0.760321
PBANKA_0612200	apicomplexan kinetochore protein 3	AKIT3	-0.29	0.346853	0.459855
PBANKA_0830200	high molecular weight rhoptry protein 2	RhopH2	-0.29	0.369227	0.432706
PBANKA_0205000	ELM2 domain-containing protein, putative	N/A	-0.29	0.686115	0.163603
PBANKA_1105500	mediator of RNA polymerase II transcription subunit 11, putative	MED11	-0.29	0.808241	0.0924591
PBANKA_1030600	phospholipase PL39, putative	N/A	-0.3	0.314099	0.502934
PBANKA_0108100	conserved Plasmodium protein, unknown function	N/A	-0.3	0.628384	0.201775
PBANKA_1421100	transcription elongation factor s-II, putative	N/A	-0.31	0.199886	0.699217
PBANKA_0408500	parasite-infected erythrocyte surface protein	PIESP1	-0.31	0.831381	0.0801997
PBANKA_1340100	L-lactate dehydrogenase	LDH	-0.32	0.345692	0.461311
PBANKA_1308000	conserved Plasmodium protein, unknown function	N/A	-0.32	0.993075	0.00301801
PBANKA_1422700	superoxide dismutase [Fe], putative	FeSOD	-0.32	0.998618	0.000600752
PBANKA_1214200	ribonucleoside-diphosphate reductase small chain, putative	N/A	-0.33	0.182737	0.738172
PBANKA_1234200	40S ribosomal protein S24, putative	RPS24	-0.34	0.402571	0.395157
PBANKA_1305000	conserved Plasmodium protein, unknown function	N/A	-0.34	0.566715	0.246635
PBANKA_1333100	protein MGET, putative	N/A	-0.34	0.672067	0.172588
PBANKA_0942300	radial spoke head protein, putative	N/A	-0.35	0.998089	0.0008307
PBANKA_1300096	fam-b protein	N/A	-0.37	0.458768	0.338407
PBANKA_0939300	coiled-coil domain-containing protein 40, putative	N/A	-0.38	0.50112	0.300058
PBANKA_0810800	conserved protein, unknown function	N/A	-0.38	0.629252	0.201176
PBANKA_1348800	origin recognition complex subunit 4, putative	ORC4	-0.38	0.74562	0.127483
PBANKA_0601900	high mobility group protein B1, putative	HMGB1	-0.39	0.325386	0.487601
PBANKA_1428300	WD repeat-containing protein, putative	N/A	-0.39	0.616135	0.210324
PBANKA_1018300	dynein intermediate chain, putative	N/A	-0.41	0.944644	0.0247318
PBANKA_1108000	CFA20 domain-containing protein, putative	N/A	-0.43	0.919458	0.0364681
PBANKA_1449000	microgamete surface protein MiGS, putative	MiGS	-0.46	0.764022	0.116894
PBANKA_0416000	high molecular weight rhoptry protein 3, putative	RhopH3	-0.47	0.185594	0.731437
PBANKA_0834000	calcyclin-binding protein, putative	N/A	-0.47	0.603222	0.219523
PBANKA_0200600	fam-a protein	N/A	-0.48	0.051208	1.29066
PBANKA_1432400	perforin-like protein 2	PLP2	-0.48	0.921161	0.0356646
PBANKA_0919100	parasitophorous vacuolar protein 1	PV1	-0.52	0.0249925	1.60219
PBANKA_0931300	dipeptidyl aminopeptidase 1, putative	DPAP1	-0.53	0.0223887	1.64997
PBANKA_0931200	heat shock protein 101	HSP101	-0.54	0.00566025	2.24716
PBANKA_0913400	protein phosphatase PPM8	PPM8	-0.55	0.0422566	1.37411
PBANKA_1357800	conserved Plasmodium protein, unknown function	N/A	-0.56	0.0866806	1.06208
PBANKA_0911700	subtilisin-like protease 2	SUB2	-0.57	0.218764	0.660024
PBANKA_0316200	Plasmodium exported protein, unknown function	N/A	-0.59	0.0863447	1.06376
PBANKA_0100700	Plasmodium exported protein, unknown function	N/A	-0.6	0.141118	0.850416
PBANKA_0932000	rhoptry neck protein 4	RON4	-0.6	0.702022	0.15365
PBANKA_1222500	plasmepsin X, putative	PMX	-0.62	0.00031086	3.50744
PBANKA_0316800	erythrocyte membrane associated protein 2	EMAP2	-0.63	0.0375436	1.42546
PBANKA_1107100	subtilisin-like protease 1	SUB1	-0.63	0.0941928	1.02598
PBANKA_1237600	zinc finger protein, putative	N/A	-0.64	0.0320872	1.49367
PBANKA_0524300	tryptophan-rich protein IPIS2	IPIS2	-0.65	0.0358501	1.44551
PBANKA_1334300	exported protein 2	EXP2	-0.67	0.106848	0.971234
PBANKA_1146000	tryptophan-rich protein	N/A	-0.68	0.0342573	1.46525
PBANKA_1008500	translocon component PTEX150	PTEX150	-0.69	0.0517798	1.28584
PBANKA_0524200	early transcribed membrane protein	37500	-0.7	0.020983	1.67813
PBANKA_1400600	cytoadherence linked asexual protein, putative	RhopH1A	-0.71	0.146763	0.833383
PBANKA_1224200	DnaJ protein, putative	N/A	-0.72	0.0892224	1.04953
PBANKA_1200600	Plasmodium exported protein, unknown function	N/A	-0.72	0.402452	0.395286
PBANKA_0100200	Plasmodium exported protein, unknown function	N/A	-0.73	0.0422318	1.37436
PBANKA_1465000	fam-c protein	N/A	-0.74	0.322331	0.491698
PBANKA_0305100	serine repeat antigen 1	SERA1	-0.77	0.636878	0.195944
PBANKA_0836800	erythrocyte membrane associated protein 1	EMAP1	-0.78	0.0115646	1.93687
PBANKA_1221600	cell division cycle ATPase, putative	N/A	-0.83	0.0291564	1.53527
PBANKA_1349000	MSP7-like protein	MSRP2	-0.83	0.881837	0.0546116
PBANKA_1032100	rhoptry-associated protein 1	RAP1	-0.84	0.464996	0.332551
PBANKA_0831000	merozoite surface protein 1	MSP1	-0.84	0.702606	0.153288
PBANKA_0305000	serine repeat antigen 2	SERA2	-0.84	0.752871	0.123279
PBANKA_0614000	conserved protein, unknown function	N/A	-0.86	0.00263976	2.57844
PBANKA_1443300	merozoite surface protein 9, putative	N/A	-0.87	0.713164	0.14681
PBANKA_1101400	rhoptry-associated protein 2/3	RAP2/3	-0.89	0.370933	0.430705
PBANKA_0618600	conserved protein, unknown function	N/A	-0.92	0.0205869	1.68641
PBANKA_0926700	exported protein 1	EXP1	-0.93	0.014181	1.84829
PBANKA_0201600	early transcribed membrane protein	ETRAMP	-0.96	0.0139846	1.85435
PBANKA_1000600	erythrocyte membrane antigen 1	N/A	-1.03	0.00231388	2.63566
PBANKA_0623100	tryptophan-rich protein IPIS3	IPIS3	-1.03	0.0118846	1.92502
PBANKA_0300600	Plasmodium exported protein, unknown function	N/A	-1.05	0.0203667	1.69108
PBANKA_1220200	lysophospholipase, putative	N/A	-1.07	0.0118502	1.92627
PBANKA_0311800	acyl-CoA synthetase, putative	ACS9	-1.14	0.00239737	2.62026
PBANKA_0304900	serine repeat antigen 3	SERA3	-1.14	0.0390056	1.40887
PBANKA_1327021	fam-a protein	N/A	-1.15	0.0290108	1.53744
PBANKA_0704700	conserved Plasmodium protein, unknown function	N/A	-1.16	0.0142915	1.84492
PBANKA_0519300	conserved Plasmodium protein, unknown function	N/A	-1.2	0.885929	0.052601
PBANKA_0517000	early transcribed membrane protein	ETRAMP10.2	-1.22	0.00434965	2.36155
PBANKA_0623300	tryptophan-rich protein	N/A	-1.28	0.00963236	2.01627
PBANKA_0501100	early transcribed membrane protein	37865	-1.28	0.0442566	1.35402
PBANKA_1365500	exported protein IBIS1	IBIS1	-1.3	0.00546722	2.26223
PBANKA_0519100	merozoite surface protein, putative	N/A	-1.3	0.486197	0.313188
PBANKA_1229000	Plasmodium exported protein (PHIST), unknown function	N/A	-1.33	0.00780993	2.10735
PBANKA_0512800	merozoite TRAP-like protein	MTRAP	-1.35	0.0096294	2.0164
PBANKA_1312700	gamete egress and sporozoite traversal protein	GEST	-1.38	0.0233299	1.63209
PBANKA_1113400	secreted ookinete protein	PSOP12	-1.39	0.564179	0.248583
PBANKA_0519400	conserved Plasmodium protein, unknown function	N/A	-1.39	0.714356	0.146085
PBANKA_1145900	membrane associated histidine-rich protein 1b	MAHRP1b	-1.4	0.0066094	2.17984
PBANKA_1145800	membrane associated histidine-rich protein 1a	MAHRP1a	-1.44	0.00170739	2.76767
PBANKA_0836200	conserved Plasmodium protein, unknown function	N/A	-1.44	0.0181184	1.74188
PBANKA_1349200	MSP7-like protein	MSRP1	-1.51	0.00967241	2.01447
PBANKA_0519000	S-antigen, putative	N/A	-1.52	0.782774	0.106364
PBANKA_1400700	Plasmodium exported protein, unknown function	N/A	-1.58	0.00150109	2.82359
PBANKA_1101300	skeleton-binding protein 1	SBP1	-1.61	0.00192648	2.71523
PBANKA_1463000	osmiophilic body protein G377	G377	-1.61	0.0198485	1.70227
PBANKA_1432200	male development gene 1	MDV1	-1.7	0.0103626	1.98453
PBANKA_0619200	secreted ookinete protein, putative	PSOP1	-1.7	0.0632841	1.19871
PBANKA_1349300	conserved Plasmodium protein, unknown function	N/A	-1.83	0.00772974	2.11184

## Sheet: Supp. Table 4
Supp. Table 4: Quantitative proteomics of Pbnek4-ko 2 hpa versus WT 2 hpa parasites
Accession	Gene product	Gene symbol	Abundance Ratio (Log2)	Abundance Ratio P-Value	minus log10 p value
PBANKA_0616700	NIMA related kinase 4	NEK4	-2.21	8.33e-05	4.07942
PBANKA_0514900	ookinete surface protein P28	P28	-2.12	0.00441244	2.35532
PBANKA_1134900	zinc finger protein	Pb103	-1.92	0.00838599	2.07645
PBANKA_0515000	ookinete surface protein P25	P25	-1.64	0.00689854	2.16124
PBANKA_0106300	conserved Plasmodium protein, unknown function	106300	-1.52	0.00296609	2.52782
PBANKA_0714000	meiotic recombination protein DMC1	DMC1	-1.25	0.00205946	2.68625
PBANKA_0902900	PH-like domain-containing protein, putative	902900	-1.11	0.00888694	2.05125
PBANKA_1439100	BRO1 domain-containing protein, putative	1439100	-0.99	0.00819305	2.08655
PBANKA_0612400	AP2 domain transcription factor AP2-Z	AP2-Z	-0.9	0.0303236	1.51822
PBANKA_0404600	activator of Hsp90 ATPase, putative	AHA1	-0.71	0.643247	0.191622
PBANKA_0523900	glideosome associated protein with multiple membrane spans 2, putative	GAPM2	-0.67	0.303503	0.517837
PBANKA_0823100	S-adenosylmethionine synthetase, putative	SAMS	-0.63	0.452137	0.34473
PBANKA_0511400	peroxiredoxin, putative	nPrx	-0.62	0.387636	0.411576
PBANKA_1105300	conserved Plasmodium protein, unknown function	N/A	-0.59	0.794701	0.0997962
PBANKA_1035400	glideosome associated protein with multiple membrane spans 3, putative	GAPM3	-0.58	0.0344712	1.46254
PBANKA_1116800	BFR1 domain-containing protein, putative	N/A	-0.58	0.471338	0.326667
PBANKA_1319500	LCCL domain-containing protein	CCP2	-0.54	0.00616195	2.21028
PBANKA_0207500	cyclin-dependent kinases regulatory subunit, putative	N/A	-0.5	0.72072	0.142233
PBANKA_1110500	translationally-controlled tumor protein homolog	TCTP	-0.48	0.115036	0.939168
PBANKA_0943600	60S acidic ribosomal protein P1, putative	N/A	-0.48	0.573668	0.241339
PBANKA_1124900	oxidoreductase, putative	N/A	-0.47	0.480645	0.318175
PBANKA_0934200	ubiquitin domain-containing protein DSK2, putative	DSK2	-0.43	0.0148801	1.82739
PBANKA_1027900	small nuclear ribonucleoprotein-associated protein B, putative	SMB1	-0.43	0.868258	0.061351
PBANKA_0836800	erythrocyte membrane associated protein 1	EMAP1	-0.41	0.220854	0.655894
PBANKA_0923600	GrpE protein homolog, mitochondrial, putative	MGE1	-0.41	0.235646	0.62774
PBANKA_1244000	cell cycle regulator protein, putative	N/A	-0.41	0.351702	0.453825
PBANKA_0206500	ras-related protein Rab-5C, putative	RAB5c	-0.4	0.387947	0.411228
PBANKA_1214700	conserved Plasmodium protein, unknown function	N/A	-0.4	0.587273	0.23116
PBANKA_1218900	elongation factor 1-delta, putative	EF-1delta	-0.39	0.0389033	1.41001
PBANKA_1450700	clustered-asparagine-rich protein, putative	CARP	-0.39	0.320558	0.494093
PBANKA_1113500	ras-related protein Rab-1A, putative	RAB1a	-0.39	0.60634	0.217284
PBANKA_0808200	proteasome subunit alpha type-3, putative	N/A	-0.38	0.571825	0.242737
PBANKA_0807600	40S ribosomal protein S11, putative	RPS11	-0.37	0.319483	0.495552
PBANKA_0917900	26S protease regulatory subunit 6A, putative	RPT5	-0.37	0.527799	0.277531
PBANKA_1307000	apicomplexan kinetochore protein 9	AKIT9	-0.37	0.767441	0.114955
PBANKA_0314500	40S ribosomal protein S26, putative	RPS26	-0.36	0.454457	0.342508
PBANKA_1035100	rRNA 2'-O-methyltransferase fibrillarin, putative	NOP1	-0.36	0.992112	0.00343937
PBANKA_0715700	lysine decarboxylase-like protein, putative	N/A	-0.35	0.12294	0.910307
PBANKA_0928200	conserved protein, unknown function	N/A	-0.35	0.873848	0.0585639
PBANKA_0407700	60S acidic ribosomal protein P2, putative	N/A	-0.34	0.316883	0.4991
PBANKA_0926600	protein GCN20, putative	GCN20	-0.34	0.562156	0.250143
PBANKA_0209900	nucleoside transporter 4, putative	NT4	-0.34	0.842005	0.0746854
PBANKA_1019400	60S ribosomal protein L7-3, putative	N/A	-0.33	0.680921	0.166903
PBANKA_1235600	adenosylhomocysteinase, putative	SAHH	-0.33	0.771655	0.112577
PBANKA_1229200	60S ribosomal protein L19, putative	N/A	-0.33	0.886356	0.052392
PBANKA_1113000	purine nucleoside phosphorylase, putative	PNP	-0.32	0.275029	0.560621
PBANKA_0204500	LCCL domain-containing protein, putative	CCp5	-0.32	0.795126	0.0995641
PBANKA_0819000	glideosome-associated protein 50, putative	GAP50	-0.31	0.262794	0.580384
PBANKA_1324400	60S ribosomal protein L27, putative	RPL27	-0.31	0.842462	0.0744499
PBANKA_0926900	WD repeat-containing protein, putative	N/A	-0.31	0.969817	0.0133102
PBANKA_1445400	protein transport protein SEC13	SEC13	-0.31	0.997444	0.00111162
PBANKA_1019700	NTF2-like domain-containing protein	N/A	-0.3	0.926423	0.0331906
PBANKA_1351300	conserved Plasmodium protein, unknown function	N/A	-0.3	0.999772	9.89e-05
PBANKA_1003300	TMEM33 domain-containing protein	TMEM33	-0.3	0.999901	4.3e-05
PBANKA_0520600	enhancer of rudimentary homolog, putative	ERH	-0.29	0.679295	0.167941
PBANKA_1312000	condensin-2 complex subunit G2, putative	CAPG2	-0.29	0.747913	0.126149
PBANKA_0918300	major facilitator superfamily-related transporter, putative	MFR5	-0.29	0.800772	0.0964909
PBANKA_1144800	conserved protein, unknown function	N/A	-0.29	0.822641	0.0847896
PBANKA_0202500	P-loop containing nucleoside triphosphate hydrolase, putative	N/A	-0.29	0.854006	0.0685391
PBANKA_1105400	small ubiquitin-related modifier, putative	SUMO	-0.28	0.590379	0.228869
PBANKA_1457800	ADP-ribosylation factor GTPase-activating protein 1, putative	ARFGAP1	-0.28	0.643547	0.19142
PBANKA_1112300	ras-related protein Rab-1B, putative	RAB1b	-0.28	0.727256	0.138313
PBANKA_1209800	proteasome subunit beta type-5, putative	N/A	-0.27	0.214473	0.668628
PBANKA_0307000	60S ribosomal protein L37ae, putative	N/A	-0.27	0.341935	0.466056
PBANKA_0418300	protein RER1, putative	RER1	-0.27	0.409005	0.388272
PBANKA_1018100	ABC transporter G family member 2	ABCG2	-0.27	0.494892	0.30549
PBANKA_1236300	ATP-dependent RNA helicase DDX1, putative	DDX1	-0.27	0.552337	0.257796
PBANKA_0826700	lipocalin, parasitophorous vacuolar protein 5	PV5	-0.27	0.828172	0.0818795
PBANKA_1120100	tetratricopeptide repeat protein, putative	N/A	-0.27	0.927771	0.032559
PBANKA_1103100	actin-depolymerizing factor 1	ADF1	-0.26	0.519	0.284833
PBANKA_1322700	ATP-dependent RNA helicase DBP5, putative	DBP5	-0.26	0.636676	0.196081
PBANKA_1354500	60S ribosomal protein L18-2, putative	N/A	-0.26	0.672258	0.172464
PBANKA_1228600	conserved protein, unknown function	N/A	-0.26	0.92069	0.0358864
PBANKA_1317400	HSP90 co-chaperone p23, putative	P23	-0.26	0.932296	0.0304462
PBANKA_0522400	steroid dehydrogenase, putative	N/A	-0.25	0.396884	0.401337
PBANKA_0805200	cytoskeleton associated protein, putative	N/A	-0.25	0.425258	0.371348
PBANKA_0405500	60S ribosomal protein L7, putative	N/A	-0.25	0.526831	0.278329
PBANKA_1431900	glycerol-3-phosphate dehydrogenase [NAD(+)], putative	N/A	-0.25	0.558673	0.252842
PBANKA_0313600	conserved Plasmodium protein, unknown function	N/A	-0.25	0.669367	0.174336
PBANKA_0906500	60S ribosomal protein L28, putative	N/A	-0.25	0.750457	0.124674
PBANKA_0521500	conserved Plasmodium protein, unknown function	N/A	-0.25	0.902353	0.0446237
PBANKA_1215500	translation machinery-associated protein 7, putative	TMA7	-0.25	0.964348	0.0157662
PBANKA_0403000	60S ribosomal protein L44, putative	RPL44	-0.24	0.523163	0.281363
PBANKA_0208000	cyclase-associated protein	C-CAP	-0.24	0.616124	0.210332
PBANKA_1407600	60S ribosomal protein L24, putative	N/A	-0.24	0.65139	0.186159
PBANKA_0918100	60S ribosomal protein L38, putative	RPL38	-0.24	0.690681	0.160722
PBANKA_0924400	13 kDa ribonucleoprotein-associated protein, putative	SNU13	-0.24	0.695234	0.157869
PBANKA_1321000	MA3 domain-containing protein, putative	N/A	-0.24	0.837992	0.0767603
PBANKA_0620200	respiratory chain complex 3 associated protein 1, putative	N/A	-0.24	0.881348	0.0548523
PBANKA_0410600	60S ribosomal protein L26, putative	N/A	-0.24	0.885077	0.0530189
PBANKA_1434800	phospholipid-transporting ATPase 2, putative	ATP2	-0.24	0.907534	0.0421369
PBANKA_1038900	condensin complex subunit 1, putative	CAPD2	-0.24	0.946145	0.0240421
PBANKA_0609900	heat shock protein DNAJ homologue Pfj4, putative	N/A	-0.24	0.982574	0.00763456
PBANKA_0937700	60S ribosomal protein L36, putative	RPL36	-0.24	0.996283	0.00161728
PBANKA_1242700	AP-1/2 complex subunit beta, putative	N/A	-0.23	0.102953	0.987361
PBANKA_0301300	conserved protein, unknown function	N/A	-0.23	0.388405	0.410716
PBANKA_1235300	bis(5'-nucleosyl)-tetraphosphatase [asymmetrical], putative	N/A	-0.23	0.756776	0.121033
PBANKA_1333300	conserved Plasmodium protein, unknown function	N/A	-0.23	0.792472	0.101016
PBANKA_1351800	26S proteasome regulatory subunit RPN3, putative	RPN3	-0.23	0.79851	0.0977194
PBANKA_1217800	signal peptidase complex subunit 2, putative	SPC25	-0.23	0.818187	0.0871472
PBANKA_1306000	replication factor A protein 3, putative	RPA3	-0.23	0.846202	0.0725262
PBANKA_1311700	multidrug resistance protein 2, putative	MDR2	-0.23	0.873135	0.0589187
PBANKA_1117500	ribosomal protein L27a, putative	N/A	-0.23	0.903779	0.0439379
PBANKA_0411300	conserved Plasmodium protein, unknown function	N/A	-0.23	0.935784	0.0288246
PBANKA_1224500	Dpy-19-like C-mannosyltransferase	DPY19	-0.23	0.938568	0.0275342
PBANKA_1413900	zinc finger (CCCH type) protein, putative	N/A	-0.23	0.942344	0.0257905
PBANKA_0511900	60S ribosomal protein L3, putative	RPL3	-0.23	0.948783	0.0228333
PBANKA_1449000	microgamete surface protein MiGS, putative	MiGS	-0.23	0.993767	0.00271563
PBANKA_1141700	ubiquitin-60S ribosomal protein L40, putative	N/A	-0.22	0.158413	0.80021
PBANKA_0209200	parasite-infected erythrocyte surface protein	PIESP15	-0.22	0.265512	0.575916
PBANKA_1008200	cGMP-dependent protein kinase	PKG	-0.22	0.552254	0.257861
PBANKA_1328400	cytochrome c oxidase subunit 6A, putative	COX6A	-0.22	0.752848	0.123293
PBANKA_0941500	40S ribosomal protein S4, putative	RPS4	-0.22	0.849557	0.0708075
PBANKA_1323700	FYVE and coiled-coil domain-containing protein, putative	FCP	-0.21	0.33104	0.48012
PBANKA_1301400	proteasome subunit alpha type-1, putative	N/A	-0.21	0.685024	0.164294
PBANKA_1425400	proteasome activator complex subunit 4, putative	N/A	-0.21	0.709976	0.148756
PBANKA_1222900	26S proteasome regulatory subunit RPN10, putative	RPN10	-0.21	0.711671	0.147721
PBANKA_0403800	transporter, putative	N/A	-0.21	0.719516	0.14296
PBANKA_1320200	STAG domain-containing protein, putative	N/A	-0.21	0.777361	0.109377
PBANKA_0501300	DNA polymerase delta catalytic subunit, putative	N/A	-0.21	0.848389	0.0714052
PBANKA_1010800	CCR4-associated factor 16, putative	CAF16	-0.21	0.865157	0.0629049
PBANKA_1204400	DNA/RNA-binding protein Alba 3, putative	ALBA3	-0.21	0.980161	0.00870276
PBANKA_1325000	40S ribosomal protein S28e, putative	N/A	-0.21	0.999999	6.46e-07
PBANKA_0943200	casein kinase II beta chain, putative	N/A	-0.2	0.137127	0.862877
PBANKA_1310400	centrin-2, putative	CEN2	-0.2	0.505897	0.295938
PBANKA_1120700	nascent polypeptide-associated complex subunit alpha, putative	N/A	-0.2	0.656014	0.183087
PBANKA_0924900	eukaryotic peptide chain release factor GTP-binding subunit, putative	ERF3	-0.2	0.725824	0.139168
PBANKA_0933900	glyoxalase I, putative	GLO1	-0.2	0.73423	0.134168
PBANKA_1033800	conserved protein, unknown function	N/A	-0.2	0.772126	0.112312
PBANKA_0919000	26S proteasome regulatory subunit RPN7, putative	RPN7	-0.2	0.814895	0.0888986
PBANKA_0813500	SAP domain-containing protein, putative	N/A	-0.2	0.865467	0.0627495
PBANKA_0717800	60S ribosomal protein L15, putative	N/A	-0.2	0.894826	0.0482613
PBANKA_1438300	phospholipid-transporting ATPase, putative	N/A	-0.2	0.922064	0.0352389
PBANKA_0107100	proteasome subunit alpha type-2, putative	N/A	-0.2	0.988218	0.00514714
PBANKA_0814200	elongation factor 1-beta, putative	N/A	-0.2	0.993398	0.00287674
PBANKA_1420100	conserved Plasmodium protein, unknown function	N/A	-0.2	0.994009	0.00260956
PBANKA_0109200	transcription elongation factor SPT5, putative	SPT5	-0.2	0.996708	0.00143213
PBANKA_0914400	heat shock protein 70, putative	UIS24	-0.2	0.998213	0.000776884
PBANKA_0315200	small nuclear ribonucleoprotein Sm D2, putative	SNRPD2	-0.19	0.0488677	1.31098
PBANKA_0506600	serine/arginine-rich splicing factor 4, putative	SRSF4	-0.19	0.22353	0.650663
PBANKA_0206300	centrin-1, putative	CEN1	-0.19	0.558021	0.25335
PBANKA_1359300	VPS13 domain-containing protein, putative	N/A	-0.19	0.584229	0.233417
PBANKA_0827500	glutamine-dependent NAD(+) synthetase, putative	NADSYN	-0.19	0.68185	0.166311
PBANKA_1139900	reticulon-like protein, putative	RTN1	-0.19	0.733586	0.134549
PBANKA_1423600	40S ribosomal protein S16, putative	N/A	-0.19	0.734481	0.13402
PBANKA_0832600	proteasome subunit beta type-6, putative	N/A	-0.19	0.758272	0.120175
PBANKA_0514500	26S proteasome regulatory subunit RPN9, putative	RPN9	-0.19	0.791255	0.101684
PBANKA_1135700	CUGBP Elav-like family member 1, putative	CELF1	-0.19	0.796859	0.0986187
PBANKA_0505100	ADP-ribosylation factor 1, putative	ARF1	-0.19	0.802619	0.0954908
PBANKA_0919900	ATP-dependent 6-phosphofructokinase, putative	PFK11	-0.19	0.8114	0.0907648
PBANKA_0407300	OMD protein	OMD	-0.19	0.847973	0.0716179
PBANKA_1211700	Nicalin domain-containing protein	N/A	-0.19	0.892866	0.0492136
PBANKA_1323000	conserved protein, unknown function	N/A	-0.19	0.91529	0.0384413
PBANKA_1135000	YOP1-like protein, putative	YOP1L	-0.19	0.91804	0.0371385
PBANKA_0923400	60S ribosomal protein L35, putative	RPL35	-0.19	0.930481	0.0312924
PBANKA_0712600	14-3-3 protein	14-3-3I	-0.19	0.934916	0.0292274
PBANKA_0911800	DnaJ protein, putative	N/A	-0.19	0.969224	0.0135757
PBANKA_0109100	transketolase, putative	TK	-0.19	0.985375	0.00639833
PBANKA_0908500	myosin K	MyoK	-0.19	0.999684	0.000137253
PBANKA_1434400	secreted ookinete protein, putative	PSOP17	-0.18	0.443012	0.353585
PBANKA_0704500	HECT-like E3 ubiquitin ligase, putative	HEUL	-0.18	0.53971	0.26784
PBANKA_0939900	U6 snRNA-associated Sm-like protein LSm4, putative	LSM4	-0.18	0.568371	0.245368
PBANKA_1223300	ras-related protein Rab-18, putative	RAB18	-0.18	0.601729	0.220599
PBANKA_1211300	autophagy-related protein 18, putative	ATG18	-0.18	0.669025	0.174558
PBANKA_1452300	conserved protein, unknown function	N/A	-0.18	0.698143	0.156056
PBANKA_0402100	spindle pole body protein, putative	N/A	-0.18	0.74229	0.129427
PBANKA_1421300	phosphoglycolate phosphatase	PGP	-0.18	0.806657	0.0933113
PBANKA_0415000	Maf-like protein, putative	N/A	-0.18	0.887236	0.0519611
PBANKA_0604800	eukaryotic translation initiation factor 3 subunit C, putative	EIF3C	-0.18	0.907352	0.0422244
PBANKA_0828000	gametocyte development protein GD1	GD1	-0.18	0.920752	0.0358574
PBANKA_1426900	ATP-dependent RNA helicase DBP1, putative	DBP1	-0.18	0.93415	0.0295836
PBANKA_1137900	proliferating cell nuclear antigen 1, putative	PCNA1	-0.18	0.93774	0.0279173
PBANKA_1228400	mannose-6-phosphate isomerase, putative	N/A	-0.18	0.955504	0.0197676
PBANKA_1360300	DNA/RNA-binding protein Alba 4, putative	ALBA4	-0.18	0.987885	0.0052936
PBANKA_1210100	DNA repair protein RAD23, putative	RAD23	-0.18	0.999907	4.04e-05
PBANKA_1456800	vacuolar-sorting protein SNF7, putative	SNF7	-0.18	0.999916	3.67e-05
PBANKA_0932200	peptidyl-prolyl cis-trans isomerase, putative	N/A	-0.18	0.999941	2.54e-05
PBANKA_1350600	nuclear movement protein, putative	NUDC	-0.17	0.395825	0.402496
PBANKA_1209100	dolichyl-phosphate-mannose--protein mannosyltransferase, putative	N/A	-0.17	0.435466	0.361045
PBANKA_0610400	non-SERCA-type Ca2+ -transporting P-ATPase, putative	ATP4	-0.17	0.514894	0.288282
PBANKA_1018400	protein arginine N-methyltransferase 1, putative	PRMT1	-0.17	0.578934	0.237371
PBANKA_0806400	PAT complex subunit CCDC47, putative	N/A	-0.17	0.782591	0.106465
PBANKA_0938500	succinate--CoA ligase [ADP-forming] subunit alpha, putative	N/A	-0.17	0.815095	0.0887918
PBANKA_0407600	asparagine synthetase [glutamine-hydrolyzing]	AS	-0.17	0.909871	0.0410202
PBANKA_1202200	U5 small nuclear ribonucleoprotein component, putative	EFTUD2	-0.17	0.918785	0.0367862
PBANKA_0703900	receptor for activated c kinase, putative	RACK1	-0.17	0.959226	0.018079
PBANKA_0520400	dynamin-like protein, putative	DYN2	-0.17	0.984666	0.00671093
PBANKA_1142800	conserved protein, unknown function	N/A	-0.17	0.98752	0.00545402
PBANKA_1137500	actin-depolymerizing factor 2	ADF2	-0.17	0.990738	0.00404123
PBANKA_1019500	60S ribosomal protein L5, putative	N/A	-0.17	0.997024	0.00129421
PBANKA_1305700	vacuolar protein sorting-associated protein 60, putative	VPS60	-0.17	0.999027	0.000422939
PBANKA_0417500	60S ribosomal protein L32, putative	RPL32	-0.17	0.999726	0.0001188
PBANKA_1040100	choline kinase	CK	-0.16	0.377939	0.422579
PBANKA_1401300	40S ribosomal protein S7, putative	N/A	-0.16	0.677016	0.169401
PBANKA_1204800	phosducin-like protein 3	PhLP3	-0.16	0.677788	0.168906
PBANKA_0211500	proteasome subunit alpha type-5, putative	N/A	-0.16	0.690948	0.160555
PBANKA_0306500	ARMT1-like domain-containing protein, putative	N/A	-0.16	0.871282	0.0598411
PBANKA_1232500	eukaryotic translation initiation factor 3 subunit B, putative	EIF3B	-0.16	0.910086	0.0409175
PBANKA_0617900	apoptosis-inducing factor, putative	AIF	-0.16	0.940836	0.0264862
PBANKA_0924800	golgi protein 2	GP2	-0.16	0.944622	0.024742
PBANKA_0306100	6-cysteine protein P230	P230	-0.16	0.960798	0.0173678
PBANKA_0104100	aurora-related kinase ARK1, putative	ARK1	-0.16	0.96238	0.0166534
PBANKA_1003400	amino acid decarboxylase AAD, putative	AAD	-0.16	0.991066	0.00389749
PBANKA_0614500	eukaryotic translation initiation factor 3 subunit I, putative	EIF3I	-0.16	0.999186	0.000353478
PBANKA_0414100	inorganic pyrophosphatase, putative	PPase	-0.16	0.999981	8.47e-06
PBANKA_0906400	60S ribosomal protein L35ae, putative	N/A	-0.15	0.476381	0.322045
PBANKA_1359000	protein transport protein SEC61 subunit alpha, putative	SEC61A	-0.15	0.592564	0.227265
PBANKA_0110400	eukaryotic translation initiation factor 3 subunit L, putative	EIF3L	-0.15	0.639451	0.194193
PBANKA_0810200	conserved Plasmodium protein, unknown function	N/A	-0.15	0.766506	0.115484
PBANKA_1453300	acyl-CoA synthetase, putative	ACS11	-0.15	0.807315	0.0929569
PBANKA_0913000	condensin-2 complex subunit D3, putative	CAPD3	-0.15	0.842531	0.0744144
PBANKA_0801200	erythrocyte membrane-associated antigen, putative	N/A	-0.15	0.86655	0.0622064
PBANKA_1210900	phosphoglucomutase, putative	N/A	-0.15	0.900762	0.04539
PBANKA_0203000	chromatin assembly factor 1 subunit C, putative	CAF1C	-0.15	0.90472	0.043486
PBANKA_0303600	26S proteasome regulatory subunit RPN1, putative	RPN1	-0.15	0.908203	0.0418173
PBANKA_1013000	inner membrane complex suture component, putative	ISC3	-0.15	0.927779	0.0325554
PBANKA_1306200	tRNA import protein tRIP	tRIP	-0.15	0.943683	0.0251738
PBANKA_0836300	cytoadherence linked asexual protein 9	CLAG9	-0.15	0.948967	0.0227489
PBANKA_0936500	replication factor C subunit 5, putative	RFC5	-0.15	0.954266	0.0203303
PBANKA_1219300	heat shock protein 110, putative	HSP110c	-0.15	0.958754	0.0182929
PBANKA_1451500	conserved Plasmodium protein, unknown function	N/A	-0.15	0.975591	0.0107324
PBANKA_1349400	DNA replication complex GINS protein, putative	N/A	-0.15	0.986594	0.00586136
PBANKA_1364200	60S ribosomal protein L17, putative	N/A	-0.15	0.986736	0.00579889
PBANKA_1437400	diphthine--ammonia ligase, putative	DPH6	-0.15	0.996238	0.00163679
PBANKA_0818900	endoplasmic reticulum chaperone BiP, putative	BIP	-0.15	0.999514	0.000211331
PBANKA_1431050	10 kDa chaperonin, putative	CPN10	-0.14	0.344303	0.463059
PBANKA_0210100	vacuolar protein sorting-associated protein VTA1, putative	N/A	-0.14	0.601122	0.221037
PBANKA_1239900	acyl-CoA synthetase, putative	ACS10	-0.14	0.781294	0.107186
PBANKA_0712900	high mobility group protein B2	HMGB2	-0.14	0.789541	0.102625
PBANKA_0100900	ATP-dependent RNA helicase MTR4, putative	MTR4	-0.14	0.796537	0.0987941
PBANKA_0938300	heat shock protein HspJ62	HSPJ62	-0.14	0.797923	0.098039
PBANKA_1351900	60S ribosomal protein L6, putative	RPL6	-0.14	0.857441	0.0667957
PBANKA_1359600	6-cysteine protein P48/45	P48/45	-0.14	0.879763	0.0556343
PBANKA_1448900	DNA polymerase epsilon subunit B, putative	N/A	-0.14	0.893263	0.0490205
PBANKA_1434700	clathrin heavy chain, putative	CHC	-0.14	0.895816	0.0477813
PBANKA_1039600	26S proteasome regulatory subunit RPN6, putative	RPN6	-0.14	0.915828	0.038186
PBANKA_1406700	carbamoyl phosphate synthetase, putative	CPSII	-0.14	0.919903	0.0362579
PBANKA_1124800	conserved Plasmodium protein, unknown function	N/A	-0.14	0.924977	0.0338689
PBANKA_1228200	glutamate dehydrogenase, putative	GDH3	-0.14	0.929688	0.0316626
PBANKA_0107300	T-complex protein 1 subunit zeta, putative	CCT6	-0.14	0.936414	0.0285322
PBANKA_1107300	nuclear protein localization protein 4, putative	NPL4	-0.14	0.937469	0.028043
PBANKA_0820300	protein disulfide-isomerase PDI-Trans	PDI-Trans	-0.14	0.960146	0.0176628
PBANKA_1441400	proliferating cell nuclear antigen 2	PCNA2	-0.14	0.96964	0.0133893
PBANKA_1409900	AP-1 complex subunit mu-1, putative	AP1M1	-0.14	0.973711	0.0115697
PBANKA_1413200	pinin/SDK/MemA domain-containing protein, putative	N/A	-0.14	0.998193	0.00078538
PBANKA_1447000	cytochrome b5, putative	N/A	-0.14	0.99936	0.00027787
PBANKA_0610800	eukaryotic translation initiation factor eIF2A, putative	N/A	-0.13	0.279841	0.553088
PBANKA_1331900	eukaryotic initiation factor 4a, putative	eIF4A	-0.13	0.448343	0.348389
PBANKA_1445100	ATP-dependent protease subunit ClpQ, putative	ClpQ	-0.13	0.561909	0.250334
PBANKA_1138300	transmembrane and coiled-coil domain-containing protein 1, putative	TMCO1	-0.13	0.618896	0.208383
PBANKA_1347600	eukaryotic translation initiation factor 6, putative	N/A	-0.13	0.704134	0.152344
PBANKA_0213200	apicomplexan kinetochore protein 8	AKIT8	-0.13	0.733284	0.134728
PBANKA_1337100	splicing factor 1, putative	SF1	-0.13	0.734663	0.133912
PBANKA_1362000	glutamate--tRNA ligase, putative	GluRS	-0.13	0.840061	0.0756894
PBANKA_1326000	GTP-binding protein, putative	N/A	-0.13	0.861426	0.0647822
PBANKA_1433500	PPPDE peptidase domain-containing protein, putative	N/A	-0.13	0.884259	0.0534203
PBANKA_1125600	pyruvate kinase, putative	N/A	-0.13	0.88521	0.0529536
PBANKA_0308600	asparagine--tRNA ligase, putative	N/A	-0.13	0.89968	0.0459118
PBANKA_0507100	cytochrome c oxidase subunit ApiCOX13, putative	N/A	-0.13	0.900329	0.0455989
PBANKA_1320500	V-type H(+)-translocating pyrophosphatase, putative	VP1	-0.13	0.920211	0.0361127
PBANKA_1118600	cell division cycle protein 48 homologue, putative	N/A	-0.13	0.948348	0.0230324
PBANKA_1403800	translational activator GCN1, putative	GCN1	-0.13	0.952722	0.021034
PBANKA_0921300	deoxyuridine 5'-triphosphate nucleotidohydrolase, putative	N/A	-0.13	0.957906	0.0186773
PBANKA_0813400	alkaline phosphatase, putative	N/A	-0.13	0.963759	0.0160316
PBANKA_1406500	conserved Plasmodium protein, unknown function	N/A	-0.13	0.99951	0.000212697
PBANKA_0401400	RNA-binding protein, putative	N/A	-0.13	0.999523	0.000207317
PBANKA_1109000	RNA polymerase I, putative	N/A	-0.12	0.290223	0.537268
PBANKA_0806100	CCR4 domain-containing protein 4, putative	CCR4-4	-0.12	0.514559	0.288565
PBANKA_1339900	SNARE protein, putative	N/A	-0.12	0.708623	0.149585
PBANKA_0715500	phosphoglucomutase-2	PGM2	-0.12	0.751058	0.124326
PBANKA_1364300	glycerol kinase, putative	N/A	-0.12	0.852301	0.069407
PBANKA_0621600	conserved Plasmodium protein, unknown function	N/A	-0.12	0.901755	0.0449113
PBANKA_0405400	40S ribosomal protein S12, putative	RPS12	-0.12	0.941712	0.026082
PBANKA_1428700	eukaryotic translation initiation factor 3 subunit A, putative	EIF3A	-0.12	0.955841	0.0196141
PBANKA_1039700	cytochrome c oxidase subunit ApiCOX19, putative	N/A	-0.12	0.974868	0.0110542
PBANKA_1137200	protein transport protein Sec24A, putative	SEC24A	-0.12	0.985099	0.00652
PBANKA_0931100	conserved protein, unknown function	N/A	-0.12	0.994289	0.00248726
PBANKA_1142400	nucleoside diphosphate kinase b, putative	N/A	-0.12	0.99991	3.89e-05
PBANKA_1459900	signal recognition particle receptor subunit beta, putative	SRPRB	-0.11	0.520486	0.283591
PBANKA_1463200	vacuolar protein sorting-associated protein 26, putative	VPS26	-0.11	0.668396	0.174966
PBANKA_0940900	RuvB-like helicase 2, putative	RUVB2	-0.11	0.720502	0.142365
PBANKA_0507400	orotidine 5'-phosphate decarboxylase, putative	OMPDC	-0.11	0.775926	0.11018
PBANKA_0919300	spermidine synthase, putative	SPDS	-0.11	0.786767	0.104154
PBANKA_1014600	serine/threonine protein phosphatase 2A activator, putative	PTPA	-0.11	0.814434	0.0891442
PBANKA_0911400	CLPTM1 domain-containing protein, putative	N/A	-0.11	0.821543	0.0853696
PBANKA_0912300	tudor staphylococcal nuclease, putative	TSN	-0.11	0.832143	0.0798018
PBANKA_1127000	choline/ethanolaminephosphotransferase	CEPT	-0.11	0.839711	0.07587
PBANKA_1439400	histone chaperone ASF1, putative	ASF1	-0.11	0.857741	0.066644
PBANKA_1003100	pre-mRNA-processing-splicing factor 8, putative	PRPF8	-0.11	0.866208	0.0623777
PBANKA_1217000	peptidase, putative	N/A	-0.11	0.866941	0.0620106
PBANKA_1208700	succinate dehydrogenase subunit 4, putative	SDH4	-0.11	0.86941	0.0607754
PBANKA_0613200	DNA polymerase alpha catalytic subunit A, putative	N/A	-0.11	0.888194	0.0514924
PBANKA_0912100	casein kinase 1, putative	CK1	-0.11	0.903095	0.0442664
PBANKA_1026300	conserved protein, unknown function	N/A	-0.11	0.911215	0.0403789
PBANKA_0503600	60S ribosomal protein L30e, putative	N/A	-0.11	0.924882	0.0339136
PBANKA_0105600	translation initiation factor IF-2, putative	N/A	-0.11	0.947195	0.0235604
PBANKA_1444100	T-complex protein 1 subunit gamma, putative	CCT3	-0.11	0.960529	0.0174893
PBANKA_0912200	signal recognition particle subunit SRP72, putative	SRP72	-0.11	0.977052	0.0100825
PBANKA_1008800	glucose-6-phosphate isomerase, putative	N/A	-0.11	0.983141	0.00738404
PBANKA_1202100	MKT1 domain-containing protein, putative	N/A	-0.11	0.985947	0.00614634
PBANKA_1104800	actin-like protein, putative	ALP2b	-0.11	0.997567	0.00105808
PBANKA_0929100	acyl-CoA-binding protein, putative	N/A	-0.11	0.998916	0.000471101
PBANKA_1456900	translation initiation factor SUI1, putative	N/A	-0.11	0.999448	0.000239812
PBANKA_0715200	eukaryotic translation initiation factor 3 subunit G, putative	EIF3G	-0.11	0.99999	4.56e-06
PBANKA_1344300	chromatin assembly factor 1 subunit B, putative	CAF1B	-0.11	0.999996	1.63e-06
PBANKA_0404200	ubiquitin-conjugating enzyme MMS2, putative	N/A	-0.1	0.527518	0.277763
PBANKA_0405300	40S ribosomal protein S23, putative	N/A	-0.1	0.74345	0.128748
PBANKA_1009300	clathrin light chain, putative	CLC	-0.1	0.841643	0.0748719
PBANKA_0211300	cysteine desulfurase IscS, putative	NFS1	-0.1	0.872421	0.0592741
PBANKA_0711300	conserved protein, unknown function	N/A	-0.1	0.89527	0.0480457
PBANKA_1217700	ATP-dependent RNA helicase DDX6	DOZI	-0.1	0.898254	0.0466006
PBANKA_0601100	mitochondrial phosphate carrier protein, putative	PIC	-0.1	0.931614	0.0307641
PBANKA_1030000	deoxyhypusine synthase	DHS	-0.1	0.935661	0.0288814
PBANKA_0920800	CRAL/TRIO domain-containing protein, putative	N/A	-0.1	0.946476	0.0238906
PBANKA_0913600	conserved Plasmodium protein, unknown function	N/A	-0.1	0.959239	0.0180731
PBANKA_1221200	60S ribosomal protein L34, putative	RPL34	-0.1	0.974923	0.0110296
PBANKA_0205200	conserved Plasmodium protein, unknown function	N/A	-0.1	0.976491	0.0103319
PBANKA_0414800	arginase	N/A	-0.1	0.982033	0.00787377
PBANKA_0930900	ubiquitin carboxyl-terminal hydrolase UCH54, putative	UCH54	-0.1	0.982291	0.00775978
PBANKA_1333800	RAP protein RAP21, putative	N/A	-0.1	0.998053	0.000846285
PBANKA_1459300	actin I	ACT1	-0.1	0.99997	1.3e-05
PBANKA_0513600	adenosine deaminase, putative	ADA	-0.1	1	1.16e-07
PBANKA_0804000	60S ribosomal protein L37, putative	RPL37	-0.09	0.625298	0.203913
PBANKA_1014900	coatomer subunit beta, putative	N/A	-0.09	0.69687	0.156848
PBANKA_0831800	elongation factor Tu, putative	N/A	-0.09	0.809974	0.091529
PBANKA_1303700	vesicle-associated membrane protein, putative	N/A	-0.09	0.870836	0.0600638
PBANKA_1337500	protein STU2, putative	STU2	-0.09	0.890767	0.0502357
PBANKA_1308200	1-acyl-sn-glycerol-3-phosphate acyltransferase, putative	LPAAT	-0.09	0.894795	0.0482765
PBANKA_1323300	pyridoxal 5'-phosphate synthase, putative	N/A	-0.09	0.911799	0.0401007
PBANKA_1230200	cdc2-related protein kinase 5	CRK5	-0.09	0.926369	0.0332158
PBANKA_1029800	glycylpeptide N-tetradecanoyltransferase, putative	NMT	-0.09	0.926876	0.0329784
PBANKA_1462700	THO complex subunit 2, putative	THO2	-0.09	0.949157	0.022662
PBANKA_1316400	U1 snRNP-associated protein, putative	N/A	-0.09	0.949549	0.0224828
PBANKA_1352000	elongation factor 1-gamma, putative	EF-1gamma	-0.09	0.977508	0.00987985
PBANKA_1028400	60S ribosomal protein L10, putative	N/A	-0.09	0.978019	0.00965287
PBANKA_1302800	thioredoxin peroxidase 1	TPx1	-0.09	0.981031	0.00831742
PBANKA_0618900	rhoptry protein, putative	N/A	-0.09	0.984939	0.00659048
PBANKA_1363900	CXXC motif containing zinc binding protein, putative	N/A	-0.09	0.987965	0.00525844
PBANKA_1218500	protein phosphatase inhibitor 2, putative	N/A	-0.09	0.989578	0.00455
PBANKA_0105500	glutaredoxin-like protein	GLP2	-0.09	0.995685	0.00187819
PBANKA_0702800	protein disulfide-isomerase, putative	N/A	-0.09	0.996697	0.00143665
PBANKA_0411700	HSP20-like chaperone, putative	N/A	-0.09	0.998038	0.000852971
PBANKA_1443900	PhIL1-interacting candidate PIC1, putative	N/A	-0.09	0.999265	0.000319162
PBANKA_1441100	haloacid dehalogenase-like hydrolase, putative	HAD2	-0.09	0.999678	0.000140017
PBANKA_0401500	exportin-1, putative	N/A	-0.08	0.499123	0.301792
PBANKA_1315300	LCCL domain-containing protein	LAP5	-0.08	0.734974	0.133728
PBANKA_1417300	translocation protein SEC63, putative	SEC63	-0.08	0.74378	0.128556
PBANKA_0601600	nuclear export mediator factor NEMF, putative	NEMF	-0.08	0.772858	0.1119
PBANKA_1306800	Sec7 domain-containing protein ARFGEF, putative	ARFGEF	-0.08	0.788154	0.103389
PBANKA_0505600	endomembrane protein 70, putative	N/A	-0.08	0.80197	0.0958418
PBANKA_1031900	eukaryotic translation initiation factor 2 subunit gamma, putative	eIF2gamma	-0.08	0.820762	0.0857825
PBANKA_0805500	conserved Plasmodium protein, unknown function	N/A	-0.08	0.829148	0.0813677
PBANKA_0706700	dicarboxylate/tricarboxylate carrier, putative	DTC	-0.08	0.83931	0.0760775
PBANKA_1144100	ABC transporter E family member 1, putative	ABCE1	-0.08	0.857086	0.0669757
PBANKA_1445800	ras-related protein Rab-2, putative	RAB2	-0.08	0.860915	0.0650397
PBANKA_0605600	conserved Plasmodium protein, unknown function	N/A	-0.08	0.882759	0.054158
PBANKA_1139400	polyubiquitin binding protein, putative	DOA1	-0.08	0.891351	0.0499511
PBANKA_1219500	chloroquine resistance transporter, putative	CRT	-0.08	0.892533	0.0493756
PBANKA_1013200	succinate--CoA ligase [ADP-forming] subunit beta, putative	N/A	-0.08	0.899911	0.0458004
PBANKA_1428500	glycerol-3-phosphate 1-O-acyltransferase, putative	N/A	-0.08	0.926281	0.0332573
PBANKA_1030300	nuclear transport factor 2, putative	NTF2	-0.08	0.952584	0.0210969
PBANKA_0903900	coatomer subunit gamma, putative	SEC21	-0.08	0.960506	0.0175001
PBANKA_0404800	FAD-dependent glycerol-3-phosphate dehydrogenase, putative	N/A	-0.08	0.962797	0.0164654
PBANKA_0820000	DnaJ protein, putative	N/A	-0.08	0.976559	0.0103014
PBANKA_1427700	RuvB-like helicase 1, putative	RUVB1	-0.08	0.97794	0.00968801
PBANKA_1022300	mannose-1-phosphate guanyltransferase, putative	N/A	-0.08	0.985268	0.00644583
PBANKA_1037300	conserved Plasmodium protein, unknown function	N/A	-0.08	0.986389	0.00595182
PBANKA_0905000	40S ribosomal protein S21, putative	RPS21	-0.08	0.987698	0.00537582
PBANKA_0803400	40S ribosomal protein S29, putative	N/A	-0.08	0.988284	0.00511823
PBANKA_1035200	LCCL domain-containing protein	CCp3	-0.08	0.988756	0.0049107
PBANKA_0214000	dynein heavy chain, putative	DHC3	-0.08	0.989907	0.00440558
PBANKA_0409300	phosphatidylinositol 3- and 4-kinase, putative	N/A	-0.08	0.990185	0.00428366
PBANKA_1428800	succinate dehydrogenase [ubiquinone] iron-sulfur subunit, mitochondrial, putative	SDHB	-0.08	0.990832	0.00400002
PBANKA_0407400	aurora-related kinase ARK2	ARK2	-0.08	0.993347	0.00289887
PBANKA_1300700	LCCL domain-containing protein	CCp1	-0.08	0.996036	0.00172505
PBANKA_0833600	importin alpha re-exporter, putative	CSE1	-0.08	0.997021	0.00129574
PBANKA_1310200	nucleoporin NUP313	NUP313	-0.08	0.997761	0.000973653
PBANKA_0910800	conserved Plasmodium protein, unknown function	N/A	-0.08	0.999847	6.65e-05
PBANKA_1405100	V-type proton ATPase subunit H, putative	N/A	-0.08	0.999904	4.17e-05
PBANKA_1120800	signal recognition particle subunit SRP68, putative	SRP68	-0.07	0.599783	0.222006
PBANKA_1345000	PITH domain-containing protein, putative	N/A	-0.07	0.601828	0.220528
PBANKA_0523100	eukaryotic initiation factor 4A-III, putative	EIF4A3	-0.07	0.660993	0.179803
PBANKA_1358200	cytochrome c oxidase subunit ApiCOX16, putative	N/A	-0.07	0.673289	0.171798
PBANKA_0921500	small nuclear ribonucleoprotein F, putative	SNRPF	-0.07	0.885528	0.0527976
PBANKA_1361500	WD repeat-containing protein 16, putative	WDR16	-0.07	0.920045	0.0361911
PBANKA_1226800	DNA repair and recombination protein RAD54, putative	RAD54	-0.07	0.923066	0.0347672
PBANKA_1222800	tyrosine--tRNA ligase, putative	TyrRS	-0.07	0.931137	0.0309865
PBANKA_0708000	protein transport protein SEC23, putative	SEC23	-0.07	0.943757	0.0251399
PBANKA_1231500	ubiquitin carboxyl-terminal hydrolase 2, putative	N/A	-0.07	0.981857	0.00795187
PBANKA_0210200	aspartate--tRNA ligase, putative	N/A	-0.07	0.983527	0.00721384
PBANKA_1301300	trailer hitch homolog	CITH	-0.07	0.983616	0.00717455
PBANKA_1129100	DNA polymerase epsilon catalytic subunit A, putative	N/A	-0.07	0.986618	0.00585076
PBANKA_1209000	eukaryotic translation initiation factor 2 subunit beta, putative	eIF2beta	-0.07	0.996377	0.00157629
PBANKA_1208800	MORN repeat protein, putative	N/A	-0.07	0.996976	0.00131537
PBANKA_1305000	conserved Plasmodium protein, unknown function	N/A	-0.07	0.997052	0.00128218
PBANKA_1117400	conserved protein, unknown function	N/A	-0.07	0.997351	0.00115196
PBANKA_0908800	conserved Plasmodium protein, unknown function	N/A	-0.07	0.997755	0.000976147
PBANKA_1140600	DNA-directed RNA polymerases I, II, and III subunit RPABC1, putative	RPB5	-0.07	0.998357	0.000713951
PBANKA_1458800	kinesin-15	N/A	-0.07	0.998653	0.000585406
PBANKA_0208100	heptatricopeptide repeat and RAP domain-containing protein, putative	N/A	-0.07	0.999112	0.000385645
PBANKA_0823000	ubiquitin-like protein, putative	N/A	-0.07	0.999292	0.000307474
PBANKA_0822900	dynein intermediate chain, putative	N/A	-0.07	0.999612	0.000168612
PBANKA_0406000	apicomplexan kinetochore protein 10	AKIT10	-0.07	0.999646	0.000153557
PBANKA_0704100	ubiquitin conjugation factor E4 B, putative	UBE4B	-0.07	0.999683	0.000137825
PBANKA_0402000	palmitoyltransferase DHHC1, putative	DHHC1	-0.06	0.338646	0.470255
PBANKA_1429700	W2 domain-containing protein, putative	N/A	-0.06	0.647882	0.188504
PBANKA_0520900	antigen UB05, putative	N/A	-0.06	0.673037	0.171961
PBANKA_0922800	small nuclear ribonucleoprotein Sm D1, putative	SNRPD1	-0.06	0.759124	0.119687
PBANKA_0212100	eukaryotic translation initiation factor 2 subunit alpha	eIF2alpha	-0.06	0.765447	0.116085
PBANKA_0934300	UDP-galactose transporter, putative	UGT	-0.06	0.853941	0.0685719
PBANKA_1334100	proteasome subunit beta type-2, putative	N/A	-0.06	0.914396	0.0388655
PBANKA_1341900	ubiquitin-activating enzyme, putative	N/A	-0.06	0.918186	0.0370691
PBANKA_0103900	KH domain-containing protein, putative	N/A	-0.06	0.918769	0.0367939
PBANKA_0518200	flavoprotein subunit of succinate dehydrogenase, putative	SDHA	-0.06	0.925322	0.0337073
PBANKA_1452000	hydrolase, putative	N/A	-0.06	0.942402	0.0257639
PBANKA_1121700	leucine--tRNA ligase, putative	N/A	-0.06	0.951012	0.0218139
PBANKA_1410400	V-type proton ATPase catalytic subunit A, putative	N/A	-0.06	0.957028	0.0190755
PBANKA_1030400	MORN repeat protein, putative	MORN (1030400)	-0.06	0.960945	0.0173013
PBANKA_0404400	cytochrome b-c1 complex subunit 8, putative	QCR8	-0.06	0.962162	0.0167518
PBANKA_0103300	GYF domain-containing protein, putative	N/A	-0.06	0.971656	0.0124873
PBANKA_1317500	glucose-6-phosphate dehydrogenase-6-phosphogluconolactonase, putative	GluPho	-0.06	0.97401	0.0114366
PBANKA_0706400	conserved Plasmodium protein, unknown function	N/A	-0.06	0.977229	0.0100038
PBANKA_1420300	conserved Plasmodium protein, unknown function	N/A	-0.06	0.97958	0.0089601
PBANKA_1355000	V-type proton ATPase subunit D, putative	N/A	-0.06	0.984358	0.00684694
PBANKA_0807500	conserved Plasmodium protein, unknown function	N/A	-0.06	0.984989	0.00656853
PBANKA_0620800	conserved protein, unknown function	N/A	-0.06	0.987126	0.00562736
PBANKA_0924300	endoplasmic reticulum oxidoreductin, putative	ERO1	-0.06	0.988097	0.00520039
PBANKA_1305300	FACT complex subunit SSRP1, putative	FACT-S	-0.06	0.991188	0.00384397
PBANKA_1442300	kinetochore protein SPC24, putative	SPC24	-0.06	0.991752	0.00359679
PBANKA_1409000	ER membrane protein complex subunit 7, putative	EMC7	-0.06	0.992867	0.00310896
PBANKA_1222100	regulator of chromosome condensation, putative	N/A	-0.06	0.993779	0.00271021
PBANKA_0401100	serine/threonine protein kinase, putative	SRPK1	-0.06	0.994173	0.00253789
PBANKA_1238200	DnaJ protein, putative	N/A	-0.06	0.998865	0.000493257
PBANKA_1220300	prodrug activation and resistance esterase, putative	PARE	-0.06	0.999767	0.000101329
PBANKA_1130800	phosphoinositide phosphatase SAC1, putative	SAC1	-0.06	0.999832	7.3e-05
PBANKA_1302200	translocation protein SEC62, putative	N/A	-0.06	0.999962	1.64e-05
PBANKA_1242000	ubiquitin carboxyl-terminal hydrolase 14, putative	USP14	-0.06	0.99998	8.77e-06
PBANKA_0833000	profilin	PFN	-0.06	0.999985	6.41e-06
PBANKA_1415600	DNA replication licensing factor MCM4, putative	MCM4	-0.06	0.999999	2.19e-07
PBANKA_0808900	ATP-dependent protease ATPase subunit ClpY, putative	ClpY	-0.05	0.802531	0.095538
PBANKA_0105400	coatomer alpha subunit, putative	N/A	-0.05	0.839819	0.0758144
PBANKA_0520200	ADP,ATP carrier protein 1, putative	AAC1	-0.05	0.858625	0.0661966
PBANKA_0834300	gamma-tubulin complex component, putative	N/A	-0.05	0.910486	0.0407265
PBANKA_0412800	eukaryotic translation initiation factor 4E, putative	eIF4E	-0.05	0.916251	0.0379854
PBANKA_1237900	mitochondrial-processing peptidase subunit alpha, putative	QCR2	-0.05	0.927233	0.0328112
PBANKA_0207200	V-type proton ATPase subunit C, putative	N/A	-0.05	0.931492	0.0308207
PBANKA_1210200	PRE-binding protein, putative	PREBP	-0.05	0.937205	0.0281656
PBANKA_0714800	ribosome assembly protein RRB1, putative	RRB1	-0.05	0.942505	0.0257165
PBANKA_0707400	RNA-binding protein, putative	N/A	-0.05	0.956928	0.0191206
PBANKA_0303300	conserved Plasmodium protein, unknown function	N/A	-0.05	0.970467	0.0130191
PBANKA_0309100	eukaryotic peptide chain release factor subunit 1, putative	ERF1	-0.05	0.976353	0.0103931
PBANKA_0612200	apicomplexan kinetochore protein 3	AKIT3	-0.05	0.97891	0.00925705
PBANKA_0914300	protein disulfide-isomerase, putative	N/A	-0.05	0.983489	0.00723028
PBANKA_1130500	proteasome subunit alpha type-7, putative	N/A	-0.05	0.988444	0.00504777
PBANKA_0806700	conserved Plasmodium protein, unknown function	PI3K/PI4K	-0.05	0.989641	0.0045225
PBANKA_0708100	dynein light chain 1	DLC1	-0.05	0.990104	0.00431919
PBANKA_0817700	RNA-binding protein musashi, putative	HoMu	-0.05	0.99072	0.00404898
PBANKA_1426500	cullin-1	CUL1	-0.05	0.995183	0.00209685
PBANKA_0811300	exportin-7, putative	N/A	-0.05	0.995656	0.00189088
PBANKA_0804600	ATPase family AAA domain-containing protein 3A, putative	N/A	-0.05	0.997615	0.00103706
PBANKA_1456200	rab specific GDP dissociation inhibitor, putative	rabGDI	-0.05	0.997943	0.00089405
PBANKA_1341100	respiratory chain complex 3 associated protein 2, putative	N/A	-0.05	0.998671	0.00057773
PBANKA_0929600	nucleolar protein 56, putative	NOP56	-0.05	0.999281	0.000312391
PBANKA_0311000	protein transport protein SEC31, putative	SEC31	-0.05	0.999785	9.32e-05
PBANKA_1200800	transformer-2 protein homolog beta, putative	TRA2B	-0.05	0.999919	3.51e-05
PBANKA_1336300	GTPase-activating protein, putative	N/A	-0.05	0.999971	1.25e-05
PBANKA_1101600	chromatin assembly factor 1 subunit A, putative	CAF1A	-0.05	0.999999	4.73e-07
PBANKA_1406600	CCAAT-binding transcription factor, putative	N/A	-0.05	1	4.95e-08
PBANKA_1320900	thioredoxin 1, putative	TRX1	-0.04	0.619267	0.208122
PBANKA_1426300	ER membrane protein complex subunit 1, putative	EMC1	-0.04	0.708872	0.149432
PBANKA_0207000	calcium-transporting ATPase, putative	SERCA	-0.04	0.836149	0.0777163
PBANKA_0418000	ATP-dependent RNA helicase DDX60, putative	DDX60	-0.04	0.906675	0.0425486
PBANKA_0506700	citrate synthase, mitochondrial, putative	CS	-0.04	0.913714	0.0391897
PBANKA_1358600	isocitrate dehydrogenase [NADP], mitochondrial, putative	IDH	-0.04	0.915619	0.0382851
PBANKA_1416300	40S ribosomal protein S19, putative	RPS19	-0.04	0.933428	0.0299193
PBANKA_1331300	WD repeat-containing protein, putative	N/A	-0.04	0.93783	0.0278758
PBANKA_1357200	endoplasmic reticulum chaperone GRP170, putative	GRP170	-0.04	0.941891	0.0259994
PBANKA_0314600	thioesterase/thiol ester dehydrase-isomerase, putative	N/A	-0.04	0.943727	0.0251536
PBANKA_0713900	adenylate kinase 2, putative	AK2	-0.04	0.955031	0.0199825
PBANKA_1111800	glutathione synthetase	GS	-0.04	0.95678	0.0191881
PBANKA_1116500	mitochondrial import receptor subunit TOM40, putative	TOM40	-0.04	0.957009	0.0190841
PBANKA_1429500	DNA-directed RNA polymerases I, II, and III subunit RPABC3, putative	RPB8	-0.04	0.95904	0.0181633
PBANKA_1429300	integral membrane protein GPR180	GPR180	-0.04	0.96047	0.0175161
PBANKA_1123800	GAS8-like protein, putative	N/A	-0.04	0.969625	0.0133962
PBANKA_0617000	cell division control protein CDC50A, putative	CDC50A	-0.04	0.969764	0.0133341
PBANKA_0108700	RNA-binding protein 25, putative	RBM25	-0.04	0.974496	0.0112198
PBANKA_1023000	myosin-specific chaperone UNC, putative	UNC	-0.04	0.978786	0.00931231
PBANKA_1326900	DNA polymerase alpha subunit B, putative	N/A	-0.04	0.985338	0.00641474
PBANKA_0941100	conserved Apicomplexan protein, unknown function	N/A	-0.04	0.985385	0.00639393
PBANKA_0830900	leucine-rich repeat protein	LRR8	-0.04	0.988061	0.00521608
PBANKA_0619300	conserved Plasmodium protein, unknown function	N/A	-0.04	0.993927	0.00264548
PBANKA_1434100	dynamin-like protein, putative	DRPC	-0.04	0.997412	0.00112561
PBANKA_1337400	nucleoside-diphosphatase, putative	N/A	-0.04	0.997438	0.00111418
PBANKA_0505800	deoxyribose-phosphate aldolase, putative	DPA	-0.04	0.998517	0.000644549
PBANKA_1025200	H/ACA ribonucleoprotein complex subunit 4, putative	CBF5	-0.04	0.998728	0.000552842
PBANKA_0603200	eukaryotic translation initiation factor 5A, putative	EIF5A	-0.04	0.99881	0.000517161
PBANKA_1343300	proteasome subunit beta type-7, putative	N/A	-0.04	0.998961	0.000451358
PBANKA_0939700	vacuolar fusion protein CCZ1, putative	N/A	-0.04	0.999027	0.000422789
PBANKA_0613500	conserved Plasmodium protein, unknown function	N/A	-0.04	0.999639	0.000156886
PBANKA_1414400	exportin-T, putative	N/A	-0.04	0.999687	0.000135877
PBANKA_1431100	conserved Plasmodium protein, unknown function	N/A	-0.04	1	1.25e-07
PBANKA_0706800	DnaJ protein, putative	N/A	-0.03	0.808721	0.092201
PBANKA_0418200	ras-related protein RAB7, putative	RAB7	-0.03	0.81036	0.0913219
PBANKA_1332100	zinc finger protein, putative	N/A	-0.03	0.904009	0.0438273
PBANKA_0415500	coatomer subunit beta, putative	SEC27	-0.03	0.919016	0.036677
PBANKA_0607800	cytosolic iron-sulfur protein assembly protein 1, putative	CIA1	-0.03	0.951058	0.021793
PBANKA_1009500	glutamate synthase [NADH], putative	N/A	-0.03	0.952023	0.0213526
PBANKA_1033100	conserved protein, unknown function	N/A	-0.03	0.952187	0.0212779
PBANKA_0307800	conserved Plasmodium protein, unknown function	N/A	-0.03	0.955037	0.0199798
PBANKA_0605400	conserved Plasmodium protein, unknown function	N/A	-0.03	0.960579	0.017467
PBANKA_1213600	cysteine--tRNA ligase, putative	CysRS	-0.03	0.964466	0.0157132
PBANKA_1207200	adenylate kinase, putative	AK1	-0.03	0.967334	0.0144236
PBANKA_1329200	dynein beta chain, putative	N/A	-0.03	0.976123	0.0104955
PBANKA_1111400	inositol-3-phosphate synthase, putative	INO1	-0.03	0.983678	0.00714726
PBANKA_1205900	AP2 domain transcription factor AP2-I, putative	ApiAP2	-0.03	0.988188	0.00516045
PBANKA_1411300	eukaryotic translation initation factor 4 gamma, putative	EIF4G	-0.03	0.991935	0.00351672
PBANKA_1331600	leucine-rich repeat protein	LRR14.1	-0.03	0.992143	0.00342575
PBANKA_1234500	FoP domain-containing protein, putative	N/A	-0.03	0.992453	0.00329
PBANKA_1109600	conserved Plasmodium protein, unknown function	N/A	-0.03	0.993048	0.00302981
PBANKA_0720200	protein SOC1	SOC1	-0.03	0.993746	0.00272442
PBANKA_1115200	gamete egress protein GEP	GEP	-0.03	0.994891	0.00222445
PBANKA_1242300	Hsc70-interacting protein, putative	HIP	-0.03	0.997495	0.00108939
PBANKA_0510200	conserved Plasmodium protein, unknown function	N/A	-0.03	0.999908	4.01e-05
PBANKA_1036000	transcription elongation factor SPT6, putative	SPT6	-0.02	0.795542	0.0993368
PBANKA_1419100	dihydrolipoyllysine-residue succinyltransferase component of 2-oxoglutarate dehydrogenase complex, putative	N/A	-0.02	0.914961	0.0385974
PBANKA_0410400	glycogen synthase kinase-3 beta, putative	GSK3beta	-0.02	0.952139	0.0212998
PBANKA_1232200	FACT complex subunit SPT16	FACT-L	-0.02	0.953006	0.0209044
PBANKA_1017900	phosphoenolpyruvate carboxylase	PEPC	-0.02	0.953752	0.0205643
PBANKA_1126200	protein DJ-1, putative	DJ1	-0.02	0.96489	0.0155221
PBANKA_1438000	cAMP-dependent protein kinase regulatory subunit, putative	PKAr	-0.02	0.965846	0.015092
PBANKA_1105100	DNA mismatch repair protein MSH6, putative	MSH6	-0.02	0.969755	0.0133381
PBANKA_0610900	HSP40, subfamily A, putative	HSP40	-0.02	0.97214	0.0122712
PBANKA_1145500	nuclear cap-binding protein subunit 1, putative	N/A	-0.02	0.975292	0.0108654
PBANKA_0109600	ATP synthase-associated protein, putative	N/A	-0.02	0.976215	0.0104544
PBANKA_1033200	DNA damage-inducible protein 1, putative	DDI1	-0.02	0.979724	0.00889611
PBANKA_1420700	MAATS1 domain-containing protein, putative	N/A	-0.02	0.987318	0.00554305
PBANKA_1126400	transportin, putative	N/A	-0.02	0.990171	0.00428991
PBANKA_0803000	origin recognition complex subunit 2, putative	ORC2	-0.02	0.990853	0.00399064
PBANKA_1322400	exonuclease V, mitochondrial, putative	N/A	-0.02	0.993139	0.00298986
PBANKA_1410000	26S protease regulatory subunit 7, putative	RPT1	-0.02	0.993321	0.00291031
PBANKA_0939600	polyadenylate-binding protein-interacting protein 1, putative	PAIP1	-0.02	0.994295	0.0024848
PBANKA_1346600	glutamine--tRNA ligase, putative	N/A	-0.02	0.99452	0.00238655
PBANKA_1431400	conserved Plasmodium protein, unknown function	N/A	-0.02	0.997421	0.00112166
PBANKA_0622000	conserved Plasmodium protein, unknown function	N/A	-0.02	0.997467	0.00110137
PBANKA_0917500	structural maintenance of chromosomes protein 1, putative	SMC1	-0.02	0.997793	0.000959341
PBANKA_1138200	RuvB-like helicase 3, putative	RUVB3	-0.02	0.998484	0.0006591
PBANKA_0506900	phospholipid scramblase, putative	PLSCR	-0.02	0.998997	0.000435963
PBANKA_1439200	polyadenylate-binding protein 1, putative	PABP1	-0.02	0.999357	0.000279535
PBANKA_1443000	NIMA related kinase 1, putative	NEK1	-0.02	0.999429	0.000248214
PBANKA_0401800	lipin, putative	N/A	-0.02	0.999534	0.000202421
PBANKA_0942900	phenylalanine--tRNA ligase beta subunit, putative	N/A	-0.02	0.999777	9.68e-05
PBANKA_1435200	female development protein FD4	FD4	-0.02	0.999781	9.52e-05
PBANKA_0522700	alpha tubulin 2	N/A	-0.02	0.99982	7.8e-05
PBANKA_1461800	26S protease regulatory subunit 8, putative	RPT6	-0.02	0.999921	3.41e-05
PBANKA_0943300	actin-like protein, putative	ALP2a	-0.02	0.999992	3.43e-06
PBANKA_1405500	exosome complex component RRP40, putative	RRP40	-0.02	0.999993	3.14e-06
PBANKA_0711200	ubiquitin-like protein, putative	N/A	-0.02	0.999997	1.49e-06
PBANKA_1338600	60S ribosomal protein L23, putative	RPL23	-0.02	1	9.08e-08
PBANKA_0206000	ATP synthase-associated protein, putative	N/A	-0.01	0.897429	0.0469999
PBANKA_0938900	IWS1-like protein, putative	N/A	-0.01	0.928572	0.0321844
PBANKA_0408600	eukaryotic translation initiation factor 3 subunit K, putative	EIF3K	-0.01	0.958259	0.0185172
PBANKA_1226500	proteasome subunit beta type-4, putative	N/A	-0.01	0.960644	0.0174377
PBANKA_1226600	tubulin gamma chain, putative	N/A	-0.01	0.963032	0.0163591
PBANKA_1345600	elongation factor Tu, putative	N/A	-0.01	0.967094	0.0145315
PBANKA_0414500	protein YOP1	YOP1	-0.01	0.970499	0.0130049
PBANKA_0401600	N-ethylmaleimide-sensitive fusion protein, putative	NSF	-0.01	0.973308	0.0117499
PBANKA_0922300	threonine--tRNA ligase, putative	ThrRS	-0.01	0.985452	0.00636441
PBANKA_1415500	U4/U6.U5 tri-snRNP-associated protein 2, putative	USP39	-0.01	0.988686	0.00494181
PBANKA_0937100	vacuolar protein sorting-associated protein 35, putative	VPS35	-0.01	0.991392	0.00375448
PBANKA_0928800	splicing factor U2AF small subunit, putative	U2AF1	-0.01	0.991601	0.00366321
PBANKA_1214000	heat shock protein 60, putative	HSP60	-0.01	0.993554	0.00280856
PBANKA_1131100	adenylosuccinate synthetase, putative	ADSS	-0.01	0.99516	0.00210699
PBANKA_1460400	peptidyl-prolyl cis-trans isomerase FKBP35, putative	FKBP35	-0.01	0.99697	0.00131794
PBANKA_0906900	DnaJ domain-containing protein, putative	N/A	-0.01	0.997593	0.00104642
PBANKA_0617100	60S ribosomal protein L11a, putative	N/A	-0.01	0.998598	0.000609508
PBANKA_1026600	protein SEY1, putative	SEY1	-0.01	0.999184	0.000354391
PBANKA_0801500	conserved Plasmodium protein, unknown function	N/A	-0.01	0.999887	4.9e-05
PBANKA_1028300	serine/threonine protein phosphatase PP1	PP1	-0.01	0.999929	3.08e-05
PBANKA_1029600	conserved Plasmodium protein, unknown function	N/A	-0.01	0.999933	2.89e-05
PBANKA_1144000	26S proteasome regulatory subunit RPN11, putative	RPN11	-0.01	0.99995	2.16e-05
PBANKA_1315500	sortilin, putative	SORTLR	-0.01	0.999978	9.39e-06
PBANKA_1213100	prohibitin 2	PHB2	-0.01	0.999996	1.88e-06
PBANKA_0518700	methionine--tRNA ligase, putative	N/A	-0.01	1	1.13e-07
PBANKA_0404300	P-loop containing nucleoside triphosphate hydrolase, putative	N/A	-0.01	1	5.85e-08
PBANKA_1133200	cdc2-related kinase 2	CRK2	0	0.843521	0.0739041
PBANKA_0313800	ATP synthase subunit alpha, mitochondrial, putative	N/A	0	0.883966	0.0535646
PBANKA_1320400	conserved Plasmodium protein, unknown function	N/A	0	0.916412	0.0379092
PBANKA_1015100	conserved Plasmodium protein, unknown function	N/A	0	0.954505	0.0202218
PBANKA_0101900	RNA-binding protein, putative	N/A	0	0.955015	0.0199896
PBANKA_0602200	signal recognition particle subunit SRP14, putative	SRP14	0	0.978779	0.00931537
PBANKA_0828900	conserved Plasmodium protein, unknown function	N/A	0	0.981765	0.00799231
PBANKA_1450400	peptidase, putative	N/A	0	0.982526	0.00765594
PBANKA_1340000	dihydrofolate synthase/folylpolyglutamate synthase, putative	DHFS-FPGS	0	0.992323	0.00334711
PBANKA_0615700	dynein heavy chain, putative	N/A	0	0.994364	0.0024548
PBANKA_0612300	apicomplexan kinetochore protein 7	AKIT7	0	0.994755	0.00228367
PBANKA_1321700	berghepain-1	BP1	0	0.995312	0.00204071
PBANKA_0502200	26S proteasome regulatory subunit p55, putative	RPN5	0	0.997505	0.00108511
PBANKA_0923700	ethanolamine kinase, putative	EK	0	0.997509	0.00108328
PBANKA_0922500	kelch domain-containing protein, putative	N/A	0	0.998022	0.000859764
PBANKA_1356300	CDT1-like protein, putative	N/A	0	0.998251	0.00076044
PBANKA_1422400	importin subunit beta, putative	N/A	0	0.998424	0.000684964
PBANKA_0819900	nucleosome assembly protein	NAPS	0	0.998664	0.000580399
PBANKA_1032700	CUGBP Elav-like family member 2, putative	CELF2	0	0.998814	0.000515287
PBANKA_0929900	heat shock protein 90, putative	N/A	0	0.999679	0.000139407
PBANKA_0517500	bromodomain protein 1, putative	BDP1	0	0.999839	6.97e-05
PBANKA_1012800	voltage-dependent anion-selective channel protein, putative	N/A	0	0.999902	4.25e-05
PBANKA_1107200	protein CAF40, putative	CAF40	0	0.999903	4.22e-05
PBANKA_0923200	ATP synthase F0 subunit b-like protein, putative	ICAP2	0	0.999946	2.33e-05
PBANKA_0701500	prohibitin 1	PHB1	0	0.999965	1.5e-05
PBANKA_1018600	60S ribosomal protein L21, putative	RPL21	0	0.999999	5.1e-07
PBANKA_1211000	GMP synthase [glutamine-hydrolyzing], putative	GMPS	0	1	2.35e-08
PBANKA_0315600	40S ribosomal protein S30, putative	N/A	0	1	3.97e-09
PBANKA_1450600	vesicle transport v-SNARE protein VTI1, putative	N/A	0.01	0.847793	0.07171
PBANKA_1437300	endoplasmin, putative	GRP94	0.01	0.87517	0.0579074
PBANKA_1454600	nucleoporin NUP269	NUP269	0.01	0.87847	0.0562732
PBANKA_1445500	pre-mRNA-splicing regulator WTAP, putative	WTAP	0.01	0.89303	0.0491339
PBANKA_1218400	protein transport protein SEC22, putative	SEC22	0.01	0.925404	0.0336685
PBANKA_1205400	rho GTPase-activating protein, putative	N/A	0.01	0.931997	0.0305856
PBANKA_0942500	thioredoxin-like mero protein, putative	Trx-mero	0.01	0.936322	0.0285748
PBANKA_1303300	cytochrome b-c1 complex subunit Rieske, putative	N/A	0.01	0.938716	0.027466
PBANKA_0710100	2-oxoglutarate dehydrogenase E1 component, putative	KDH	0.01	0.952997	0.0209086
PBANKA_1223800	V-type proton ATPase subunit a, putative	N/A	0.01	0.956559	0.0192882
PBANKA_1450300	ATP synthase subunit beta, mitochondrial	ATPbeta	0.01	0.959126	0.0181242
PBANKA_0104400	nucleoside diphosphate kinase, putative	N/A	0.01	0.965053	0.0154487
PBANKA_0604700	shewanella-like protein phosphatase 2, putative	SHLP2	0.01	0.965333	0.015323
PBANKA_1320700	signal peptide peptidase, putative	SPP	0.01	0.966421	0.0148338
PBANKA_0408400	phosphoglycerate mutase, putative	N/A	0.01	0.970485	0.0130111
PBANKA_0415200	vacuolar protein sorting-associated protein 46, putative	VPS46	0.01	0.970687	0.0129209
PBANKA_0509700	dynein, putative	N/A	0.01	0.972771	0.0119893
PBANKA_1039400	ribosomal protein S27a, putative	N/A	0.01	0.973085	0.0118494
PBANKA_0716600	acylated pleckstrin-homology domain-containing protein, putative	APH	0.01	0.974586	0.0111798
PBANKA_1035500	vacuolar protein sorting-associated protein 29, putative	VPS29	0.01	0.977555	0.00985888
PBANKA_1457400	N-alpha-acetyltransferase 15, NatA auxiliary subunit, putative	N/A	0.01	0.978383	0.00949089
PBANKA_0611800	N-acetyltransferase, GNAT family, putative	NAT8	0.01	0.97881	0.00930176
PBANKA_0314200	calcium-dependent protein kinase 1	CDPK1	0.01	0.978947	0.00924098
PBANKA_1209900	conserved protein, unknown function	N/A	0.01	0.984179	0.00692585
PBANKA_0905600	translation initiation factor eIF-1A, putative	N/A	0.01	0.986495	0.00590524
PBANKA_1328100	ATP synthase (C/AC39) subunit, putative	N/A	0.01	0.987364	0.00552268
PBANKA_0409800	ATP synthase F0 subunit d-like protein, putative	N/A	0.01	0.988079	0.00520813
PBANKA_1336100	dihydroorotase, putative	DHOase	0.01	0.988381	0.0050754
PBANKA_0913700	coatomer subunit delta, putative	N/A	0.01	0.988945	0.00482793
PBANKA_0302000	translocation protein SEC66, putative	SEC66	0.01	0.989877	0.00441896
PBANKA_0938600	casein kinase 2, alpha subunit	CK2alpha	0.01	0.990804	0.00401214
PBANKA_1343900	PUB domain-containing protein, putative	N/A	0.01	0.99349	0.0028364
PBANKA_0416400	ATP synthase-associated protein, putative	N/A	0.01	0.994796	0.00226597
PBANKA_0828100	fumarate hydratase, putative	FH	0.01	0.995141	0.00211528
PBANKA_0916400	ubiquitin-like protein, putative	N/A	0.01	0.995192	0.00209325
PBANKA_1355200	aconitate hydratase, putative	IRP	0.01	0.995501	0.0019582
PBANKA_1237800	multidrug resistance protein 1, putative	MDR1	0.01	0.997008	0.00130117
PBANKA_0920000	multiprotein-bridging factor 1, putative	MBF1	0.01	0.998242	0.00076401
PBANKA_0414900	dynein intermediate light chain, putative	N/A	0.01	0.998925	0.000466906
PBANKA_0406300	DNA polymerase delta small subunit, putative	N/A	0.01	0.999135	0.000375865
PBANKA_0801900	RNA cytosine C(5)-methyltransferase, putative	NSUN1	0.01	0.99943	0.000247455
PBANKA_1310500	apicomplexan kinetochore protein 4	AKIT4	0.01	0.999989	4.99e-06
PBANKA_0607900	cGMP-specific 3',5'-cyclic phosphodiesterase alpha, putative	PDEalpha	0.01	0.999996	1.86e-06
PBANKA_1223100	proteasome subunit alpha type-6, putative	N/A	0.01	0.999999	2.42e-07
PBANKA_1407000	conserved Plasmodium protein, unknown function	N/A	0.01	1	1.31e-07
PBANKA_0803600	importin-7, putative	N/A	0.01	1	5.77e-08
PBANKA_0719400	LETM1-like protein, putative	N/A	0.02	0.575906	0.239648
PBANKA_0201800	TatD-like deoxyribonuclease	TatD	0.02	0.904732	0.0434801
PBANKA_1355500	casein kinase II beta chain, putative	CK2beta2	0.02	0.949128	0.022675
PBANKA_1410300	M1-family alanyl aminopeptidase, putative	M1AAP	0.02	0.958696	0.0183189
PBANKA_1143600	alanine--tRNA ligase, putative	AlaRS	0.02	0.960835	0.0173512
PBANKA_1440700	ubiquitin-activating enzyme E1, putative	UBA1	0.02	0.966699	0.0147088
PBANKA_1116300	malate:quinone oxidoreductase, putative	MQO	0.02	0.969225	0.0135753
PBANKA_1117700	malate dehydrogenase, putative	MDH	0.02	0.973945	0.0114655
PBANKA_1036600	ribonucleoside-diphosphate reductase small chain, putative	N/A	0.02	0.974974	0.0110068
PBANKA_0203800	phenylalanine--tRNA ligase alpha subunit, putative	N/A	0.02	0.978193	0.00957551
PBANKA_1434200	arginine--tRNA ligase, putative	RRS	0.02	0.979474	0.00900706
PBANKA_1103400	60S ribosomal protein L31, putative	RPL31	0.02	0.985899	0.00616772
PBANKA_1336900	conserved Plasmodium protein, unknown function	N/A	0.02	0.985922	0.00615766
PBANKA_1112400	orotate phosphoribosyltransferase, putative	OPRT	0.02	0.987688	0.00538038
PBANKA_1415100	choline-phosphate cytidylyltransferase	CCT	0.02	0.988106	0.00519639
PBANKA_1226100	conserved Plasmodium protein, unknown function	N/A	0.02	0.988928	0.00483552
PBANKA_1034400	plasmepsin IV	PM4	0.02	0.994883	0.00222819
PBANKA_0605300	eukaryotic translation initiation factor 5, putative	EIF5	0.02	0.995299	0.00204658
PBANKA_1413100	lipoate-protein ligase 1	LipL1	0.02	0.997126	0.00124996
PBANKA_1424200	conserved protein, unknown function	N/A	0.02	0.998061	0.000842869
PBANKA_1032300	CTP synthase, putative	CTPS	0.02	0.998474	0.000663184
PBANKA_1441900	DNA helicase 60, putative	DH60	0.02	0.999113	0.000385313
PBANKA_0719300	bifunctional dihydrofolate reductase-thymidylate synthase, putative	DHFR-TS	0.02	0.999304	0.000302296
PBANKA_1034100	FANCJ-like helicase, putative	FANCJ	0.02	0.999319	0.000295966
PBANKA_1347700	isoleucine--tRNA ligase, putative	N/A	0.02	0.999394	0.000263066
PBANKA_1122800	ribonuclease H2 subunit A, putative	N/A	0.02	0.999713	0.000124777
PBANKA_1418300	golgi protein 1, putative	PRP2	0.02	0.999775	9.77e-05
PBANKA_0513900	ORC3 domain-containing protein, putative	N/A	0.02	0.99989	4.77e-05
PBANKA_1239200	ribosome-interacting GTPase 1, putative	RBG1	0.02	0.99993	3.03e-05
PBANKA_0516600	leucine-rich repeat protein 1	LRR1	0.02	0.999952	2.07e-05
PBANKA_1359700	6-cysteine protein P47	P47	0.02	0.999983	7.51e-06
PBANKA_0802300	HECT-type E3 ubiquitin ligase UT, putative	N/A	0.03	0.6318	0.19942
PBANKA_0909100	ER membrane protein complex subunit 8, putative	EMC8	0.03	0.707232	0.150438
PBANKA_0927200	conserved protein, unknown function	N/A	0.03	0.851827	0.0696484
PBANKA_0904500	SUMO-activating enzyme subunit 1, putative	AOS1	0.03	0.856202	0.0674238
PBANKA_0210600	ubiquitin carboxyl-terminal hydrolase, putative	N/A	0.03	0.857113	0.0669619
PBANKA_1010200	methionine aminopeptidase 2, putative	METAP2	0.03	0.892002	0.0496341
PBANKA_0904100	ras-related protein Rab-6	RAB6	0.03	0.897362	0.0470322
PBANKA_1426100	conserved protein, unknown function	N/A	0.03	0.918194	0.0370656
PBANKA_1210700	cytochrome b-c1 complex subunit 7, putative	QCR7	0.03	0.922094	0.035225
PBANKA_1365200	thioredoxin-related protein, putative	N/A	0.03	0.961329	0.0171279
PBANKA_0717900	RNA-binding protein, putative	N/A	0.03	0.974517	0.0112108
PBANKA_0202300	UMP-CMP kinase, putative	N/A	0.03	0.980007	0.00877081
PBANKA_0709100	60S ribosomal protein L22, putative	N/A	0.03	0.981348	0.00817689
PBANKA_0716000	structural maintenance of chromosomes protein 3, putative	SMC3	0.03	0.985162	0.00649256
PBANKA_1306300	protein KIC9, putative	N/A	0.03	0.987614	0.00541259
PBANKA_0925400	dynein heavy chain, putative	N/A	0.03	0.990854	0.00399047
PBANKA_0102700	conserved Plasmodium protein, unknown function	N/A	0.03	0.99254	0.00325205
PBANKA_0828600	cytochrome c oxidase subunit 5B, putative	COX5B	0.03	0.993049	0.00302931
PBANKA_1202700	RNA-binding protein, putative	N/A	0.03	0.993351	0.00289713
PBANKA_1418900	ras-related protein Rab-11A	Rab11a	0.03	0.993398	0.00287658
PBANKA_1227400	serine/threonine protein phosphatase 2B catalytic subunit A	CNA	0.03	0.995187	0.00209539
PBANKA_0936100	acylphosphatase, putative	N/A	0.03	0.995545	0.00193897
PBANKA_0416600	replication protein A1, small fragment	N/A	0.03	0.995605	0.00191291
PBANKA_1354100	ras-related protein Rab-11B, putative	RAB11b	0.03	0.996057	0.00171564
PBANKA_0604300	tetratricopeptide repeat protein, putative	TRP1	0.03	0.998523	0.000642058
PBANKA_0406200	conserved Plasmodium protein, unknown function	N/A	0.03	0.99881	0.000517223
PBANKA_1310800	40S ribosomal protein S5, putative	N/A	0.03	0.999179	0.000356644
PBANKA_1348000	transmembrane emp24 domain-containing protein, putative	N/A	0.03	0.999358	0.000278996
PBANKA_0824700	thioredoxin reductase, putative	TRXR	0.03	0.999484	0.000224187
PBANKA_0506100	PHAX domain-containing protein, putative	N/A	0.03	0.999637	0.000157545
PBANKA_0823900	DNA-directed RNA polymerase II subunit RPB3, putative	RPB3	0.03	0.999646	0.000153749
PBANKA_1321500	conserved Plasmodium protein, unknown function	N/A	0.03	0.999701	0.000129928
PBANKA_0600500	GPN-loop GTPase, putative	N/A	0.03	0.999781	9.51e-05
PBANKA_1134700	conserved Plasmodium protein, unknown function	N/A	0.03	0.999795	8.89e-05
PBANKA_1234800	40S ribosomal protein S9, putative	RPS9	0.03	0.999861	6.04e-05
PBANKA_1213000	transcriptional coactivator ADA2, putative	ADA2	0.03	0.999905	4.11e-05
PBANKA_0912600	conserved Plasmodium protein, unknown function	N/A	0.03	0.999975	1.06e-05
PBANKA_0901200	peroxisome assembly protein 22, putative	PEX22	0.03	0.999985	6.57e-06
PBANKA_1010600	calmodulin, putative	CAM	0.03	0.99999	4.32e-06
PBANKA_1329700	26S proteasome regulatory subunit RPN2, putative	RPN2	0.03	0.999999	3.92e-07
PBANKA_0505300	conserved Plasmodium protein, unknown function	N/A	0.03	1	1.46e-08
PBANKA_1335200	pre-mRNA-splicing factor ISY1, putative	ISY1	0.04	0.818555	0.086952
PBANKA_1453500	HD superfamily phosphohydrolase protein, putative	N/A	0.04	0.835037	0.0782943
PBANKA_1321200	vacuolar protein sorting-associated protein 4, putative	VPS4	0.04	0.856404	0.0673215
PBANKA_1115800	conserved Plasmodium protein, unknown function	N/A	0.04	0.85669	0.0671763
PBANKA_1002000	Ran-binding protein, putative	N/A	0.04	0.8782	0.0564065
PBANKA_0809400	plasma membrane protein 1	PMP1	0.04	0.905305	0.043205
PBANKA_0715900	ubiquitin carboxyl-terminal hydrolase 13, putative	USP13	0.04	0.911895	0.040055
PBANKA_0930300	GTP-binding nuclear protein RAN/TC4, putative	N/A	0.04	0.914481	0.0388255
PBANKA_0819300	eukaryotic translation initiation factor 3 subunit F, putative	EIF3F	0.04	0.930274	0.031389
PBANKA_1016300	proliferation-associated protein 2g4, putative	N/A	0.04	0.934402	0.0294662
PBANKA_0602500	threonylcarbamoyl-AMP synthase, putative	SUA5	0.04	0.940818	0.0264946
PBANKA_0204800	secreted ookinete protein, putative	PSOP24	0.04	0.945931	0.0241407
PBANKA_0938400	endoplasmic reticulum-resident calcium binding protein, putative	ERC	0.04	0.949886	0.0223284
PBANKA_0509300	glutamine--fructose-6-phosphate aminotransferase [isomerizing], putative	N/A	0.04	0.953312	0.0207649
PBANKA_1105500	mediator of RNA polymerase II transcription subunit 11, putative	MED11	0.04	0.961047	0.0172555
PBANKA_0602000	origin recognition complex subunit 1, putative	ORC1	0.04	0.965707	0.0151545
PBANKA_0517900	conserved protein, unknown function	N/A	0.04	0.970718	0.0129071
PBANKA_1356400	DNA repair protein RAD5, putative	RAD5	0.04	0.977005	0.0101033
PBANKA_1446800	60 kDa chaperonin, putative	CPN60	0.04	0.978661	0.00936781
PBANKA_0401900	DNA-directed RNA polymerases I, II, and III subunit RPABC2, putative	RPB6	0.04	0.981034	0.00831589
PBANKA_1430800	thioredoxin peroxidase 2, putative	Trx-Px2	0.04	0.981947	0.00791197
PBANKA_0601200	dynein heavy chain, putative	N/A	0.04	0.983028	0.00743396
PBANKA_1304500	protein SOC3	SOC3	0.04	0.994937	0.00220424
PBANKA_1023500	eukaryotic translation initiation factor 3 subunit H, putative	EIF3H	0.04	0.995851	0.00180585
PBANKA_1127800	DnaJ protein, putative	N/A	0.04	0.997263	0.00119037
PBANKA_1115700	kinetochore protein NDC80	NDC80	0.04	0.999283	0.000311341
PBANKA_1425000	RNA-binding protein, putative	N/A	0.04	0.999312	0.000298847
PBANKA_0520700	WD repeat-containing protein, putative	N/A	0.04	0.999493	0.000220133
PBANKA_1336400	DnaJ protein, putative	N/A	0.04	0.999512	0.000211811
PBANKA_1425100	karyopherin alpha, putative	KARalpha	0.04	0.999889	4.82e-05
PBANKA_1008000	armadillo-type repeat protein ATRP, putative	ATRP	0.04	0.999898	4.43e-05
PBANKA_0504800	conserved Plasmodium protein, unknown function	N/A	0.04	0.999954	2.01e-05
PBANKA_1025500	CCR4-NOT transcription complex subunit NOT1, putative	NOT1	0.04	1	3.52e-08
PBANKA_1446500	asparagine-rich protein, putative	N/A	0.04	1	3.21e-08
PBANKA_1030600	phospholipase PL39, putative	N/A	0.05	0.755407	0.121819
PBANKA_0823500	glutamine synthetase	N/A	0.05	0.763822	0.117008
PBANKA_0909500	AAA family ATPase, putative	N/A	0.05	0.824112	0.0840138
PBANKA_1201100	conserved Plasmodium protein, unknown function	N/A	0.05	0.83119	0.0802999
PBANKA_0402300	lipoamide acyltransferase component of branched-chain alpha-keto acid dehydrogenase complex, putative	BCKDH-E2	0.05	0.87604	0.0574761
PBANKA_0821700	inosine-5'-monophosphate dehydrogenase, putative	N/A	0.05	0.878533	0.0562419
PBANKA_1222300	coatomer subunit epsilon, putative	SEC28	0.05	0.924268	0.0342021
PBANKA_1451600	SUMO-activating enzyme subunit 2, putative	UBA2	0.05	0.95809	0.0185935
PBANKA_1024900	DNA replication licensing factor MCM2, putative	MCM2	0.05	0.959673	0.0178768
PBANKA_0904400	transcription initiation factor IIF subunit beta, putative	TFG2	0.05	0.964268	0.0158023
PBANKA_1308600	fructose-bisphosphate aldolase 2	ALDO2	0.05	0.969185	0.0135934
PBANKA_1201500	respiratory chain complex 4 associated protein 3, putative	N/A	0.05	0.969323	0.0135313
PBANKA_1242800	eukaryotic translation initiation factor 3 subunit E, putative	EIF3E	0.05	0.973697	0.0115762
PBANKA_1231200	phosducin-like protein 1, putative	PhLP1	0.05	0.978326	0.00951619
PBANKA_1006100	flap endonuclease 1, putative	FEN1	0.05	0.980074	0.00874099
PBANKA_0615200	calcium-dependent protein kinase 4	CDPK4	0.05	0.980095	0.00873202
PBANKA_1313800	signal recognition particle subunit SRP54, putative	SRP54	0.05	0.983952	0.00702597
PBANKA_1102900	cell division control protein 6, putative	CDC6	0.05	0.985748	0.00623418
PBANKA_1423900	translation initiation factor SUI1, putative	N/A	0.05	0.985833	0.00619668
PBANKA_0720300	eukaryotic translation initiation factor 3 subunit M, putative	EIF3M	0.05	0.987314	0.00554489
PBANKA_0916100	nucleic acid binding protein, putative	N/A	0.05	0.98765	0.00539709
PBANKA_1213700	methionine aminopeptidase 1b, putative	METAP1b	0.05	0.988184	0.00516209
PBANKA_0830000	RNA-binding protein, putative	N/A	0.05	0.988386	0.0050735
PBANKA_1206100	eukaryotic translation initiation factor 3 subunit D, putative	EIF3D	0.05	0.98864	0.00496165
PBANKA_1104200	2-oxoisovalerate dehydrogenase subunit beta, mitochondrial, putative	BCKDHB	0.05	0.98887	0.0048608
PBANKA_0619100	40S ribosomal protein S5, putative	N/A	0.05	0.989117	0.00475249
PBANKA_0507300	dynein heavy chain, putative	N/A	0.05	0.989898	0.00440939
PBANKA_0941900	histone H4, putative	H4	0.05	0.990084	0.00432798
PBANKA_0818500	conserved protein, unknown function	N/A	0.05	0.992435	0.00329782
PBANKA_1037900	conserved Plasmodium protein, unknown function	N/A	0.05	0.993603	0.00278694
PBANKA_0505400	conserved Plasmodium protein, unknown function	N/A	0.05	0.993773	0.00271264
PBANKA_1206900	tubulin beta chain, putative	N/A	0.05	0.995904	0.00178268
PBANKA_1122000	nuclear polyadenylated RNA-binding protein NAB2	NAB2	0.05	0.99609	0.00170129
PBANKA_0416100	dynein heavy chain, putative	MG1	0.05	0.99624	0.00163592
PBANKA_0303900	pantothenate transporter	PAT	0.05	0.997504	0.00108523
PBANKA_1023400	glutathione reductase, putative	GR	0.05	0.997505	0.00108479
PBANKA_1429400	dynein light chain 1, putative	N/A	0.05	0.998161	0.00079923
PBANKA_0417700	alpha tubulin 1	N/A	0.05	0.999084	0.000398051
PBANKA_0826300	thioredoxin-like protein 2, putative	TLP2	0.05	0.999375	0.000271331
PBANKA_1108600	alpha-soluble NSF attachment protein, putative	N/A	0.05	0.999694	0.000132715
PBANKA_1202400	60S ribosomal protein L13, putative	N/A	0.05	0.999802	8.6e-05
PBANKA_0712100	DNA helicase, putative	N/A	0.05	0.999822	7.73e-05
PBANKA_1348100	AMMECR1 domain-containing protein, putative	N/A	0.05	0.999959	1.79e-05
PBANKA_1340400	lactate dehydrogenase, putative	N/A	0.05	0.999975	1.1e-05
PBANKA_1013100	60S ribosomal protein L14, putative	N/A	0.05	0.999979	9.24e-06
PBANKA_1009700	ribonuclease H2 subunit B, putative	N/A	0.05	0.99999	4.44e-06
PBANKA_1210800	hypoxanthine-guanine phosphoribosyltransferase, putative	HGPRT	0.05	0.999994	2.6e-06
PBANKA_0407500	N2227-like protein, putative	N/A	0.06	0.419915	0.376839
PBANKA_0517800	Sec1 family protein, putative	SLY1	0.06	0.763917	0.116954
PBANKA_1137000	bergheilysin	BLN	0.06	0.808953	0.0920768
PBANKA_0110200	lsm12, putative	N/A	0.06	0.917626	0.0373345
PBANKA_1452900	dynactin subunit 3, putative	N/A	0.06	0.93125	0.0309335
PBANKA_1328300	ATP-dependent zinc metalloprotease FTSH, putative	N/A	0.06	0.935533	0.028941
PBANKA_1232100	serine/arginine-rich splicing factor 1, putative	SR1	0.06	0.937417	0.0280671
PBANKA_0412100	serine/threonine protein phosphatase 6	PPP6	0.06	0.94606	0.0240813
PBANKA_1402600	DNA ligase I, putative	N/A	0.06	0.950642	0.021983
PBANKA_0310500	conserved Plasmodium protein, unknown function	N/A	0.06	0.952535	0.0211191
PBANKA_0813000	inhibitor of cysteine proteases	ICP	0.06	0.957148	0.0190211
PBANKA_0204200	tubulin-specific chaperone a, putative	N/A	0.06	0.960271	0.0176061
PBANKA_1233500	mRNA-binding protein PUF1	PUF1	0.06	0.968507	0.0138971
PBANKA_1119300	ATP synthase-associated protein, putative	N/A	0.06	0.985241	0.00645745
PBANKA_1028700	26S proteasome regulatory subunit RPN13, putative	RPN13	0.06	0.986462	0.00591985
PBANKA_1361600	E1-E2 ATPase, putative	N/A	0.06	0.986718	0.00580687
PBANKA_1001100	ubiquitin-specific protease, putative	N/A	0.06	0.986785	0.00577741
PBANKA_0721700	ran-specific GTPase-activating protein 1, putative	RANBP1	0.06	0.987671	0.00538786
PBANKA_1233100	proteasome subunit beta type-1, putative	N/A	0.06	0.990265	0.0042484
PBANKA_1442200	protein SOC2	SOC2	0.06	0.991536	0.00369157
PBANKA_1010000	mitochondrial acidic protein MAM33, putative	N/A	0.06	0.991964	0.003504
PBANKA_0611600	ribonucleoside-diphosphate reductase large subunit, putative	N/A	0.06	0.992487	0.00327531
PBANKA_1029400	conserved Plasmodium protein, unknown function	N/A	0.06	0.993484	0.00283912
PBANKA_1238800	karyopherin beta, putative	N/A	0.06	0.993779	0.00271002
PBANKA_1007200	replication protein A1, large subunit, putative	RPA1	0.06	0.996487	0.00152826
PBANKA_1234400	zinc finger protein, putative	N/A	0.06	0.99694	0.00133102
PBANKA_1106700	60S ribosomal protein L4, putative	RPL4	0.06	0.997344	0.00115515
PBANKA_1434900	raf kinase inhibitor, putative	RKIP	0.06	0.998628	0.000596266
PBANKA_1231700	60S ribosomal protein L2, putative	RPL2	0.06	0.99881	0.000517097
PBANKA_0312500	origin recognition complex subunit 5, putative	ORC5	0.06	0.998857	0.000496628
PBANKA_0932400	berghepain-2	BP2	0.06	0.999746	0.000110366
PBANKA_0719100	conserved Plasmodium protein, unknown function	N/A	0.06	0.999817	7.97e-05
PBANKA_1133300	elongation factor 1-alpha	EF-1alpha	0.06	0.999834	7.2e-05
PBANKA_0942400	WD repeat-containing protein, putative	N/A	0.06	0.999999	4.83e-07
PBANKA_1338300	60S ribosomal protein L6, putative	N/A	0.06	1	1.28e-07
PBANKA_1033900	40S ribosomal protein S8e, putative	N/A	0.06	1	0
PBANKA_1408500	ATP synthase subunit O, mitochondrial, putative	OSCP	0.07	0.729704	0.136853
PBANKA_1216500	peptidyl-prolyl cis-trans isomerase, putative	CYP19A	0.07	0.888943	0.0511259
PBANKA_1038800	EGF domain-containing protein, putative	N/A	0.07	0.903526	0.0440593
PBANKA_1038000	cytochrome c, putative	N/A	0.07	0.917539	0.0373755
PBANKA_1409800	ATP synthase subunit gamma, mitochondrial, putative	N/A	0.07	0.917916	0.0371973
PBANKA_0301900	Sel1 repeat-containing protein, putative	N/A	0.07	0.939401	0.0271491
PBANKA_1014400	acid phosphatase, putative	N/A	0.07	0.94492	0.0246052
PBANKA_0302500	hexose transporter	HT1	0.07	0.948254	0.0230753
PBANKA_1458300	kinesin-13	N/A	0.07	0.951059	0.0217926
PBANKA_1348500	Voldacs domain-containing protein, putative	N/A	0.07	0.957115	0.0190357
PBANKA_0509800	cytochrome c oxidase copper chaperone, putative	COX17	0.07	0.958436	0.0184368
PBANKA_0929700	haloacid dehalogenase-like hydrolase, putative	N/A	0.07	0.964249	0.0158108
PBANKA_1432000	signal recognition particle subunit SRP19, putative	SRP19	0.07	0.965603	0.0152015
PBANKA_1314100	E3 ubiquitin-protein ligase ZNF598, putative	N/A	0.07	0.966472	0.0148106
PBANKA_0719700	conserved Plasmodium protein, unknown function	N/A	0.07	0.972848	0.011955
PBANKA_1122900	hexokinase, putative	HK	0.07	0.975685	0.0106904
PBANKA_1003800	V-type proton ATPase subunit B, putative	N/A	0.07	0.97786	0.00972313
PBANKA_0833100	M18 aspartyl aminopeptidase, putative	M18AAP	0.07	0.991783	0.00358327
PBANKA_1030100	actin II	ACT2	0.07	0.992182	0.00340874
PBANKA_0917000	conserved Plasmodium protein, unknown function	N/A	0.07	0.993512	0.00282674
PBANKA_1429600	proline--tRNA ligase	PRS	0.07	0.994917	0.00221313
PBANKA_0202700	kinesin-8B	N/A	0.07	0.996472	0.0015348
PBANKA_1423500	60S ribosomal protein L13-2, putative	N/A	0.07	0.998772	0.000533739
PBANKA_0903600	dynamin-like protein, putative	DYN1	0.07	0.998822	0.000511903
PBANKA_1452500	conserved Plasmodium protein, unknown function	N/A	0.07	0.999279	0.000313449
PBANKA_1241900	ubiquitin-conjugating enzyme E2 13, putative	UBC13	0.07	0.999281	0.00031251
PBANKA_1131500	conserved Plasmodium protein, unknown function	N/A	0.07	0.999592	0.00017718
PBANKA_1102200	merozoite surface protein 8	MSP8	0.07	0.999676	0.000140842
PBANKA_1411100	2-oxoisovalerate dehydrogenase subunit alpha, mitochondrial	BCKDHA	0.07	0.999706	0.000127774
PBANKA_0101000	MYND-type zinc finger protein, putative	N/A	0.07	0.999795	8.9e-05
PBANKA_0804300	DNA mismatch repair protein MSH2	MSH2-2	0.07	0.999847	6.65e-05
PBANKA_1131600	DNA replication licensing factor MCM6, putative	MCM6	0.07	0.999847	6.64e-05
PBANKA_1318100	aminopeptidase P, putative	APP	0.07	0.999886	4.93e-05
PBANKA_0416500	copper-transporting ATPase	CuTP	0.07	0.999996	1.73e-06
PBANKA_1420600	histone H2B variant, putative	H2B.Z	0.07	1	8.66e-08
PBANKA_0834400	mitochondrial-processing peptidase subunit beta, putative	QCR1	0.08	0.810589	0.0911995
PBANKA_0919800	bifunctional farnesyl/geranylgeranyl diphosphate synthase, putative	FPPS/GGPPS	0.08	0.873422	0.0587759
PBANKA_1022800	glycine--tRNA ligase, putative	GlyRS	0.08	0.891748	0.0497578
PBANKA_0602700	nucleosome assembly protein, putative	NAPL	0.08	0.895405	0.0479806
PBANKA_1126500	acetyl-CoA synthetase, putative	ACAS	0.08	0.950641	0.0219834
PBANKA_0209300	actin-related protein ARP1	ARP1	0.08	0.956114	0.0194901
PBANKA_1406800	40S ribosomal protein S27, putative	RPS27	0.08	0.962592	0.0165579
PBANKA_1131900	serine/threonine protein phosphatase 5	PP5	0.08	0.970979	0.01279
PBANKA_0943100	CCR4-NOT transcription complex subunit NOT1-G, putative	NOT1-G	0.08	0.972617	0.012058
PBANKA_0104700	elongation of fatty acids protein, putative	ELO-B	0.08	0.974132	0.0113823
PBANKA_0618300	Ham1-like protein, putative	N/A	0.08	0.977317	0.00996472
PBANKA_1404900	26S protease regulatory subunit 10B, putative	RPT4	0.08	0.985895	0.00616915
PBANKA_0934700	conserved protein, unknown function	N/A	0.08	0.988507	0.00502015
PBANKA_1207000	nucleolar protein 5, putative	NOP5	0.08	0.99361	0.00278402
PBANKA_0304300	adenylosuccinate lyase, putative	ADSL	0.08	0.993655	0.00276438
PBANKA_1346700	60S ribosomal protein L23, putative	N/A	0.08	0.993862	0.00267385
PBANKA_1430900	SUN domain-containing protein, putative	N/A	0.08	0.995817	0.0018203
PBANKA_1348800	origin recognition complex subunit 4, putative	ORC4	0.08	0.995876	0.00179461
PBANKA_1456100	40S ribosomal protein S17, putative	N/A	0.08	0.996179	0.00166273
PBANKA_0717500	nuclear cap-binding protein subunit 2, putative	CBP20	0.08	0.997261	0.00119131
PBANKA_1209400	inner membrane complex sub-compartment protein 1	ISP1	0.08	0.998598	0.000609377
PBANKA_0522800	40S ribosomal protein S19, putative	RPS19	0.08	0.999057	0.000409619
PBANKA_0928500	ATP-dependent zinc metalloprotease FTSH, putative	N/A	0.08	0.999325	0.000293184
PBANKA_1331400	MORC family protein, putative	MORC	0.08	0.99945	0.000239143
PBANKA_0816400	ATP-dependent 6-phosphofructokinase, putative	PFK9	0.08	0.999793	8.99e-05
PBANKA_1426700	hydroxymethyldihydropterin pyrophosphokinase-dihydropteroate synthase, putative	PPPK-DHPS	0.09	0.858552	0.0662334
PBANKA_0928100	phosphoglycerate mutase, putative	PGM1	0.09	0.908961	0.0414549
PBANKA_1326800	replication factor C subunit 3, putative	RFC3	0.09	0.919903	0.0362579
PBANKA_0509200	Eps15-like protein, putative	N/A	0.09	0.941503	0.0261783
PBANKA_1120200	pyridoxine biosynthesis protein PDX1, putative	PDX1	0.09	0.94654	0.0238612
PBANKA_1400600	cytoadherence linked asexual protein, putative	RhopH1A	0.09	0.952011	0.021358
PBANKA_1230500	THO complex subunit 4, putative	ALYREF	0.09	0.953553	0.0206552
PBANKA_1223400	conserved Plasmodium protein, unknown function	N/A	0.09	0.954629	0.0201654
PBANKA_1423300	DNA/RNA-binding protein Alba 1, putative	ALBA1	0.09	0.956828	0.0191661
PBANKA_1314800	elongation factor 2, putative	eEF2	0.09	0.957674	0.0187823
PBANKA_0607400	protein phosphatase PPM11, putative	PPM11	0.09	0.97588	0.0106034
PBANKA_0105300	WD repeat-containing protein, putative	N/A	0.09	0.978465	0.00945478
PBANKA_1428300	WD repeat-containing protein, putative	N/A	0.09	0.981653	0.0080421
PBANKA_0920900	protein disulfide-isomerase, putative	N/A	0.09	0.984429	0.00681557
PBANKA_0701600	coiled-coil domain-containing protein 124, putative	CCDC124	0.09	0.991549	0.00368572
PBANKA_0803100	DNA replication licensing factor MCM7, putative	MCM7	0.09	0.993161	0.00298041
PBANKA_0522900	pre-mRNA-splicing helicase BRR2, putative	BRR2	0.09	0.993795	0.00270324
PBANKA_0927700	DDRGK domain-containing protein, putative	N/A	0.09	0.996796	0.00139389
PBANKA_1007000	chaperone protein DnaJ, putative	N/A	0.09	0.997762	0.000972927
PBANKA_1455100	replication factor C subunit 4, putative	RFC4	0.09	0.997904	0.000911166
PBANKA_1236600	conserved Plasmodium protein, unknown function	N/A	0.09	0.998551	0.000629729
PBANKA_0517200	haloacid dehalogenase-like hydrolase, putative	HAD1	0.09	0.998705	0.000562615
PBANKA_1129600	TPH domain-containing protein, putative	N/A	0.09	0.999043	0.000415764
PBANKA_0415800	WD repeat-containing protein 66, putative	WDR66	0.09	0.999226	0.000336169
PBANKA_1415000	pre-mRNA-processing factor 40, putative	PRP40	0.09	0.999617	0.000166582
PBANKA_1246161	fam-a protein	N/A	0.09	0.999822	7.73e-05
PBANKA_1206300	PHD finger protein PHD1, putative	PHD1	0.09	0.99993	3.05e-05
PBANKA_0619900	Obg-like ATPase 1, putative	OLA1	0.09	0.999991	3.8e-06
PBANKA_0107400	ornithine aminotransferase, putative	OAT	0.09	0.999993	3.21e-06
PBANKA_0709000	protein transport protein SEC61 subunit beta, putative	SEC61B	0.09	0.999998	6.99e-07
PBANKA_1344400	AMP deaminase	AMPD	0.1	0.273345	0.563288
PBANKA_0902400	kinesin-X4	N/A	0.1	0.625307	0.203907
PBANKA_1123500	ISWI chromatin-remodeling complex ATPase, putative	ISWI	0.1	0.818831	0.0868057
PBANKA_0829700	guanylate kinase, putative	GK	0.1	0.84908	0.0710515
PBANKA_0813900	26S proteasome regulatory subunit RPN8, putative	RPN8	0.1	0.867913	0.061524
PBANKA_0919600	CCR4-NOT transcription complex subunit 2, putative	NOT2	0.1	0.915181	0.038493
PBANKA_0910200	protein phosphatase PPM2	PPM2	0.1	0.91554	0.0383228
PBANKA_1362900	lysine--tRNA ligase, putative	KRS1	0.1	0.938386	0.0276183
PBANKA_0830200	high molecular weight rhoptry protein 2	RhopH2	0.1	0.941045	0.0263897
PBANKA_0824800	polyadenylate-binding protein 2, putative	PABP2	0.1	0.954673	0.0201453
PBANKA_1016700	leucine-rich repeat protein	N/A	0.1	0.956802	0.0191777
PBANKA_1357800	conserved Plasmodium protein, unknown function	N/A	0.1	0.966339	0.0148706
PBANKA_0108800	histone H3	H3	0.1	0.973377	0.0117188
PBANKA_0307100	conserved Plasmodium protein, unknown function	N/A	0.1	0.976371	0.010385
PBANKA_1417900	conserved protein, unknown function	N/A	0.1	0.981564	0.00808147
PBANKA_0107200	conserved Plasmodium protein, unknown function	N/A	0.1	0.984534	0.00676936
PBANKA_1018500	transcription factor BTF3, putative	BTF3	0.1	0.989459	0.00460236
PBANKA_1424300	NPL domain-containing protein, putative	N/A	0.1	0.989562	0.00455715
PBANKA_0717000	ATPase GET3, putative	GET3	0.1	0.989857	0.00442744
PBANKA_1324100	ubiquitin carboxyl-terminal hydrolase isozyme L3, putative	UCHL3	0.1	0.994032	0.00259954
PBANKA_1303500	cytochrome c oxidase subunit NDUFA4, putative	NDUFA4	0.1	0.995357	0.00202096
PBANKA_1038200	nuclear formin-like protein MISFIT	MISFIT	0.1	0.995707	0.00186855
PBANKA_0711900	heat shock protein 70	HSP70	0.1	0.996101	0.0016967
PBANKA_0305900	protein P22	Pb22	0.1	0.996427	0.00155454
PBANKA_1358900	dynactin subunit 2, putative	N/A	0.1	0.997555	0.00106329
PBANKA_1424400	CS domain protein, putative	N/A	0.1	0.997834	0.000941565
PBANKA_0804900	E3 ubiquitin-protein ligase, putative	N/A	0.1	0.997961	0.000886498
PBANKA_1309500	conserved Plasmodium protein, unknown function	N/A	0.1	0.99865	0.000586781
PBANKA_1427200	protein phosphatase PPM5	PPM5	0.1	0.998786	0.000527609
PBANKA_1022000	40S ribosomal protein S25, putative	N/A	0.1	0.998938	0.000461537
PBANKA_1215600	40S ribosomal protein S3A, putative	RPS3A	0.1	0.999384	0.000267706
PBANKA_1117100	histone H3 variant	H3.3	0.1	0.999384	0.000267551
PBANKA_0941200	tRNA-splicing ligase RtcB, putative	RTCB	0.1	0.999797	8.8e-05
PBANKA_1108000	CFA20 domain-containing protein, putative	N/A	0.1	0.999986	6.29e-06
PBANKA_0902300	female development protein FD2	FD2	0.1	0.999989	4.93e-06
PBANKA_1421900	GTP-binding translation elongation factor, putative	N/A	0.11	0.6815	0.166534
PBANKA_1356700	kelch protein K13, putative	Kelch13	0.11	0.962144	0.0167599
PBANKA_1137800	glideosome-associated connector	GAC	0.11	0.971391	0.0126058
PBANKA_1439800	splicing factor 3B subunit 6, putative	SF3B6	0.11	0.980364	0.00861273
PBANKA_0406800	pre-mRNA-processing factor 19, putative	PRPF19	0.11	0.986479	0.00591217
PBANKA_1026200	NADP-specific glutamate dehydrogenase, putative	GDH1	0.11	0.988552	0.00500067
PBANKA_1005800	conserved Plasmodium protein, unknown function	N/A	0.11	0.990139	0.00430363
PBANKA_1348900	chaperone binding protein, putative	N/A	0.11	0.99133	0.00378167
PBANKA_0933700	mitogen-activated protein kinase 2	MAPK2	0.11	0.994989	0.00218189
PBANKA_1354400	60S ribosomal protein L18, putative	N/A	0.11	0.99794	0.000895597
PBANKA_1405000	MORN repeat protein, putative	N/A	0.11	0.999194	0.000350299
PBANKA_0108100	conserved Plasmodium protein, unknown function	N/A	0.11	0.999327	0.000292442
PBANKA_1134200	pyrroline-5-carboxylate reductase, putative	N/A	0.11	0.999983	7.35e-06
PBANKA_1446900	dihydrolipoyl dehydrogenase, mitochondrial, putative	LPD1	0.12	0.598987	0.222582
PBANKA_0102100	dihydroorotate dehydrogenase, putative	DHODH	0.12	0.740357	0.130559
PBANKA_1318900	methyltransferase AAMT, putative	N/A	0.12	0.780943	0.107381
PBANKA_1327300	fam-a protein	N/A	0.12	0.804321	0.0945707
PBANKA_0615600	thioredoxin-like protein	N/A	0.12	0.902071	0.0447592
PBANKA_1319200	AP-1 complex subunit gamma, putative	N/A	0.12	0.920265	0.0360873
PBANKA_1010500	Hsp70/Hsp90 organizing protein, putative	HOP	0.12	0.920265	0.0360873
PBANKA_0208600	conserved protein, unknown function	N/A	0.12	0.948568	0.0229314
PBANKA_0823400	phosphoglycerate kinase, putative	PGK	0.12	0.950687	0.0219624
PBANKA_0613700	RNA-binding protein, putative	N/A	0.12	0.953098	0.0208623
PBANKA_1358700	conserved Plasmodium protein, unknown function	N/A	0.12	0.956648	0.0192476
PBANKA_0615400	serine--tRNA ligase, putative	N/A	0.12	0.962127	0.0167675
PBANKA_1222000	histone deacetylase complex subunit SAP18, putative	SAP18	0.12	0.967095	0.0145307
PBANKA_0610200	DNA replication licensing factor MCM5, putative	MCM5	0.12	0.97749	0.00988749
PBANKA_0918000	60S acidic ribosomal protein P0, putative	N/A	0.12	0.978289	0.00953272
PBANKA_0720000	conserved Plasmodium protein, unknown function	N/A	0.12	0.978306	0.00952513
PBANKA_1011400	DNA topoisomerase 2, putative	TOP2	0.12	0.979819	0.00885416
PBANKA_1205000	G-strand-binding protein 2	GBP2	0.12	0.982903	0.00748914
PBANKA_0507800	conserved protein, unknown function	N/A	0.12	0.983807	0.00709018
PBANKA_1308900	histidine--tRNA ligase, putative	N/A	0.12	0.986421	0.00593768
PBANKA_1241800	DNA replication licensing factor MCM3, putative	MCM3	0.12	0.992031	0.00347484
PBANKA_1305100	60S ribosomal protein L1, putative	N/A	0.12	0.992119	0.00343632
PBANKA_1207700	zinc finger protein, putative	ZNF2	0.12	0.992371	0.00332577
PBANKA_1431500	radial spoke protein 9	RSP9	0.12	0.996508	0.00151915
PBANKA_0835600	cAMP-dependent protein kinase catalytic subunit, putative	PKAc	0.12	0.999786	9.28e-05
PBANKA_0924100	thioredoxin-like protein, putative	N/A	0.12	0.999831	7.35e-05
PBANKA_1125300	centrosomal protein CEP135, putative	CEP135	0.12	0.999858	6.18e-05
PBANKA_1028100	mRNA-capping enzyme subunit alpha, putative	N/A	0.12	0.999948	2.25e-05
PBANKA_1329500	protein phosphatase containing kelch-like domains	PPKL	0.12	0.999979	9.01e-06
PBANKA_0937200	RNA-binding protein, putative	N/A	0.12	0.999993	2.84e-06
PBANKA_1406200	TOM1-like protein, putative	N/A	0.13	0.0535755	1.27103
PBANKA_0928700	ubiquitin-protein ligase, putative	N/A	0.13	0.706517	0.150878
PBANKA_1350700	tryptophan--tRNA ligase, putative	cTrpRS	0.13	0.784072	0.105644
PBANKA_0707500	RWD domain-containing protein, putative	N/A	0.13	0.817564	0.087478
PBANKA_0809100	proteasome activator 28, putative	PA28	0.13	0.859968	0.0655178
PBANKA_1303800	triosephosphate isomerase, putative	TIM	0.13	0.878557	0.0562299
PBANKA_0314700	replication factor C subunit 2, putative	RFC2	0.13	0.884959	0.0530769
PBANKA_1326300	cytochrome c1, heme protein, mitochondrial, putative	CYT1	0.13	0.900357	0.0455854
PBANKA_0933800	conserved Plasmodium protein, unknown function	N/A	0.13	0.914578	0.0387794
PBANKA_1206600	26S protease regulatory subunit 4, putative	N/A	0.13	0.92007	0.0361793
PBANKA_0806800	coiled-coil domain-containing protein CCDC148/CCDC112, putative	N/A	0.13	0.940689	0.0265538
PBANKA_0920100	prefoldin subunit 5	PCS5	0.13	0.941779	0.0260508
PBANKA_0410300	26S proteasome regulatory subunit RPN12, putative	RPN12	0.13	0.94364	0.0251935
PBANKA_0510900	40S ribosomal protein S2, putative	RPS2	0.13	0.958139	0.0185714
PBANKA_1218200	T-complex protein 1 subunit epsilon, putative	CCT5	0.13	0.972917	0.011924
PBANKA_1326400	glyceraldehyde-3-phosphate dehydrogenase	GAPDH	0.13	0.977452	0.00990445
PBANKA_1359200	DNA/RNA-binding protein Alba 2, putative	ALBA2	0.13	0.983622	0.00717196
PBANKA_1462000	THUMP domain-containing protein, putative	N/A	0.13	0.995659	0.00188939
PBANKA_1452600	calcyclin binding protein, putative	N/A	0.13	0.99728	0.00118303
PBANKA_1018300	dynein intermediate chain, putative	N/A	0.13	0.998511	0.000647108
PBANKA_0405600	end-binding protein 1	EB1	0.13	0.998804	0.000519702
PBANKA_1408000	H/ACA ribonucleoprotein complex subunit 1, putative	GAR1	0.13	0.999725	0.000119656
PBANKA_0610500	glutathione peroxidase-like thioredoxin peroxidase	TPx(Gl)	0.14	0.162264	0.789779
PBANKA_0929800	insulinase, putative	N/A	0.14	0.47977	0.318967
PBANKA_1122400	superoxide dismutase [Fe], putative	SOD2	0.14	0.507782	0.294323
PBANKA_1130400	proteasome subunit alpha type-4, putative	N/A	0.14	0.711038	0.148107
PBANKA_0100800	zinc finger protein, putative	N/A	0.14	0.718793	0.143396
PBANKA_1444000	macrophage migration inhibitory factor	MIF	0.14	0.901876	0.044853
PBANKA_1340300	phosphoribosylpyrophosphate synthetase, putative	N/A	0.14	0.924232	0.0342189
PBANKA_0622700	mago nashi protein homologue, putative	N/A	0.14	0.947683	0.0233368
PBANKA_1455300	tetratricopeptide repeat protein, putative	N/A	0.14	0.961817	0.0169075
PBANKA_1323200	AP-4 complex accessory subunit Tepsin, putative	N/A	0.14	0.981583	0.00807289
PBANKA_0310900	T-complex protein 1 subunit theta, putative	CCT8	0.14	0.98351	0.00722107
PBANKA_0501700	phosphomannomutase, putative	HAD5	0.14	0.984624	0.00672943
PBANKA_0917400	armadillo repeat protein PF16	PF16	0.14	0.986177	0.00604525
PBANKA_1346200	signal peptidase complex catalytic subunit SEC11, putative	SEC11	0.14	0.986666	0.00582983
PBANKA_0414600	40S ribosomal protein S15A, putative	N/A	0.14	0.987577	0.00542904
PBANKA_1231000	40S ribosomal protein S11, putative	RPS11	0.14	0.987851	0.0053085
PBANKA_1214200	ribonucleoside-diphosphate reductase small chain, putative	N/A	0.14	0.988798	0.00489238
PBANKA_1134100	T-complex protein 1 subunit delta, putative	CCT4	0.14	0.990609	0.00409794
PBANKA_1108700	structural maintenance of chromosomes protein 4	SMC4	0.14	0.99151	0.00370286
PBANKA_1035700	WD repeat-containing protein 65, putative	WDR65	0.14	0.995971	0.00175323
PBANKA_0416800	ubiquitin specific protease, putative	N/A	0.14	0.996383	0.00157356
PBANKA_0503200	eukaryotic translation initiation factor subunit eIF2A, putative	N/A	0.14	0.998858	0.000496214
PBANKA_0719600	memo-like protein	N/A	0.14	0.999177	0.00035759
PBANKA_1132400	conserved Plasmodium protein, unknown function	N/A	0.14	0.999976	1.03e-05
PBANKA_0702400	conserved protein, unknown function	N/A	0.15	0.704833	0.151914
PBANKA_0402800	EH domain-containing protein, putative	EHD	0.15	0.814853	0.0889206
PBANKA_0618400	tetratricopeptide repeat protein, putative	N/A	0.15	0.848821	0.0711837
PBANKA_1450200	serine hydroxymethyltransferase, putative	SHMT	0.15	0.916658	0.0377928
PBANKA_0820700	TLD domain-containing protein	N/A	0.15	0.917997	0.0371589
PBANKA_0416000	high molecular weight rhoptry protein 3, putative	RhopH3	0.15	0.943577	0.0252225
PBANKA_0702000	coiled-coil domain-containing protein 39, putative	N/A	0.15	0.951721	0.0214903
PBANKA_0306800	ATP-dependent RNA helicase UAP56, putative	UAP56	0.15	0.952798	0.0209992
PBANKA_1219200	cytochrome c oxidase subunit 4, putative	COX4	0.15	0.953791	0.0205468
PBANKA_1033700	conserved Plasmodium protein, unknown function	N/A	0.15	0.962842	0.0164451
PBANKA_0820600	pyridoxal phosphate homeostasis protein, putative	N/A	0.15	0.967786	0.0142205
PBANKA_1358300	conserved Plasmodium protein, unknown function	N/A	0.15	0.976496	0.0103297
PBANKA_1355100	40S ribosomal protein S6, putative	N/A	0.15	0.97666	0.0102567
PBANKA_1454800	female development protein FD1	FD1	0.15	0.981599	0.0080658
PBANKA_1432400	perforin-like protein 2	PLP2	0.15	0.982698	0.00757972
PBANKA_0316000	replication factor C subunit 1, putative	RFC1	0.15	0.985901	0.00616675
PBANKA_1231800	60S ribosomal protein L12, putative	N/A	0.15	0.993283	0.00292719
PBANKA_0302300	aspartate aminotransferase, putative	AspAT	0.15	0.994164	0.00254213
PBANKA_1428900	bromodomain protein 2, putative	BDP2	0.15	0.999186	0.000353799
PBANKA_0617200	40S ribosomal protein S10, putative	RPS10	0.15	0.999934	2.85e-05
PBANKA_0604200	zinc finger protein, putative	N/A	0.16	0.811851	0.0905239
PBANKA_1208500	PI31 domain-containing protein, putative	N/A	0.16	0.820931	0.0856932
PBANKA_1347400	DNA-(apurinic or apyrimidinic site) lyase 1	APN1	0.16	0.82855	0.0816814
PBANKA_1135200	GTP-binding protein, putative	N/A	0.16	0.83062	0.0805977
PBANKA_1222400	ubiquitin regulatory protein, putative	N/A	0.16	0.847705	0.0717552
PBANKA_0807100	stomatin-like protein	STOML	0.16	0.850613	0.070268
PBANKA_1437200	conserved Plasmodium protein, unknown function	N/A	0.16	0.857038	0.0669997
PBANKA_1125500	ATPase, putative	N/A	0.16	0.871138	0.0599129
PBANKA_0835100	ATP synthase-associated protein, putative	N/A	0.16	0.884178	0.0534603
PBANKA_0417400	GTPase-activating protein, putative	N/A	0.16	0.925356	0.033691
PBANKA_0905800	DnaJ protein, putative	N/A	0.16	0.934939	0.0292165
PBANKA_0602800	ubiquitin-conjugating enzyme E2, putative	UBC	0.16	0.960753	0.0173882
PBANKA_0937900	conserved Plasmodium protein, unknown function	N/A	0.16	0.967768	0.0142289
PBANKA_1320100	conserved Plasmodium protein, unknown function	UIS25	0.16	0.970426	0.0130375
PBANKA_1103000	serine/arginine-rich splicing factor 12, putative	SRSF12	0.16	0.974033	0.0114264
PBANKA_1135500	high mobility group protein B4, putative	HMGB4	0.16	0.98595	0.00614489
PBANKA_1308000	conserved Plasmodium protein, unknown function	N/A	0.16	0.999989	4.9e-06
PBANKA_0405200	T-complex protein 1 subunit beta, putative	CCT2	0.17	0.817189	0.0876776
PBANKA_0941800	histone H2B, putative	H2B	0.17	0.825596	0.0832326
PBANKA_1417800	tRNA (guanine(26)-N(2))-dimethyltransferase, putative	TRM1	0.17	0.846348	0.0724509
PBANKA_0720600	trafficking protein particle complex subunit 3, putative	BET3	0.17	0.901246	0.0451568
PBANKA_1214300	enolase, putative	ENO	0.17	0.934747	0.0293058
PBANKA_1309900	M17 leucyl aminopeptidase, putative	LAP	0.17	0.94229	0.0258156
PBANKA_0807000	DNA-directed RNA polymerase II subunit RPB1, putative	RPB1	0.17	0.947014	0.0236436
PBANKA_0942300	radial spoke head protein, putative	N/A	0.17	0.981875	0.00794364
PBANKA_1360500	ethanolamine-phosphate cytidylyltransferase	ECT	0.17	0.982776	0.00754566
PBANKA_1223000	conserved Plasmodium protein, unknown function	N/A	0.17	0.992923	0.0030846
PBANKA_1117000	histone H2A, putative	H2A	0.17	0.998659	0.000582991
PBANKA_1112700	conserved protein, unknown function	N/A	0.17	0.998745	0.000545314
PBANKA_0810600	exoribonuclease, putative	N/A	0.17	0.999617	0.000166178
PBANKA_1135100	40S ribosomal protein S15, putative	RPS15	0.17	0.999898	4.45e-05
PBANKA_1330000	enkurin domain-containing protein, putative	N/A	0.17	0.999982	7.92e-06
PBANKA_0519900	conserved Plasmodium protein, unknown function	N/A	0.17	1	2.16e-07
PBANKA_0919100	parasitophorous vacuolar protein 1	PV1	0.18	0.467961	0.32979
PBANKA_1405200	conserved Plasmodium protein, unknown function	N/A	0.18	0.652138	0.18566
PBANKA_0312400	DNA-directed RNA polymerase II subunit RPB2, putative	RPB2	0.18	0.707444	0.150308
PBANKA_0931300	dipeptidyl aminopeptidase 1, putative	DPAP1	0.18	0.720116	0.142597
PBANKA_0601900	high mobility group protein B1, putative	HMGB1	0.18	0.765413	0.116104
PBANKA_1356900	U4/U6 small nuclear ribonucleoprotein PRP4, putative	PRPF4	0.18	0.837044	0.0772518
PBANKA_0835300	V-type proton ATPase subunit E, putative	N/A	0.18	0.912613	0.0397135
PBANKA_1329300	40S ribosomal protein S3, putative	N/A	0.18	0.931694	0.0307265
PBANKA_0916200	T-complex protein 1 subunit alpha, putative	TCP1	0.18	0.956658	0.0192431
PBANKA_1345800	RNA-binding protein, putative	N/A	0.18	0.991328	0.00378254
PBANKA_0921600	alternative splicing factor SR-MG	SR-MG	0.18	0.996913	0.00134268
PBANKA_1127700	nicotinate phosphoribosyltransferase, putative	NAPRT	0.18	0.99983	7.39e-05
PBANKA_0205400	proteasome subunit beta type-3, putative	N/A	0.19	0.821733	0.0852691
PBANKA_1436200	histone-lysine N-methyltransferase, H3 lysine-4 specific, putative	SET10	0.19	0.840633	0.0753935
PBANKA_1228000	1-cys peroxiredoxin, putative	1-CysPxn	0.19	0.892873	0.0492102
PBANKA_1201900	40S ribosomal protein S20e, putative	N/A	0.19	0.951187	0.0217339
PBANKA_0816200	ribonuclease H2 subunit C, putative	N/A	0.19	0.964656	0.0156276
PBANKA_1309700	ATP-dependent RNA helicase DDX17, putative	DDX17	0.19	0.99196	0.0035059
PBANKA_0404700	glutaredoxin 1, putative	GRX1	0.19	0.992786	0.00314419
PBANKA_1402900	PUB domain-containing protein, putative	N/A	0.19	0.999919	3.51e-05
PBANKA_1035900	glycerophosphodiester phosphodiesterase, putative	GDPD	0.2	0.568376	0.245364
PBANKA_0718800	small GTP-binding protein sar1, putative	SAR1	0.2	0.699548	0.155182
PBANKA_0807900	nucleoporin NUP335	NUP335	0.2	0.777683	0.109197
PBANKA_0825600	splicing factor 3A subunit 3, putative	SF3A3	0.2	0.921133	0.0356778
PBANKA_0916600	oxysterol-binding protein, putative	N/A	0.2	0.924449	0.0341169
PBANKA_1302600	DNA primase small subunit, putative	N/A	0.2	0.924947	0.033883
PBANKA_1325600	valine--tRNA ligase, putative	N/A	0.2	0.945556	0.0243126
PBANKA_0922100	40S ribosomal protein S18, putative	RPS18	0.2	0.967358	0.0144127
PBANKA_1337600	BRCT domain-containing protein, putative	N/A	0.2	0.982399	0.00771209
PBANKA_0406500	T-complex protein 1 subunit eta, putative	CCT7	0.2	0.984511	0.00677951
PBANKA_0315800	ribosome associated membrane protein RAMP4, putative	N/A	0.2	0.998113	0.000820173
PBANKA_0905700	DNA-directed RNA polymerases I and III subunit RPAC1, putative	RPC40	0.2	0.999865	5.87e-05
PBANKA_0205000	ELM2 domain-containing protein, putative	N/A	0.2	0.999913	3.76e-05
PBANKA_0605500	conserved Plasmodium protein, unknown function	N/A	0.2	1	1.69e-09
PBANKA_1416900	structural maintenance of chromosomes protein 2	SMC2	0.21	0.492208	0.307852
PBANKA_1217600	histone H2A.Z, putative	H2A.Z	0.21	0.929149	0.0319146
PBANKA_0939300	coiled-coil domain-containing protein 40, putative	N/A	0.22	0.712217	0.147388
PBANKA_1243900	apicomplexan kinetochore protein 5	AKIT5	0.22	0.966444	0.0148233
PBANKA_1422700	superoxide dismutase [Fe], putative	FeSOD	0.22	0.966677	0.0147187
PBANKA_1340100	L-lactate dehydrogenase	LDH	0.22	0.966721	0.0146988
PBANKA_1343200	conserved Plasmodium protein, unknown function	N/A	0.22	0.999879	5.25e-05
PBANKA_1421100	transcription elongation factor s-II, putative	N/A	0.23	0.295665	0.5292
PBANKA_0524300	tryptophan-rich protein IPIS2	IPIS2	0.23	0.568341	0.245391
PBANKA_1357700	aspartate carbamoyltransferase, putative	ATCase	0.23	0.708681	0.149549
PBANKA_0508100	chromodomain-helicase-DNA-binding protein 1, putative	CHD1	0.23	0.86972	0.0606208
PBANKA_1334300	exported protein 2	EXP2	0.23	0.878428	0.0562941
PBANKA_1318400	6-phosphogluconate dehydrogenase, decarboxylating, putative	6PGD	0.23	0.933747	0.0297707
PBANKA_0310000	protein SIS1, putative	SIS1	0.23	0.940313	0.0267277
PBANKA_1432500	DNA-binding chaperone, putative	N/A	0.23	0.942778	0.0255905
PBANKA_0811600	selenide water dikinase, putative	N/A	0.23	0.999629	0.000161321
PBANKA_1023900	glutathione S-transferase, putative	GST	0.24	0.743327	0.12882
PBANKA_0819800	gamma-glutamylcysteine synthetase	gammaGCS	0.24	0.914123	0.0389953
PBANKA_0715600	26S protease regulatory subunit 6B, putative	RPT3	0.24	0.93945	0.0271264
PBANKA_0805700	heat shock protein 90	HSP90	0.24	0.988606	0.00497698
PBANKA_0913400	protein phosphatase PPM8	PPM8	0.25	0.637813	0.195307
PBANKA_1004000	cytosolic glyoxalase II, putative	cGLO2	0.25	0.843377	0.0739782
PBANKA_0714200	chaperone protein ClpB1, putative	ClpB1	0.25	0.858914	0.0660503
PBANKA_0804100	conserved Plasmodium protein, unknown function	N/A	0.25	0.991631	0.00364972
PBANKA_1101400	rhoptry-associated protein 2/3	RAP2/3	0.26	0.898346	0.0465563
PBANKA_0709400	conserved Plasmodium protein, unknown function	N/A	0.26	0.941908	0.0259914
PBANKA_0942700	chromatin remodeling protein, putative	SNF2L	0.26	0.968843	0.0137467
PBANKA_1409600	meiosis-specific nuclear structural protein 1, putative	N/A	0.26	0.99861	0.00060418
PBANKA_0812000	DNA primase large subunit, putative	N/A	0.27	0.328088	0.48401
PBANKA_1146000	tryptophan-rich protein	N/A	0.27	0.62804	0.202013
PBANKA_1327021	fam-a protein	N/A	0.27	0.660534	0.180105
PBANKA_1463900	HSP20-like chaperone, putative	N/A	0.27	0.996953	0.00132519
PBANKA_0818600	pre-mRNA-splicing factor ATP-dependent RNA helicase PRP43, putative	PRP43	0.27	0.998964	0.000450144
PBANKA_1008500	translocon component PTEX150	PTEX150	0.28	0.878127	0.0564424
PBANKA_1341600	translation initiation factor eIF-2B subunit gamma, putative	N/A	0.28	0.967048	0.0145519
PBANKA_0524200	early transcribed membrane protein	37500	0.29	0.368307	0.43379
PBANKA_1343000	ribose-phosphate pyrophosphokinase, putative	N/A	0.29	0.384959	0.414585
PBANKA_0618600	conserved protein, unknown function	N/A	0.29	0.689832	0.161257
PBANKA_1341500	RNA-binding protein, putative	N/A	0.29	0.82932	0.081278
PBANKA_1333100	protein MGET, putative	N/A	0.29	0.924302	0.0341863
PBANKA_1325300	splicing factor 3B subunit 2, putative	SF3B2	0.29	0.947682	0.0233371
PBANKA_0417800	protein hook, putative	N/A	0.3	0.94509	0.024527
PBANKA_1433000	conserved protein, unknown function	N/A	0.3	0.999802	8.59e-05
PBANKA_0805900	kinesin-8X	N/A	0.3	0.999859	6.1e-05
PBANKA_0100200	Plasmodium exported protein, unknown function	N/A	0.31	0.367853	0.434325
PBANKA_1138700	conserved Plasmodium protein, unknown function	N/A	0.31	0.999444	0.000241491
PBANKA_0911700	subtilisin-like protease 2	SUB2	0.32	0.35369	0.451378
PBANKA_1107100	subtilisin-like protease 1	SUB1	0.32	0.584169	0.233462
PBANKA_1237500	pre-mRNA-splicing factor BUD31, putative	BUD31	0.32	0.675487	0.170383
PBANKA_0931200	heat shock protein 101	HSP101	0.34	0.0747604	1.12633
PBANKA_0100700	Plasmodium exported protein, unknown function	N/A	0.34	0.894328	0.0485031
PBANKA_0200600	fam-a protein	N/A	0.35	0.473173	0.32498
PBANKA_1200600	Plasmodium exported protein, unknown function	N/A	0.35	0.987699	0.00537548
PBANKA_0810800	conserved protein, unknown function	N/A	0.36	0.632249	0.199112
PBANKA_1307800	heat shock protein 90, putative	N/A	0.36	0.863889	0.0635423
PBANKA_1222500	plasmepsin X, putative	PMX	0.37	0.00384	2.41567
PBANKA_0623100	tryptophan-rich protein IPIS3	IPIS3	0.37	0.388032	0.411133
PBANKA_0926700	exported protein 1	EXP1	0.37	0.684994	0.164313
PBANKA_0408500	parasite-infected erythrocyte surface protein	PIESP1	0.37	0.998127	0.000814061
PBANKA_1331100	conserved Plasmodium protein, unknown function	N/A	0.39	0.347038	0.459623
PBANKA_1458000	translation machinery-associated protein 46, putative	N/A	0.39	0.708822	0.149463
PBANKA_0502600	peptidase, putative	N/A	0.39	0.909359	0.0412645
PBANKA_1234200	40S ribosomal protein S24, putative	RPS24	0.4	0.658906	0.181177
PBANKA_0519200	conserved Plasmodium protein, unknown function	N/A	0.4	0.886793	0.0521778
PBANKA_0316200	Plasmodium exported protein, unknown function	N/A	0.41	0.69015	0.161057
PBANKA_1465000	fam-c protein	N/A	0.41	0.862171	0.0644063
PBANKA_0614000	conserved protein, unknown function	N/A	0.45	0.049567	1.30481
PBANKA_1237600	zinc finger protein, putative	N/A	0.45	0.0628379	1.20178
PBANKA_0201600	early transcribed membrane protein	ETRAMP	0.45	0.407508	0.389864
PBANKA_1349000	MSP7-like protein	MSRP2	0.47	0.997996	0.000871338
PBANKA_1244500	SNARE protein, putative	N/A	0.48	0.741408	0.129942
PBANKA_0932000	rhoptry neck protein 4	RON4	0.48	0.789826	0.102468
PBANKA_1032100	rhoptry-associated protein 1	RAP1	0.48	0.92636	0.0332203
PBANKA_0501100	early transcribed membrane protein	37865	0.49	0.391446	0.407328
PBANKA_1349300	conserved Plasmodium protein, unknown function	N/A	0.49	0.448999	0.347755
PBANKA_1427000	protein phosphatase PPM7	PPM7	0.51	0.581105	0.235746
PBANKA_1129200	conserved Plasmodium protein, unknown function	N/A	0.52	0.2067	0.68466
PBANKA_1443300	merozoite surface protein 9, putative	N/A	0.53	0.974236	0.0113358
PBANKA_0316800	erythrocyte membrane associated protein 2	EMAP2	0.54	0.382438	0.417439
PBANKA_1349200	MSP7-like protein	MSRP1	0.54	0.418522	0.378282
PBANKA_0517000	early transcribed membrane protein	ETRAMP10.2	0.55	0.20623	0.685648
PBANKA_1300096	fam-b protein	N/A	0.55	0.623684	0.205036
PBANKA_0831000	merozoite surface protein 1	MSP1	0.55	0.914225	0.0389469
PBANKA_0834000	calcyclin-binding protein, putative	N/A	0.55	0.948882	0.0227877
PBANKA_0311800	acyl-CoA synthetase, putative	ACS9	0.56	0.196266	0.707154
PBANKA_1221600	cell division cycle ATPase, putative	N/A	0.57	0.490472	0.309386
PBANKA_0305100	serine repeat antigen 1	SERA1	0.59	0.920565	0.0359455
PBANKA_1400700	Plasmodium exported protein, unknown function	N/A	0.6	0.258107	0.5882
PBANKA_0304900	serine repeat antigen 3	SERA3	0.61	0.759393	0.119533
PBANKA_1101300	skeleton-binding protein 1	SBP1	0.62	0.295227	0.529844
PBANKA_1224200	DnaJ protein, putative	N/A	0.63	0.549826	0.259775
PBANKA_0305000	serine repeat antigen 2	SERA2	0.63	0.866873	0.0620444
PBANKA_0300600	Plasmodium exported protein, unknown function	N/A	0.64	0.385748	0.413697
PBANKA_1220200	lysophospholipase, putative	N/A	0.67	0.23541	0.628175
PBANKA_1000600	erythrocyte membrane antigen 1	1000600	0.69	0.0406714	1.39071
PBANKA_0519300	conserved Plasmodium protein, unknown function	519300	0.69	0.901926	0.044829
PBANKA_1365500	exported protein IBIS1	IBIS1	0.73	0.233943	0.630891
PBANKA_0623300	tryptophan-rich protein	N/A	0.73	0.235674	0.627688
PBANKA_1229000	Plasmodium exported protein (PHIST), unknown function	N/A	0.73	0.318573	0.496791
PBANKA_1145800	membrane associated histidine-rich protein 1a	MAHRP1a	0.82	0.0939916	1.02691
PBANKA_0519100	merozoite surface protein, putative	519100	0.85	0.917091	0.0375876
PBANKA_0519400	conserved Plasmodium protein, unknown function	519400	0.91	0.945409	0.0243802
PBANKA_0836200	conserved Plasmodium protein, unknown function	836200	0.92	0.306327	0.513814
PBANKA_0519000	S-antigen, putative	519000	0.94	0.955092	0.0199546
PBANKA_1145900	membrane associated histidine-rich protein 1b	MAHRP1b	0.95	0.142806	0.845252
PBANKA_0512800	merozoite TRAP-like protein	MTRAP	1.04	0.0372264	1.42915
PBANKA_1312700	gamete egress and sporozoite traversal protein	GEST	1.06	0.0708992	1.14936
PBANKA_1113400	secreted ookinete protein	PSOP12	1.43	0.263458	0.579288
PBANKA_0704700	conserved Plasmodium protein, unknown function	704700	1.49	0.00585003	2.23284
PBANKA_0619200	secreted ookinete protein, putative	PSOP1	1.57	0.0319912	1.49497
PBANKA_1432200	male development gene 1	MDV1	1.61	0.0124666	1.90425
PBANKA_1463000	osmiophilic body protein G377	G377	1.75	0.00550802	2.259

## Sheet: Supp. Table 5
Supp. Table 5: Quantitative proteomics of Pbnek4-ko 0 hpa versus WT 0 hpa parasites
Master Protein Accessions	Gene descriptor	Gene symbol	Abundance Ratio (Log2)	Abundance Ratio P-Value	minus log10 p value
PBANKA_1446500	asparagine-rich protein, putative	N/A	1.7	0.635096	0.19716
PBANKA_1102200	merozoite surface protein 8	MSP8	1.54	0.595921	0.224812
PBANKA_1138700	conserved Plasmodium protein, unknown function	N/A	1.43	0.801773	0.0959485
PBANKA_0836200	conserved Plasmodium protein, unknown function	N/A	1.12	0.611408	0.213669
PBANKA_0315800	ribosome associated membrane protein RAMP4, putative	N/A	1.09	0.730172	0.136575
PBANKA_0932400	berghepain-2	BP2	1.08	0.549379	0.260128
PBANKA_1007000	chaperone protein DnaJ, putative	N/A	1.04	0.708534	0.149639
PBANKA_1229000	Plasmodium exported protein (PHIST), unknown function	N/A	1.01	0.580856	0.235931
PBANKA_1210200	PRE-binding protein, putative	PREBP	1.01	0.78008	0.107861
PBANKA_1334300	exported protein 2	EXP2	1	0.617836	0.209127
PBANKA_0623300	tryptophan-rich protein	N/A	0.92	0.500427	0.300659
PBANKA_1101300	skeleton-binding protein 1	SBP1	0.92	0.584562	0.23317
PBANKA_1462000	THUMP domain-containing protein, putative	N/A	0.92	0.64871	0.187949
PBANKA_1210800	hypoxanthine-guanine phosphoribosyltransferase, putative	HGPRT	0.92	0.662068	0.179097
PBANKA_1008500	translocon component PTEX150	PTEX150	0.91	0.627565	0.202341
PBANKA_0100700	Plasmodium exported protein, unknown function	N/A	0.89	0.699909	0.154958
PBANKA_1210100	DNA repair protein RAD23, putative	RAD23	0.88	0.628263	0.201859
PBANKA_1220200	lysophospholipase, putative	N/A	0.87	0.526205	0.278845
PBANKA_0914400	heat shock protein 70, putative	UIS24	0.85	0.591415	0.228108
PBANKA_1465000	fam-c protein	N/A	0.84	0.59408	0.226155
PBANKA_0300600	Plasmodium exported protein, unknown function	N/A	0.84	0.719234	0.14313
PBANKA_1345800	RNA-binding protein, putative	N/A	0.84	0.74205	0.129567
PBANKA_1349200	MSP7-like protein	MSRP1	0.83	0.747706	0.126269
PBANKA_1213000	transcriptional coactivator ADA2, putative	ADA2	0.82	0.545539	0.263174
PBANKA_1365500	exported protein IBIS1	IBIS1	0.81	0.568252	0.245459
PBANKA_1325300	splicing factor 3B subunit 2, putative	SF3B2	0.8	0.583446	0.233999
PBANKA_1307800	heat shock protein 90, putative	N/A	0.79	0.641063	0.193099
PBANKA_1145900	membrane associated histidine-rich protein 1b	MAHRP1b	0.79	0.787901	0.103528
PBANKA_0519900	conserved Plasmodium protein, unknown function	N/A	0.79	0.864643	0.0631633
PBANKA_1223000	conserved Plasmodium protein, unknown function	N/A	0.77	0.821426	0.0854316
PBANKA_0205000	ELM2 domain-containing protein, putative	N/A	0.76	0.525438	0.279479
PBANKA_0623100	tryptophan-rich protein IPIS3	IPIS3	0.76	0.69859	0.155778
PBANKA_1145800	membrane associated histidine-rich protein 1a	MAHRP1a	0.75	0.574503	0.240707
PBANKA_1305100	60S ribosomal protein L1, putative	N/A	0.75	0.66022	0.180311
PBANKA_1446800	60 kDa chaperonin, putative	CPN60	0.75	0.734975	0.133727
PBANKA_1221600	cell division cycle ATPase, putative	N/A	0.74	0.525384	0.279523
PBANKA_0801900	RNA cytosine C(5)-methyltransferase, putative	NSUN1	0.74	0.78511	0.105069
PBANKA_1200600	Plasmodium exported protein, unknown function	N/A	0.74	0.808822	0.0921471
PBANKA_0503200	eukaryotic translation initiation factor subunit eIF2A, putative	N/A	0.74	0.879601	0.0557145
PBANKA_1022000	40S ribosomal protein S25, putative	N/A	0.72	0.71415	0.14621
PBANKA_0918000	60S acidic ribosomal protein P0, putative	N/A	0.72	0.714212	0.146173
PBANKA_0926700	exported protein 1	EXP1	0.69	0.596583	0.224329
PBANKA_0820600	pyridoxal phosphate homeostasis protein, putative	N/A	0.69	0.769989	0.113515
PBANKA_0817700	RNA-binding protein musashi, putative	HoMu	0.69	0.818661	0.0868957
PBANKA_0311800	acyl-CoA synthetase, putative	ACS9	0.68	0.528968	0.27657
PBANKA_1460400	peptidyl-prolyl cis-trans isomerase FKBP35, putative	FKBP35	0.68	0.592291	0.227465
PBANKA_1103000	serine/arginine-rich splicing factor 12, putative	SRSF12	0.68	0.648202	0.18829
PBANKA_0823100	S-adenosylmethionine synthetase, putative	SAMS	0.68	0.875219	0.0578832
PBANKA_0407700	60S acidic ribosomal protein P2, putative	N/A	0.67	0.0385952	1.41347
PBANKA_0943600	60S acidic ribosomal protein P1, putative	N/A	0.67	0.180642	0.743182
PBANKA_1325000	40S ribosomal protein S28e, putative	N/A	0.67	0.513053	0.289837
PBANKA_0805700	heat shock protein 90	HSP90	0.67	0.699277	0.155351
PBANKA_1018500	transcription factor BTF3, putative	BTF3	0.67	0.760572	0.118859
PBANKA_1432500	DNA-binding chaperone, putative	N/A	0.66	0.640883	0.193221
PBANKA_1424300	NPL domain-containing protein, putative	N/A	0.66	0.66768	0.175432
PBANKA_1010000	mitochondrial acidic protein MAM33, putative	N/A	0.65	0.365019	0.437684
PBANKA_1242300	Hsc70-interacting protein, putative	HIP	0.65	0.655603	0.183359
PBANKA_0316200	Plasmodium exported protein, unknown function	N/A	0.65	0.795754	0.0992214
PBANKA_1424200	conserved protein, unknown function	N/A	0.65	0.848549	0.071323
PBANKA_0617200	40S ribosomal protein S10, putative	RPS10	0.65	0.855273	0.0678954
PBANKA_1355100	40S ribosomal protein S6, putative	N/A	0.64	0.734321	0.134114
PBANKA_0603200	eukaryotic translation initiation factor 5A, putative	EIF5A	0.63	0.390866	0.407972
PBANKA_1207000	nucleolar protein 5, putative	NOP5	0.63	0.571157	0.243245
PBANKA_1205900	AP2 domain transcription factor AP2-I, putative	ApiAP2	0.63	0.724813	0.139774
PBANKA_0107400	ornithine aminotransferase, putative	OAT	0.63	0.827546	0.0822078
PBANKA_0942700	chromatin remodeling protein, putative	SNF2L	0.63	0.892549	0.049368
PBANKA_0408500	parasite-infected erythrocyte surface protein	PIESP1	0.63	0.901459	0.0450543
PBANKA_1205000	G-strand-binding protein 2	GBP2	0.62	0.74225	0.12945
PBANKA_1400700	Plasmodium exported protein, unknown function	N/A	0.62	0.748437	0.125845
PBANKA_0401900	DNA-directed RNA polymerases I, II, and III subunit RPABC2, putative	RPB6	0.62	0.770414	0.113276
PBANKA_1231700	60S ribosomal protein L2, putative	RPL2	0.61	0.744419	0.128182
PBANKA_1441900	DNA helicase 60, putative	DH60	0.61	0.926837	0.0329967
PBANKA_1333800	RAP protein RAP21, putative	N/A	0.6	0.682996	0.165582
PBANKA_1238800	karyopherin beta, putative	N/A	0.6	0.698034	0.156123
PBANKA_0711900	heat shock protein 70	HSP70	0.6	0.771713	0.112544
PBANKA_0804100	conserved Plasmodium protein, unknown function	N/A	0.6	0.800053	0.0968815
PBANKA_0502600	peptidase, putative	N/A	0.6	0.842076	0.0746489
PBANKA_0905000	40S ribosomal protein S21, putative	RPS21	0.59	0.176688	0.752794
PBANKA_1037300	conserved Plasmodium protein, unknown function	N/A	0.59	0.371005	0.43062
PBANKA_1316400	U1 snRNP-associated protein, putative	N/A	0.59	0.535234	0.271456
PBANKA_1452500	conserved Plasmodium protein, unknown function	N/A	0.59	0.686858	0.163133
PBANKA_0208100	heptatricopeptide repeat and RAP domain-containing protein, putative	N/A	0.59	0.731391	0.13585
PBANKA_0701600	coiled-coil domain-containing protein 124, putative	CCDC124	0.59	0.731877	0.135562
PBANKA_1338300	60S ribosomal protein L6, putative	N/A	0.59	0.797288	0.098385
PBANKA_0714200	chaperone protein ClpB1, putative	ClpB1	0.59	0.803963	0.0947642
PBANKA_0937200	RNA-binding protein, putative	N/A	0.59	0.840541	0.0754412
PBANKA_1359200	DNA/RNA-binding protein Alba 2, putative	ALBA2	0.58	0.712795	0.147035
PBANKA_0916400	ubiquitin-like protein, putative	N/A	0.58	0.734806	0.133827
PBANKA_1239200	ribosome-interacting GTPase 1, putative	RBG1	0.58	0.817528	0.0874976
PBANKA_0923600	GrpE protein homolog, mitochondrial, putative	MGE1	0.57	0.0781184	1.10725
PBANKA_1329300	40S ribosomal protein S3, putative	N/A	0.57	0.730064	0.136639
PBANKA_0938400	endoplasmic reticulum-resident calcium binding protein, putative	ERC	0.57	0.799087	0.0974059
PBANKA_1458000	translation machinery-associated protein 46, putative	N/A	0.57	0.905265	0.0432242
PBANKA_1341900	ubiquitin-activating enzyme, putative	N/A	0.57	0.961638	0.0169883
PBANKA_0924400	13 kDa ribonucleoprotein-associated protein, putative	SNU13	0.56	0.224827	0.648152
PBANKA_0316800	erythrocyte membrane associated protein 2	EMAP2	0.56	0.836576	0.0774944
PBANKA_0103300	GYF domain-containing protein, putative	N/A	0.56	0.860274	0.0653632
PBANKA_0826700	lipocalin, parasitophorous vacuolar protein 5	PV5	0.55	0.317233	0.498621
PBANKA_0719600	memo-like protein	N/A	0.55	0.763774	0.117035
PBANKA_0207500	cyclin-dependent kinases regulatory subunit, putative	N/A	0.55	0.921745	0.0353893
PBANKA_1348500	Voldacs domain-containing protein, putative	N/A	0.54	0.508533	0.293681
PBANKA_0931300	dipeptidyl aminopeptidase 1, putative	DPAP1	0.53	0.34331	0.464314
PBANKA_0913400	protein phosphatase PPM8	PPM8	0.53	0.458625	0.338542
PBANKA_0618300	Ham1-like protein, putative	N/A	0.53	0.693935	0.158681
PBANKA_0721700	ran-specific GTPase-activating protein 1, putative	RANBP1	0.53	0.696246	0.157237
PBANKA_0819300	eukaryotic translation initiation factor 3 subunit F, putative	EIF3F	0.53	0.749202	0.125401
PBANKA_1127700	nicotinate phosphoribosyltransferase, putative	NAPRT	0.53	0.766426	0.11553
PBANKA_0618900	rhoptry protein, putative	N/A	0.53	0.776794	0.109694
PBANKA_0807000	DNA-directed RNA polymerase II subunit RPB1, putative	RPB1	0.53	0.788203	0.103362
PBANKA_1346700	60S ribosomal protein L23, putative	N/A	0.53	0.809934	0.0915505
PBANKA_1135700	CUGBP Elav-like family member 1, putative	CELF1	0.52	0.425608	0.37099
PBANKA_1217600	histone H2A.Z, putative	H2A.Z	0.52	0.531726	0.274312
PBANKA_0715200	eukaryotic translation initiation factor 3 subunit G, putative	EIF3G	0.52	0.613381	0.21227
PBANKA_0825600	splicing factor 3A subunit 3, putative	SF3A3	0.52	0.621026	0.20689
PBANKA_1224200	DnaJ protein, putative	N/A	0.52	0.676427	0.169779
PBANKA_1310800	40S ribosomal protein S5, putative	N/A	0.52	0.717878	0.143949
PBANKA_1206300	PHD finger protein PHD1, putative	PHD1	0.52	0.725055	0.139629
PBANKA_0414600	40S ribosomal protein S15A, putative	N/A	0.52	0.755998	0.121479
PBANKA_0522800	40S ribosomal protein S19, putative	RPS19	0.52	0.763713	0.11707
PBANKA_1106700	60S ribosomal protein L4, putative	RPL4	0.52	0.807415	0.0929031
PBANKA_0922100	40S ribosomal protein S18, putative	RPS18	0.52	0.83493	0.07835
PBANKA_1201900	40S ribosomal protein S20e, putative	N/A	0.52	0.882101	0.0544818
PBANKA_0928200	conserved protein, unknown function	N/A	0.52	0.927104	0.0328714
PBANKA_0201600	early transcribed membrane protein	ETRAMP	0.51	0.57739	0.238531
PBANKA_0929900	heat shock protein 90, putative	N/A	0.51	0.721361	0.141847
PBANKA_0101900	RNA-binding protein, putative	N/A	0.51	0.771706	0.112548
PBANKA_1356700	kelch protein K13, putative	Kelch13	0.51	0.786739	0.104169
PBANKA_0803400	40S ribosomal protein S29, putative	N/A	0.51	0.788696	0.103091
PBANKA_1215600	40S ribosomal protein S3A, putative	RPS3A	0.51	0.791607	0.10149
PBANKA_1327021	fam-a protein	N/A	0.51	0.837617	0.0769544
PBANKA_0714800	ribosome assembly protein RRB1, putative	RRB1	0.5	0.0986485	1.00591
PBANKA_0408600	eukaryotic translation initiation factor 3 subunit K, putative	EIF3K	0.5	0.688742	0.161944
PBANKA_0920000	multiprotein-bridging factor 1, putative	MBF1	0.5	0.763819	0.117009
PBANKA_0621600	conserved Plasmodium protein, unknown function	N/A	0.5	0.905561	0.0430822
PBANKA_1456800	vacuolar-sorting protein SNF7, putative	SNF7	0.49	0.435414	0.361097
PBANKA_1362900	lysine--tRNA ligase, putative	KRS1	0.49	0.752282	0.12362
PBANKA_1455300	tetratricopeptide repeat protein, putative	N/A	0.48	0.734026	0.134288
PBANKA_1325600	valine--tRNA ligase, putative	N/A	0.48	0.811927	0.0904831
PBANKA_0605300	eukaryotic translation initiation factor 5, putative	EIF5	0.48	0.816926	0.0878174
PBANKA_0315600	40S ribosomal protein S30, putative	N/A	0.48	0.832683	0.0795205
PBANKA_1244500	SNARE protein, putative	N/A	0.48	0.836025	0.0777806
PBANKA_1425100	karyopherin alpha, putative	KARalpha	0.48	0.862354	0.0643146
PBANKA_1200800	transformer-2 protein homolog beta, putative	TRA2B	0.47	0.676845	0.16951
PBANKA_0615400	serine--tRNA ligase, putative	N/A	0.47	0.801096	0.0963155
PBANKA_1420600	histone H2B variant, putative	H2B.Z	0.47	0.828362	0.0817798
PBANKA_1309500	conserved Plasmodium protein, unknown function	N/A	0.47	0.916474	0.0378796
PBANKA_1306300	protein KIC9, putative	N/A	0.46	0.477264	0.321241
PBANKA_1026200	NADP-specific glutamate dehydrogenase, putative	GDH1	0.46	0.692233	0.159748
PBANKA_1343900	PUB domain-containing protein, putative	N/A	0.46	0.736278	0.132958
PBANKA_1422400	importin subunit beta, putative	N/A	0.46	0.788712	0.103082
PBANKA_1416300	40S ribosomal protein S19, putative	RPS19	0.46	0.869533	0.0607137
PBANKA_1443300	merozoite surface protein 9, putative	N/A	0.46	0.916069	0.0380719
PBANKA_0517200	haloacid dehalogenase-like hydrolase, putative	HAD1	0.45	0.442452	0.354133
PBANKA_0513600	adenosine deaminase, putative	ADA	0.45	0.67942	0.167862
PBANKA_1013100	60S ribosomal protein L14, putative	N/A	0.45	0.768867	0.114149
PBANKA_1142800	conserved protein, unknown function	N/A	0.45	0.804108	0.0946859
PBANKA_1456100	40S ribosomal protein S17, putative	N/A	0.45	0.883751	0.0536699
PBANKA_1146000	tryptophan-rich protein	N/A	0.45	0.918543	0.0369004
PBANKA_1343000	ribose-phosphate pyrophosphokinase, putative	N/A	0.44	0.37339	0.427838
PBANKA_0814200	elongation factor 1-beta, putative	N/A	0.44	0.664334	0.177613
PBANKA_1309700	ATP-dependent RNA helicase DDX17, putative	DDX17	0.44	0.808485	0.092328
PBANKA_0619100	40S ribosomal protein S5, putative	N/A	0.44	0.881975	0.0545439
PBANKA_0107100	proteasome subunit alpha type-2, putative	N/A	0.43	0.486319	0.313078
PBANKA_1214000	heat shock protein 60, putative	HSP60	0.43	0.510605	0.291915
PBANKA_1410300	M1-family alanyl aminopeptidase, putative	M1AAP	0.43	0.725287	0.13949
PBANKA_0903600	dynamin-like protein, putative	DYN1	0.43	0.728693	0.137456
PBANKA_1122900	hexokinase, putative	HK	0.43	0.739837	0.130864
PBANKA_0310000	protein SIS1, putative	SIS1	0.43	0.753594	0.122863
PBANKA_1308900	histidine--tRNA ligase, putative	N/A	0.43	0.780488	0.107634
PBANKA_0823000	ubiquitin-like protein, putative	N/A	0.43	0.79743	0.0983072
PBANKA_1411300	eukaryotic translation initation factor 4 gamma, putative	EIF4G	0.43	0.82555	0.0832566
PBANKA_1423500	60S ribosomal protein L13-2, putative	N/A	0.43	0.867181	0.0618903
PBANKA_1117400	conserved protein, unknown function	N/A	0.42	0.212339	0.672969
PBANKA_1105500	mediator of RNA polymerase II transcription subunit 11, putative	MED11	0.42	0.399725	0.398239
PBANKA_1204400	DNA/RNA-binding protein Alba 3, putative	ALBA3	0.42	0.457907	0.339222
PBANKA_0928100	phosphoglycerate mutase, putative	PGM1	0.42	0.703434	0.152777
PBANKA_1232100	serine/arginine-rich splicing factor 1, putative	SR1	0.42	0.745347	0.127641
PBANKA_0920900	protein disulfide-isomerase, putative	N/A	0.42	0.77494	0.110732
PBANKA_0600500	GPN-loop GTPase, putative	N/A	0.42	0.781424	0.107113
PBANKA_1415000	pre-mRNA-processing factor 40, putative	PRP40	0.42	0.940959	0.0264294
PBANKA_1116800	BFR1 domain-containing protein, putative	N/A	0.42	0.980717	0.00845625
PBANKA_1235300	bis(5'-nucleosyl)-tetraphosphatase [asymmetrical], putative	N/A	0.41	0.324966	0.488162
PBANKA_1456900	translation initiation factor SUI1, putative	N/A	0.41	0.52179	0.282504
PBANKA_1037900	conserved Plasmodium protein, unknown function	N/A	0.41	0.91918	0.0365996
PBANKA_0941200	tRNA-splicing ligase RtcB, putative	RTCB	0.41	0.940431	0.0266729
PBANKA_1300096	fam-b protein	N/A	0.4	0.49242	0.307664
PBANKA_1101400	rhoptry-associated protein 2/3	RAP2/3	0.4	0.642996	0.191791
PBANKA_1432000	signal recognition particle subunit SRP19, putative	SRP19	0.4	0.728863	0.137354
PBANKA_1452600	calcyclin binding protein, putative	N/A	0.4	0.818735	0.0868567
PBANKA_0108700	RNA-binding protein 25, putative	RBM25	0.4	0.855821	0.0676169
PBANKA_1215500	translation machinery-associated protein 7, putative	TMA7	0.4	0.931436	0.0308468
PBANKA_1241900	ubiquitin-conjugating enzyme E2 13, putative	UBC13	0.39	0.226237	0.645436
PBANKA_0619300	conserved Plasmodium protein, unknown function	N/A	0.39	0.535597	0.271162
PBANKA_0618600	conserved protein, unknown function	N/A	0.39	0.62467	0.20435
PBANKA_0712900	high mobility group protein B2	HMGB2	0.39	0.705503	0.151501
PBANKA_0905800	DnaJ protein, putative	N/A	0.39	0.713589	0.146552
PBANKA_0311000	protein transport protein SEC31, putative	SEC31	0.39	0.752068	0.123743
PBANKA_1365200	thioredoxin-related protein, putative	N/A	0.39	0.794317	0.100006
PBANKA_1122000	nuclear polyadenylated RNA-binding protein NAB2	NAB2	0.39	0.812445	0.0902059
PBANKA_0609900	heat shock protein DNAJ homologue Pfj4, putative	N/A	0.39	0.82982	0.0810163
PBANKA_0943300	actin-like protein, putative	ALP2a	0.39	0.861622	0.0646832
PBANKA_1202700	RNA-binding protein, putative	N/A	0.38	0.463275	0.334161
PBANKA_0517000	early transcribed membrane protein	ETRAMP10.2	0.38	0.627874	0.202127
PBANKA_0916200	T-complex protein 1 subunit alpha, putative	TCP1	0.38	0.77529	0.110536
PBANKA_0709400	conserved Plasmodium protein, unknown function	N/A	0.38	0.81447	0.0891247
PBANKA_1323200	AP-4 complex accessory subunit Tepsin, putative	N/A	0.38	0.824154	0.0839914
PBANKA_0404700	glutaredoxin 1, putative	GRX1	0.38	0.877616	0.0566952
PBANKA_0908800	conserved Plasmodium protein, unknown function	N/A	0.38	0.886171	0.0524827
PBANKA_0909100	ER membrane protein complex subunit 8, putative	EMC8	0.37	0.601207	0.220976
PBANKA_0905600	translation initiation factor eIF-1A, putative	N/A	0.37	0.706114	0.151125
PBANKA_1450600	vesicle transport v-SNARE protein VTI1, putative	N/A	0.37	0.737385	0.132305
PBANKA_1000600	erythrocyte membrane antigen 1	N/A	0.37	0.73955	0.131033
PBANKA_1410000	26S protease regulatory subunit 7, putative	RPT1	0.37	0.788513	0.103191
PBANKA_0804900	E3 ubiquitin-protein ligase, putative	N/A	0.37	0.839386	0.0760382
PBANKA_1318100	aminopeptidase P, putative	APP	0.37	0.853085	0.0690077
PBANKA_0503600	60S ribosomal protein L30e, putative	N/A	0.37	0.874306	0.0583368
PBANKA_1112400	orotate phosphoribosyltransferase, putative	OPRT	0.37	0.905527	0.0430987
PBANKA_0208600	conserved protein, unknown function	N/A	0.36	0.419275	0.377501
PBANKA_0928700	ubiquitin-protein ligase, putative	N/A	0.36	0.505506	0.296273
PBANKA_0720600	trafficking protein particle complex subunit 3, putative	BET3	0.36	0.592537	0.227285
PBANKA_1306000	replication factor A protein 3, putative	RPA3	0.36	0.643688	0.191324
PBANKA_1417800	tRNA (guanine(26)-N(2))-dimethyltransferase, putative	TRM1	0.36	0.674596	0.170956
PBANKA_1144000	26S proteasome regulatory subunit RPN11, putative	RPN11	0.36	0.683884	0.165018
PBANKA_1340300	phosphoribosylpyrophosphate synthetase, putative	N/A	0.36	0.715933	0.145128
PBANKA_1234800	40S ribosomal protein S9, putative	RPS9	0.36	0.821124	0.0855914
PBANKA_0306800	ATP-dependent RNA helicase UAP56, putative	UAP56	0.36	0.898166	0.0466432
PBANKA_1409600	meiosis-specific nuclear structural protein 1, putative	N/A	0.36	0.943227	0.025384
PBANKA_1246161	fam-a protein	N/A	0.35	0.0970604	1.01296
PBANKA_1135100	40S ribosomal protein S15, putative	RPS15	0.35	0.890852	0.0501946
PBANKA_1454800	female development protein FD1	FD1	0.35	0.912673	0.0396848
PBANKA_1202400	60S ribosomal protein L13, putative	N/A	0.35	0.920938	0.0357697
PBANKA_1405500	exosome complex component RRP40, putative	RRP40	0.35	0.953675	0.0205997
PBANKA_0602800	ubiquitin-conjugating enzyme E2, putative	UBC	0.34	0.451636	0.345211
PBANKA_1223100	proteasome subunit alpha type-6, putative	N/A	0.34	0.488507	0.31113
PBANKA_0901200	peroxisome assembly protein 22, putative	PEX22	0.34	0.627853	0.202142
PBANKA_1120700	nascent polypeptide-associated complex subunit alpha, putative	N/A	0.34	0.652754	0.18525
PBANKA_0823900	DNA-directed RNA polymerase II subunit RPB3, putative	RPB3	0.34	0.675021	0.170683
PBANKA_1434200	arginine--tRNA ligase, putative	RRS	0.34	0.74282	0.129117
PBANKA_1207200	adenylate kinase, putative	AK1	0.34	0.774483	0.110988
PBANKA_1028100	mRNA-capping enzyme subunit alpha, putative	N/A	0.34	0.798561	0.0976921
PBANKA_1022800	glycine--tRNA ligase, putative	GlyRS	0.34	0.80472	0.0943554
PBANKA_1117100	histone H3 variant	H3.3	0.34	0.838812	0.0763352
PBANKA_0810600	exoribonuclease, putative	N/A	0.34	0.901116	0.0452194
PBANKA_0619900	Obg-like ATPase 1, putative	OLA1	0.34	0.927392	0.0327366
PBANKA_1019700	NTF2-like domain-containing protein	N/A	0.34	0.93889	0.0273852
PBANKA_0611800	N-acetyltransferase, GNAT family, putative	NAT8	0.33	0.404882	0.392672
PBANKA_0405400	40S ribosomal protein S12, putative	RPS12	0.33	0.456664	0.340403
PBANKA_0409800	ATP synthase F0 subunit d-like protein, putative	N/A	0.33	0.674528	0.171
PBANKA_0809100	proteasome activator 28, putative	PA28	0.33	0.676269	0.16988
PBANKA_1120200	pyridoxine biosynthesis protein PDX1, putative	PDX1	0.33	0.738659	0.131556
PBANKA_1231800	60S ribosomal protein L12, putative	N/A	0.33	0.795207	0.0995198
PBANKA_0923700	ethanolamine kinase, putative	EK	0.33	0.802874	0.0953524
PBANKA_1423900	translation initiation factor SUI1, putative	N/A	0.33	0.826523	0.0827449
PBANKA_1134100	T-complex protein 1 subunit delta, putative	CCT4	0.33	0.859888	0.0655581
PBANKA_0939600	polyadenylate-binding protein-interacting protein 1, putative	PAIP1	0.33	0.890837	0.0502017
PBANKA_0709000	protein transport protein SEC61 subunit beta, putative	SEC61B	0.33	0.901849	0.0448663
PBANKA_1343200	conserved Plasmodium protein, unknown function	N/A	0.33	0.940812	0.0264971
PBANKA_1221200	60S ribosomal protein L34, putative	RPL34	0.33	0.951821	0.0214446
PBANKA_1347600	eukaryotic translation initiation factor 6, putative	N/A	0.32	0.17329	0.761227
PBANKA_0902300	female development protein FD2	FD2	0.32	0.711581	0.147776
PBANKA_0818900	endoplasmic reticulum chaperone BiP, putative	BIP	0.32	0.733086	0.134845
PBANKA_0941100	conserved Apicomplexan protein, unknown function	N/A	0.32	0.7407	0.130357
PBANKA_1231200	phosducin-like protein 1, putative	PhLP1	0.32	0.765096	0.116284
PBANKA_0819900	nucleosome assembly protein	NAPS	0.32	0.806699	0.0932882
PBANKA_1404900	26S protease regulatory subunit 10B, putative	RPT4	0.32	0.843554	0.073887
PBANKA_1231000	40S ribosomal protein S11, putative	RPS11	0.32	0.848184	0.0715098
PBANKA_0516600	leucine-rich repeat protein 1	LRR1	0.31	0.624831	0.204237
PBANKA_0920100	prefoldin subunit 5	PCS5	0.31	0.65605	0.183063
PBANKA_1444000	macrophage migration inhibitory factor	MIF	0.31	0.696982	0.156778
PBANKA_1034400	plasmepsin IV	PM4	0.31	0.711171	0.148026
PBANKA_1140600	DNA-directed RNA polymerases I, II, and III subunit RPABC1, putative	RPB5	0.31	0.718235	0.143734
PBANKA_1426100	conserved protein, unknown function	N/A	0.31	0.794709	0.0997918
PBANKA_0502200	26S proteasome regulatory subunit p55, putative	RPN5	0.31	0.822578	0.0848228
PBANKA_1237500	pre-mRNA-splicing factor BUD31, putative	BUD31	0.31	0.825901	0.0830718
PBANKA_1331400	MORC family protein, putative	MORC	0.31	0.829132	0.0813761
PBANKA_0604300	tetratricopeptide repeat protein, putative	TRP1	0.31	0.861748	0.0646195
PBANKA_1347400	DNA-(apurinic or apyrimidinic site) lyase 1	APN1	0.31	0.8739	0.0585384
PBANKA_1354400	60S ribosomal protein L18, putative	N/A	0.31	0.912385	0.0398217
PBANKA_0506100	PHAX domain-containing protein, putative	N/A	0.31	0.941013	0.0264043
PBANKA_1408000	H/ACA ribonucleoprotein complex subunit 1, putative	GAR1	0.31	0.993636	0.00277258
PBANKA_0211500	proteasome subunit alpha type-5, putative	N/A	0.3	0.201192	0.696389
PBANKA_0931200	heat shock protein 101	HSP101	0.3	0.395146	0.403243
PBANKA_0917900	26S protease regulatory subunit 6A, putative	RPT5	0.3	0.559986	0.251823
PBANKA_0919800	bifunctional farnesyl/geranylgeranyl diphosphate synthase, putative	FPPS/GGPPS	0.3	0.698852	0.155615
PBANKA_0304300	adenylosuccinate lyase, putative	ADSL	0.3	0.733142	0.134812
PBANKA_0823400	phosphoglycerate kinase, putative	PGK	0.3	0.76698	0.115216
PBANKA_0604700	shewanella-like protein phosphatase 2, putative	SHLP2	0.3	0.768243	0.114501
PBANKA_0910200	protein phosphatase PPM2	PPM2	0.3	0.771745	0.112526
PBANKA_1206600	26S protease regulatory subunit 4, putative	N/A	0.3	0.808364	0.092393
PBANKA_1137800	glideosome-associated connector	GAC	0.3	0.837273	0.0771328
PBANKA_0310900	T-complex protein 1 subunit theta, putative	CCT8	0.3	0.838661	0.0764134
PBANKA_0405600	end-binding protein 1	EB1	0.3	0.862637	0.0641718
PBANKA_0416000	high molecular weight rhoptry protein 3, putative	RhopH3	0.3	0.882149	0.0544582
PBANKA_0824800	polyadenylate-binding protein 2, putative	PABP2	0.3	0.885544	0.0527901
PBANKA_0416800	ubiquitin specific protease, putative	N/A	0.3	0.967895	0.0141718
PBANKA_0517500	bromodomain protein 1, putative	BDP1	0.29	0.588259	0.230432
PBANKA_0415200	vacuolar protein sorting-associated protein 46, putative	VPS46	0.29	0.670625	0.17352
PBANKA_1348100	AMMECR1 domain-containing protein, putative	N/A	0.29	0.73239	0.135257
PBANKA_1214300	enolase, putative	ENO	0.29	0.735579	0.133371
PBANKA_0813000	inhibitor of cysteine proteases	ICP	0.29	0.769308	0.1139
PBANKA_1104800	actin-like protein, putative	ALP2b	0.29	0.83933	0.0760673
PBANKA_1336100	dihydroorotase, putative	DHOase	0.29	0.910662	0.040643
PBANKA_1458300	kinesin-13	N/A	0.29	0.94602	0.0240999
PBANKA_1413100	lipoate-protein ligase 1	LipL1	0.28	0.55804	0.253335
PBANKA_0405200	T-complex protein 1 subunit beta, putative	CCT2	0.28	0.601991	0.22041
PBANKA_0813900	26S proteasome regulatory subunit RPN8, putative	RPN8	0.28	0.74812	0.126029
PBANKA_1305000	conserved Plasmodium protein, unknown function	N/A	0.28	0.768581	0.114311
PBANKA_1117000	histone H2A, putative	H2A	0.28	0.769524	0.113778
PBANKA_0602700	nucleosome assembly protein, putative	NAPL	0.28	0.771324	0.112763
PBANKA_1331100	conserved Plasmodium protein, unknown function	N/A	0.28	0.812533	0.090159
PBANKA_1429600	proline--tRNA ligase	PRS	0.28	0.826783	0.0826084
PBANKA_1305700	vacuolar protein sorting-associated protein 60, putative	VPS60	0.28	0.874944	0.0580199
PBANKA_0715600	26S protease regulatory subunit 6B, putative	RPT3	0.28	0.910348	0.0407926
PBANKA_1349000	MSP7-like protein	MSRP2	0.28	0.962705	0.0165067
PBANKA_1003300	TMEM33 domain-containing protein	TMEM33	0.28	0.987373	0.0055189
PBANKA_0828900	conserved Plasmodium protein, unknown function	N/A	0.28	0.999223	0.000337628
PBANKA_0404200	ubiquitin-conjugating enzyme MMS2, putative	N/A	0.27	0.133782	0.873602
PBANKA_0712600	14-3-3 protein	14-3-3I	0.27	0.468704	0.329101
PBANKA_0105300	WD repeat-containing protein, putative	N/A	0.27	0.692954	0.159296
PBANKA_0508100	chromodomain-helicase-DNA-binding protein 1, putative	CHD1	0.27	0.790635	0.102024
PBANKA_0905700	DNA-directed RNA polymerases I and III subunit RPAC1, putative	RPC40	0.27	0.793839	0.100268
PBANKA_1107200	protein CAF40, putative	CAF40	0.27	0.833819	0.0789284
PBANKA_1318400	6-phosphogluconate dehydrogenase, decarboxylating, putative	6PGD	0.27	0.836184	0.0776982
PBANKA_1426700	hydroxymethyldihydropterin pyrophosphokinase-dihydropteroate synthase, putative	PPPK-DHPS	0.27	0.870978	0.0599927
PBANKA_0524300	tryptophan-rich protein IPIS2	IPIS2	0.27	0.929313	0.0318378
[truncated: 935 more rows]

## Sheet: Supp. Table 6
Supp. Table 6: Quantitative proteomics of Pbnek4-ko 2 hpa versus Pbnek4-ko 0 hpa parasites
[truncated: 1,261 more rows]

[truncated: 8 more sheets: Supp. Table 7, Supp. Table 8, Supp. Table 9, Supp. Table 10, Supp. Table 11, Supp. Table 12, Supp. Table 13, Supp. Table 14]
